# Supplementary material
Source: publisher figshare collection journal article supplement (https://acs.figshare.com/ndownloader/files/4689340)
Supplement: Supplementary file 1 [file 4689340]

REMARK    GENERATED BY TRJCONV
TITLE      CONFIGURATION #9            t=   0.00000
MODEL        0
ATOM      1  N   ALA     1     -18.330   7.126   5.327  1.00  0.00
ATOM      2  H1  ALA     1     -18.419   6.117   5.381  1.00  0.00
ATOM      3  H2  ALA     1     -19.220   7.521   5.053  1.00  0.00
ATOM      4  H3  ALA     1     -18.096   7.478   6.247  1.00  0.00
ATOM      5  CA  ALA     1     -17.301   7.502   4.373  1.00  0.00
ATOM      6  HA  ALA     1     -17.212   8.587   4.340  1.00  0.00
ATOM      7  CB  ALA     1     -16.028   6.875   4.935  1.00  0.00
ATOM      8  HB1 ALA     1     -15.877   7.260   5.940  1.00  0.00
ATOM      9  HB2 ALA     1     -16.128   5.790   5.005  1.00  0.00
ATOM     10  HB3 ALA     1     -15.161   7.135   4.328  1.00  0.00
ATOM     11  C   ALA     1     -17.746   6.982   3.009  1.00  0.00
ATOM     12  O   ALA     1     -18.333   5.892   2.903  1.00  0.00
ATOM     13  N   GLU     2     -17.539   7.801   1.984  1.00  0.00
ATOM     14  H   GLU     2     -17.063   8.684   2.133  1.00  0.00
ATOM     15  CA  GLU     2     -17.773   7.450   0.604  1.00  0.00
ATOM     16  HA  GLU     2     -17.463   6.415   0.439  1.00  0.00
ATOM     17  CB  GLU     2     -19.282   7.622   0.409  1.00  0.00
ATOM     18  HB2 GLU     2     -19.798   7.067   1.192  1.00  0.00
ATOM     19  HB3 GLU     2     -19.562   8.672   0.504  1.00  0.00
ATOM     20  CG  GLU     2     -19.694   7.066  -0.952  1.00  0.00
ATOM     21  HG2 GLU     2     -19.328   7.734  -1.734  1.00  0.00
ATOM     22  HG3 GLU     2     -19.216   6.098  -1.098  1.00  0.00
ATOM     23  CD  GLU     2     -21.167   6.856  -1.120  1.00  0.00
ATOM     24  OE1 GLU     2     -21.609   6.922  -2.299  1.00  0.00
ATOM     25  OE2 GLU     2     -21.819   6.676  -0.065  1.00  0.00
ATOM     26  C   GLU     2     -16.974   8.430  -0.293  1.00  0.00
ATOM     27  O   GLU     2     -16.919   9.627   0.031  1.00  0.00
ATOM     28  N   CYS     3     -16.389   7.928  -1.407  1.00  0.00
ATOM     29  H   CYS     3     -16.587   6.949  -1.600  1.00  0.00
ATOM     30  CA  CYS     3     -15.599   8.627  -2.461  1.00  0.00
ATOM     31  HA  CYS     3     -15.079   7.848  -3.014  1.00  0.00
ATOM     32  CB  CYS     3     -16.509   9.344  -3.447  1.00  0.00
ATOM     33  HB2 CYS     3     -17.146  10.038  -2.898  1.00  0.00
ATOM     34  HB3 CYS     3     -15.883   9.924  -4.126  1.00  0.00
ATOM     35  SG  CYS     3     -17.538   8.309  -4.482  1.00  0.00
ATOM     36  C   CYS     3     -14.511   9.608  -1.967  1.00  0.00
ATOM     37  O   CYS     3     -13.951  10.433  -2.703  1.00  0.00
ATOM     38  N   SER     4     -14.187   9.475  -0.691  1.00  0.00
ATOM     39  H   SER     4     -14.788   8.885  -0.135  1.00  0.00
ATOM     40  CA  SER     4     -13.025  10.050  -0.012  1.00  0.00
ATOM     41  HA  SER     4     -12.160   9.924  -0.663  1.00  0.00
ATOM     42  CB  SER     4     -13.191  11.565   0.233  1.00  0.00
ATOM     43  HB2 SER     4     -12.337  11.926   0.806  1.00  0.00
ATOM     44  HB3 SER     4     -13.147  12.047  -0.742  1.00  0.00
ATOM     45  OG  SER     4     -14.399  11.969   0.846  1.00  0.00
ATOM     46  HG  SER     4     -14.303  12.901   1.119  1.00  0.00
ATOM     47  C   SER     4     -12.709   9.331   1.297  1.00  0.00
ATOM     48  O   SER     4     -13.518   8.506   1.756  1.00  0.00
ATOM     49  N   VAL     5     -11.543   9.667   1.856  1.00  0.00
ATOM     50  H   VAL     5     -11.007  10.406   1.409  1.00  0.00
ATOM     51  CA  VAL     5     -11.015   9.148   3.106  1.00  0.00
ATOM     52  HA  VAL     5     -11.880   9.015   3.756  1.00  0.00
ATOM     53  CB  VAL     5     -10.411   7.753   2.881  1.00  0.00
ATOM     54  HB  VAL     5     -11.061   7.201   2.198  1.00  0.00
ATOM     55  CG1 VAL     5      -8.993   7.787   2.291  1.00  0.00
ATOM     56 HG11 VAL     5      -8.274   8.156   3.024  1.00  0.00
ATOM     57 HG12 VAL     5      -8.699   6.786   1.976  1.00  0.00
ATOM     58 HG13 VAL     5      -8.992   8.454   1.435  1.00  0.00
ATOM     59  CG2 VAL     5     -10.394   6.993   4.199  1.00  0.00
ATOM     60 HG21 VAL     5     -11.353   7.077   4.706  1.00  0.00
ATOM     61 HG22 VAL     5     -10.212   5.940   3.989  1.00  0.00
ATOM     62 HG23 VAL     5      -9.597   7.372   4.839  1.00  0.00
ATOM     63  C   VAL     5     -10.055  10.113   3.828  1.00  0.00
ATOM     64  O   VAL     5      -9.154  10.747   3.262  1.00  0.00
ATOM     65  N   ASP     6     -10.320  10.214   5.127  1.00  0.00
ATOM     66  H   ASP     6     -11.139   9.717   5.461  1.00  0.00
ATOM     67  CA  ASP     6      -9.527  10.943   6.130  1.00  0.00
ATOM     68  HA  ASP     6      -8.996  11.759   5.642  1.00  0.00
ATOM     69  CB  ASP     6     -10.449  11.531   7.209  1.00  0.00
ATOM     70  HB2 ASP     6     -11.295  12.019   6.736  1.00  0.00
ATOM     71  HB3 ASP     6     -10.842  10.721   7.826  1.00  0.00
ATOM     72  CG  ASP     6      -9.745  12.541   8.088  1.00  0.00
ATOM     73  OD1 ASP     6      -9.408  13.657   7.653  1.00  0.00
ATOM     74  OD2 ASP     6      -9.533  12.247   9.271  1.00  0.00
ATOM     75  C   ASP     6      -8.494  10.037   6.792  1.00  0.00
ATOM     76  O   ASP     6      -8.751   8.852   7.025  1.00  0.00
ATOM     77  N   ILE     7      -7.310  10.574   7.077  1.00  0.00
ATOM     78  H   ILE     7      -7.111  11.528   6.789  1.00  0.00
ATOM     79  CA  ILE     7      -6.182   9.755   7.517  1.00  0.00
ATOM     80  HA  ILE     7      -6.557   9.051   8.259  1.00  0.00
ATOM     81  CB  ILE     7      -5.601   8.951   6.307  1.00  0.00
ATOM     82  HB  ILE     7      -6.375   8.237   6.022  1.00  0.00
ATOM     83  CG2 ILE     7      -5.321   9.789   5.038  1.00  0.00
ATOM     84 HG21 ILE     7      -6.179  10.413   4.794  1.00  0.00
ATOM     85 HG22 ILE     7      -4.449  10.424   5.186  1.00  0.00
ATOM     86 HG23 ILE     7      -5.175   9.150   4.168  1.00  0.00
ATOM     87  CG1 ILE     7      -4.335   8.110   6.634  1.00  0.00
ATOM     88 HG12 ILE     7      -3.505   8.767   6.891  1.00  0.00
ATOM     89 HG13 ILE     7      -4.543   7.460   7.481  1.00  0.00
ATOM     90  CD1 ILE     7      -3.859   7.233   5.467  1.00  0.00
ATOM     91 HD11 ILE     7      -4.661   6.577   5.131  1.00  0.00
ATOM     92 HD12 ILE     7      -3.541   7.855   4.637  1.00  0.00
ATOM     93 HD13 ILE     7      -3.001   6.637   5.778  1.00  0.00
ATOM     94  C   ILE     7      -5.095  10.569   8.194  1.00  0.00
ATOM     95  O   ILE     7      -4.893  11.744   7.911  1.00  0.00
ATOM     96  N   GLN     8      -4.337   9.908   9.057  1.00  0.00
ATOM     97  H   GLN     8      -4.572   8.940   9.252  1.00  0.00
ATOM     98  CA  GLN     8      -3.384  10.556   9.935  1.00  0.00
ATOM     99  HA  GLN     8      -3.040  11.490   9.491  1.00  0.00
ATOM    100  CB  GLN     8      -4.031  10.841  11.308  1.00  0.00
ATOM    101  HB2 GLN     8      -4.102   9.915  11.879  1.00  0.00
ATOM    102  HB3 GLN     8      -3.368  11.510  11.858  1.00  0.00
ATOM    103  CG  GLN     8      -5.418  11.514  11.259  1.00  0.00
ATOM    104  HG2 GLN     8      -5.276  12.450  10.721  1.00  0.00
ATOM    105  HG3 GLN     8      -6.141  10.927  10.700  1.00  0.00
ATOM    106  CD  GLN     8      -6.017  11.827  12.618  1.00  0.00
ATOM    107  OE1 GLN     8      -6.251  10.950  13.422  1.00  0.00
ATOM    108  NE2 GLN     8      -6.279  13.082  12.915  1.00  0.00
ATOM    109 HE21 GLN     8      -6.659  13.303  13.822  1.00  0.00
ATOM    110 HE22 GLN     8      -6.373  13.742  12.153  1.00  0.00
ATOM    111  C   GLN     8      -2.170   9.671  10.161  1.00  0.00
ATOM    112  O   GLN     8      -2.257   8.447  10.079  1.00  0.00
ATOM    113  N   GLY     9      -1.066  10.311  10.537  1.00  0.00
ATOM    114  H   GLY     9      -1.121  11.320  10.643  1.00  0.00
ATOM    115  CA  GLY     9       0.144   9.658  11.040  1.00  0.00
ATOM    116  HA2 GLY     9      -0.158   8.734  11.533  1.00  0.00
ATOM    117  HA3 GLY     9       0.813   9.391  10.222  1.00  0.00
ATOM    118  C   GLY     9       0.896  10.478  12.102  1.00  0.00
ATOM    119  O   GLY     9       0.588  11.647  12.377  1.00  0.00
ATOM    120  N   ASN    10       1.742   9.745  12.839  1.00  0.00
ATOM    121  H   ASN    10       1.939   8.797  12.530  1.00  0.00
ATOM    122  CA  ASN    10       2.068  10.051  14.234  1.00  0.00
ATOM    123  HA  ASN    10       1.620  11.016  14.462  1.00  0.00
ATOM    124  CB  ASN    10       1.355   9.045  15.187  1.00  0.00
ATOM    125  HB2 ASN    10       1.334   9.447  16.190  1.00  0.00
ATOM    126  HB3 ASN    10       0.318   8.917  14.879  1.00  0.00
ATOM    127  CG  ASN    10       1.994   7.700  15.305  1.00  0.00
ATOM    128  OD1 ASN    10       3.048   7.450  14.744  1.00  0.00
ATOM    129  ND2 ASN    10       1.346   6.836  16.049  1.00  0.00
ATOM    130 HD21 ASN    10       1.802   5.979  16.319  1.00  0.00
ATOM    131 HD22 ASN    10       0.445   7.104  16.433  1.00  0.00
ATOM    132  C   ASN    10       3.606  10.257  14.405  1.00  0.00
ATOM    133  O   ASN    10       4.419   9.926  13.520  1.00  0.00
ATOM    134  N   ASP    11       4.021  10.705  15.606  1.00  0.00
ATOM    135  H   ASP    11       3.303  10.925  16.291  1.00  0.00
ATOM    136  CA  ASP    11       5.411  10.762  16.109  1.00  0.00
ATOM    137  HA  ASP    11       6.000  11.387  15.436  1.00  0.00
ATOM    138  CB  ASP    11       5.414  11.417  17.506  1.00  0.00
ATOM    139  HB2 ASP    11       4.954  10.771  18.256  1.00  0.00
ATOM    140  HB3 ASP    11       6.452  11.544  17.800  1.00  0.00
ATOM    141  CG  ASP    11       4.821  12.806  17.548  1.00  0.00
ATOM    142  OD1 ASP    11       5.163  13.646  16.685  1.00  0.00
ATOM    143  OD2 ASP    11       4.138  13.099  18.549  1.00  0.00
ATOM    144  C   ASP    11       6.126   9.379  16.274  1.00  0.00
ATOM    145  O   ASP    11       7.284   9.325  16.705  1.00  0.00
ATOM    146  N   GLN    12       5.428   8.252  16.020  1.00  0.00
ATOM    147  H   GLN    12       4.506   8.384  15.619  1.00  0.00
ATOM    148  CA  GLN    12       5.762   6.830  16.337  1.00  0.00
ATOM    149  HA  GLN    12       6.727   6.807  16.846  1.00  0.00
ATOM    150  CB  GLN    12       4.703   6.166  17.283  1.00  0.00
ATOM    151  HB2 GLN    12       3.740   6.099  16.790  1.00  0.00
ATOM    152  HB3 GLN    12       5.002   5.138  17.456  1.00  0.00
ATOM    153  CG  GLN    12       4.528   6.833  18.663  1.00  0.00
ATOM    154  HG2 GLN    12       4.309   6.048  19.389  1.00  0.00
ATOM    155  HG3 GLN    12       5.458   7.322  18.952  1.00  0.00
ATOM    156  CD  GLN    12       3.371   7.860  18.741  1.00  0.00
ATOM    157  OE1 GLN    12       3.260   8.894  18.094  1.00  0.00
ATOM    158  NE2 GLN    12       2.397   7.626  19.567  1.00  0.00
ATOM    159 HE21 GLN    12       1.646   8.299  19.595  1.00  0.00
ATOM    160 HE22 GLN    12       2.281   6.681  19.921  1.00  0.00
ATOM    161  C   GLN    12       5.897   5.979  15.038  1.00  0.00
ATOM    162  O   GLN    12       5.913   4.751  15.117  1.00  0.00
ATOM    163  N   MET    13       6.006   6.594  13.845  1.00  0.00
ATOM    164  H   MET    13       5.913   7.599  13.846  1.00  0.00
ATOM    165  CA  MET    13       5.982   5.906  12.536  1.00  0.00
ATOM    166  HA  MET    13       5.833   6.680  11.786  1.00  0.00
ATOM    167  CB  MET    13       7.328   5.212  12.210  1.00  0.00
ATOM    168  HB2 MET    13       7.600   4.542  13.027  1.00  0.00
ATOM    169  HB3 MET    13       7.249   4.625  11.293  1.00  0.00
ATOM    170  CG  MET    13       8.445   6.240  12.010  1.00  0.00
ATOM    171  HG2 MET    13       8.173   6.859  11.155  1.00  0.00
ATOM    172  HG3 MET    13       8.502   6.869  12.895  1.00  0.00
ATOM    173  SD  MET    13      10.099   5.562  11.672  1.00  0.00
ATOM    174  CE  MET    13      10.826   5.469  13.342  1.00  0.00
ATOM    175  HE1 MET    13      11.852   5.102  13.275  1.00  0.00
ATOM    176  HE2 MET    13      10.837   6.455  13.804  1.00  0.00
ATOM    177  HE3 MET    13      10.241   4.791  13.964  1.00  0.00
ATOM    178  C   MET    13       4.785   4.975  12.346  1.00  0.00
ATOM    179  O   MET    13       4.933   3.902  11.771  1.00  0.00
ATOM    180  N   GLN    14       3.592   5.390  12.767  1.00  0.00
ATOM    181  H   GLN    14       3.522   6.203  13.370  1.00  0.00
ATOM    182  CA  GLN    14       2.368   4.747  12.355  1.00  0.00
ATOM    183  HA  GLN    14       2.597   3.981  11.622  1.00  0.00
ATOM    184  CB  GLN    14       1.678   4.076  13.507  1.00  0.00
ATOM    185  HB2 GLN    14       1.402   4.801  14.272  1.00  0.00
ATOM    186  HB3 GLN    14       0.776   3.624  13.099  1.00  0.00
ATOM    187  CG  GLN    14       2.517   2.944  14.106  1.00  0.00
ATOM    188  HG2 GLN    14       3.508   3.287  14.399  1.00  0.00
ATOM    189  HG3 GLN    14       2.002   2.647  15.020  1.00  0.00
ATOM    190  CD  GLN    14       2.629   1.668  13.276  1.00  0.00
ATOM    191  OE1 GLN    14       2.191   1.528  12.154  1.00  0.00
ATOM    192  NE2 GLN    14       2.987   0.584  13.906  1.00  0.00
ATOM    193 HE21 GLN    14       2.917  -0.322  13.477  1.00  0.00
ATOM    194 HE22 GLN    14       3.309   0.655  14.862  1.00  0.00
ATOM    195  C   GLN    14       1.432   5.706  11.699  1.00  0.00
ATOM    196  O   GLN    14       1.418   6.881  12.066  1.00  0.00
ATOM    197  N   PHE    15       0.753   5.195  10.668  1.00  0.00
ATOM    198  H   PHE    15       0.939   4.230  10.410  1.00  0.00
ATOM    199  CA  PHE    15      -0.522   5.752  10.235  1.00  0.00
ATOM    200  HA  PHE    15      -0.452   6.836  10.252  1.00  0.00
ATOM    201  CB  PHE    15      -0.845   5.289   8.812  1.00  0.00
ATOM    202  HB2 PHE    15      -0.775   4.200   8.774  1.00  0.00
ATOM    203  HB3 PHE    15      -1.883   5.534   8.591  1.00  0.00
ATOM    204  CG  PHE    15      -0.040   5.899   7.693  1.00  0.00
ATOM    205  CD1 PHE    15       0.120   7.293   7.521  1.00  0.00
ATOM    206  HD1 PHE    15      -0.270   7.985   8.253  1.00  0.00
ATOM    207  CE1 PHE    15       0.774   7.784   6.372  1.00  0.00
ATOM    208  HE1 PHE    15       0.916   8.847   6.227  1.00  0.00
ATOM    209  CZ  PHE    15       1.226   6.888   5.389  1.00  0.00
ATOM    210  HZ  PHE    15       1.712   7.263   4.498  1.00  0.00
ATOM    211  CE2 PHE    15       1.073   5.507   5.578  1.00  0.00
ATOM    212  HE2 PHE    15       1.439   4.815   4.835  1.00  0.00
ATOM    213  CD2 PHE    15       0.461   5.015   6.734  1.00  0.00
ATOM    214  HD2 PHE    15       0.341   3.948   6.860  1.00  0.00
ATOM    215  C   PHE    15      -1.694   5.345  11.147  1.00  0.00
ATOM    216  O   PHE    15      -1.636   4.297  11.792  1.00  0.00
ATOM    217  N   ASN    16      -2.830   6.052  11.041  1.00  0.00
ATOM    218  H   ASN    16      -2.846   6.846  10.411  1.00  0.00
ATOM    219  CA  ASN    16      -4.102   5.637  11.661  1.00  0.00
ATOM    220  HA  ASN    16      -3.832   5.099  12.563  1.00  0.00
ATOM    221  CB  ASN    16      -4.913   6.869  12.116  1.00  0.00
ATOM    222  HB2 ASN    16      -5.650   6.524  12.842  1.00  0.00
ATOM    223  HB3 ASN    16      -4.272   7.587  12.626  1.00  0.00
ATOM    224  CG  ASN    16      -5.671   7.551  11.001  1.00  0.00
ATOM    225  OD1 ASN    16      -5.531   7.356   9.807  1.00  0.00
ATOM    226  ND2 ASN    16      -6.456   8.486  11.400  1.00  0.00
ATOM    227 HD21 ASN    16      -7.123   8.886  10.746  1.00  0.00
ATOM    228 HD22 ASN    16      -6.559   8.641  12.392  1.00  0.00
ATOM    229  C   ASN    16      -4.966   4.623  10.831  1.00  0.00
ATOM    230  O   ASN    16      -6.200   4.623  10.968  1.00  0.00
ATOM    231  N   THR    17      -4.376   3.868   9.879  1.00  0.00
ATOM    232  H   THR    17      -3.373   3.926   9.779  1.00  0.00
ATOM    233  CA  THR    17      -5.090   2.886   9.015  1.00  0.00
ATOM    234  HA  THR    17      -5.737   2.287   9.655  1.00  0.00
ATOM    235  CB  THR    17      -5.972   3.632   7.979  1.00  0.00
ATOM    236  HB  THR    17      -6.612   4.316   8.531  1.00  0.00
ATOM    237  CG2 THR    17      -5.183   4.489   6.988  1.00  0.00
ATOM    238 HG21 THR    17      -5.856   5.215   6.537  1.00  0.00
ATOM    239 HG22 THR    17      -4.393   5.018   7.518  1.00  0.00
ATOM    240 HG23 THR    17      -4.755   3.878   6.195  1.00  0.00
ATOM    241  OG1 THR    17      -6.828   2.787   7.227  1.00  0.00
ATOM    242  HG1 THR    17      -7.396   2.300   7.851  1.00  0.00
ATOM    243  C   THR    17      -4.116   1.938   8.277  1.00  0.00
ATOM    244  O   THR    17      -2.936   2.248   8.152  1.00  0.00
ATOM    245  N   ASN    18      -4.577   0.789   7.762  1.00  0.00
ATOM    246  H   ASN    18      -5.452   0.478   8.160  1.00  0.00
ATOM    247  CA  ASN    18      -3.795  -0.243   7.035  1.00  0.00
ATOM    248  HA  ASN    18      -2.833   0.188   6.752  1.00  0.00
ATOM    249  CB  ASN    18      -3.544  -1.428   8.014  1.00  0.00
ATOM    250  HB2 ASN    18      -2.801  -2.076   7.565  1.00  0.00
ATOM    251  HB3 ASN    18      -3.132  -1.039   8.942  1.00  0.00
ATOM    252  CG  ASN    18      -4.770  -2.315   8.336  1.00  0.00
ATOM    253  OD1 ASN    18      -5.867  -1.823   8.537  1.00  0.00
ATOM    254  ND2 ASN    18      -4.638  -3.623   8.382  1.00  0.00
ATOM    255 HD21 ASN    18      -5.481  -4.141   8.556  1.00  0.00
ATOM    256 HD22 ASN    18      -3.739  -4.085   8.416  1.00  0.00
ATOM    257  C   ASN    18      -4.432  -0.715   5.716  1.00  0.00
ATOM    258  O   ASN    18      -3.893  -1.612   5.089  1.00  0.00
ATOM    259  N   ALA    19      -5.566  -0.151   5.319  1.00  0.00
ATOM    260  H   ALA    19      -5.996   0.525   5.939  1.00  0.00
ATOM    261  CA  ALA    19      -6.362  -0.551   4.163  1.00  0.00
ATOM    262  HA  ALA    19      -5.713  -0.931   3.374  1.00  0.00
ATOM    263  CB  ALA    19      -7.369  -1.642   4.563  1.00  0.00
ATOM    264  HB1 ALA    19      -6.870  -2.454   5.090  1.00  0.00
ATOM    265  HB2 ALA    19      -8.156  -1.226   5.193  1.00  0.00
ATOM    266  HB3 ALA    19      -7.828  -2.043   3.658  1.00  0.00
ATOM    267  C   ALA    19      -7.120   0.657   3.625  1.00  0.00
ATOM    268  O   ALA    19      -7.510   1.507   4.414  1.00  0.00
ATOM    269  N   ILE    20      -7.418   0.695   2.328  1.00  0.00
ATOM    270  H   ILE    20      -6.958   0.024   1.718  1.00  0.00
ATOM    271  CA  ILE    20      -8.335   1.642   1.665  1.00  0.00
ATOM    272  HA  ILE    20      -9.001   2.086   2.394  1.00  0.00
ATOM    273  CB  ILE    20      -7.559   2.824   1.005  1.00  0.00
ATOM    274  HB  ILE    20      -6.731   2.435   0.408  1.00  0.00
ATOM    275  CG2 ILE    20      -8.510   3.662   0.111  1.00  0.00
ATOM    276 HG21 ILE    20      -9.375   3.988   0.692  1.00  0.00
ATOM    277 HG22 ILE    20      -8.019   4.546  -0.283  1.00  0.00
ATOM    278 HG23 ILE    20      -8.842   3.095  -0.758  1.00  0.00
ATOM    279  CG1 ILE    20      -7.004   3.716   2.137  1.00  0.00
ATOM    280 HG12 ILE    20      -7.825   4.157   2.707  1.00  0.00
ATOM    281 HG13 ILE    20      -6.406   3.114   2.816  1.00  0.00
ATOM    282  CD1 ILE    20      -6.069   4.816   1.637  1.00  0.00
ATOM    283 HD11 ILE    20      -5.183   4.362   1.195  1.00  0.00
ATOM    284 HD12 ILE    20      -6.548   5.459   0.904  1.00  0.00
ATOM    285 HD13 ILE    20      -5.763   5.438   2.478  1.00  0.00
ATOM    286  C   ILE    20      -9.194   0.842   0.660  1.00  0.00
ATOM    287  O   ILE    20      -8.740  -0.153   0.098  1.00  0.00
ATOM    288  N   THR    21     -10.383   1.319   0.289  1.00  0.00
ATOM    289  H   THR    21     -10.763   2.123   0.778  1.00  0.00
ATOM    290  CA  THR    21     -11.191   0.771  -0.817  1.00  0.00
ATOM    291  HA  THR    21     -10.597   0.083  -1.418  1.00  0.00
ATOM    292  CB  THR    21     -12.384  -0.012  -0.263  1.00  0.00
ATOM    293  HB  THR    21     -13.189   0.680  -0.035  1.00  0.00
ATOM    294  CG2 THR    21     -12.849  -1.038  -1.272  1.00  0.00
ATOM    295 HG21 THR    21     -13.786  -1.481  -0.935  1.00  0.00
ATOM    296 HG22 THR    21     -13.016  -0.565  -2.237  1.00  0.00
ATOM    297 HG23 THR    21     -12.090  -1.812  -1.388  1.00  0.00
ATOM    298  OG1 THR    21     -12.008  -0.707   0.895  1.00  0.00
ATOM    299  HG1 THR    21     -12.129  -0.066   1.627  1.00  0.00
ATOM    300  C   THR    21     -11.681   1.932  -1.721  1.00  0.00
ATOM    301  O   THR    21     -11.899   3.041  -1.239  1.00  0.00
ATOM    302  N   VAL    22     -11.936   1.687  -3.013  1.00  0.00
ATOM    303  H   VAL    22     -11.747   0.751  -3.351  1.00  0.00
ATOM    304  CA  VAL    22     -12.522   2.611  -4.030  1.00  0.00
ATOM    305  HA  VAL    22     -13.075   3.409  -3.535  1.00  0.00
ATOM    306  CB  VAL    22     -11.407   3.243  -4.900  1.00  0.00
ATOM    307  HB  VAL    22     -11.031   2.492  -5.597  1.00  0.00
ATOM    308  CG1 VAL    22     -11.917   4.457  -5.697  1.00  0.00
ATOM    309 HG11 VAL    22     -12.771   4.228  -6.327  1.00  0.00
ATOM    310 HG12 VAL    22     -12.169   5.271  -5.017  1.00  0.00
ATOM    311 HG13 VAL    22     -11.116   4.795  -6.349  1.00  0.00
ATOM    312  CG2 VAL    22     -10.224   3.768  -4.043  1.00  0.00
ATOM    313 HG21 VAL    22      -9.806   2.985  -3.413  1.00  0.00
ATOM    314 HG22 VAL    22      -9.421   4.115  -4.691  1.00  0.00
ATOM    315 HG23 VAL    22     -10.555   4.593  -3.411  1.00  0.00
ATOM    316  C   VAL    22     -13.511   1.809  -4.897  1.00  0.00
ATOM    317  O   VAL    22     -13.465   0.577  -4.838  1.00  0.00
ATOM    318  N   ASP    23     -14.396   2.478  -5.663  1.00  0.00
ATOM    319  H   ASP    23     -14.310   3.484  -5.719  1.00  0.00
ATOM    320  CA  ASP    23     -15.525   1.915  -6.440  1.00  0.00
ATOM    321  HA  ASP    23     -15.340   0.861  -6.660  1.00  0.00
ATOM    322  CB  ASP    23     -16.854   2.048  -5.640  1.00  0.00
ATOM    323  HB2 ASP    23     -16.717   1.708  -4.610  1.00  0.00
ATOM    324  HB3 ASP    23     -17.147   3.100  -5.596  1.00  0.00
ATOM    325  CG  ASP    23     -17.981   1.234  -6.310  1.00  0.00
ATOM    326  OD1 ASP    23     -18.278   0.111  -5.841  1.00  0.00
ATOM    327  OD2 ASP    23     -18.633   1.729  -7.267  1.00  0.00
ATOM    328  C   ASP    23     -15.633   2.760  -7.761  1.00  0.00
ATOM    329  O   ASP    23     -15.548   3.991  -7.669  1.00  0.00
ATOM    330  N   LYS    24     -15.838   2.174  -8.967  1.00  0.00
ATOM    331  H   LYS    24     -15.832   1.153  -8.970  1.00  0.00
ATOM    332  CA  LYS    24     -16.204   2.840 -10.274  1.00  0.00
ATOM    333  HA  LYS    24     -15.319   3.320 -10.692  1.00  0.00
ATOM    334  CB  LYS    24     -16.723   1.746 -11.260  1.00  0.00
ATOM    335  HB2 LYS    24     -17.699   1.435 -10.886  1.00  0.00
ATOM    336  HB3 LYS    24     -16.906   2.185 -12.241  1.00  0.00
ATOM    337  CG  LYS    24     -15.868   0.476 -11.450  1.00  0.00
ATOM    338  HG2 LYS    24     -15.014   0.694 -12.083  1.00  0.00
ATOM    339  HG3 LYS    24     -15.471   0.160 -10.495  1.00  0.00
ATOM    340  CD  LYS    24     -16.678  -0.693 -12.041  1.00  0.00
ATOM    341  HD2 LYS    24     -17.697  -0.682 -11.650  1.00  0.00
ATOM    342  HD3 LYS    24     -16.721  -0.587 -13.126  1.00  0.00
ATOM    343  CE  LYS    24     -16.035  -2.041 -11.665  1.00  0.00
ATOM    344  HE2 LYS    24     -14.958  -1.961 -11.839  1.00  0.00
ATOM    345  HE3 LYS    24     -16.185  -2.225 -10.599  1.00  0.00
ATOM    346  NZ  LYS    24     -16.564  -3.175 -12.468  1.00  0.00
ATOM    347  HZ1 LYS    24     -17.535  -3.397 -12.262  1.00  0.00
ATOM    348  HZ2 LYS    24     -16.523  -2.975 -13.463  1.00  0.00
ATOM    349  HZ3 LYS    24     -16.016  -4.013 -12.274  1.00  0.00
ATOM    350  C   LYS    24     -17.314   3.932 -10.196  1.00  0.00
ATOM    351  O   LYS    24     -17.442   4.784 -11.081  1.00  0.00
ATOM    352  N   SER    25     -18.190   3.896  -9.183  1.00  0.00
ATOM    353  H   SER    25     -18.166   3.079  -8.583  1.00  0.00
ATOM    354  CA  SER    25     -19.275   4.888  -9.000  1.00  0.00
ATOM    355  HA  SER    25     -19.942   4.855  -9.862  1.00  0.00
ATOM    356  CB  SER    25     -20.109   4.638  -7.716  1.00  0.00
ATOM    357  HB2 SER    25     -19.456   4.770  -6.854  1.00  0.00
ATOM    358  HB3 SER    25     -20.928   5.355  -7.665  1.00  0.00
ATOM    359  OG  SER    25     -20.662   3.359  -7.581  1.00  0.00
ATOM    360  HG  SER    25     -19.903   2.739  -7.431  1.00  0.00
ATOM    361  C   SER    25     -18.662   6.298  -8.926  1.00  0.00
ATOM    362  O   SER    25     -19.146   7.247  -9.540  1.00  0.00
ATOM    363  N   CYS    26     -17.556   6.425  -8.199  1.00  0.00
ATOM    364  H   CYS    26     -17.204   5.585  -7.760  1.00  0.00
ATOM    365  CA  CYS    26     -16.796   7.648  -7.934  1.00  0.00
ATOM    366  HA  CYS    26     -17.483   8.434  -7.614  1.00  0.00
ATOM    367  CB  CYS    26     -15.772   7.369  -6.812  1.00  0.00
ATOM    368  HB2 CYS    26     -15.115   6.575  -7.160  1.00  0.00
ATOM    369  HB3 CYS    26     -15.158   8.255  -6.643  1.00  0.00
ATOM    370  SG  CYS    26     -16.429   6.795  -5.233  1.00  0.00
ATOM    371  C   CYS    26     -16.039   8.102  -9.190  1.00  0.00
ATOM    372  O   CYS    26     -15.255   7.343  -9.772  1.00  0.00
ATOM    373  N   LYS    27     -16.246   9.333  -9.655  1.00  0.00
ATOM    374  H   LYS    27     -16.854   9.978  -9.157  1.00  0.00
ATOM    375  CA  LYS    27     -15.390   9.807 -10.762  1.00  0.00
ATOM    376  HA  LYS    27     -15.212   8.987 -11.460  1.00  0.00
ATOM    377  CB  LYS    27     -16.087  10.915 -11.574  1.00  0.00
ATOM    378  HB2 LYS    27     -16.361  11.731 -10.903  1.00  0.00
ATOM    379  HB3 LYS    27     -15.380  11.304 -12.310  1.00  0.00
ATOM    380  CG  LYS    27     -17.353  10.440 -12.328  1.00  0.00
ATOM    381  HG2 LYS    27     -17.091   9.583 -12.953  1.00  0.00
ATOM    382  HG3 LYS    27     -18.095  10.112 -11.599  1.00  0.00
ATOM    383  CD  LYS    27     -18.010  11.534 -13.218  1.00  0.00
ATOM    384  HD2 LYS    27     -17.291  11.817 -13.988  1.00  0.00
ATOM    385  HD3 LYS    27     -18.871  11.085 -13.716  1.00  0.00
ATOM    386  CE  LYS    27     -18.477  12.816 -12.470  1.00  0.00
ATOM    387  HE2 LYS    27     -19.142  12.517 -11.654  1.00  0.00
ATOM    388  HE3 LYS    27     -17.600  13.291 -12.019  1.00  0.00
ATOM    389  NZ  LYS    27     -19.188  13.811 -13.333  1.00  0.00
ATOM    390  HZ1 LYS    27     -19.921  13.402 -13.908  1.00  0.00
ATOM    391  HZ2 LYS    27     -19.583  14.560 -12.772  1.00  0.00
ATOM    392  HZ3 LYS    27     -18.517  14.277 -13.927  1.00  0.00
ATOM    393  C   LYS    27     -14.001  10.268 -10.296  1.00  0.00
ATOM    394  O   LYS    27     -13.011  10.017 -11.010  1.00  0.00
ATOM    395  N   GLN    28     -13.970  10.980  -9.160  1.00  0.00
ATOM    396  H   GLN    28     -14.845  11.095  -8.654  1.00  0.00
ATOM    397  CA  GLN    28     -12.757  11.443  -8.487  1.00  0.00
ATOM    398  HA  GLN    28     -11.886  10.938  -8.908  1.00  0.00
ATOM    399  CB  GLN    28     -12.500  12.972  -8.604  1.00  0.00
ATOM    400  HB2 GLN    28     -13.377  13.519  -8.261  1.00  0.00
ATOM    401  HB3 GLN    28     -11.672  13.223  -7.940  1.00  0.00
ATOM    402  CG  GLN    28     -12.124  13.427 -10.004  1.00  0.00
ATOM    403  HG2 GLN    28     -11.823  12.551 -10.578  1.00  0.00
ATOM    404  HG3 GLN    28     -13.017  13.830 -10.470  1.00  0.00
ATOM    405  CD  GLN    28     -11.004  14.480 -10.117  1.00  0.00
ATOM    406  OE1 GLN    28     -10.768  15.427  -9.348  1.00  0.00
ATOM    407  NE2 GLN    28     -10.328  14.427 -11.234  1.00  0.00
ATOM    408 HE21 GLN    28      -9.598  15.125 -11.346  1.00  0.00
ATOM    409 HE22 GLN    28     -10.536  13.725 -11.943  1.00  0.00
ATOM    410  C   GLN    28     -12.882  11.026  -7.019  1.00  0.00
ATOM    411  O   GLN    28     -13.966  10.636  -6.541  1.00  0.00
ATOM    412  N   PHE    29     -11.733  11.105  -6.334  1.00  0.00
ATOM    413  H   PHE    29     -10.899  11.401  -6.832  1.00  0.00
ATOM    414  CA  PHE    29     -11.539  10.672  -4.947  1.00  0.00
ATOM    415  HA  PHE    29     -12.484  10.745  -4.426  1.00  0.00
ATOM    416  CB  PHE    29     -11.099   9.211  -5.007  1.00  0.00
ATOM    417  HB2 PHE    29     -11.832   8.704  -5.614  1.00  0.00
ATOM    418  HB3 PHE    29     -10.135   9.158  -5.517  1.00  0.00
ATOM    419  CG  PHE    29     -11.029   8.406  -3.734  1.00  0.00
ATOM    420  CD1 PHE    29     -12.173   7.718  -3.282  1.00  0.00
ATOM    421  HD1 PHE    29     -13.100   7.796  -3.830  1.00  0.00
ATOM    422  CE1 PHE    29     -12.082   6.898  -2.146  1.00  0.00
ATOM    423  HE1 PHE    29     -12.946   6.347  -1.799  1.00  0.00
ATOM    424  CZ  PHE    29     -10.841   6.744  -1.496  1.00  0.00
ATOM    425  HZ  PHE    29     -10.769   6.092  -0.636  1.00  0.00
ATOM    426  CE2 PHE    29      -9.675   7.331  -2.020  1.00  0.00
ATOM    427  HE2 PHE    29      -8.716   7.141  -1.559  1.00  0.00
ATOM    428  CD2 PHE    29      -9.775   8.163  -3.145  1.00  0.00
ATOM    429  HD2 PHE    29      -8.894   8.626  -3.547  1.00  0.00
ATOM    430  C   PHE    29     -10.514  11.538  -4.216  1.00  0.00
ATOM    431  O   PHE    29      -9.663  12.144  -4.858  1.00  0.00
ATOM    432  N   THR    30     -10.565  11.606  -2.892  1.00  0.00
ATOM    433  H   THR    30     -11.234  11.041  -2.386  1.00  0.00
ATOM    434  CA  THR    30      -9.744  12.556  -2.138  1.00  0.00
ATOM    435  HA  THR    30      -8.850  12.791  -2.704  1.00  0.00
ATOM    436  CB  THR    30     -10.479  13.873  -1.856  1.00  0.00
ATOM    437  HB  THR    30     -11.357  13.655  -1.246  1.00  0.00
ATOM    438  CG2 THR    30      -9.662  14.934  -1.146  1.00  0.00
ATOM    439 HG21 THR    30      -8.657  15.025  -1.552  1.00  0.00
ATOM    440 HG22 THR    30     -10.182  15.891  -1.205  1.00  0.00
ATOM    441 HG23 THR    30      -9.588  14.655  -0.096  1.00  0.00
ATOM    442  OG1 THR    30     -10.914  14.489  -3.056  1.00  0.00
ATOM    443  HG1 THR    30     -11.675  13.963  -3.362  1.00  0.00
ATOM    444  C   THR    30      -9.302  11.912  -0.853  1.00  0.00
ATOM    445  O   THR    30     -10.016  11.118  -0.245  1.00  0.00
ATOM    446  N   VAL    31      -8.070  12.218  -0.478  1.00  0.00
ATOM    447  H   VAL    31      -7.543  12.858  -1.066  1.00  0.00
ATOM    448  CA  VAL    31      -7.323  11.518   0.547  1.00  0.00
ATOM    449  HA  VAL    31      -7.996  10.947   1.184  1.00  0.00
ATOM    450  CB  VAL    31      -6.393  10.537  -0.161  1.00  0.00
ATOM    451  HB  VAL    31      -5.733  11.068  -0.848  1.00  0.00
ATOM    452  CG1 VAL    31      -5.566   9.825   0.895  1.00  0.00
ATOM    453 HG11 VAL    31      -4.714  10.448   1.168  1.00  0.00
ATOM    454 HG12 VAL    31      -6.161   9.612   1.783  1.00  0.00
ATOM    455 HG13 VAL    31      -5.214   8.883   0.500  1.00  0.00
ATOM    456  CG2 VAL    31      -7.203   9.504  -0.961  1.00  0.00
ATOM    457 HG21 VAL    31      -7.827   9.972  -1.718  1.00  0.00
ATOM    458 HG22 VAL    31      -6.518   8.843  -1.485  1.00  0.00
ATOM    459 HG23 VAL    31      -7.820   8.911  -0.293  1.00  0.00
ATOM    460  C   VAL    31      -6.608  12.573   1.393  1.00  0.00
ATOM    461  O   VAL    31      -5.790  13.347   0.902  1.00  0.00
ATOM    462  N   ASN    32      -7.011  12.664   2.654  1.00  0.00
ATOM    463  H   ASN    32      -7.657  11.945   2.972  1.00  0.00
ATOM    464  CA  ASN    32      -6.897  13.848   3.503  1.00  0.00
ATOM    465  HA  ASN    32      -6.367  14.644   2.977  1.00  0.00
ATOM    466  CB  ASN    32      -8.355  14.320   3.777  1.00  0.00
ATOM    467  HB2 ASN    32      -8.891  14.403   2.831  1.00  0.00
ATOM    468  HB3 ASN    32      -8.864  13.566   4.371  1.00  0.00
ATOM    469  CG  ASN    32      -8.498  15.662   4.470  1.00  0.00
ATOM    470  OD1 ASN    32      -8.101  16.676   3.935  1.00  0.00
ATOM    471  ND2 ASN    32      -9.082  15.730   5.638  1.00  0.00
ATOM    472 HD21 ASN    32      -9.363  16.631   5.993  1.00  0.00
ATOM    473 HD22 ASN    32      -9.376  14.878   6.109  1.00  0.00
ATOM    474  C   ASN    32      -6.073  13.459   4.741  1.00  0.00
ATOM    475  O   ASN    32      -6.638  12.875   5.671  1.00  0.00
ATOM    476  N   LEU    33      -4.764  13.789   4.701  1.00  0.00
ATOM    477  H   LEU    33      -4.460  14.366   3.922  1.00  0.00
ATOM    478  CA  LEU    33      -3.686  13.460   5.653  1.00  0.00
ATOM    479  HA  LEU    33      -3.912  12.506   6.096  1.00  0.00
ATOM    480  CB  LEU    33      -2.368  13.305   4.873  1.00  0.00
ATOM    481  HB2 LEU    33      -2.525  12.628   4.032  1.00  0.00
ATOM    482  HB3 LEU    33      -2.101  14.283   4.478  1.00  0.00
ATOM    483  CG  LEU    33      -1.163  12.817   5.705  1.00  0.00
ATOM    484  HG  LEU    33      -1.041  13.449   6.577  1.00  0.00
ATOM    485  CD1 LEU    33      -1.381  11.397   6.193  1.00  0.00
ATOM    486 HD11 LEU    33      -0.476  11.030   6.673  1.00  0.00
ATOM    487 HD12 LEU    33      -2.188  11.376   6.923  1.00  0.00
ATOM    488 HD13 LEU    33      -1.635  10.751   5.352  1.00  0.00
ATOM    489  CD2 LEU    33       0.182  12.884   4.987  1.00  0.00
ATOM    490 HD21 LEU    33       0.344  13.892   4.605  1.00  0.00
ATOM    491 HD22 LEU    33       0.983  12.646   5.686  1.00  0.00
ATOM    492 HD23 LEU    33       0.197  12.179   4.158  1.00  0.00
ATOM    493  C   LEU    33      -3.497  14.546   6.734  1.00  0.00
ATOM    494  O   LEU    33      -3.753  15.718   6.480  1.00  0.00
ATOM    495  N   SER    34      -2.996  14.185   7.922  1.00  0.00
ATOM    496  H   SER    34      -2.796  13.206   8.060  1.00  0.00
ATOM    497  CA  SER    34      -2.587  15.114   8.997  1.00  0.00
ATOM    498  HA  SER    34      -2.070  15.955   8.551  1.00  0.00
ATOM    499  CB  SER    34      -3.858  15.614   9.686  1.00  0.00
ATOM    500  HB2 SER    34      -4.424  16.204   8.965  1.00  0.00
ATOM    501  HB3 SER    34      -4.463  14.743   9.942  1.00  0.00
ATOM    502  OG  SER    34      -3.679  16.384  10.862  1.00  0.00
ATOM    503  HG  SER    34      -4.567  16.432  11.282  1.00  0.00
ATOM    504  C   SER    34      -1.588  14.507   9.987  1.00  0.00
ATOM    505  O   SER    34      -1.363  13.291  10.007  1.00  0.00
ATOM    506  N   HIS    35      -0.959  15.349  10.809  1.00  0.00
ATOM    507  H   HIS    35      -1.169  16.344  10.735  1.00  0.00
ATOM    508  CA  HIS    35       0.037  14.882  11.772  1.00  0.00
ATOM    509  HA  HIS    35      -0.076  13.811  11.903  1.00  0.00
ATOM    510  CB  HIS    35       1.413  15.132  11.126  1.00  0.00
ATOM    511  HB2 HIS    35       1.390  14.792  10.089  1.00  0.00
ATOM    512  HB3 HIS    35       1.524  16.207  11.096  1.00  0.00
ATOM    513  CG  HIS    35       2.654  14.558  11.772  1.00  0.00
ATOM    514  ND1 HIS    35       2.906  14.467  13.128  1.00  0.00
ATOM    515  HD1 HIS    35       2.211  14.575  13.870  1.00  0.00
ATOM    516  CE1 HIS    35       4.225  14.249  13.295  1.00  0.00
ATOM    517  HE1 HIS    35       4.739  14.154  14.251  1.00  0.00
ATOM    518  NE2 HIS    35       4.793  14.132  12.080  1.00  0.00
ATOM    519  HE2 HIS    35       5.783  13.943  11.907  1.00  0.00
ATOM    520  CD2 HIS    35       3.829  14.317  11.112  1.00  0.00
ATOM    521  HD2 HIS    35       3.996  14.407  10.043  1.00  0.00
ATOM    522  C   HIS    35      -0.186  15.504  13.177  1.00  0.00
ATOM    523  O   HIS    35       0.598  16.362  13.598  1.00  0.00
ATOM    524  N   PRO    36      -1.250  15.150  13.939  1.00  0.00
ATOM    525  CD  PRO    36      -2.468  14.473  13.505  1.00  0.00
ATOM    526  HD2 PRO    36      -2.223  13.457  13.192  1.00  0.00
ATOM    527  HD3 PRO    36      -2.965  15.002  12.698  1.00  0.00
ATOM    528  CG  PRO    36      -3.377  14.423  14.730  1.00  0.00
ATOM    529  HG2 PRO    36      -4.021  13.544  14.708  1.00  0.00
ATOM    530  HG3 PRO    36      -3.977  15.333  14.773  1.00  0.00
ATOM    531  CB  PRO    36      -2.407  14.379  15.914  1.00  0.00
ATOM    532  HB2 PRO    36      -2.152  13.341  16.103  1.00  0.00
ATOM    533  HB3 PRO    36      -2.840  14.815  16.811  1.00  0.00
ATOM    534  CA  PRO    36      -1.162  15.145  15.418  1.00  0.00
ATOM    535  HA  PRO    36      -1.239  16.172  15.767  1.00  0.00
ATOM    536  C   PRO    36       0.198  14.569  15.931  1.00  0.00
ATOM    537  O   PRO    36       0.938  13.880  15.215  1.00  0.00
ATOM    538  N   GLY    37       0.618  14.913  17.146  1.00  0.00
ATOM    539  H   GLY    37      -0.037  15.392  17.755  1.00  0.00
ATOM    540  CA  GLY    37       1.995  14.751  17.662  1.00  0.00
ATOM    541  HA2 GLY    37       1.955  14.320  18.662  1.00  0.00
ATOM    542  HA3 GLY    37       2.535  14.060  17.019  1.00  0.00
ATOM    543  C   GLY    37       2.807  16.061  17.759  1.00  0.00
ATOM    544  O   GLY    37       2.225  17.151  17.732  1.00  0.00
ATOM    545  N   ASN    38       4.139  15.968  17.875  1.00  0.00
ATOM    546  H   ASN    38       4.509  15.016  17.872  1.00  0.00
ATOM    547  CA  ASN    38       5.062  17.058  18.216  1.00  0.00
ATOM    548  HA  ASN    38       4.554  18.012  18.070  1.00  0.00
ATOM    549  CB  ASN    38       5.428  16.976  19.711  1.00  0.00
ATOM    550  HB2 ASN    38       5.934  16.041  19.948  1.00  0.00
ATOM    551  HB3 ASN    38       6.080  17.808  19.942  1.00  0.00
ATOM    552  CG  ASN    38       4.218  17.171  20.616  1.00  0.00
ATOM    553  OD1 ASN    38       3.610  16.257  21.173  1.00  0.00
ATOM    554  ND2 ASN    38       3.803  18.396  20.761  1.00  0.00
ATOM    555 HD21 ASN    38       2.894  18.550  21.174  1.00  0.00
ATOM    556 HD22 ASN    38       4.303  19.163  20.342  1.00  0.00
ATOM    557  C   ASN    38       6.328  17.113  17.330  1.00  0.00
ATOM    558  O   ASN    38       7.153  18.012  17.523  1.00  0.00
ATOM    559  N   LEU    39       6.583  16.183  16.403  1.00  0.00
ATOM    560  H   LEU    39       5.932  15.416  16.260  1.00  0.00
ATOM    561  CA  LEU    39       7.899  16.140  15.739  1.00  0.00
ATOM    562  HA  LEU    39       8.591  16.708  16.344  1.00  0.00
ATOM    563  CB  LEU    39       8.362  14.696  15.803  1.00  0.00
ATOM    564  HB2 LEU    39       7.606  14.102  15.288  1.00  0.00
ATOM    565  HB3 LEU    39       9.308  14.622  15.269  1.00  0.00
ATOM    566  CG  LEU    39       8.559  14.092  17.200  1.00  0.00
ATOM    567  HG  LEU    39       7.648  14.173  17.791  1.00  0.00
ATOM    568  CD1 LEU    39       8.951  12.620  17.056  1.00  0.00
ATOM    569 HD11 LEU    39       9.958  12.531  16.647  1.00  0.00
ATOM    570 HD12 LEU    39       8.911  12.135  18.031  1.00  0.00
ATOM    571 HD13 LEU    39       8.238  12.124  16.405  1.00  0.00
ATOM    572  CD2 LEU    39       9.697  14.831  17.893  1.00  0.00
ATOM    573 HD21 LEU    39       9.473  15.890  17.995  1.00  0.00
ATOM    574 HD22 LEU    39       9.834  14.437  18.899  1.00  0.00
ATOM    575 HD23 LEU    39      10.624  14.713  17.333  1.00  0.00
ATOM    576  C   LEU    39       8.003  16.705  14.295  1.00  0.00
ATOM    577  O   LEU    39       7.117  16.484  13.461  1.00  0.00
ATOM    578  N   PRO    40       9.101  17.413  13.966  1.00  0.00
ATOM    579  CD  PRO    40      10.175  17.782  14.888  1.00  0.00
ATOM    580  HD2 PRO    40      10.768  16.923  15.207  1.00  0.00
ATOM    581  HD3 PRO    40       9.757  18.297  15.754  1.00  0.00
ATOM    582  CG  PRO    40      11.030  18.763  14.124  1.00  0.00
ATOM    583  HG2 PRO    40      11.774  18.202  13.563  1.00  0.00
ATOM    584  HG3 PRO    40      11.502  19.480  14.794  1.00  0.00
ATOM    585  CB  PRO    40      10.038  19.428  13.167  1.00  0.00
ATOM    586  HB2 PRO    40      10.552  19.826  12.292  1.00  0.00
ATOM    587  HB3 PRO    40       9.492  20.216  13.685  1.00  0.00
ATOM    588  CA  PRO    40       9.081  18.296  12.800  1.00  0.00
ATOM    589  HA  PRO    40       8.079  18.700  12.637  1.00  0.00
ATOM    590  C   PRO    40       9.527  17.527  11.559  1.00  0.00
ATOM    591  O   PRO    40      10.095  16.432  11.678  1.00  0.00
ATOM    592  N   LYS    41       9.233  18.064  10.368  1.00  0.00
ATOM    593  H   LYS    41       8.854  19.008  10.358  1.00  0.00
ATOM    594  CA  LYS    41       9.509  17.430   9.075  1.00  0.00
ATOM    595  HA  LYS    41       8.768  16.650   8.942  1.00  0.00
ATOM    596  CB  LYS    41       9.325  18.441   7.924  1.00  0.00
ATOM    597  HB2 LYS    41       8.408  19.016   8.061  1.00  0.00
ATOM    598  HB3 LYS    41      10.169  19.132   7.957  1.00  0.00
ATOM    599  CG  LYS    41       9.295  17.760   6.541  1.00  0.00
ATOM    600  HG2 LYS    41      10.006  16.936   6.503  1.00  0.00
ATOM    601  HG3 LYS    41       8.297  17.370   6.330  1.00  0.00
ATOM    602  CD  LYS    41       9.715  18.771   5.466  1.00  0.00
ATOM    603  HD2 LYS    41      10.696  19.182   5.702  1.00  0.00
ATOM    604  HD3 LYS    41       9.800  18.192   4.560  1.00  0.00
ATOM    605  CE  LYS    41       8.728  19.932   5.237  1.00  0.00
ATOM    606  HE2 LYS    41       7.711  19.535   5.172  1.00  0.00
ATOM    607  HE3 LYS    41       8.780  20.632   6.077  1.00  0.00
ATOM    608  NZ  LYS    41       9.057  20.639   3.983  1.00  0.00
ATOM    609  HZ1 LYS    41       9.193  19.978   3.220  1.00  0.00
ATOM    610  HZ2 LYS    41       8.344  21.312   3.720  1.00  0.00
ATOM    611  HZ3 LYS    41       9.922  21.156   4.104  1.00  0.00
ATOM    612  C   LYS    41      10.885  16.738   8.996  1.00  0.00
ATOM    613  O   LYS    41      10.889  15.624   8.481  1.00  0.00
ATOM    614  N   ASN    42      11.997  17.342   9.481  1.00  0.00
ATOM    615  H   ASN    42      11.856  18.222   9.957  1.00  0.00
ATOM    616  CA  ASN    42      13.404  16.873   9.388  1.00  0.00
ATOM    617  HA  ASN    42      13.613  16.716   8.330  1.00  0.00
ATOM    618  CB  ASN    42      14.380  17.979   9.856  1.00  0.00
ATOM    619  HB2 ASN    42      15.382  17.617   9.635  1.00  0.00
ATOM    620  HB3 ASN    42      14.218  18.873   9.254  1.00  0.00
ATOM    621  CG  ASN    42      14.323  18.382  11.322  1.00  0.00
ATOM    622  OD1 ASN    42      13.339  18.933  11.787  1.00  0.00
ATOM    623  ND2 ASN    42      15.359  18.144  12.095  1.00  0.00
ATOM    624 HD21 ASN    42      15.353  18.580  13.001  1.00  0.00
ATOM    625 HD22 ASN    42      16.217  17.779  11.682  1.00  0.00
ATOM    626  C   ASN    42      13.753  15.533  10.039  1.00  0.00
ATOM    627  O   ASN    42      14.738  14.899   9.654  1.00  0.00
ATOM    628  N   VAL    43      12.935  15.078  10.985  1.00  0.00
ATOM    629  H   VAL    43      12.130  15.644  11.224  1.00  0.00
ATOM    630  CA  VAL    43      13.164  13.818  11.705  1.00  0.00
ATOM    631  HA  VAL    43      13.987  13.276  11.238  1.00  0.00
ATOM    632  CB  VAL    43      13.561  14.049  13.173  1.00  0.00
ATOM    633  HB  VAL    43      13.666  13.076  13.655  1.00  0.00
ATOM    634  CG1 VAL    43      14.913  14.761  13.279  1.00  0.00
ATOM    635 HG11 VAL    43      15.670  14.191  12.740  1.00  0.00
ATOM    636 HG12 VAL    43      14.849  15.756  12.853  1.00  0.00
ATOM    637 HG13 VAL    43      15.214  14.846  14.324  1.00  0.00
ATOM    638  CG2 VAL    43      12.519  14.861  13.951  1.00  0.00
ATOM    639 HG21 VAL    43      11.571  14.331  14.003  1.00  0.00
ATOM    640 HG22 VAL    43      12.869  15.026  14.971  1.00  0.00
ATOM    641 HG23 VAL    43      12.369  15.832  13.480  1.00  0.00
ATOM    642  C   VAL    43      11.983  12.879  11.625  1.00  0.00
ATOM    643  O   VAL    43      12.179  11.689  11.427  1.00  0.00
ATOM    644  N   MET    44      10.761  13.399  11.689  1.00  0.00
ATOM    645  H   MET    44      10.667  14.403  11.805  1.00  0.00
ATOM    646  CA  MET    44       9.552  12.585  11.787  1.00  0.00
ATOM    647  HA  MET    44       9.726  11.638  11.276  1.00  0.00
ATOM    648  CB  MET    44       9.277  12.271  13.275  1.00  0.00
ATOM    649  HB2 MET    44      10.219  12.035  13.772  1.00  0.00
ATOM    650  HB3 MET    44       8.896  13.179  13.722  1.00  0.00
ATOM    651  CG  MET    44       8.284  11.133  13.597  1.00  0.00
ATOM    652  HG2 MET    44       8.331  10.953  14.667  1.00  0.00
ATOM    653  HG3 MET    44       7.278  11.489  13.377  1.00  0.00
ATOM    654  SD  MET    44       8.448   9.511  12.813  1.00  0.00
ATOM    655  CE  MET    44      10.195   9.093  13.097  1.00  0.00
ATOM    656  HE1 MET    44      10.334   8.751  14.122  1.00  0.00
ATOM    657  HE2 MET    44      10.488   8.300  12.409  1.00  0.00
ATOM    658  HE3 MET    44      10.827   9.960  12.913  1.00  0.00
ATOM    659  C   MET    44       8.396  13.275  11.052  1.00  0.00
ATOM    660  O   MET    44       7.286  13.279  11.551  1.00  0.00
ATOM    661  N   GLY    45       8.604  13.921   9.882  1.00  0.00
ATOM    662  H   GLY    45       9.554  13.912   9.495  1.00  0.00
ATOM    663  CA  GLY    45       7.559  14.354   9.017  1.00  0.00
ATOM    664  HA2 GLY    45       6.839  15.008   9.560  1.00  0.00
ATOM    665  HA3 GLY    45       8.005  14.958   8.200  1.00  0.00
ATOM    666  C   GLY    45       6.879  13.187   8.315  1.00  0.00
ATOM    667  O   GLY    45       7.512  12.159   8.014  1.00  0.00
ATOM    668  N   HIS    46       5.581  13.364   7.929  1.00  0.00
ATOM    669  H   HIS    46       5.144  14.294   8.015  1.00  0.00
ATOM    670  CA  HIS    46       4.983  12.320   6.993  1.00  0.00
ATOM    671  HA  HIS    46       5.890  11.869   6.570  1.00  0.00
ATOM    672  CB  HIS    46       4.180  11.185   7.706  1.00  0.00
ATOM    673  HB2 HIS    46       3.195  11.568   8.015  1.00  0.00
ATOM    674  HB3 HIS    46       3.988  10.373   6.981  1.00  0.00
ATOM    675  CG  HIS    46       4.847  10.592   8.906  1.00  0.00
ATOM    676  ND1 HIS    46       5.891   9.668   8.857  1.00  0.00
ATOM    677  CE1 HIS    46       6.186   9.355  10.127  1.00  0.00
ATOM    678  HE1 HIS    46       6.941   8.648  10.449  1.00  0.00
ATOM    679  NE2 HIS    46       5.382  10.025  10.971  1.00  0.00
ATOM    680  HE2 HIS    46       5.314   9.899  11.992  1.00  0.00
ATOM    681  CD2 HIS    46       4.519  10.794  10.223  1.00  0.00
ATOM    682  HD2 HIS    46       3.786  11.451  10.680  1.00  0.00
ATOM    683  C   HIS    46       4.312  12.663   5.580  1.00  0.00
ATOM    684  O   HIS    46       3.862  13.791   5.488  1.00  0.00
ATOM    685  N   ASN    47       4.235  11.702   4.666  1.00  0.00
ATOM    686  H   ASN    47       4.655  10.802   4.860  1.00  0.00
ATOM    687  CA  ASN    47       3.462  11.808   3.440  1.00  0.00
ATOM    688  HA  ASN    47       2.822  12.688   3.514  1.00  0.00
ATOM    689  CB  ASN    47       4.459  12.061   2.285  1.00  0.00
ATOM    690  HB2 ASN    47       3.906  12.212   1.359  1.00  0.00
ATOM    691  HB3 ASN    47       4.995  12.987   2.487  1.00  0.00
ATOM    692  CG  ASN    47       5.488  10.961   2.037  1.00  0.00
ATOM    693  OD1 ASN    47       5.292   9.794   2.320  1.00  0.00
ATOM    694  ND2 ASN    47       6.629  11.259   1.469  1.00  0.00
ATOM    695 HD21 ASN    47       7.194  10.478   1.156  1.00  0.00
ATOM    696 HD22 ASN    47       6.848  12.170   1.092  1.00  0.00
ATOM    697  C   ASN    47       2.493  10.607   3.249  1.00  0.00
ATOM    698  O   ASN    47       2.476   9.670   4.053  1.00  0.00
ATOM    699  N   TRP    48       1.654  10.659   2.208  1.00  0.00
ATOM    700  H   TRP    48       1.600  11.533   1.696  1.00  0.00
ATOM    701  CA  TRP    48       0.749   9.586   1.776  1.00  0.00
ATOM    702  HA  TRP    48       1.042   8.656   2.266  1.00  0.00
ATOM    703  CB  TRP    48      -0.696   9.887   2.212  1.00  0.00
ATOM    704  HB2 TRP    48      -0.713   9.945   3.301  1.00  0.00
ATOM    705  HB3 TRP    48      -1.008  10.848   1.834  1.00  0.00
ATOM    706  CG  TRP    48      -1.689   8.855   1.780  1.00  0.00
ATOM    707  CD1 TRP    48      -1.956   7.754   2.512  1.00  0.00
ATOM    708  HD1 TRP    48      -1.525   7.543   3.484  1.00  0.00
ATOM    709  NE1 TRP    48      -2.782   6.909   1.806  1.00  0.00
ATOM    710  HE1 TRP    48      -3.102   6.015   2.157  1.00  0.00
ATOM    711  CE2 TRP    48      -3.042   7.399   0.550  1.00  0.00
ATOM    712  CZ2 TRP    48      -3.805   6.892  -0.507  1.00  0.00
ATOM    713  HZ2 TRP    48      -4.251   5.913  -0.440  1.00  0.00
ATOM    714  CH2 TRP    48      -4.018   7.706  -1.631  1.00  0.00
ATOM    715  HH2 TRP    48      -4.642   7.358  -2.436  1.00  0.00
ATOM    716  CZ3 TRP    48      -3.448   8.989  -1.704  1.00  0.00
ATOM    717  HZ3 TRP    48      -3.607   9.598  -2.583  1.00  0.00
ATOM    718  CE3 TRP    48      -2.672   9.482  -0.633  1.00  0.00
ATOM    719  HE3 TRP    48      -2.229  10.464  -0.694  1.00  0.00
ATOM    720  CD2 TRP    48      -2.444   8.699   0.527  1.00  0.00
ATOM    721  C   TRP    48       0.889   9.364   0.261  1.00  0.00
ATOM    722  O   TRP    48       0.472  10.199  -0.543  1.00  0.00
ATOM    723  N   VAL    49       1.531   8.256  -0.125  1.00  0.00
ATOM    724  H   VAL    49       1.871   7.629   0.599  1.00  0.00
ATOM    725  CA  VAL    49       2.002   7.963  -1.494  1.00  0.00
ATOM    726  HA  VAL    49       1.758   8.804  -2.141  1.00  0.00
ATOM    727  CB  VAL    49       3.545   7.803  -1.476  1.00  0.00
ATOM    728  HB  VAL    49       3.810   6.888  -0.947  1.00  0.00
ATOM    729  CG1 VAL    49       4.099   7.703  -2.901  1.00  0.00
ATOM    730 HG11 VAL    49       3.939   8.638  -3.436  1.00  0.00
ATOM    731 HG12 VAL    49       5.167   7.491  -2.858  1.00  0.00
ATOM    732 HG13 VAL    49       3.621   6.884  -3.438  1.00  0.00
ATOM    733  CG2 VAL    49       4.247   8.988  -0.782  1.00  0.00
ATOM    734 HG21 VAL    49       4.070   8.930   0.290  1.00  0.00
ATOM    735 HG22 VAL    49       5.320   8.968  -0.947  1.00  0.00
ATOM    736 HG23 VAL    49       3.858   9.932  -1.162  1.00  0.00
ATOM    737  C   VAL    49       1.315   6.708  -2.078  1.00  0.00
ATOM    738  O   VAL    49       1.268   5.674  -1.414  1.00  0.00
ATOM    739  N   LEU    50       0.791   6.773  -3.316  1.00  0.00
ATOM    740  H   LEU    50       0.783   7.672  -3.785  1.00  0.00
ATOM    741  CA  LEU    50      -0.001   5.690  -3.944  1.00  0.00
ATOM    742  HA  LEU    50      -0.070   4.847  -3.254  1.00  0.00
ATOM    743  CB  LEU    50      -1.423   6.285  -4.122  1.00  0.00
ATOM    744  HB2 LEU    50      -1.800   6.589  -3.144  1.00  0.00
ATOM    745  HB3 LEU    50      -1.350   7.177  -4.741  1.00  0.00
ATOM    746  CG  LEU    50      -2.458   5.361  -4.788  1.00  0.00
ATOM    747  HG  LEU    50      -2.135   5.169  -5.803  1.00  0.00
ATOM    748  CD1 LEU    50      -2.592   4.003  -4.112  1.00  0.00
ATOM    749 HD11 LEU    50      -1.672   3.432  -4.219  1.00  0.00
ATOM    750 HD12 LEU    50      -2.819   4.137  -3.056  1.00  0.00
ATOM    751 HD13 LEU    50      -3.390   3.434  -4.588  1.00  0.00
ATOM    752  CD2 LEU    50      -3.863   5.969  -4.864  1.00  0.00
ATOM    753 HD21 LEU    50      -4.354   5.896  -3.899  1.00  0.00
ATOM    754 HD22 LEU    50      -3.811   7.008  -5.189  1.00  0.00
ATOM    755 HD23 LEU    50      -4.456   5.407  -5.587  1.00  0.00
ATOM    756  C   LEU    50       0.604   5.152  -5.286  1.00  0.00
ATOM    757  O   LEU    50       0.826   5.949  -6.200  1.00  0.00
ATOM    758  N   SER    51       0.799   3.824  -5.474  1.00  0.00
ATOM    759  H   SER    51       0.601   3.194  -4.702  1.00  0.00
ATOM    760  CA  SER    51       1.095   3.175  -6.803  1.00  0.00
ATOM    761  HA  SER    51       0.737   3.834  -7.590  1.00  0.00
ATOM    762  CB  SER    51       2.613   3.024  -7.031  1.00  0.00
ATOM    763  HB2 SER    51       2.809   2.781  -8.074  1.00  0.00
ATOM    764  HB3 SER    51       3.112   3.967  -6.806  1.00  0.00
ATOM    765  OG  SER    51       3.136   2.013  -6.200  1.00  0.00
ATOM    766  HG  SER    51       2.778   1.147  -6.458  1.00  0.00
ATOM    767  C   SER    51       0.375   1.809  -7.004  1.00  0.00
ATOM    768  O   SER    51      -0.365   1.377  -6.117  1.00  0.00
ATOM    769  N   THR    52       0.631   1.063  -8.097  1.00  0.00
ATOM    770  H   THR    52       1.126   1.474  -8.883  1.00  0.00
ATOM    771  CA  THR    52       0.360  -0.394  -8.162  1.00  0.00
ATOM    772  HA  THR    52      -0.685  -0.572  -7.917  1.00  0.00
ATOM    773  CB  THR    52       0.618  -0.969  -9.562  1.00  0.00
ATOM    774  HB  THR    52       0.399  -2.038  -9.553  1.00  0.00
ATOM    775  CG2 THR    52      -0.245  -0.318 -10.651  1.00  0.00
ATOM    776 HG21 THR    52       0.059   0.709 -10.830  1.00  0.00
ATOM    777 HG22 THR    52      -0.169  -0.845 -11.591  1.00  0.00
ATOM    778 HG23 THR    52      -1.288  -0.338 -10.345  1.00  0.00
ATOM    779  OG1 THR    52       1.982  -0.782  -9.811  1.00  0.00
ATOM    780  HG1 THR    52       2.129  -1.004 -10.749  1.00  0.00
ATOM    781  C   THR    52       1.228  -1.184  -7.178  1.00  0.00
ATOM    782  O   THR    52       2.295  -0.702  -6.765  1.00  0.00
ATOM    783  N   ALA    53       0.791  -2.411  -6.838  1.00  0.00
ATOM    784  H   ALA    53      -0.119  -2.705  -7.179  1.00  0.00
ATOM    785  CA  ALA    53       1.599  -3.421  -6.160  1.00  0.00
ATOM    786  HA  ALA    53       2.026  -2.957  -5.269  1.00  0.00
ATOM    787  CB  ALA    53       0.745  -4.616  -5.689  1.00  0.00
ATOM    788  HB1 ALA    53       0.259  -5.068  -6.554  1.00  0.00
ATOM    789  HB2 ALA    53       1.373  -5.367  -5.205  1.00  0.00
ATOM    790  HB3 ALA    53      -0.015  -4.277  -4.986  1.00  0.00
ATOM    791  C   ALA    53       2.804  -3.868  -7.008  1.00  0.00
ATOM    792  O   ALA    53       3.745  -4.312  -6.363  1.00  0.00
ATOM    793  N   ALA    54       2.855  -3.643  -8.342  1.00  0.00
ATOM    794  H   ALA    54       2.039  -3.244  -8.778  1.00  0.00
ATOM    795  CA  ALA    54       4.006  -3.851  -9.228  1.00  0.00
ATOM    796  HA  ALA    54       4.495  -4.784  -8.945  1.00  0.00
ATOM    797  CB  ALA    54       3.510  -3.968 -10.676  1.00  0.00
ATOM    798  HB1 ALA    54       4.314  -4.354 -11.302  1.00  0.00
ATOM    799  HB2 ALA    54       2.666  -4.650 -10.741  1.00  0.00
ATOM    800  HB3 ALA    54       3.209  -2.994 -11.062  1.00  0.00
ATOM    801  C   ALA    54       5.043  -2.710  -9.164  1.00  0.00
ATOM    802  O   ALA    54       6.135  -2.814  -9.717  1.00  0.00
ATOM    803  N   ASP    55       4.707  -1.590  -8.533  1.00  0.00
ATOM    804  H   ASP    55       3.795  -1.555  -8.101  1.00  0.00
ATOM    805  CA  ASP    55       5.448  -0.326  -8.662  1.00  0.00
ATOM    806  HA  ASP    55       6.331  -0.482  -9.280  1.00  0.00
ATOM    807  CB  ASP    55       4.598   0.748  -9.371  1.00  0.00
ATOM    808  HB2 ASP    55       3.668   0.895  -8.825  1.00  0.00
ATOM    809  HB3 ASP    55       5.159   1.682  -9.334  1.00  0.00
ATOM    810  CG  ASP    55       4.297   0.488 -10.858  1.00  0.00
ATOM    811  OD1 ASP    55       4.819  -0.482 -11.451  1.00  0.00
ATOM    812  OD2 ASP    55       3.570   1.289 -11.492  1.00  0.00
ATOM    813  C   ASP    55       6.003   0.201  -7.336  1.00  0.00
ATOM    814  O   ASP    55       7.082   0.790  -7.341  1.00  0.00
ATOM    815  N   MET    56       5.357  -0.103  -6.211  1.00  0.00
ATOM    816  H   MET    56       4.506  -0.640  -6.301  1.00  0.00
ATOM    817  CA  MET    56       5.721   0.367  -4.864  1.00  0.00
ATOM    818  HA  MET    56       5.415   1.409  -4.759  1.00  0.00
ATOM    819  CB  MET    56       4.894  -0.468  -3.861  1.00  0.00
ATOM    820  HB2 MET    56       3.902  -0.022  -3.784  1.00  0.00
ATOM    821  HB3 MET    56       4.772  -1.487  -4.218  1.00  0.00
ATOM    822  CG  MET    56       5.517  -0.541  -2.461  1.00  0.00
ATOM    823  HG2 MET    56       6.332  -1.266  -2.471  1.00  0.00
ATOM    824  HG3 MET    56       5.943   0.440  -2.251  1.00  0.00
ATOM    825  SD  MET    56       4.444  -0.915  -1.049  1.00  0.00
ATOM    826  CE  MET    56       5.692  -0.615   0.238  1.00  0.00
ATOM    827  HE1 MET    56       5.221  -0.620   1.220  1.00  0.00
ATOM    828  HE2 MET    56       6.459  -1.390   0.202  1.00  0.00
ATOM    829  HE3 MET    56       6.158   0.357   0.075  1.00  0.00
ATOM    830  C   MET    56       7.220   0.296  -4.515  1.00  0.00
ATOM    831  O   MET    56       7.769   1.260  -3.980  1.00  0.00
ATOM    832  N   GLN    57       7.825  -0.878  -4.734  1.00  0.00
ATOM    833  H   GLN    57       7.265  -1.598  -5.180  1.00  0.00
ATOM    834  CA  GLN    57       9.189  -1.246  -4.348  1.00  0.00
ATOM    835  HA  GLN    57       9.309  -1.014  -3.290  1.00  0.00
ATOM    836  CB  GLN    57       9.437  -2.755  -4.594  1.00  0.00
ATOM    837  HB2 GLN    57       8.541  -3.315  -4.328  1.00  0.00
ATOM    838  HB3 GLN    57       9.652  -2.943  -5.646  1.00  0.00
ATOM    839  CG  GLN    57      10.587  -3.302  -3.743  1.00  0.00
ATOM    840  HG2 GLN    57      10.709  -4.366  -3.946  1.00  0.00
ATOM    841  HG3 GLN    57      11.516  -2.787  -4.001  1.00  0.00
ATOM    842  CD  GLN    57      10.285  -3.100  -2.242  1.00  0.00
ATOM    843  OE1 GLN    57      10.968  -2.321  -1.604  1.00  0.00
ATOM    844  NE2 GLN    57       9.207  -3.611  -1.646  1.00  0.00
ATOM    845 HE21 GLN    57       9.030  -3.385  -0.681  1.00  0.00
ATOM    846 HE22 GLN    57       8.588  -4.215  -2.157  1.00  0.00
ATOM    847  C   GLN    57      10.214  -0.446  -5.155  1.00  0.00
ATOM    848  O   GLN    57      11.174   0.097  -4.599  1.00  0.00
ATOM    849  N   GLY    58       9.966  -0.331  -6.469  1.00  0.00
ATOM    850  H   GLY    58       9.169  -0.827  -6.855  1.00  0.00
ATOM    851  CA  GLY    58      10.684   0.597  -7.338  1.00  0.00
ATOM    852  HA2 GLY    58      11.738   0.321  -7.387  1.00  0.00
ATOM    853  HA3 GLY    58      10.258   0.565  -8.340  1.00  0.00
ATOM    854  C   GLY    58      10.569   2.033  -6.814  1.00  0.00
ATOM    855  O   GLY    58      11.576   2.606  -6.393  1.00  0.00
ATOM    856  N   VAL    59       9.346   2.591  -6.799  1.00  0.00
ATOM    857  H   VAL    59       8.568   1.986  -7.055  1.00  0.00
ATOM    858  CA  VAL    59       9.007   3.960  -6.356  1.00  0.00
ATOM    859  HA  VAL    59       9.319   4.686  -7.108  1.00  0.00
ATOM    860  CB  VAL    59       7.480   4.059  -6.136  1.00  0.00
ATOM    861  HB  VAL    59       7.177   3.187  -5.560  1.00  0.00
ATOM    862  CG1 VAL    59       7.018   5.291  -5.336  1.00  0.00
ATOM    863 HG11 VAL    59       7.313   6.204  -5.855  1.00  0.00
ATOM    864 HG12 VAL    59       5.932   5.268  -5.244  1.00  0.00
ATOM    865 HG13 VAL    59       7.437   5.296  -4.331  1.00  0.00
ATOM    866  CG2 VAL    59       6.703   4.025  -7.467  1.00  0.00
ATOM    867 HG21 VAL    59       6.743   5.002  -7.948  1.00  0.00
ATOM    868 HG22 VAL    59       7.127   3.287  -8.148  1.00  0.00
ATOM    869 HG23 VAL    59       5.663   3.757  -7.278  1.00  0.00
ATOM    870  C   VAL    59       9.705   4.301  -5.051  1.00  0.00
ATOM    871  O   VAL    59      10.333   5.346  -4.942  1.00  0.00
ATOM    872  N   VAL    60       9.590   3.466  -4.028  1.00  0.00
ATOM    873  H   VAL    60       9.039   2.617  -4.128  1.00  0.00
ATOM    874  CA  VAL    60      10.095   3.847  -2.709  1.00  0.00
ATOM    875  HA  VAL    60       9.756   4.863  -2.504  1.00  0.00
ATOM    876  CB  VAL    60       9.449   2.947  -1.648  1.00  0.00
ATOM    877  HB  VAL    60       8.366   3.034  -1.744  1.00  0.00
ATOM    878  CG1 VAL    60       9.832   1.471  -1.727  1.00  0.00
ATOM    879 HG11 VAL    60       9.121   0.873  -1.157  1.00  0.00
ATOM    880 HG12 VAL    60       9.829   1.137  -2.755  1.00  0.00
ATOM    881 HG13 VAL    60      10.836   1.309  -1.334  1.00  0.00
ATOM    882  CG2 VAL    60       9.847   3.401  -0.255  1.00  0.00
ATOM    883 HG21 VAL    60       9.300   2.823   0.490  1.00  0.00
ATOM    884 HG22 VAL    60      10.916   3.257  -0.100  1.00  0.00
ATOM    885 HG23 VAL    60       9.616   4.457  -0.128  1.00  0.00
ATOM    886  C   VAL    60      11.634   3.900  -2.684  1.00  0.00
ATOM    887  O   VAL    60      12.207   4.825  -2.104  1.00  0.00
ATOM    888  N   THR    61      12.306   3.020  -3.433  1.00  0.00
ATOM    889  H   THR    61      11.786   2.289  -3.903  1.00  0.00
ATOM    890  CA  THR    61      13.761   3.096  -3.671  1.00  0.00
ATOM    891  HA  THR    61      14.292   3.028  -2.722  1.00  0.00
ATOM    892  CB  THR    61      14.188   1.935  -4.573  1.00  0.00
ATOM    893  HB  THR    61      13.831   2.122  -5.583  1.00  0.00
ATOM    894  CG2 THR    61      15.683   1.701  -4.669  1.00  0.00
ATOM    895 HG21 THR    61      16.200   2.616  -4.939  1.00  0.00
ATOM    896 HG22 THR    61      16.080   1.330  -3.723  1.00  0.00
ATOM    897 HG23 THR    61      15.868   0.974  -5.454  1.00  0.00
ATOM    898  OG1 THR    61      13.744   0.671  -4.156  1.00  0.00
ATOM    899  HG1 THR    61      12.816   0.559  -4.445  1.00  0.00
ATOM    900  C   THR    61      14.207   4.376  -4.366  1.00  0.00
ATOM    901  O   THR    61      15.202   4.985  -3.965  1.00  0.00
ATOM    902  N   ASP    62      13.437   4.859  -5.351  1.00  0.00
ATOM    903  H   ASP    62      12.687   4.274  -5.714  1.00  0.00
ATOM    904  CA  ASP    62      13.681   6.154  -5.983  1.00  0.00
ATOM    905  HA  ASP    62      14.748   6.241  -6.181  1.00  0.00
ATOM    906  CB  ASP    62      12.945   6.230  -7.334  1.00  0.00
ATOM    907  HB2 ASP    62      11.888   5.983  -7.216  1.00  0.00
ATOM    908  HB3 ASP    62      13.019   7.240  -7.730  1.00  0.00
ATOM    909  CG  ASP    62      13.609   5.285  -8.343  1.00  0.00
ATOM    910  OD1 ASP    62      14.865   5.173  -8.326  1.00  0.00
ATOM    911  OD2 ASP    62      12.859   4.690  -9.150  1.00  0.00
ATOM    912  C   ASP    62      13.368   7.328  -5.045  1.00  0.00
ATOM    913  O   ASP    62      14.201   8.221  -4.868  1.00  0.00
ATOM    914  N   GLY    63      12.217   7.312  -4.384  1.00  0.00
ATOM    915  H   GLY    63      11.634   6.489  -4.496  1.00  0.00
ATOM    916  CA  GLY    63      11.833   8.267  -3.354  1.00  0.00
ATOM    917  HA2 GLY    63      11.610   9.235  -3.798  1.00  0.00
ATOM    918  HA3 GLY    63      10.942   7.879  -2.864  1.00  0.00
ATOM    919  C   GLY    63      12.908   8.423  -2.275  1.00  0.00
ATOM    920  O   GLY    63      13.368   9.543  -2.050  1.00  0.00
ATOM    921  N   MET    64      13.373   7.326  -1.655  1.00  0.00
ATOM    922  H   MET    64      12.943   6.426  -1.852  1.00  0.00
ATOM    923  CA  MET    64      14.475   7.388  -0.684  1.00  0.00
ATOM    924  HA  MET    64      14.174   8.050   0.127  1.00  0.00
ATOM    925  CB  MET    64      14.749   6.008  -0.054  1.00  0.00
ATOM    926  HB2 MET    64      14.894   5.276  -0.849  1.00  0.00
ATOM    927  HB3 MET    64      15.683   6.084   0.504  1.00  0.00
ATOM    928  CG  MET    64      13.692   5.475   0.926  1.00  0.00
ATOM    929  HG2 MET    64      13.497   6.220   1.698  1.00  0.00
ATOM    930  HG3 MET    64      12.764   5.324   0.374  1.00  0.00
ATOM    931  SD  MET    64      14.150   3.887   1.713  1.00  0.00
ATOM    932  CE  MET    64      12.545   3.639   2.513  1.00  0.00
ATOM    933  HE1 MET    64      12.024   2.811   2.032  1.00  0.00
ATOM    934  HE2 MET    64      12.664   3.428   3.569  1.00  0.00
ATOM    935  HE3 MET    64      11.934   4.539   2.424  1.00  0.00
ATOM    936  C   MET    64      15.768   7.999  -1.273  1.00  0.00
ATOM    937  O   MET    64      16.407   8.825  -0.609  1.00  0.00
ATOM    938  N   ALA    65      16.173   7.647  -2.502  1.00  0.00
ATOM    939  H   ALA    65      15.629   6.993  -3.055  1.00  0.00
ATOM    940  CA  ALA    65      17.440   8.181  -3.029  1.00  0.00
ATOM    941  HA  ALA    65      18.188   8.112  -2.237  1.00  0.00
ATOM    942  CB  ALA    65      17.934   7.322  -4.198  1.00  0.00
ATOM    943  HB1 ALA    65      18.990   7.533  -4.376  1.00  0.00
ATOM    944  HB2 ALA    65      17.819   6.262  -3.968  1.00  0.00
ATOM    945  HB3 ALA    65      17.366   7.558  -5.098  1.00  0.00
ATOM    946  C   ALA    65      17.316   9.661  -3.444  1.00  0.00
ATOM    947  O   ALA    65      18.293  10.422  -3.479  1.00  0.00
ATOM    948  N   SER    66      16.091  10.099  -3.719  1.00  0.00
ATOM    949  H   SER    66      15.302   9.461  -3.673  1.00  0.00
ATOM    950  CA  SER    66      15.906  11.481  -4.128  1.00  0.00
ATOM    951  HA  SER    66      16.680  11.718  -4.858  1.00  0.00
ATOM    952  CB  SER    66      14.576  11.636  -4.856  1.00  0.00
ATOM    953  HB2 SER    66      13.740  11.402  -4.194  1.00  0.00
ATOM    954  HB3 SER    66      14.485  12.662  -5.211  1.00  0.00
ATOM    955  OG  SER    66      14.604  10.749  -5.977  1.00  0.00
ATOM    956  HG  SER    66      14.646   9.840  -5.622  1.00  0.00
ATOM    957  C   SER    66      16.114  12.479  -2.983  1.00  0.00
ATOM    958  O   SER    66      16.850  13.459  -3.141  1.00  0.00
ATOM    959  N   GLY    67      15.464  12.269  -1.833  1.00  0.00
ATOM    960  H   GLY    67      14.787  11.517  -1.800  1.00  0.00
ATOM    961  CA  GLY    67      15.743  13.001  -0.573  1.00  0.00
ATOM    962  HA2 GLY    67      16.038  12.268   0.174  1.00  0.00
ATOM    963  HA3 GLY    67      16.595  13.660  -0.712  1.00  0.00
ATOM    964  C   GLY    67      14.628  13.836   0.034  1.00  0.00
ATOM    965  O   GLY    67      13.698  14.120  -0.713  1.00  0.00
ATOM    966  N   LEU    68      14.677  14.173   1.342  1.00  0.00
ATOM    967  H   LEU    68      15.474  13.872   1.892  1.00  0.00
ATOM    968  CA  LEU    68      13.586  14.870   2.040  1.00  0.00
ATOM    969  HA  LEU    68      12.768  14.156   2.129  1.00  0.00
ATOM    970  CB  LEU    68      14.057  15.212   3.464  1.00  0.00
ATOM    971  HB2 LEU    68      14.383  14.282   3.930  1.00  0.00
ATOM    972  HB3 LEU    68      14.915  15.884   3.421  1.00  0.00
ATOM    973  CG  LEU    68      12.948  15.860   4.306  1.00  0.00
ATOM    974  HG  LEU    68      11.994  15.456   4.006  1.00  0.00
ATOM    975  CD1 LEU    68      13.161  15.548   5.779  1.00  0.00
ATOM    976 HD11 LEU    68      12.289  15.868   6.346  1.00  0.00
ATOM    977 HD12 LEU    68      13.306  14.478   5.925  1.00  0.00
ATOM    978 HD13 LEU    68      14.044  16.077   6.137  1.00  0.00
ATOM    979  CD2 LEU    68      12.959  17.394   4.167  1.00  0.00
ATOM    980 HD21 LEU    68      12.220  17.831   4.829  1.00  0.00
ATOM    981 HD22 LEU    68      13.931  17.787   4.458  1.00  0.00
ATOM    982 HD23 LEU    68      12.740  17.738   3.163  1.00  0.00
ATOM    983  C   LEU    68      13.005  16.090   1.313  1.00  0.00
ATOM    984  O   LEU    68      11.794  16.326   1.321  1.00  0.00
ATOM    985  N   ASP    69      13.871  16.915   0.733  1.00  0.00
ATOM    986  H   ASP    69      14.846  16.630   0.706  1.00  0.00
ATOM    987  CA  ASP    69      13.484  18.180   0.091  1.00  0.00
ATOM    988  HA  ASP    69      12.800  18.677   0.782  1.00  0.00
ATOM    989  CB  ASP    69      14.681  19.166  -0.075  1.00  0.00
ATOM    990  HB2 ASP    69      14.269  20.176  -0.112  1.00  0.00
ATOM    991  HB3 ASP    69      15.338  19.133   0.796  1.00  0.00
ATOM    992  CG  ASP    69      15.518  18.997  -1.339  1.00  0.00
ATOM    993  OD1 ASP    69      16.469  18.209  -1.405  1.00  0.00
ATOM    994  OD2 ASP    69      15.322  19.719  -2.327  1.00  0.00
ATOM    995  C   ASP    69      12.684  17.957  -1.213  1.00  0.00
ATOM    996  O   ASP    69      12.037  18.900  -1.670  1.00  0.00
ATOM    997  N   LYS    70      12.703  16.729  -1.774  1.00  0.00
ATOM    998  H   LYS    70      13.218  16.018  -1.261  1.00  0.00
ATOM    999  CA  LYS    70      11.864  16.225  -2.878  1.00  0.00
ATOM   1000  HA  LYS    70      11.594  17.059  -3.529  1.00  0.00
ATOM   1001  CB  LYS    70      12.735  15.222  -3.692  1.00  0.00
ATOM   1002  HB2 LYS    70      12.779  14.280  -3.141  1.00  0.00
ATOM   1003  HB3 LYS    70      12.225  15.024  -4.633  1.00  0.00
ATOM   1004  CG  LYS    70      14.208  15.644  -4.037  1.00  0.00
ATOM   1005  HG2 LYS    70      14.809  15.586  -3.128  1.00  0.00
ATOM   1006  HG3 LYS    70      14.617  14.915  -4.738  1.00  0.00
ATOM   1007  CD  LYS    70      14.382  17.064  -4.644  1.00  0.00
ATOM   1008  HD2 LYS    70      13.679  17.171  -5.471  1.00  0.00
ATOM   1009  HD3 LYS    70      14.125  17.811  -3.893  1.00  0.00
ATOM   1010  CE  LYS    70      15.780  17.405  -5.180  1.00  0.00
ATOM   1011  HE2 LYS    70      16.075  16.683  -5.946  1.00  0.00
ATOM   1012  HE3 LYS    70      15.755  18.385  -5.657  1.00  0.00
ATOM   1013  NZ  LYS    70      16.789  17.413  -4.109  1.00  0.00
ATOM   1014  HZ1 LYS    70      17.048  16.467  -3.842  1.00  0.00
ATOM   1015  HZ2 LYS    70      17.649  17.832  -4.462  1.00  0.00
ATOM   1016  HZ3 LYS    70      16.496  17.912  -3.268  1.00  0.00
ATOM   1017  C   LYS    70      10.519  15.576  -2.406  1.00  0.00
ATOM   1018  O   LYS    70       9.911  14.861  -3.215  1.00  0.00
ATOM   1019  N   ASP    71      10.169  15.732  -1.104  1.00  0.00
ATOM   1020  H   ASP    71      10.817  16.282  -0.555  1.00  0.00
ATOM   1021  CA  ASP    71       9.145  15.000  -0.310  1.00  0.00
ATOM   1022  HA  ASP    71       9.251  15.341   0.720  1.00  0.00
ATOM   1023  CB  ASP    71       7.704  15.359  -0.726  1.00  0.00
ATOM   1024  HB2 ASP    71       7.555  15.134  -1.785  1.00  0.00
ATOM   1025  HB3 ASP    71       6.994  14.760  -0.155  1.00  0.00
ATOM   1026  CG  ASP    71       7.422  16.834  -0.443  1.00  0.00
ATOM   1027  OD1 ASP    71       7.126  17.512  -1.449  1.00  0.00
ATOM   1028  OD2 ASP    71       7.618  17.343   0.695  1.00  0.00
ATOM   1029  C   ASP    71       9.414  13.496  -0.216  1.00  0.00
ATOM   1030  O   ASP    71       8.495  12.700  -0.052  1.00  0.00
ATOM   1031  N   TYR    72      10.690  13.109  -0.284  1.00  0.00
ATOM   1032  H   TYR    72      11.408  13.819  -0.264  1.00  0.00
ATOM   1033  CA  TYR    72      11.125  11.750  -0.572  1.00  0.00
ATOM   1034  HA  TYR    72      12.177  11.827  -0.840  1.00  0.00
ATOM   1035  CB  TYR    72      11.078  10.890   0.715  1.00  0.00
ATOM   1036  HB2 TYR    72      10.138  11.055   1.244  1.00  0.00
ATOM   1037  HB3 TYR    72      11.093   9.841   0.421  1.00  0.00
ATOM   1038  CG  TYR    72      12.265  11.061   1.683  1.00  0.00
ATOM   1039  CD1 TYR    72      13.564  10.673   1.270  1.00  0.00
ATOM   1040  HD1 TYR    72      13.707  10.279   0.276  1.00  0.00
ATOM   1041  CE1 TYR    72      14.682  10.795   2.127  1.00  0.00
ATOM   1042  HE1 TYR    72      15.667  10.490   1.800  1.00  0.00
ATOM   1043  CZ  TYR    72      14.490  11.300   3.426  1.00  0.00
ATOM   1044  OH  TYR    72      15.521  11.411   4.290  1.00  0.00
ATOM   1045  HH  TYR    72      16.381  11.344   3.820  1.00  0.00
ATOM   1046  CE2 TYR    72      13.219  11.717   3.847  1.00  0.00
ATOM   1047  HE2 TYR    72      13.106  12.116   4.844  1.00  0.00
ATOM   1048  CD2 TYR    72      12.108  11.573   2.993  1.00  0.00
ATOM   1049  HD2 TYR    72      11.128  11.862   3.343  1.00  0.00
ATOM   1050  C   TYR    72      10.463  11.131  -1.827  1.00  0.00
ATOM   1051  O   TYR    72      10.057   9.976  -1.807  1.00  0.00
ATOM   1052  N   LEU    73      10.335  11.861  -2.939  1.00  0.00
ATOM   1053  H   LEU    73      10.584  12.841  -2.913  1.00  0.00
ATOM   1054  CA  LEU    73       9.825  11.340  -4.218  1.00  0.00
ATOM   1055  HA  LEU    73       9.736  10.254  -4.189  1.00  0.00
ATOM   1056  CB  LEU    73       8.444  11.924  -4.570  1.00  0.00
ATOM   1057  HB2 LEU    73       8.581  12.972  -4.820  1.00  0.00
ATOM   1058  HB3 LEU    73       8.073  11.398  -5.444  1.00  0.00
ATOM   1059  CG  LEU    73       7.383  11.841  -3.469  1.00  0.00
ATOM   1060  HG  LEU    73       7.780  12.239  -2.539  1.00  0.00
ATOM   1061  CD1 LEU    73       6.160  12.676  -3.842  1.00  0.00
ATOM   1062 HD11 LEU    73       5.750  12.333  -4.792  1.00  0.00
ATOM   1063 HD12 LEU    73       5.413  12.578  -3.056  1.00  0.00
ATOM   1064 HD13 LEU    73       6.445  13.725  -3.923  1.00  0.00
ATOM   1065  CD2 LEU    73       6.936  10.397  -3.255  1.00  0.00
ATOM   1066 HD21 LEU    73       6.515   9.991  -4.175  1.00  0.00
ATOM   1067 HD22 LEU    73       7.779   9.785  -2.946  1.00  0.00
ATOM   1068 HD23 LEU    73       6.186  10.372  -2.468  1.00  0.00
ATOM   1069  C   LEU    73      10.818  11.716  -5.314  1.00  0.00
ATOM   1070  O   LEU    73      11.489  12.745  -5.228  1.00  0.00
ATOM   1071  N   LYS    74      10.882  10.922  -6.382  1.00  0.00
ATOM   1072  H   LYS    74      10.311  10.082  -6.406  1.00  0.00
ATOM   1073  CA  LYS    74      11.622  11.297  -7.601  1.00  0.00
ATOM   1074  HA  LYS    74      12.563  11.766  -7.308  1.00  0.00
ATOM   1075  CB  LYS    74      11.946  10.036  -8.447  1.00  0.00
ATOM   1076  HB2 LYS    74      12.592   9.388  -7.856  1.00  0.00
ATOM   1077  HB3 LYS    74      11.021   9.506  -8.671  1.00  0.00
ATOM   1078  CG  LYS    74      12.677  10.372  -9.757  1.00  0.00
ATOM   1079  HG2 LYS    74      12.044  10.990 -10.395  1.00  0.00
ATOM   1080  HG3 LYS    74      13.571  10.944  -9.508  1.00  0.00
ATOM   1081  CD  LYS    74      13.131   9.133 -10.543  1.00  0.00
ATOM   1082  HD2 LYS    74      13.778   9.481 -11.347  1.00  0.00
ATOM   1083  HD3 LYS    74      13.715   8.485  -9.887  1.00  0.00
ATOM   1084  CE  LYS    74      11.932   8.355 -11.133  1.00  0.00
ATOM   1085  HE2 LYS    74      11.494   7.690 -10.385  1.00  0.00
ATOM   1086  HE3 LYS    74      11.166   9.084 -11.407  1.00  0.00
ATOM   1087  NZ  LYS    74      12.271   7.616 -12.374  1.00  0.00
ATOM   1088  HZ1 LYS    74      12.893   6.826 -12.225  1.00  0.00
ATOM   1089  HZ2 LYS    74      11.415   7.241 -12.781  1.00  0.00
ATOM   1090  HZ3 LYS    74      12.695   8.235 -13.060  1.00  0.00
ATOM   1091  C   LYS    74      10.731  12.340  -8.340  1.00  0.00
ATOM   1092  O   LYS    74       9.507  12.165  -8.425  1.00  0.00
ATOM   1093  N   PRO    75      11.251  13.480  -8.827  1.00  0.00
ATOM   1094  CD  PRO    75      12.618  13.940  -8.688  1.00  0.00
ATOM   1095  HD2 PRO    75      13.341  13.182  -8.984  1.00  0.00
ATOM   1096  HD3 PRO    75      12.789  14.250  -7.656  1.00  0.00
ATOM   1097  CG  PRO    75      12.734  15.153  -9.594  1.00  0.00
ATOM   1098  HG2 PRO    75      13.162  14.851 -10.550  1.00  0.00
ATOM   1099  HG3 PRO    75      13.365  15.910  -9.129  1.00  0.00
ATOM   1100  CB  PRO    75      11.321  15.688  -9.805  1.00  0.00
ATOM   1101  HB2 PRO    75      11.199  16.080 -10.817  1.00  0.00
ATOM   1102  HB3 PRO    75      11.116  16.467  -9.072  1.00  0.00
ATOM   1103  CA  PRO    75      10.417  14.488  -9.516  1.00  0.00
ATOM   1104  HA  PRO    75       9.614  14.812  -8.852  1.00  0.00
ATOM   1105  C   PRO    75       9.775  13.935 -10.783  1.00  0.00
ATOM   1106  O   PRO    75      10.329  13.024 -11.402  1.00  0.00
ATOM   1107  N   ASP    76       8.642  14.504 -11.189  1.00  0.00
ATOM   1108  H   ASP    76       8.321  15.320 -10.689  1.00  0.00
ATOM   1109  CA  ASP    76       7.839  14.066 -12.335  1.00  0.00
ATOM   1110  HA  ASP    76       6.828  14.445 -12.184  1.00  0.00
ATOM   1111  CB  ASP    76       8.410  14.767 -13.593  1.00  0.00
ATOM   1112  HB2 ASP    76       9.496  14.803 -13.512  1.00  0.00
ATOM   1113  HB3 ASP    76       8.197  14.173 -14.479  1.00  0.00
ATOM   1114  CG  ASP    76       7.902  16.193 -13.865  1.00  0.00
ATOM   1115  OD1 ASP    76       6.709  16.438 -14.181  1.00  0.00
ATOM   1116  OD2 ASP    76       8.734  17.117 -13.748  1.00  0.00
ATOM   1117  C   ASP    76       7.636  12.544 -12.548  1.00  0.00
ATOM   1118  O   ASP    76       7.257  12.121 -13.623  1.00  0.00
ATOM   1119  N   ASP    77       7.802  11.661 -11.566  1.00  0.00
ATOM   1120  H   ASP    77       8.156  12.011 -10.689  1.00  0.00
ATOM   1121  CA  ASP    77       7.671  10.186 -11.705  1.00  0.00
ATOM   1122  HA  ASP    77       8.285   9.909 -12.564  1.00  0.00
ATOM   1123  CB  ASP    77       8.316   9.481 -10.498  1.00  0.00
ATOM   1124  HB2 ASP    77       9.373   9.749 -10.479  1.00  0.00
ATOM   1125  HB3 ASP    77       7.882   9.828  -9.559  1.00  0.00
ATOM   1126  CG  ASP    77       8.234   7.953 -10.558  1.00  0.00
ATOM   1127  OD1 ASP    77       7.835   7.359 -11.589  1.00  0.00
ATOM   1128  OD2 ASP    77       8.721   7.319  -9.602  1.00  0.00
ATOM   1129  C   ASP    77       6.240   9.652 -12.006  1.00  0.00
ATOM   1130  O   ASP    77       5.284   9.880 -11.259  1.00  0.00
ATOM   1131  N   SER    78       6.108   8.982 -13.163  1.00  0.00
ATOM   1132  H   SER    78       6.934   8.893 -13.739  1.00  0.00
ATOM   1133  CA  SER    78       4.836   8.564 -13.767  1.00  0.00
ATOM   1134  HA  SER    78       4.126   9.384 -13.693  1.00  0.00
ATOM   1135  CB  SER    78       5.025   8.240 -15.246  1.00  0.00
ATOM   1136  HB2 SER    78       5.546   7.287 -15.333  1.00  0.00
ATOM   1137  HB3 SER    78       4.045   8.156 -15.718  1.00  0.00
ATOM   1138  OG  SER    78       5.781   9.228 -15.904  1.00  0.00
ATOM   1139  HG  SER    78       6.720   9.044 -15.699  1.00  0.00
ATOM   1140  C   SER    78       4.192   7.339 -13.121  1.00  0.00
ATOM   1141  O   SER    78       2.991   7.138 -13.312  1.00  0.00
ATOM   1142  N   ARG    79       4.912   6.548 -12.312  1.00  0.00
ATOM   1143  H   ARG    79       5.919   6.680 -12.326  1.00  0.00
ATOM   1144  CA  ARG    79       4.358   5.357 -11.623  1.00  0.00
ATOM   1145  HA  ARG    79       3.717   4.784 -12.296  1.00  0.00
ATOM   1146  CB  ARG    79       5.515   4.495 -11.125  1.00  0.00
ATOM   1147  HB2 ARG    79       6.082   5.094 -10.411  1.00  0.00
ATOM   1148  HB3 ARG    79       5.120   3.625 -10.601  1.00  0.00
ATOM   1149  CG  ARG    79       6.458   4.024 -12.232  1.00  0.00
ATOM   1150  HG2 ARG    79       5.960   3.256 -12.815  1.00  0.00
ATOM   1151  HG3 ARG    79       6.731   4.846 -12.891  1.00  0.00
ATOM   1152  CD  ARG    79       7.742   3.429 -11.650  1.00  0.00
ATOM   1153  HD2 ARG    79       7.507   2.709 -10.863  1.00  0.00
ATOM   1154  HD3 ARG    79       8.259   2.902 -12.453  1.00  0.00
ATOM   1155  NE  ARG    79       8.622   4.473 -11.136  1.00  0.00
ATOM   1156  HE  ARG    79       8.266   5.427 -11.113  1.00  0.00
ATOM   1157  CZ  ARG    79       9.851   4.340 -10.694  1.00  0.00
ATOM   1158  NH1 ARG    79      10.517   3.236 -10.534  1.00  0.00
ATOM   1159 HH11 ARG    79      10.102   2.357 -10.842  1.00  0.00
ATOM   1160 HH12 ARG    79      11.512   3.311 -10.367  1.00  0.00
ATOM   1161  NH2 ARG    79      10.455   5.418 -10.365  1.00  0.00
ATOM   1162 HH21 ARG    79       9.846   6.187 -10.100  1.00  0.00
ATOM   1163 HH22 ARG    79      11.333   5.263  -9.872  1.00  0.00
ATOM   1164  C   ARG    79       3.521   5.775 -10.408  1.00  0.00
ATOM   1165  O   ARG    79       2.658   5.026  -9.968  1.00  0.00
ATOM   1166  N   VAL    80       3.737   6.989  -9.884  1.00  0.00
ATOM   1167  H   VAL    80       4.494   7.519 -10.292  1.00  0.00
ATOM   1168  CA  VAL    80       2.991   7.646  -8.781  1.00  0.00
ATOM   1169  HA  VAL    80       2.877   6.908  -7.987  1.00  0.00
ATOM   1170  CB  VAL    80       3.824   8.813  -8.178  1.00  0.00
ATOM   1171  HB  VAL    80       3.879   9.651  -8.874  1.00  0.00
ATOM   1172  CG1 VAL    80       3.185   9.284  -6.861  1.00  0.00
ATOM   1173 HG11 VAL    80       2.997   8.430  -6.207  1.00  0.00
ATOM   1174 HG12 VAL    80       3.850   9.980  -6.348  1.00  0.00
ATOM   1175 HG13 VAL    80       2.241   9.785  -7.073  1.00  0.00
ATOM   1176  CG2 VAL    80       5.256   8.337  -7.835  1.00  0.00
ATOM   1177 HG21 VAL    80       5.852   8.251  -8.744  1.00  0.00
ATOM   1178 HG22 VAL    80       5.753   9.051  -7.178  1.00  0.00
ATOM   1179 HG23 VAL    80       5.221   7.370  -7.333  1.00  0.00
ATOM   1180  C   VAL    80       1.563   8.052  -9.210  1.00  0.00
ATOM   1181  O   VAL    80       1.380   8.950 -10.039  1.00  0.00
ATOM   1182  N   ILE    81       0.549   7.326  -8.704  1.00  0.00
ATOM   1183  H   ILE    81       0.786   6.631  -8.001  1.00  0.00
ATOM   1184  CA  ILE    81      -0.891   7.532  -8.982  1.00  0.00
ATOM   1185  HA  ILE    81      -1.014   7.664 -10.057  1.00  0.00
ATOM   1186  CB  ILE    81      -1.694   6.271  -8.588  1.00  0.00
ATOM   1187  HB  ILE    81      -1.466   6.031  -7.557  1.00  0.00
ATOM   1188  CG2 ILE    81      -3.202   6.496  -8.728  1.00  0.00
ATOM   1189 HG21 ILE    81      -3.531   7.377  -8.178  1.00  0.00
ATOM   1190 HG22 ILE    81      -3.460   6.610  -9.778  1.00  0.00
ATOM   1191 HG23 ILE    81      -3.745   5.646  -8.315  1.00  0.00
ATOM   1192  CG1 ILE    81      -1.261   5.099  -9.499  1.00  0.00
ATOM   1193 HG12 ILE    81      -1.352   5.426 -10.534  1.00  0.00
ATOM   1194 HG13 ILE    81      -0.209   4.886  -9.317  1.00  0.00
ATOM   1195  CD1 ILE    81      -2.021   3.770  -9.387  1.00  0.00
ATOM   1196 HD11 ILE    81      -1.598   3.063 -10.102  1.00  0.00
ATOM   1197 HD12 ILE    81      -1.911   3.370  -8.380  1.00  0.00
ATOM   1198 HD13 ILE    81      -3.077   3.901  -9.623  1.00  0.00
ATOM   1199  C   ILE    81      -1.423   8.823  -8.333  1.00  0.00
ATOM   1200  O   ILE    81      -1.910   9.695  -9.052  1.00  0.00
ATOM   1201  N   ALA    82      -1.225   9.011  -7.024  1.00  0.00
ATOM   1202  H   ALA    82      -0.760   8.284  -6.496  1.00  0.00
ATOM   1203  CA  ALA    82      -1.377  10.312  -6.357  1.00  0.00
ATOM   1204  HA  ALA    82      -1.135  11.109  -7.061  1.00  0.00
ATOM   1205  CB  ALA    82      -2.824  10.476  -5.863  1.00  0.00
ATOM   1206  HB1 ALA    82      -2.947   9.981  -4.899  1.00  0.00
ATOM   1207  HB2 ALA    82      -3.062  11.534  -5.750  1.00  0.00
ATOM   1208  HB3 ALA    82      -3.521  10.028  -6.572  1.00  0.00
ATOM   1209  C   ALA    82      -0.449  10.381  -5.130  1.00  0.00
ATOM   1210  O   ALA    82      -0.046   9.332  -4.614  1.00  0.00
ATOM   1211  N   HIS    83      -0.170  11.584  -4.611  1.00  0.00
ATOM   1212  H   HIS    83      -0.323  12.400  -5.200  1.00  0.00
ATOM   1213  CA  HIS    83       0.552  11.768  -3.351  1.00  0.00
ATOM   1214  HA  HIS    83       0.211  10.992  -2.671  1.00  0.00
ATOM   1215  CB  HIS    83       2.066  11.619  -3.566  1.00  0.00
ATOM   1216  HB2 HIS    83       2.552  11.617  -2.588  1.00  0.00
ATOM   1217  HB3 HIS    83       2.286  10.660  -4.037  1.00  0.00
ATOM   1218  CG  HIS    83       2.666  12.736  -4.386  1.00  0.00
ATOM   1219  ND1 HIS    83       3.100  13.942  -3.865  1.00  0.00
ATOM   1220  HD1 HIS    83       3.140  14.180  -2.871  1.00  0.00
ATOM   1221  CE1 HIS    83       3.496  14.722  -4.884  1.00  0.00
ATOM   1222  HE1 HIS    83       3.866  15.734  -4.801  1.00  0.00
ATOM   1223  NE2 HIS    83       3.365  14.033  -6.031  1.00  0.00
ATOM   1224  HE2 HIS    83       3.556  14.403  -6.966  1.00  0.00
ATOM   1225  CD2 HIS    83       2.838  12.787  -5.744  1.00  0.00
ATOM   1226  HD2 HIS    83       2.557  12.033  -6.468  1.00  0.00
ATOM   1227  C   HIS    83       0.308  13.124  -2.692  1.00  0.00
ATOM   1228  O   HIS    83       0.188  14.160  -3.357  1.00  0.00
ATOM   1229  N   THR    84       0.296  13.110  -1.362  1.00  0.00
ATOM   1230  H   THR    84       0.316  12.210  -0.892  1.00  0.00
ATOM   1231  CA  THR    84       0.548  14.323  -0.555  1.00  0.00
ATOM   1232  HA  THR    84      -0.100  15.112  -0.941  1.00  0.00
ATOM   1233  CB  THR    84       0.193  14.166   0.944  1.00  0.00
ATOM   1234  HB  THR    84       0.239  15.140   1.419  1.00  0.00
ATOM   1235  CG2 THR    84      -1.216  13.628   1.157  1.00  0.00
ATOM   1236 HG21 THR    84      -1.929  14.213   0.575  1.00  0.00
ATOM   1237 HG22 THR    84      -1.278  12.598   0.833  1.00  0.00
ATOM   1238 HG23 THR    84      -1.474  13.718   2.210  1.00  0.00
ATOM   1239  OG1 THR    84       1.104  13.344   1.642  1.00  0.00
ATOM   1240  HG1 THR    84       1.763  13.961   2.010  1.00  0.00
ATOM   1241  C   THR    84       2.001  14.839  -0.661  1.00  0.00
ATOM   1242  O   THR    84       2.934  14.085  -0.995  1.00  0.00
ATOM   1243  N   LYS    85       2.176  16.127  -0.301  1.00  0.00
ATOM   1244  H   LYS    85       1.322  16.639  -0.075  1.00  0.00
ATOM   1245  CA  LYS    85       3.423  16.704   0.269  1.00  0.00
ATOM   1246  HA  LYS    85       4.234  16.481  -0.414  1.00  0.00
ATOM   1247  CB  LYS    85       3.332  18.244   0.503  1.00  0.00
ATOM   1248  HB2 LYS    85       2.470  18.440   1.144  1.00  0.00
ATOM   1249  HB3 LYS    85       4.220  18.569   1.050  1.00  0.00
ATOM   1250  CG  LYS    85       3.224  19.124  -0.765  1.00  0.00
ATOM   1251  HG2 LYS    85       3.991  18.827  -1.468  1.00  0.00
ATOM   1252  HG3 LYS    85       2.246  18.974  -1.219  1.00  0.00
ATOM   1253  CD  LYS    85       3.453  20.617  -0.491  1.00  0.00
ATOM   1254  HD2 LYS    85       2.748  20.936   0.270  1.00  0.00
ATOM   1255  HD3 LYS    85       4.454  20.748  -0.079  1.00  0.00
ATOM   1256  CE  LYS    85       3.302  21.520  -1.725  1.00  0.00
ATOM   1257  HE2 LYS    85       3.570  22.547  -1.482  1.00  0.00
ATOM   1258  HE3 LYS    85       3.994  21.184  -2.501  1.00  0.00
ATOM   1259  NZ  LYS    85       1.924  21.485  -2.238  1.00  0.00
ATOM   1260  HZ1 LYS    85       1.627  20.527  -2.381  1.00  0.00
ATOM   1261  HZ2 LYS    85       1.257  21.860  -1.573  1.00  0.00
ATOM   1262  HZ3 LYS    85       1.878  21.962  -3.138  1.00  0.00
ATOM   1263  C   LYS    85       3.836  16.054   1.611  1.00  0.00
ATOM   1264  O   LYS    85       3.014  15.410   2.264  1.00  0.00
ATOM   1265  N   LEU    86       5.121  16.220   1.994  1.00  0.00
ATOM   1266  H   LEU    86       5.710  16.752   1.366  1.00  0.00
ATOM   1267  CA  LEU    86       5.784  15.854   3.271  1.00  0.00
ATOM   1268  HA  LEU    86       5.267  14.985   3.673  1.00  0.00
ATOM   1269  CB  LEU    86       7.288  15.479   3.041  1.00  0.00
ATOM   1270  HB2 LEU    86       7.357  14.838   2.164  1.00  0.00
ATOM   1271  HB3 LEU    86       7.830  16.399   2.844  1.00  0.00
ATOM   1272  CG  LEU    86       8.053  14.782   4.194  1.00  0.00
ATOM   1273  HG  LEU    86       7.930  15.412   5.072  1.00  0.00
ATOM   1274  CD1 LEU    86       7.516  13.406   4.567  1.00  0.00
ATOM   1275 HD11 LEU    86       7.751  12.671   3.796  1.00  0.00
ATOM   1276 HD12 LEU    86       7.948  13.097   5.518  1.00  0.00
ATOM   1277 HD13 LEU    86       6.449  13.476   4.677  1.00  0.00
ATOM   1278  CD2 LEU    86       9.557  14.685   3.938  1.00  0.00
ATOM   1279 HD21 LEU    86       9.888  15.644   3.542  1.00  0.00
ATOM   1280 HD22 LEU    86      10.080  14.495   4.876  1.00  0.00
ATOM   1281 HD23 LEU    86       9.788  13.905   3.214  1.00  0.00
ATOM   1282  C   LEU    86       5.653  17.022   4.285  1.00  0.00
ATOM   1283  O   LEU    86       6.189  18.117   4.060  1.00  0.00
ATOM   1284  N   ILE    87       4.994  16.749   5.423  1.00  0.00
ATOM   1285  H   ILE    87       4.715  15.784   5.561  1.00  0.00
ATOM   1286  CA  ILE    87       4.362  17.715   6.364  1.00  0.00
ATOM   1287  HA  ILE    87       4.810  18.700   6.208  1.00  0.00
ATOM   1288  CB  ILE    87       2.801  17.849   6.152  1.00  0.00
ATOM   1289  HB  ILE    87       2.465  18.670   6.786  1.00  0.00
ATOM   1290  CG2 ILE    87       2.456  18.260   4.696  1.00  0.00
ATOM   1291 HG21 ILE    87       1.506  18.788   4.693  1.00  0.00
ATOM   1292 HG22 ILE    87       3.210  18.938   4.303  1.00  0.00
ATOM   1293 HG23 ILE    87       2.406  17.377   4.057  1.00  0.00
ATOM   1294  CG1 ILE    87       2.008  16.567   6.592  1.00  0.00
ATOM   1295 HG12 ILE    87       2.424  15.716   6.060  1.00  0.00
ATOM   1296 HG13 ILE    87       2.139  16.385   7.659  1.00  0.00
ATOM   1297  CD1 ILE    87       0.493  16.581   6.299  1.00  0.00
ATOM   1298 HD11 ILE    87       0.057  15.616   6.551  1.00  0.00
ATOM   1299 HD12 ILE    87       0.017  17.348   6.904  1.00  0.00
ATOM   1300 HD13 ILE    87       0.309  16.770   5.247  1.00  0.00
ATOM   1301  C   ILE    87       4.657  17.290   7.818  1.00  0.00
ATOM   1302  O   ILE    87       4.811  16.094   8.112  1.00  0.00
ATOM   1303  N   GLY    88       4.753  18.293   8.691  1.00  0.00
ATOM   1304  H   GLY    88       4.518  19.217   8.336  1.00  0.00
ATOM   1305  CA  GLY    88       5.210  18.250  10.087  1.00  0.00
ATOM   1306  HA2 GLY    88       5.880  17.403  10.234  1.00  0.00
ATOM   1307  HA3 GLY    88       5.781  19.158  10.280  1.00  0.00
ATOM   1308  C   GLY    88       4.084  18.180  11.131  1.00  0.00
ATOM   1309  O   GLY    88       2.905  18.024  10.817  1.00  0.00
ATOM   1310  N   SER    89       4.424  18.273  12.414  1.00  0.00
ATOM   1311  H   SER    89       5.383  18.482  12.661  1.00  0.00
ATOM   1312  CA  SER    89       3.427  18.380  13.481  1.00  0.00
ATOM   1313  HA  SER    89       2.874  17.441  13.471  1.00  0.00
ATOM   1314  CB  SER    89       4.224  18.419  14.794  1.00  0.00
ATOM   1315  HB2 SER    89       3.559  18.441  15.657  1.00  0.00
ATOM   1316  HB3 SER    89       4.817  17.505  14.845  1.00  0.00
ATOM   1317  OG  SER    89       5.123  19.515  14.872  1.00  0.00
ATOM   1318  HG  SER    89       4.608  20.354  14.890  1.00  0.00
ATOM   1319  C   SER    89       2.355  19.514  13.308  1.00  0.00
ATOM   1320  O   SER    89       2.584  20.629  12.811  1.00  0.00
ATOM   1321  N   GLY    90       1.119  19.183  13.679  1.00  0.00
ATOM   1322  H   GLY    90       0.982  18.237  14.020  1.00  0.00
ATOM   1323  CA  GLY    90      -0.085  20.003  13.515  1.00  0.00
ATOM   1324  HA2 GLY    90      -0.912  19.439  13.929  1.00  0.00
ATOM   1325  HA3 GLY    90       0.030  20.893  14.128  1.00  0.00
ATOM   1326  C   GLY    90      -0.454  20.481  12.088  1.00  0.00
ATOM   1327  O   GLY    90      -1.344  21.332  11.982  1.00  0.00
ATOM   1328  N   GLU    91       0.250  20.029  11.037  1.00  0.00
ATOM   1329  H   GLU    91       0.944  19.312  11.210  1.00  0.00
ATOM   1330  CA  GLU    91      -0.110  20.228   9.627  1.00  0.00
ATOM   1331  HA  GLU    91      -0.729  21.121   9.531  1.00  0.00
ATOM   1332  CB  GLU    91       1.156  20.428   8.762  1.00  0.00
ATOM   1333  HB2 GLU    91       1.837  19.603   8.967  1.00  0.00
ATOM   1334  HB3 GLU    91       0.877  20.365   7.710  1.00  0.00
ATOM   1335  CG  GLU    91       1.889  21.763   8.949  1.00  0.00
ATOM   1336  HG2 GLU    91       1.517  22.491   8.229  1.00  0.00
ATOM   1337  HG3 GLU    91       1.665  22.140   9.948  1.00  0.00
ATOM   1338  CD  GLU    91       3.408  21.620   8.840  1.00  0.00
ATOM   1339  OE1 GLU    91       3.974  20.864   8.029  1.00  0.00
ATOM   1340  OE2 GLU    91       4.110  22.252   9.640  1.00  0.00
ATOM   1341  C   GLU    91      -0.917  19.061   9.090  1.00  0.00
ATOM   1342  O   GLU    91      -0.849  17.947   9.619  1.00  0.00
ATOM   1343  N   LYS    92      -1.627  19.395   8.025  1.00  0.00
ATOM   1344  H   LYS    92      -1.473  20.340   7.670  1.00  0.00
ATOM   1345  CA  LYS    92      -2.520  18.603   7.217  1.00  0.00
ATOM   1346  HA  LYS    92      -2.506  17.557   7.491  1.00  0.00
ATOM   1347  CB  LYS    92      -3.918  19.209   7.429  1.00  0.00
ATOM   1348  HB2 LYS    92      -4.226  18.978   8.448  1.00  0.00
ATOM   1349  HB3 LYS    92      -3.813  20.295   7.366  1.00  0.00
ATOM   1350  CG  LYS    92      -5.073  18.758   6.493  1.00  0.00
ATOM   1351  HG2 LYS    92      -4.743  18.530   5.482  1.00  0.00
ATOM   1352  HG3 LYS    92      -5.550  17.872   6.915  1.00  0.00
ATOM   1353  CD  LYS    92      -6.087  19.911   6.430  1.00  0.00
ATOM   1354  HD2 LYS    92      -6.410  20.113   7.451  1.00  0.00
ATOM   1355  HD3 LYS    92      -5.625  20.819   6.048  1.00  0.00
ATOM   1356  CE  LYS    92      -7.341  19.575   5.621  1.00  0.00
ATOM   1357  HE2 LYS    92      -7.563  18.531   5.847  1.00  0.00
ATOM   1358  HE3 LYS    92      -8.185  20.188   5.955  1.00  0.00
ATOM   1359  NZ  LYS    92      -7.176  19.689   4.153  1.00  0.00
ATOM   1360  HZ1 LYS    92      -6.994  20.657   3.911  1.00  0.00
ATOM   1361  HZ2 LYS    92      -6.432  19.115   3.781  1.00  0.00
ATOM   1362  HZ3 LYS    92      -8.029  19.410   3.679  1.00  0.00
ATOM   1363  C   LYS    92      -2.010  18.795   5.790  1.00  0.00
ATOM   1364  O   LYS    92      -1.391  19.823   5.488  1.00  0.00
ATOM   1365  N   ASP    93      -2.364  17.861   4.907  1.00  0.00
ATOM   1366  H   ASP    93      -2.844  17.034   5.252  1.00  0.00
ATOM   1367  CA  ASP    93      -2.276  18.030   3.444  1.00  0.00
ATOM   1368  HA  ASP    93      -2.521  19.064   3.201  1.00  0.00
ATOM   1369  CB  ASP    93      -0.835  17.742   2.948  1.00  0.00
ATOM   1370  HB2 ASP    93      -0.138  18.359   3.502  1.00  0.00
ATOM   1371  HB3 ASP    93      -0.610  16.686   3.111  1.00  0.00
ATOM   1372  CG  ASP    93      -0.718  18.072   1.451  1.00  0.00
ATOM   1373  OD1 ASP    93      -1.385  19.039   1.029  1.00  0.00
ATOM   1374  OD2 ASP    93      -0.159  17.306   0.631  1.00  0.00
ATOM   1375  C   ASP    93      -3.308  17.106   2.758  1.00  0.00
ATOM   1376  O   ASP    93      -3.458  15.970   3.197  1.00  0.00
ATOM   1377  N   SER    94      -4.082  17.556   1.758  1.00  0.00
ATOM   1378  H   SER    94      -3.994  18.523   1.474  1.00  0.00
ATOM   1379  CA  SER    94      -4.975  16.654   0.970  1.00  0.00
ATOM   1380  HA  SER    94      -5.004  15.672   1.436  1.00  0.00
ATOM   1381  CB  SER    94      -6.426  17.171   0.776  1.00  0.00
ATOM   1382  HB2 SER    94      -6.425  17.859  -0.072  1.00  0.00
ATOM   1383  HB3 SER    94      -7.074  16.332   0.510  1.00  0.00
ATOM   1384  OG  SER    94      -7.019  17.892   1.837  1.00  0.00
ATOM   1385  HG  SER    94      -7.471  17.265   2.439  1.00  0.00
ATOM   1386  C   SER    94      -4.519  16.459  -0.466  1.00  0.00
ATOM   1387  O   SER    94      -3.848  17.330  -1.016  1.00  0.00
ATOM   1388  N   VAL    95      -5.022  15.405  -1.112  1.00  0.00
ATOM   1389  H   VAL    95      -5.554  14.719  -0.583  1.00  0.00
ATOM   1390  CA  VAL    95      -4.783  15.146  -2.534  1.00  0.00
ATOM   1391  HA  VAL    95      -4.600  16.102  -3.023  1.00  0.00
ATOM   1392  CB  VAL    95      -3.471  14.350  -2.660  1.00  0.00
ATOM   1393  HB  VAL    95      -2.680  14.902  -2.149  1.00  0.00
ATOM   1394  CG1 VAL    95      -3.583  12.976  -2.003  1.00  0.00
ATOM   1395 HG11 VAL    95      -4.384  12.410  -2.477  1.00  0.00
ATOM   1396 HG12 VAL    95      -2.647  12.433  -2.115  1.00  0.00
ATOM   1397 HG13 VAL    95      -3.804  13.076  -0.941  1.00  0.00
ATOM   1398  CG2 VAL    95      -3.051  14.184  -4.122  1.00  0.00
ATOM   1399 HG21 VAL    95      -2.085  13.696  -4.186  1.00  0.00
ATOM   1400 HG22 VAL    95      -3.776  13.577  -4.662  1.00  0.00
ATOM   1401 HG23 VAL    95      -2.977  15.163  -4.599  1.00  0.00
ATOM   1402  C   VAL    95      -6.017  14.558  -3.238  1.00  0.00
ATOM   1403  O   VAL    95      -6.711  13.717  -2.660  1.00  0.00
ATOM   1404  N   THR    96      -6.306  15.047  -4.459  1.00  0.00
ATOM   1405  H   THR    96      -5.674  15.733  -4.868  1.00  0.00
ATOM   1406  CA  THR    96      -7.461  14.641  -5.284  1.00  0.00
ATOM   1407  HA  THR    96      -7.908  13.769  -4.815  1.00  0.00
ATOM   1408  CB  THR    96      -8.533  15.745  -5.325  1.00  0.00
ATOM   1409  HB  THR    96      -8.113  16.643  -5.784  1.00  0.00
ATOM   1410  CG2 THR    96      -9.801  15.317  -6.081  1.00  0.00
ATOM   1411 HG21 THR    96     -10.534  16.122  -6.104  1.00  0.00
ATOM   1412 HG22 THR    96      -9.549  15.063  -7.109  1.00  0.00
ATOM   1413 HG23 THR    96     -10.251  14.447  -5.613  1.00  0.00
ATOM   1414  OG1 THR    96      -8.875  16.042  -3.985  1.00  0.00
ATOM   1415  HG1 THR    96      -9.551  15.393  -3.705  1.00  0.00
ATOM   1416  C   THR    96      -7.025  14.219  -6.682  1.00  0.00
ATOM   1417  O   THR    96      -6.195  14.866  -7.315  1.00  0.00
ATOM   1418  N   PHE    97      -7.580  13.121  -7.183  1.00  0.00
ATOM   1419  H   PHE    97      -8.219  12.595  -6.596  1.00  0.00
ATOM   1420  CA  PHE    97      -7.158  12.489  -8.437  1.00  0.00
ATOM   1421  HA  PHE    97      -6.846  13.256  -9.147  1.00  0.00
ATOM   1422  CB  PHE    97      -5.977  11.539  -8.177  1.00  0.00
ATOM   1423  HB2 PHE    97      -5.597  11.199  -9.140  1.00  0.00
ATOM   1424  HB3 PHE    97      -5.166  12.070  -7.677  1.00  0.00
ATOM   1425  CG  PHE    97      -6.375  10.318  -7.374  1.00  0.00
ATOM   1426  CD1 PHE    97      -6.478  10.415  -5.979  1.00  0.00
ATOM   1427  HD1 PHE    97      -6.200  11.330  -5.474  1.00  0.00
ATOM   1428  CE1 PHE    97      -6.947   9.318  -5.239  1.00  0.00
ATOM   1429  HE1 PHE    97      -6.988   9.395  -4.163  1.00  0.00
ATOM   1430  CZ  PHE    97      -7.369   8.140  -5.888  1.00  0.00
ATOM   1431  HZ  PHE    97      -7.758   7.309  -5.316  1.00  0.00
ATOM   1432  CE2 PHE    97      -7.243   8.033  -7.283  1.00  0.00
ATOM   1433  HE2 PHE    97      -7.549   7.131  -7.796  1.00  0.00
ATOM   1434  CD2 PHE    97      -6.723   9.112  -8.017  1.00  0.00
ATOM   1435  HD2 PHE    97      -6.638   9.027  -9.088  1.00  0.00
ATOM   1436  C   PHE    97      -8.321  11.712  -9.071  1.00  0.00
ATOM   1437  O   PHE    97      -9.409  11.641  -8.487  1.00  0.00
ATOM   1438  N   ASP    98      -8.120  11.162 -10.286  1.00  0.00
ATOM   1439  H   ASP    98      -7.208  11.243 -10.714  1.00  0.00
ATOM   1440  CA  ASP    98      -9.209  10.506 -11.064  1.00  0.00
ATOM   1441  HA  ASP    98     -10.153  10.998 -10.826  1.00  0.00
ATOM   1442  CB  ASP    98      -9.052  10.592 -12.603  1.00  0.00
ATOM   1443  HB2 ASP    98      -7.996  10.479 -12.853  1.00  0.00
ATOM   1444  HB3 ASP    98      -9.574   9.746 -13.048  1.00  0.00
ATOM   1445  CG  ASP    98      -9.588  11.867 -13.278  1.00  0.00
ATOM   1446  OD1 ASP    98      -8.783  12.509 -14.003  1.00  0.00
ATOM   1447  OD2 ASP    98     -10.782  12.216 -13.081  1.00  0.00
ATOM   1448  C   ASP    98      -9.342   9.022 -10.669  1.00  0.00
ATOM   1449  O   ASP    98      -8.379   8.243 -10.652  1.00  0.00
ATOM   1450  N   VAL    99     -10.577   8.607 -10.382  1.00  0.00
ATOM   1451  H   VAL    99     -11.333   9.283 -10.362  1.00  0.00
ATOM   1452  CA  VAL    99     -10.900   7.188 -10.129  1.00  0.00
ATOM   1453  HA  VAL    99     -10.110   6.795  -9.490  1.00  0.00
ATOM   1454  CB  VAL    99     -12.170   7.100  -9.262  1.00  0.00
ATOM   1455  HB  VAL    99     -12.927   7.702  -9.746  1.00  0.00
ATOM   1456  CG1 VAL    99     -12.703   5.688  -9.014  1.00  0.00
ATOM   1457 HG11 VAL    99     -11.964   5.082  -8.494  1.00  0.00
ATOM   1458 HG12 VAL    99     -13.622   5.729  -8.435  1.00  0.00
ATOM   1459 HG13 VAL    99     -12.932   5.211  -9.965  1.00  0.00
ATOM   1460  CG2 VAL    99     -11.884   7.685  -7.872  1.00  0.00
ATOM   1461 HG21 VAL    99     -11.213   7.028  -7.319  1.00  0.00
ATOM   1462 HG22 VAL    99     -11.428   8.670  -7.945  1.00  0.00
ATOM   1463 HG23 VAL    99     -12.827   7.767  -7.332  1.00  0.00
ATOM   1464  C   VAL    99     -10.805   6.298 -11.404  1.00  0.00
ATOM   1465  O   VAL    99     -10.550   5.090 -11.316  1.00  0.00
ATOM   1466  N   SER   100     -10.773   6.893 -12.607  1.00  0.00
ATOM   1467  H   SER   100     -11.029   7.868 -12.693  1.00  0.00
ATOM   1468  CA  SER   100     -10.294   6.195 -13.804  1.00  0.00
ATOM   1469  HA  SER   100     -10.921   5.311 -13.910  1.00  0.00
ATOM   1470  CB  SER   100     -10.544   7.032 -15.076  1.00  0.00
ATOM   1471  HB2 SER   100     -10.321   6.434 -15.959  1.00  0.00
ATOM   1472  HB3 SER   100     -11.592   7.330 -15.104  1.00  0.00
ATOM   1473  OG  SER   100      -9.735   8.174 -15.096  1.00  0.00
ATOM   1474  HG  SER   100     -10.125   8.838 -15.718  1.00  0.00
ATOM   1475  C   SER   100      -8.852   5.631 -13.718  1.00  0.00
ATOM   1476  O   SER   100      -8.523   4.788 -14.553  1.00  0.00
ATOM   1477  N   LYS   101      -7.957   6.081 -12.811  1.00  0.00
ATOM   1478  H   LYS   101      -8.245   6.812 -12.163  1.00  0.00
ATOM   1479  CA  LYS   101      -6.577   5.529 -12.684  1.00  0.00
ATOM   1480  HA  LYS   101      -6.141   5.438 -13.681  1.00  0.00
ATOM   1481  CB  LYS   101      -5.724   6.507 -11.877  1.00  0.00
ATOM   1482  HB2 LYS   101      -6.260   6.822 -10.983  1.00  0.00
ATOM   1483  HB3 LYS   101      -4.801   6.014 -11.573  1.00  0.00
ATOM   1484  CG  LYS   101      -5.362   7.721 -12.725  1.00  0.00
ATOM   1485  HG2 LYS   101      -4.839   7.352 -13.606  1.00  0.00
ATOM   1486  HG3 LYS   101      -6.257   8.255 -13.049  1.00  0.00
ATOM   1487  CD  LYS   101      -4.424   8.664 -11.956  1.00  0.00
ATOM   1488  HD2 LYS   101      -4.975   9.150 -11.148  1.00  0.00
ATOM   1489  HD3 LYS   101      -3.570   8.125 -11.543  1.00  0.00
ATOM   1490  CE  LYS   101      -3.956   9.734 -12.972  1.00  0.00
ATOM   1491  HE2 LYS   101      -4.772   9.987 -13.657  1.00  0.00
ATOM   1492  HE3 LYS   101      -3.699  10.629 -12.410  1.00  0.00
ATOM   1493  NZ  LYS   101      -2.752   9.374 -13.745  1.00  0.00
ATOM   1494  HZ1 LYS   101      -2.593  10.042 -14.488  1.00  0.00
ATOM   1495  HZ2 LYS   101      -1.913   9.308 -13.171  1.00  0.00
ATOM   1496  HZ3 LYS   101      -2.853   8.472 -14.205  1.00  0.00
ATOM   1497  C   LYS   101      -6.524   4.113 -12.061  1.00  0.00
ATOM   1498  O   LYS   101      -5.459   3.505 -11.922  1.00  0.00
ATOM   1499  N   LEU   102      -7.675   3.571 -11.686  1.00  0.00
ATOM   1500  H   LEU   102      -8.526   4.078 -11.882  1.00  0.00
ATOM   1501  CA  LEU   102      -7.796   2.243 -11.113  1.00  0.00
ATOM   1502  HA  LEU   102      -6.808   1.803 -10.975  1.00  0.00
ATOM   1503  CB  LEU   102      -8.438   2.423  -9.741  1.00  0.00
ATOM   1504  HB2 LEU   102      -9.463   2.760  -9.905  1.00  0.00
ATOM   1505  HB3 LEU   102      -8.479   1.447  -9.259  1.00  0.00
ATOM   1506  CG  LEU   102      -7.755   3.426  -8.776  1.00  0.00
ATOM   1507  HG  LEU   102      -7.693   4.419  -9.223  1.00  0.00
ATOM   1508  CD1 LEU   102      -8.624   3.540  -7.529  1.00  0.00
ATOM   1509 HD11 LEU   102      -8.733   2.561  -7.062  1.00  0.00
ATOM   1510 HD12 LEU   102      -8.170   4.232  -6.820  1.00  0.00
ATOM   1511 HD13 LEU   102      -9.604   3.922  -7.812  1.00  0.00
ATOM   1512  CD2 LEU   102      -6.357   2.981  -8.330  1.00  0.00
ATOM   1513 HD21 LEU   102      -6.383   1.937  -8.018  1.00  0.00
ATOM   1514 HD22 LEU   102      -5.649   3.086  -9.152  1.00  0.00
ATOM   1515 HD23 LEU   102      -6.011   3.586  -7.492  1.00  0.00
ATOM   1516  C   LEU   102      -8.636   1.288 -11.978  1.00  0.00
ATOM   1517  O   LEU   102      -9.684   1.646 -12.547  1.00  0.00
ATOM   1518  N   LYS   103      -8.172   0.034 -11.970  1.00  0.00
ATOM   1519  H   LYS   103      -7.261  -0.111 -11.542  1.00  0.00
ATOM   1520  CA  LYS   103      -8.760  -1.128 -12.640  1.00  0.00
ATOM   1521  HA  LYS   103      -9.673  -0.836 -13.164  1.00  0.00
ATOM   1522  CB  LYS   103      -7.730  -1.653 -13.673  1.00  0.00
ATOM   1523  HB2 LYS   103      -6.945  -2.125 -13.097  1.00  0.00
ATOM   1524  HB3 LYS   103      -8.173  -2.443 -14.268  1.00  0.00
ATOM   1525  CG  LYS   103      -7.018  -0.653 -14.613  1.00  0.00
ATOM   1526  HG2 LYS   103      -7.775  -0.160 -15.221  1.00  0.00
ATOM   1527  HG3 LYS   103      -6.504   0.104 -14.018  1.00  0.00
ATOM   1528  CD  LYS   103      -5.998  -1.330 -15.565  1.00  0.00
ATOM   1529  HD2 LYS   103      -5.403  -2.073 -15.029  1.00  0.00
ATOM   1530  HD3 LYS   103      -6.564  -1.842 -16.346  1.00  0.00
ATOM   1531  CE  LYS   103      -5.059  -0.305 -16.220  1.00  0.00
ATOM   1532  HE2 LYS   103      -5.628   0.508 -16.679  1.00  0.00
ATOM   1533  HE3 LYS   103      -4.413   0.117 -15.444  1.00  0.00
ATOM   1534  NZ  LYS   103      -4.226  -0.955 -17.238  1.00  0.00
ATOM   1535  HZ1 LYS   103      -3.709  -1.732 -16.828  1.00  0.00
ATOM   1536  HZ2 LYS   103      -4.777  -1.267 -18.037  1.00  0.00
ATOM   1537  HZ3 LYS   103      -3.521  -0.305 -17.568  1.00  0.00
ATOM   1538  C   LYS   103      -9.111  -2.238 -11.636  1.00  0.00
ATOM   1539  O   LYS   103      -8.367  -2.525 -10.680  1.00  0.00
ATOM   1540  N   GLU   104     -10.285  -2.835 -11.885  1.00  0.00
ATOM   1541  H   GLU   104     -10.839  -2.515 -12.672  1.00  0.00
ATOM   1542  CA  GLU   104     -10.736  -4.038 -11.174  1.00  0.00
ATOM   1543  HA  GLU   104     -10.739  -3.812 -10.107  1.00  0.00
ATOM   1544  CB  GLU   104     -12.159  -4.460 -11.544  1.00  0.00
ATOM   1545  HB2 GLU   104     -12.779  -3.570 -11.656  1.00  0.00
ATOM   1546  HB3 GLU   104     -12.142  -4.996 -12.494  1.00  0.00
ATOM   1547  CG  GLU   104     -12.795  -5.343 -10.443  1.00  0.00
ATOM   1548  HG2 GLU   104     -12.077  -6.071 -10.063  1.00  0.00
ATOM   1549  HG3 GLU   104     -13.098  -4.699  -9.621  1.00  0.00
ATOM   1550  CD  GLU   104     -14.054  -6.056 -10.986  1.00  0.00
ATOM   1551  OE1 GLU   104     -14.034  -7.322 -11.008  1.00  0.00
ATOM   1552  OE2 GLU   104     -15.038  -5.353 -11.376  1.00  0.00
ATOM   1553  C   GLU   104      -9.760  -5.210 -11.390  1.00  0.00
ATOM   1554  O   GLU   104      -9.363  -5.828 -10.409  1.00  0.00
ATOM   1555  N   GLY   105      -9.203  -5.357 -12.604  1.00  0.00
ATOM   1556  H   GLY   105      -9.547  -4.734 -13.327  1.00  0.00
ATOM   1557  CA  GLY   105      -8.134  -6.301 -12.993  1.00  0.00
ATOM   1558  HA2 GLY   105      -8.362  -7.291 -12.595  1.00  0.00
ATOM   1559  HA3 GLY   105      -8.121  -6.385 -14.080  1.00  0.00
ATOM   1560  C   GLY   105      -6.709  -5.888 -12.536  1.00  0.00
ATOM   1561  O   GLY   105      -5.742  -6.179 -13.242  1.00  0.00
ATOM   1562  N   GLU   106      -6.520  -5.091 -11.475  1.00  0.00
ATOM   1563  H   GLU   106      -7.335  -4.829 -10.929  1.00  0.00
ATOM   1564  CA  GLU   106      -5.221  -4.534 -11.028  1.00  0.00
ATOM   1565  HA  GLU   106      -4.459  -5.267 -11.284  1.00  0.00
ATOM   1566  CB  GLU   106      -4.839  -3.270 -11.801  1.00  0.00
ATOM   1567  HB2 GLU   106      -5.028  -3.504 -12.847  1.00  0.00
ATOM   1568  HB3 GLU   106      -5.481  -2.447 -11.520  1.00  0.00
ATOM   1569  CG  GLU   106      -3.347  -2.922 -11.713  1.00  0.00
ATOM   1570  HG2 GLU   106      -3.048  -2.605 -10.712  1.00  0.00
ATOM   1571  HG3 GLU   106      -2.794  -3.840 -11.935  1.00  0.00
ATOM   1572  CD  GLU   106      -2.939  -1.846 -12.747  1.00  0.00
ATOM   1573  OE1 GLU   106      -3.600  -0.799 -12.981  1.00  0.00
ATOM   1574  OE2 GLU   106      -1.798  -1.980 -13.243  1.00  0.00
ATOM   1575  C   GLU   106      -5.127  -4.409  -9.509  1.00  0.00
ATOM   1576  O   GLU   106      -6.145  -4.410  -8.811  1.00  0.00
ATOM   1577  N   GLN   107      -3.905  -4.362  -8.966  1.00  0.00
ATOM   1578  H   GLN   107      -3.095  -4.149  -9.543  1.00  0.00
ATOM   1579  CA  GLN   107      -3.650  -4.586  -7.545  1.00  0.00
ATOM   1580  HA  GLN   107      -4.595  -4.591  -6.999  1.00  0.00
ATOM   1581  CB  GLN   107      -2.979  -5.982  -7.370  1.00  0.00
ATOM   1582  HB2 GLN   107      -3.676  -6.741  -7.725  1.00  0.00
ATOM   1583  HB3 GLN   107      -2.057  -6.040  -7.944  1.00  0.00
ATOM   1584  CG  GLN   107      -2.673  -6.208  -5.884  1.00  0.00
ATOM   1585  HG2 GLN   107      -1.862  -5.535  -5.630  1.00  0.00
ATOM   1586  HG3 GLN   107      -3.547  -5.887  -5.319  1.00  0.00
ATOM   1587  CD  GLN   107      -2.282  -7.584  -5.351  1.00  0.00
ATOM   1588  OE1 GLN   107      -2.147  -8.572  -6.030  1.00  0.00
ATOM   1589  NE2 GLN   107      -2.039  -7.669  -4.067  1.00  0.00
ATOM   1590 HE21 GLN   107      -1.789  -8.566  -3.695  1.00  0.00
ATOM   1591 HE22 GLN   107      -1.967  -6.808  -3.523  1.00  0.00
ATOM   1592  C   GLN   107      -2.800  -3.392  -7.043  1.00  0.00
ATOM   1593  O   GLN   107      -1.776  -3.061  -7.650  1.00  0.00
ATOM   1594  N   TYR   108      -3.186  -2.736  -5.937  1.00  0.00
ATOM   1595  H   TYR   108      -4.026  -3.031  -5.457  1.00  0.00
ATOM   1596  CA  TYR   108      -2.557  -1.488  -5.454  1.00  0.00
ATOM   1597  HA  TYR   108      -1.659  -1.280  -6.031  1.00  0.00
ATOM   1598  CB  TYR   108      -3.501  -0.313  -5.636  1.00  0.00
ATOM   1599  HB2 TYR   108      -4.326  -0.421  -4.951  1.00  0.00
ATOM   1600  HB3 TYR   108      -2.982   0.608  -5.368  1.00  0.00
ATOM   1601  CG  TYR   108      -4.019  -0.184  -7.037  1.00  0.00
ATOM   1602  CD1 TYR   108      -3.288   0.581  -7.957  1.00  0.00
ATOM   1603  HD1 TYR   108      -2.437   1.157  -7.628  1.00  0.00
ATOM   1604  CE1 TYR   108      -3.630   0.541  -9.319  1.00  0.00
ATOM   1605  HE1 TYR   108      -3.060   1.105 -10.040  1.00  0.00
ATOM   1606  CZ  TYR   108      -4.787  -0.152  -9.734  1.00  0.00
ATOM   1607  OH  TYR   108      -5.215  -0.107 -11.023  1.00  0.00
ATOM   1608  HH  TYR   108      -4.499   0.011 -11.675  1.00  0.00
ATOM   1609  CE2 TYR   108      -5.559  -0.861  -8.791  1.00  0.00
ATOM   1610  HE2 TYR   108      -6.430  -1.406  -9.125  1.00  0.00
ATOM   1611  CD2 TYR   108      -5.179  -0.875  -7.436  1.00  0.00
ATOM   1612  HD2 TYR   108      -5.747  -1.446  -6.714  1.00  0.00
ATOM   1613  C   TYR   108      -2.173  -1.487  -3.978  1.00  0.00
ATOM   1614  O   TYR   108      -2.713  -2.255  -3.187  1.00  0.00
ATOM   1615  N   MET   109      -1.265  -0.578  -3.618  1.00  0.00
ATOM   1616  H   MET   109      -0.976   0.095  -4.323  1.00  0.00
ATOM   1617  CA  MET   109      -0.573  -0.436  -2.331  1.00  0.00
ATOM   1618  HA  MET   109      -1.154  -0.848  -1.506  1.00  0.00
ATOM   1619  CB  MET   109       0.787  -1.139  -2.456  1.00  0.00
ATOM   1620  HB2 MET   109       1.252  -0.850  -3.402  1.00  0.00
ATOM   1621  HB3 MET   109       1.438  -0.788  -1.656  1.00  0.00
ATOM   1622  CG  MET   109       0.746  -2.668  -2.383  1.00  0.00
ATOM   1623  HG2 MET   109       0.066  -3.029  -3.152  1.00  0.00
ATOM   1624  HG3 MET   109       1.740  -3.038  -2.634  1.00  0.00
ATOM   1625  SD  MET   109       0.243  -3.423  -0.803  1.00  0.00
ATOM   1626  CE  MET   109       1.636  -3.008   0.301  1.00  0.00
ATOM   1627  HE1 MET   109       1.552  -3.579   1.227  1.00  0.00
ATOM   1628  HE2 MET   109       2.582  -3.248  -0.182  1.00  0.00
ATOM   1629  HE3 MET   109       1.619  -1.944   0.539  1.00  0.00
ATOM   1630  C   MET   109      -0.283   1.056  -2.098  1.00  0.00
ATOM   1631  O   MET   109      -0.020   1.750  -3.083  1.00  0.00
ATOM   1632  N   PHE   110      -0.298   1.527  -0.841  1.00  0.00
ATOM   1633  H   PHE   110      -0.502   0.866  -0.096  1.00  0.00
ATOM   1634  CA  PHE   110      -0.028   2.916  -0.413  1.00  0.00
ATOM   1635  HA  PHE   110       0.495   3.415  -1.227  1.00  0.00
ATOM   1636  CB  PHE   110      -1.334   3.698  -0.128  1.00  0.00
ATOM   1637  HB2 PHE   110      -1.081   4.759  -0.102  1.00  0.00
ATOM   1638  HB3 PHE   110      -2.004   3.561  -0.975  1.00  0.00
ATOM   1639  CG  PHE   110      -2.096   3.375   1.157  1.00  0.00
ATOM   1640  CD1 PHE   110      -1.726   3.982   2.377  1.00  0.00
ATOM   1641  HD1 PHE   110      -0.919   4.702   2.397  1.00  0.00
ATOM   1642  CE1 PHE   110      -2.369   3.620   3.575  1.00  0.00
ATOM   1643  HE1 PHE   110      -2.069   4.073   4.511  1.00  0.00
ATOM   1644  CZ  PHE   110      -3.386   2.646   3.559  1.00  0.00
ATOM   1645  HZ  PHE   110      -3.872   2.357   4.480  1.00  0.00
ATOM   1646  CE2 PHE   110      -3.760   2.038   2.348  1.00  0.00
ATOM   1647  HE2 PHE   110      -4.528   1.279   2.336  1.00  0.00
ATOM   1648  CD2 PHE   110      -3.127   2.413   1.150  1.00  0.00
ATOM   1649  HD2 PHE   110      -3.397   1.919   0.227  1.00  0.00
ATOM   1650  C   PHE   110       0.901   2.927   0.811  1.00  0.00
ATOM   1651  O   PHE   110       0.975   1.926   1.519  1.00  0.00
ATOM   1652  N   PHE   111       1.695   3.987   1.015  1.00  0.00
ATOM   1653  H   PHE   111       1.658   4.732   0.322  1.00  0.00
ATOM   1654  CA  PHE   111       2.802   4.056   2.008  1.00  0.00
ATOM   1655  HA  PHE   111       2.457   3.626   2.943  1.00  0.00
ATOM   1656  CB  PHE   111       4.039   3.255   1.510  1.00  0.00
ATOM   1657  HB2 PHE   111       4.925   3.565   2.063  1.00  0.00
ATOM   1658  HB3 PHE   111       3.877   2.209   1.762  1.00  0.00
ATOM   1659  CG  PHE   111       4.330   3.314   0.009  1.00  0.00
ATOM   1660  CD1 PHE   111       3.467   2.664  -0.895  1.00  0.00
ATOM   1661  HD1 PHE   111       2.698   2.007  -0.534  1.00  0.00
ATOM   1662  CE1 PHE   111       3.572   2.860  -2.278  1.00  0.00
ATOM   1663  HE1 PHE   111       2.851   2.412  -2.950  1.00  0.00
ATOM   1664  CZ  PHE   111       4.677   3.551  -2.789  1.00  0.00
ATOM   1665  HZ  PHE   111       4.807   3.637  -3.859  1.00  0.00
ATOM   1666  CE2 PHE   111       5.635   4.080  -1.906  1.00  0.00
ATOM   1667  HE2 PHE   111       6.510   4.563  -2.308  1.00  0.00
ATOM   1668  CD2 PHE   111       5.447   3.994  -0.507  1.00  0.00
ATOM   1669  HD2 PHE   111       6.161   4.425   0.177  1.00  0.00
ATOM   1670  C   PHE   111       3.247   5.498   2.323  1.00  0.00
ATOM   1671  O   PHE   111       2.966   6.395   1.534  1.00  0.00
ATOM   1672  N   CYS   112       3.986   5.738   3.442  1.00  0.00
ATOM   1673  HN  CYS   112       4.137   4.927   4.051  1.00  0.00
ATOM   1674  CA  CYS   112       4.905   6.771   3.534  1.00  0.00
ATOM   1675  HA  CYS   112       4.619   7.577   2.851  1.00  0.00
ATOM   1676  CB  CYS   112       4.979   7.287   4.986  1.00  0.00
ATOM   1677  HB3 CYS   112       5.269   6.497   5.693  1.00  0.00
ATOM   1678  HB2 CYS   112       3.999   7.688   5.285  1.00  0.00
ATOM   1679  SG  CYS   112       6.123   8.715   5.201  1.00  0.00
ATOM   1680  C   CYS   112       6.344   6.440   2.845  1.00  0.00
ATOM   1681  O   CYS   112       6.714   5.284   3.009  1.00  0.00
ATOM   1682  N   THR   113       7.057   7.355   2.169  1.00  0.00
ATOM   1683  H   THR   113       6.643   8.275   2.050  1.00  0.00
ATOM   1684  CA  THR   113       8.344   7.047   1.464  1.00  0.00
ATOM   1685  HA  THR   113       8.439   5.965   1.392  1.00  0.00
ATOM   1686  CB  THR   113       8.410   7.601   0.034  1.00  0.00
ATOM   1687  HB  THR   113       9.392   7.401  -0.398  1.00  0.00
ATOM   1688  CG2 THR   113       7.378   6.918  -0.830  1.00  0.00
ATOM   1689 HG21 THR   113       7.535   7.197  -1.871  1.00  0.00
ATOM   1690 HG22 THR   113       7.511   5.847  -0.733  1.00  0.00
ATOM   1691 HG23 THR   113       6.377   7.183  -0.506  1.00  0.00
ATOM   1692  OG1 THR   113       8.138   8.980  -0.023  1.00  0.00
ATOM   1693  HG1 THR   113       8.654   9.336  -0.770  1.00  0.00
ATOM   1694  C   THR   113       9.626   7.515   2.148  1.00  0.00
ATOM   1695  O   THR   113      10.735   7.309   1.649  1.00  0.00
ATOM   1696  N   PHE   114       9.495   8.142   3.304  1.00  0.00
ATOM   1697  H   PHE   114       8.567   8.258   3.684  1.00  0.00
ATOM   1698  CA  PHE   114      10.636   8.470   4.129  1.00  0.00
ATOM   1699  HA  PHE   114      11.283   9.106   3.534  1.00  0.00
ATOM   1700  CB  PHE   114      10.070   9.310   5.278  1.00  0.00
ATOM   1701  HB2 PHE   114       9.331   9.989   4.847  1.00  0.00
ATOM   1702  HB3 PHE   114       9.526   8.642   5.934  1.00  0.00
ATOM   1703  CG  PHE   114      11.004  10.174   6.107  1.00  0.00
ATOM   1704  CD1 PHE   114      12.007   9.594   6.903  1.00  0.00
ATOM   1705  HD1 PHE   114      12.168   8.531   6.882  1.00  0.00
ATOM   1706  CE1 PHE   114      12.777  10.388   7.769  1.00  0.00
ATOM   1707  HE1 PHE   114      13.548   9.933   8.376  1.00  0.00
ATOM   1708  CZ  PHE   114      12.529  11.768   7.870  1.00  0.00
ATOM   1709  HZ  PHE   114      13.118  12.377   8.542  1.00  0.00
ATOM   1710  CE2 PHE   114      11.518  12.357   7.092  1.00  0.00
ATOM   1711  HE2 PHE   114      11.326  13.418   7.165  1.00  0.00
ATOM   1712  CD2 PHE   114      10.759  11.559   6.217  1.00  0.00
ATOM   1713  HD2 PHE   114       9.970  12.016   5.641  1.00  0.00
ATOM   1714  C   PHE   114      11.372   7.155   4.522  1.00  0.00
ATOM   1715  O   PHE   114      10.722   6.133   4.781  1.00  0.00
ATOM   1716  N   PRO   115      12.715   7.173   4.613  1.00  0.00
ATOM   1717  CD  PRO   115      13.545   8.279   4.176  1.00  0.00
ATOM   1718  HD2 PRO   115      13.548   9.076   4.919  1.00  0.00
ATOM   1719  HD3 PRO   115      13.238   8.655   3.202  1.00  0.00
ATOM   1720  CG  PRO   115      14.936   7.687   4.061  1.00  0.00
ATOM   1721  HG2 PRO   115      15.705   8.456   4.115  1.00  0.00
ATOM   1722  HG3 PRO   115      15.026   7.111   3.139  1.00  0.00
ATOM   1723  CB  PRO   115      14.957   6.757   5.266  1.00  0.00
ATOM   1724  HB2 PRO   115      15.017   7.344   6.186  1.00  0.00
ATOM   1725  HB3 PRO   115      15.769   6.032   5.207  1.00  0.00
ATOM   1726  CA  PRO   115      13.586   6.092   5.113  1.00  0.00
ATOM   1727  HA  PRO   115      13.656   5.314   4.357  1.00  0.00
ATOM   1728  C   PRO   115      13.137   5.465   6.426  1.00  0.00
ATOM   1729  O   PRO   115      12.838   6.209   7.346  1.00  0.00
ATOM   1730  N   GLY   116      13.073   4.141   6.593  1.00  0.00
ATOM   1731  H   GLY   116      13.360   3.526   5.837  1.00  0.00
ATOM   1732  CA  GLY   116      12.625   3.507   7.859  1.00  0.00
ATOM   1733  HA2 GLY   116      12.953   2.469   7.867  1.00  0.00
ATOM   1734  HA3 GLY   116      13.115   4.012   8.690  1.00  0.00
ATOM   1735  C   GLY   116      11.122   3.519   8.188  1.00  0.00
ATOM   1736  O   GLY   116      10.614   2.556   8.766  1.00  0.00
ATOM   1737  N   HIS   117      10.380   4.551   7.777  1.00  0.00
ATOM   1738  H   HIS   117      10.859   5.340   7.352  1.00  0.00
ATOM   1739  CA  HIS   117       8.947   4.594   7.902  1.00  0.00
ATOM   1740  HA  HIS   117       8.652   4.462   8.949  1.00  0.00
ATOM   1741  CB  HIS   117       8.523   5.975   7.445  1.00  0.00
ATOM   1742  HB2 HIS   117       8.683   6.076   6.356  1.00  0.00
ATOM   1743  HB3 HIS   117       7.435   5.963   7.616  1.00  0.00
ATOM   1744  CG  HIS   117       9.068   7.188   8.156  1.00  0.00
ATOM   1745  ND1 HIS   117       8.330   8.373   8.152  1.00  0.00
ATOM   1746  CE1 HIS   117       9.011   9.288   8.858  1.00  0.00
ATOM   1747  HE1 HIS   117       8.782  10.352   8.884  1.00  0.00
ATOM   1748  NE2 HIS   117      10.165   8.742   9.274  1.00  0.00
ATOM   1749  HE2 HIS   117      10.929   9.203   9.791  1.00  0.00
ATOM   1750  CD2 HIS   117      10.220   7.431   8.868  1.00  0.00
ATOM   1751  HD2 HIS   117      11.074   6.812   9.123  1.00  0.00
ATOM   1752  C   HIS   117       8.270   3.450   7.103  1.00  0.00
ATOM   1753  O   HIS   117       7.331   2.860   7.626  1.00  0.00
ATOM   1754  N   SER   118       8.742   3.088   5.897  1.00  0.00
ATOM   1755  H   SER   118       9.462   3.664   5.476  1.00  0.00
ATOM   1756  CA  SER   118       8.061   2.132   4.992  1.00  0.00
ATOM   1757  HA  SER   118       7.038   2.482   4.848  1.00  0.00
ATOM   1758  CB  SER   118       8.732   2.102   3.615  1.00  0.00
ATOM   1759  HB2 SER   118       9.689   1.583   3.690  1.00  0.00
ATOM   1760  HB3 SER   118       8.100   1.565   2.905  1.00  0.00
ATOM   1761  OG  SER   118       8.964   3.422   3.154  1.00  0.00
ATOM   1762  HG  SER   118       8.130   3.921   3.124  1.00  0.00
ATOM   1763  C   SER   118       7.951   0.703   5.507  1.00  0.00
ATOM   1764  O   SER   118       7.103  -0.043   5.005  1.00  0.00
ATOM   1765  N   ALA   119       8.798   0.363   6.489  1.00  0.00
ATOM   1766  H   ALA   119       9.520   1.024   6.732  1.00  0.00
ATOM   1767  CA  ALA   119       8.703  -0.830   7.305  1.00  0.00
ATOM   1768  HA  ALA   119       8.714  -1.683   6.628  1.00  0.00
ATOM   1769  CB  ALA   119       9.937  -0.948   8.189  1.00  0.00
ATOM   1770  HB1 ALA   119       9.924  -0.204   8.987  1.00  0.00
ATOM   1771  HB2 ALA   119       9.895  -1.940   8.615  1.00  0.00
ATOM   1772  HB3 ALA   119      10.849  -0.856   7.597  1.00  0.00
ATOM   1773  C   ALA   119       7.421  -0.960   8.140  1.00  0.00
ATOM   1774  O   ALA   119       7.005  -2.097   8.316  1.00  0.00
ATOM   1775  N   LEU   120       6.735   0.104   8.583  1.00  0.00
ATOM   1776  H   LEU   120       7.143   1.022   8.445  1.00  0.00
ATOM   1777  CA  LEU   120       5.447   0.009   9.306  1.00  0.00
ATOM   1778  HA  LEU   120       5.130  -1.032   9.386  1.00  0.00
ATOM   1779  CB  LEU   120       5.575   0.565  10.736  1.00  0.00
ATOM   1780  HB2 LEU   120       5.743   1.639  10.665  1.00  0.00
ATOM   1781  HB3 LEU   120       4.614   0.425  11.233  1.00  0.00
ATOM   1782  CG  LEU   120       6.671  -0.036  11.629  1.00  0.00
ATOM   1783  HG  LEU   120       7.627  -0.131  11.111  1.00  0.00
ATOM   1784  CD1 LEU   120       6.791   0.808  12.893  1.00  0.00
ATOM   1785 HD11 LEU   120       7.678   0.510  13.450  1.00  0.00
ATOM   1786 HD12 LEU   120       6.872   1.865  12.642  1.00  0.00
ATOM   1787 HD13 LEU   120       5.912   0.689  13.526  1.00  0.00
ATOM   1788  CD2 LEU   120       6.175  -1.368  12.172  1.00  0.00
ATOM   1789 HD21 LEU   120       5.287  -1.242  12.793  1.00  0.00
ATOM   1790 HD22 LEU   120       5.924  -2.031  11.347  1.00  0.00
ATOM   1791 HD23 LEU   120       6.961  -1.831  12.768  1.00  0.00
ATOM   1792  C   LEU   120       4.353   0.781   8.539  1.00  0.00
ATOM   1793  O   LEU   120       3.226   0.299   8.379  1.00  0.00
ATOM   1794  N   MET   121       4.701   1.920   7.935  1.00  0.00
ATOM   1795  H   MET   121       5.660   2.240   8.007  1.00  0.00
ATOM   1796  CA  MET   121       3.739   2.792   7.257  1.00  0.00
ATOM   1797  HA  MET   121       2.786   2.689   7.774  1.00  0.00
ATOM   1798  CB  MET   121       4.156   4.243   7.434  1.00  0.00
ATOM   1799  HB2 MET   121       5.091   4.448   6.909  1.00  0.00
ATOM   1800  HB3 MET   121       3.371   4.884   7.036  1.00  0.00
ATOM   1801  CG  MET   121       4.319   4.507   8.930  1.00  0.00
ATOM   1802  HG2 MET   121       3.381   4.270   9.450  1.00  0.00
ATOM   1803  HG3 MET   121       5.110   3.883   9.366  1.00  0.00
ATOM   1804  SD  MET   121       4.783   6.186   9.198  1.00  0.00
ATOM   1805  CE  MET   121       3.223   6.995   8.718  1.00  0.00
ATOM   1806  HE1 MET   121       3.003   7.809   9.421  1.00  0.00
ATOM   1807  HE2 MET   121       3.257   7.385   7.690  1.00  0.00
ATOM   1808  HE3 MET   121       2.420   6.250   8.783  1.00  0.00
ATOM   1809  C   MET   121       3.427   2.431   5.794  1.00  0.00
ATOM   1810  O   MET   121       3.786   3.165   4.880  1.00  0.00
ATOM   1811  N   LYS   122       2.668   1.347   5.577  1.00  0.00
ATOM   1812  H   LYS   122       2.428   0.808   6.403  1.00  0.00
ATOM   1813  CA  LYS   122       2.109   0.867   4.284  1.00  0.00
ATOM   1814  HA  LYS   122       1.912   1.738   3.669  1.00  0.00
ATOM   1815  CB  LYS   122       3.165   0.011   3.540  1.00  0.00
ATOM   1816  HB2 LYS   122       2.849  -0.075   2.499  1.00  0.00
ATOM   1817  HB3 LYS   122       4.097   0.578   3.528  1.00  0.00
ATOM   1818  CG  LYS   122       3.512  -1.409   4.029  1.00  0.00
ATOM   1819  HG2 LYS   122       2.637  -2.051   3.915  1.00  0.00
ATOM   1820  HG3 LYS   122       4.289  -1.796   3.369  1.00  0.00
ATOM   1821  CD  LYS   122       4.002  -1.514   5.476  1.00  0.00
ATOM   1822  HD2 LYS   122       4.757  -0.757   5.683  1.00  0.00
ATOM   1823  HD3 LYS   122       3.148  -1.367   6.139  1.00  0.00
ATOM   1824  CE  LYS   122       4.576  -2.919   5.709  1.00  0.00
ATOM   1825  HE2 LYS   122       3.856  -3.636   5.312  1.00  0.00
ATOM   1826  HE3 LYS   122       5.508  -3.043   5.148  1.00  0.00
ATOM   1827  NZ  LYS   122       4.772  -3.201   7.151  1.00  0.00
ATOM   1828  HZ1 LYS   122       3.937  -2.981   7.695  1.00  0.00
ATOM   1829  HZ2 LYS   122       4.952  -4.182   7.333  1.00  0.00
ATOM   1830  HZ3 LYS   122       5.559  -2.693   7.542  1.00  0.00
ATOM   1831  C   LYS   122       0.770   0.107   4.429  1.00  0.00
ATOM   1832  O   LYS   122       0.591  -0.585   5.429  1.00  0.00
ATOM   1833  N   GLY   123      -0.112   0.139   3.423  1.00  0.00
ATOM   1834  H   GLY   123       0.130   0.699   2.611  1.00  0.00
ATOM   1835  CA  GLY   123      -1.420  -0.542   3.394  1.00  0.00
ATOM   1836  HA2 GLY   123      -1.357  -1.507   3.900  1.00  0.00
ATOM   1837  HA3 GLY   123      -2.142   0.072   3.930  1.00  0.00
ATOM   1838  C   GLY   123      -1.948  -0.769   1.966  1.00  0.00
ATOM   1839  O   GLY   123      -1.293  -0.414   0.984  1.00  0.00
ATOM   1840  N   THR   124      -3.111  -1.417   1.841  1.00  0.00
ATOM   1841  H   THR   124      -3.633  -1.625   2.680  1.00  0.00
ATOM   1842  CA  THR   124      -3.605  -1.998   0.572  1.00  0.00
ATOM   1843  HA  THR   124      -2.797  -2.036  -0.159  1.00  0.00
ATOM   1844  CB  THR   124      -4.142  -3.445   0.731  1.00  0.00
ATOM   1845  HB  THR   124      -4.550  -3.755  -0.232  1.00  0.00
ATOM   1846  CG2 THR   124      -3.011  -4.440   1.064  1.00  0.00
ATOM   1847 HG21 THR   124      -2.421  -4.079   1.906  1.00  0.00
ATOM   1848 HG22 THR   124      -3.422  -5.420   1.305  1.00  0.00
ATOM   1849 HG23 THR   124      -2.358  -4.531   0.194  1.00  0.00
ATOM   1850  OG1 THR   124      -5.238  -3.452   1.648  1.00  0.00
ATOM   1851  HG1 THR   124      -6.002  -3.907   1.254  1.00  0.00
ATOM   1852  C   THR   124      -4.715  -1.156  -0.035  1.00  0.00
ATOM   1853  O   THR   124      -5.416  -0.435   0.677  1.00  0.00
ATOM   1854  N   LEU   125      -4.887  -1.248  -1.357  1.00  0.00
ATOM   1855  H   LEU   125      -4.292  -1.869  -1.899  1.00  0.00
ATOM   1856  CA  LEU   125      -5.978  -0.586  -2.071  1.00  0.00
ATOM   1857  HA  LEU   125      -6.817  -0.480  -1.385  1.00  0.00
ATOM   1858  CB  LEU   125      -5.457   0.834  -2.405  1.00  0.00
ATOM   1859  HB2 LEU   125      -5.252   1.346  -1.464  1.00  0.00
ATOM   1860  HB3 LEU   125      -4.512   0.758  -2.945  1.00  0.00
ATOM   1861  CG  LEU   125      -6.448   1.665  -3.234  1.00  0.00
ATOM   1862  HG  LEU   125      -7.462   1.347  -2.993  1.00  0.00
ATOM   1863  CD1 LEU   125      -6.354   3.151  -2.887  1.00  0.00
ATOM   1864 HD11 LEU   125      -6.466   3.294  -1.815  1.00  0.00
ATOM   1865 HD12 LEU   125      -5.392   3.549  -3.204  1.00  0.00
ATOM   1866 HD13 LEU   125      -7.152   3.692  -3.396  1.00  0.00
ATOM   1867  CD2 LEU   125      -6.210   1.483  -4.740  1.00  0.00
ATOM   1868 HD21 LEU   125      -6.955   2.050  -5.295  1.00  0.00
ATOM   1869 HD22 LEU   125      -5.220   1.841  -5.019  1.00  0.00
ATOM   1870 HD23 LEU   125      -6.328   0.446  -5.035  1.00  0.00
ATOM   1871  C   LEU   125      -6.482  -1.426  -3.278  1.00  0.00
ATOM   1872  O   LEU   125      -5.673  -2.084  -3.947  1.00  0.00
ATOM   1873  N   THR   126      -7.817  -1.387  -3.481  1.00  0.00
ATOM   1874  H   THR   126      -8.321  -0.826  -2.809  1.00  0.00
ATOM   1875  CA  THR   126      -8.702  -2.215  -4.343  1.00  0.00
ATOM   1876  HA  THR   126      -8.105  -2.760  -5.074  1.00  0.00
ATOM   1877  CB  THR   126      -9.457  -3.267  -3.463  1.00  0.00
ATOM   1878  HB  THR   126     -10.140  -2.746  -2.791  1.00  0.00
ATOM   1879  CG2 THR   126     -10.255  -4.337  -4.201  1.00  0.00
ATOM   1880 HG21 THR   126     -11.071  -3.880  -4.759  1.00  0.00
ATOM   1881 HG22 THR   126      -9.601  -4.884  -4.881  1.00  0.00
ATOM   1882 HG23 THR   126     -10.682  -5.031  -3.476  1.00  0.00
ATOM   1883  OG1 THR   126      -8.533  -3.964  -2.659  1.00  0.00
ATOM   1884  HG1 THR   126      -8.383  -3.394  -1.876  1.00  0.00
ATOM   1885  C   THR   126      -9.662  -1.290  -5.110  1.00  0.00
ATOM   1886  O   THR   126      -9.994  -0.214  -4.605  1.00  0.00
ATOM   1887  N   LEU   127     -10.141  -1.721  -6.280  1.00  0.00
ATOM   1888  H   LEU   127      -9.823  -2.623  -6.624  1.00  0.00
ATOM   1889  CA  LEU   127     -11.255  -1.087  -6.991  1.00  0.00
ATOM   1890  HA  LEU   127     -11.661  -0.279  -6.383  1.00  0.00
ATOM   1891  CB  LEU   127     -10.603  -0.479  -8.240  1.00  0.00
ATOM   1892  HB2 LEU   127      -9.745   0.114  -7.919  1.00  0.00
ATOM   1893  HB3 LEU   127     -10.214  -1.317  -8.819  1.00  0.00
ATOM   1894  CG  LEU   127     -11.414   0.383  -9.235  1.00  0.00
ATOM   1895  HG  LEU   127     -10.726   0.635 -10.042  1.00  0.00
ATOM   1896  CD1 LEU   127     -12.635  -0.275  -9.898  1.00  0.00
ATOM   1897 HD11 LEU   127     -13.011   0.382 -10.681  1.00  0.00
ATOM   1898 HD12 LEU   127     -12.359  -1.230 -10.346  1.00  0.00
ATOM   1899 HD13 LEU   127     -13.435  -0.421  -9.177  1.00  0.00
ATOM   1900  CD2 LEU   127     -11.889   1.694  -8.582  1.00  0.00
ATOM   1901 HD21 LEU   127     -11.085   2.147  -8.007  1.00  0.00
ATOM   1902 HD22 LEU   127     -12.220   2.391  -9.353  1.00  0.00
ATOM   1903 HD23 LEU   127     -12.726   1.491  -7.916  1.00  0.00
ATOM   1904  C   LEU   127     -12.413  -2.077  -7.335  1.00  0.00
ATOM   1905  O   LEU   127     -12.190  -3.097  -7.997  1.00  0.00
ATOM   1906  N   LYS   128     -13.669  -1.759  -6.944  1.00  0.00
ATOM   1907  H   LYS   128     -13.786  -0.912  -6.397  1.00  0.00
ATOM   1908  CA  LYS   128     -14.886  -2.619  -7.175  1.00  0.00
ATOM   1909  HA  LYS   128     -14.559  -3.500  -7.727  1.00  0.00
ATOM   1910  CB  LYS   128     -15.373  -3.188  -5.789  1.00  0.00
ATOM   1911  HB2 LYS   128     -16.165  -3.924  -5.952  1.00  0.00
ATOM   1912  HB3 LYS   128     -14.536  -3.707  -5.312  1.00  0.00
ATOM   1913  CG  LYS   128     -15.893  -2.105  -4.817  1.00  0.00
ATOM   1914  HG2 LYS   128     -15.132  -1.340  -4.680  1.00  0.00
ATOM   1915  HG3 LYS   128     -16.750  -1.654  -5.299  1.00  0.00
ATOM   1916  CD  LYS   128     -16.325  -2.599  -3.427  1.00  0.00
ATOM   1917  HD2 LYS   128     -17.074  -3.381  -3.549  1.00  0.00
ATOM   1918  HD3 LYS   128     -15.455  -3.000  -2.904  1.00  0.00
ATOM   1919  CE  LYS   128     -16.917  -1.401  -2.635  1.00  0.00
ATOM   1920  HE2 LYS   128     -17.047  -1.682  -1.586  1.00  0.00
ATOM   1921  HE3 LYS   128     -16.180  -0.594  -2.655  1.00  0.00
ATOM   1922  NZ  LYS   128     -18.208  -0.875  -3.198  1.00  0.00
ATOM   1923  HZ1 LYS   128     -18.953  -1.565  -3.180  1.00  0.00
ATOM   1924  HZ2 LYS   128     -18.515  -0.072  -2.654  1.00  0.00
ATOM   1925  HZ3 LYS   128     -18.103  -0.540  -4.158  1.00  0.00
ATOM   1926  C   LYS   128     -16.015  -2.043  -8.102  1.00  0.00
ATOM   1927  O   LYS   128     -16.116  -0.818  -8.387  1.00  0.00
ATOM   1928  OXT LYS   128     -16.868  -2.873  -8.497  1.00  0.00
ATOM   1929  Cu2 CU2   129       6.630   8.832   7.218  1.00  0.00
ATOM   1930  O   WAT   130      28.473  21.725   4.610  1.00  0.00
ATOM   1931  H1  WAT   130      28.239  21.339   3.737  1.00  0.00
ATOM   1932  H2  WAT   130      29.427  21.935   4.431  1.00  0.00
ATOM   1933  O   WAT   131     -19.078  25.575 -22.913  1.00  0.00
ATOM   1934  H1  WAT   131     -19.851  26.181 -23.006  1.00  0.00
ATOM   1935  H2  WAT   131     -18.354  26.180 -23.146  1.00  0.00
ATOM   1936  O   WAT   132      37.881  28.626  29.905  1.00  0.00
ATOM   1937  H1  WAT   132      38.519  28.431  30.614  1.00  0.00
ATOM   1938  H2  WAT   132      37.042  28.630  30.378  1.00  0.00
ATOM   1939  O   WAT   133      21.506  32.311  13.188  1.00  0.00
ATOM   1940  H1  WAT   133      22.156  31.880  12.569  1.00  0.00
ATOM   1941  H2  WAT   133      21.452  33.194  12.739  1.00  0.00
ATOM   1942  O   WAT   134      33.498  28.894  35.111  1.00  0.00
ATOM   1943  H1  WAT   134      33.480  29.878  35.012  1.00  0.00
ATOM   1944  H2  WAT   134      33.404  28.639  34.172  1.00  0.00
ATOM   1945  O   WAT   135       5.136  22.558  26.300  1.00  0.00
ATOM   1946  H1  WAT   135       5.677  22.543  27.121  1.00  0.00
ATOM   1947  H2  WAT   135       5.392  23.447  25.955  1.00  0.00
ATOM   1948  O   WAT   136      15.171 -11.823  -0.240  1.00  0.00
ATOM   1949  H1  WAT   136      16.094 -12.024   0.016  1.00  0.00
ATOM   1950  H2  WAT   136      14.705 -12.577   0.208  1.00  0.00
ATOM   1951  O   WAT   137      42.034  18.951  25.983  1.00  0.00
ATOM   1952  H1  WAT   137      41.688  18.219  25.435  1.00  0.00
ATOM   1953  H2  WAT   137      41.887  19.712  25.384  1.00  0.00
ATOM   1954  O   WAT   138      17.858  19.093  29.598  1.00  0.00
ATOM   1955  H1  WAT   138      18.391  19.299  28.789  1.00  0.00
ATOM   1956  H2  WAT   138      16.958  19.123  29.190  1.00  0.00
ATOM   1957  O   WAT   139      39.284  22.651  29.345  1.00  0.00
ATOM   1958  H1  WAT   139      38.451  22.876  29.813  1.00  0.00
ATOM   1959  H2  WAT   139      38.926  22.219  28.543  1.00  0.00
ATOM   1960  O   WAT   140      32.760  23.652 -27.039  1.00  0.00
ATOM   1961  H1  WAT   140      32.678  24.610 -26.820  1.00  0.00
ATOM   1962  H2  WAT   140      31.899  23.541 -27.522  1.00  0.00
ATOM   1963  O   WAT   141      41.766   9.742  20.802  1.00  0.00
ATOM   1964  H1  WAT   141      42.520   9.800  21.407  1.00  0.00
ATOM   1965  H2  WAT   141      42.225   9.656  19.941  1.00  0.00
ATOM   1966  O   WAT   142     -25.987  12.616  35.698  1.00  0.00
ATOM   1967  H1  WAT   142     -25.229  12.729  35.088  1.00  0.00
ATOM   1968  H2  WAT   142     -25.513  12.328  36.507  1.00  0.00
ATOM   1969  O   WAT   143     -28.087  -4.864  22.807  1.00  0.00
ATOM   1970  H1  WAT   143     -28.118  -5.567  23.495  1.00  0.00
ATOM   1971  H2  WAT   143     -28.258  -4.077  23.372  1.00  0.00
ATOM   1972  O   WAT   144      17.923  15.824   7.750  1.00  0.00
ATOM   1973  H1  WAT   144      17.544  15.408   6.942  1.00  0.00
ATOM   1974  H2  WAT   144      17.999  15.034   8.328  1.00  0.00
ATOM   1975  O   WAT   145      18.056  12.193  11.474  1.00  0.00
ATOM   1976  H1  WAT   145      17.424  11.641  10.976  1.00  0.00
ATOM   1977  H2  WAT   145      17.778  12.020  12.394  1.00  0.00
ATOM   1978  O   WAT   146     -12.464  17.492  18.442  1.00  0.00
ATOM   1979  H1  WAT   146     -12.332  18.092  17.690  1.00  0.00
ATOM   1980  H2  WAT   146     -12.198  16.631  18.060  1.00  0.00
ATOM   1981  O   WAT   147      16.226   2.632  20.446  1.00  0.00
ATOM   1982  H1  WAT   147      15.265   2.739  20.288  1.00  0.00
ATOM   1983  H2  WAT   147      16.219   2.516  21.431  1.00  0.00
ATOM   1984  O   WAT   148      26.046  35.482  26.041  1.00  0.00
ATOM   1985  H1  WAT   148      25.164  35.712  26.394  1.00  0.00
ATOM   1986  H2  WAT   148      25.795  35.212  25.131  1.00  0.00
ATOM   1987  O   WAT   149     -28.718  11.207 -17.707  1.00  0.00
ATOM   1988  H1  WAT   149     -29.165  10.452 -18.177  1.00  0.00
ATOM   1989  H2  WAT   149     -28.600  10.784 -16.826  1.00  0.00
ATOM   1990  O   WAT   150     -23.283  24.511  20.470  1.00  0.00
ATOM   1991  H1  WAT   150     -24.058  23.974  20.707  1.00  0.00
ATOM   1992  H2  WAT   150     -22.575  23.831  20.495  1.00  0.00
ATOM   1993  O   WAT   151      34.879 -13.532  19.132  1.00  0.00
ATOM   1994  H1  WAT   151      34.750 -14.498  19.234  1.00  0.00
ATOM   1995  H2  WAT   151      34.112 -13.322  18.549  1.00  0.00
ATOM   1996  O   WAT   152      18.410   8.235   3.744  1.00  0.00
ATOM   1997  H1  WAT   152      18.695   7.415   3.299  1.00  0.00
ATOM   1998  H2  WAT   152      18.592   8.021   4.676  1.00  0.00
ATOM   1999  O   WAT   153      32.628  32.962  38.302  1.00  0.00
ATOM   2000  H1  WAT   153      33.291  33.683  38.380  1.00  0.00
ATOM   2001  H2  WAT   153      32.043  33.327  37.612  1.00  0.00
ATOM   2002  O   WAT   154      19.984  26.398 -13.532  1.00  0.00
ATOM   2003  H1  WAT   154      20.847  25.935 -13.640  1.00  0.00
ATOM   2004  H2  WAT   154      20.168  27.224 -14.026  1.00  0.00
ATOM   2005  O   WAT   155     -26.868  22.873  39.530  1.00  0.00
ATOM   2006  H1  WAT   155     -26.475  23.754  39.393  1.00  0.00
ATOM   2007  H2  WAT   155     -27.502  22.869  38.756  1.00  0.00
ATOM   2008  O   WAT   156      35.993  33.437  18.880  1.00  0.00
ATOM   2009  H1  WAT   156      35.284  32.867  18.523  1.00  0.00
ATOM   2010  H2  WAT   156      35.563  34.310  18.839  1.00  0.00
ATOM   2011  O   WAT   157       6.272  18.412 -25.311  1.00  0.00
ATOM   2012  H1  WAT   157       5.822  18.844 -24.560  1.00  0.00
ATOM   2013  H2  WAT   157       6.936  19.095 -25.538  1.00  0.00
ATOM   2014  O   WAT   158      16.230  -0.666   6.987  1.00  0.00
ATOM   2015  H1  WAT   158      16.352  -1.018   7.896  1.00  0.00
ATOM   2016  H2  WAT   158      16.088  -1.508   6.496  1.00  0.00
ATOM   2017  O   WAT   159       1.650   3.857 -22.978  1.00  0.00
ATOM   2018  H1  WAT   159       1.396   3.950 -22.029  1.00  0.00
ATOM   2019  H2  WAT   159       1.239   2.999 -23.181  1.00  0.00
ATOM   2020  O   WAT   160      25.038  10.693  13.656  1.00  0.00
ATOM   2021  H1  WAT   160      24.839  11.026  14.561  1.00  0.00
ATOM   2022  H2  WAT   160      24.575   9.830  13.693  1.00  0.00
ATOM   2023  O   WAT   161      31.133 -15.357  18.021  1.00  0.00
ATOM   2024  H1  WAT   161      31.233 -16.316  18.009  1.00  0.00
ATOM   2025  H2  WAT   161      30.148 -15.267  18.022  1.00  0.00
ATOM   2026  O   WAT   162      28.534  31.764  25.112  1.00  0.00
ATOM   2027  H1  WAT   162      28.081  31.116  25.676  1.00  0.00
ATOM   2028  H2  WAT   162      28.496  32.566  25.674  1.00  0.00
ATOM   2029  O   WAT   163      25.005  37.072   6.090  1.00  0.00
ATOM   2030  H1  WAT   163      25.220  37.137   7.054  1.00  0.00
ATOM   2031  H2  WAT   163      25.289  36.148   5.929  1.00  0.00
ATOM   2032  O   WAT   164      31.425  15.736   9.707  1.00  0.00
ATOM   2033  H1  WAT   164      31.329  14.797   9.466  1.00  0.00
ATOM   2034  H2  WAT   164      30.607  15.879  10.230  1.00  0.00
ATOM   2035  O   WAT   165     -24.832  35.849   1.295  1.00  0.00
ATOM   2036  H1  WAT   165     -25.438  35.511   0.615  1.00  0.00
ATOM   2037  H2  WAT   165     -23.968  35.747   0.839  1.00  0.00
ATOM   2038  O   WAT   166      29.546   1.803  29.950  1.00  0.00
ATOM   2039  H1  WAT   166      29.290   2.031  29.024  1.00  0.00
ATOM   2040  H2  WAT   166      29.685   2.724  30.290  1.00  0.00
ATOM   2041  O   WAT   167      -2.438  29.863  22.127  1.00  0.00
ATOM   2042  H1  WAT   167      -3.109  30.580  22.157  1.00  0.00
ATOM   2043  H2  WAT   167      -2.108  29.969  21.206  1.00  0.00
ATOM   2044  O   WAT   168      13.374  21.595  30.484  1.00  0.00
ATOM   2045  H1  WAT   168      12.878  21.447  29.653  1.00  0.00
ATOM   2046  H2  WAT   168      13.401  20.682  30.839  1.00  0.00
ATOM   2047  O   WAT   169     -16.904  29.535  37.467  1.00  0.00
ATOM   2048  H1  WAT   169     -17.514  28.860  37.855  1.00  0.00
ATOM   2049  H2  WAT   169     -16.099  28.984  37.375  1.00  0.00
ATOM   2050  O   WAT   170     -25.571  20.931  18.033  1.00  0.00
ATOM   2051  H1  WAT   170     -24.594  20.997  17.949  1.00  0.00
ATOM   2052  H2  WAT   170     -25.657  20.449  18.869  1.00  0.00
ATOM   2053  O   WAT   171     -25.699  -7.443  22.790  1.00  0.00
ATOM   2054  H1  WAT   171     -24.947  -6.937  23.178  1.00  0.00
ATOM   2055  H2  WAT   171     -26.448  -7.043  23.258  1.00  0.00
ATOM   2056  O   WAT   172      -5.762 -16.164 -22.597  1.00  0.00
ATOM   2057  H1  WAT   172      -5.515 -15.569 -21.856  1.00  0.00
ATOM   2058  H2  WAT   172      -5.427 -17.022 -22.229  1.00  0.00
ATOM   2059  O   WAT   173      19.292  27.385   5.105  1.00  0.00
ATOM   2060  H1  WAT   173      19.802  27.874   5.773  1.00  0.00
ATOM   2061  H2  WAT   173      19.844  27.555   4.304  1.00  0.00
ATOM   2062  O   WAT   174      28.040 -14.559   0.749  1.00  0.00
ATOM   2063  H1  WAT   174      28.183 -14.984  -0.126  1.00  0.00
ATOM   2064  H2  WAT   174      27.134 -14.200   0.611  1.00  0.00
ATOM   2065  O   WAT   175      21.758   7.629  29.362  1.00  0.00
ATOM   2066  H1  WAT   175      21.670   7.108  30.196  1.00  0.00
ATOM   2067  H2  WAT   175      22.233   6.972  28.809  1.00  0.00
ATOM   2068  O   WAT   176       7.791  23.562  19.542  1.00  0.00
ATOM   2069  H1  WAT   176       7.437  22.995  18.829  1.00  0.00
ATOM   2070  H2  WAT   176       7.353  23.155  20.316  1.00  0.00
ATOM   2071  O   WAT   177       8.849 -17.701  -2.814  1.00  0.00
ATOM   2072  H1  WAT   177       9.613 -17.294  -2.351  1.00  0.00
ATOM   2073  H2  WAT   177       8.163 -17.620  -2.126  1.00  0.00
ATOM   2074  O   WAT   178      16.028  27.387  10.858  1.00  0.00
ATOM   2075  H1  WAT   178      16.667  26.638  10.980  1.00  0.00
ATOM   2076  H2  WAT   178      16.248  27.613   9.918  1.00  0.00
ATOM   2077  O   WAT   179      10.441  21.294 -23.299  1.00  0.00
ATOM   2078  H1  WAT   179      10.650  21.604 -22.386  1.00  0.00
ATOM   2079  H2  WAT   179       9.901  20.498 -23.074  1.00  0.00
ATOM   2080  O   WAT   180      11.959  34.155  15.382  1.00  0.00
ATOM   2081  H1  WAT   180      12.659  33.870  14.758  1.00  0.00
ATOM   2082  H2  WAT   180      12.486  34.351  16.178  1.00  0.00
ATOM   2083  O   WAT   181      37.099 -17.722  38.673  1.00  0.00
ATOM   2084  H1  WAT   181      37.914 -17.152  38.722  1.00  0.00
ATOM   2085  H2  WAT   181      37.362 -18.387  39.360  1.00  0.00
ATOM   2086  O   WAT   182     -25.284  19.983  -6.452  1.00  0.00
ATOM   2087  H1  WAT   182     -25.802  19.922  -5.630  1.00  0.00
ATOM   2088  H2  WAT   182     -24.916  19.064  -6.499  1.00  0.00
ATOM   2089  O   WAT   183      26.475  12.396  18.547  1.00  0.00
ATOM   2090  H1  WAT   183      27.322  12.507  19.016  1.00  0.00
ATOM   2091  H2  WAT   183      25.975  11.853  19.181  1.00  0.00
ATOM   2092  O   WAT   184      25.400 -18.357   7.271  1.00  0.00
ATOM   2093  H1  WAT   184      25.447 -17.744   6.521  1.00  0.00
ATOM   2094  H2  WAT   184      25.179 -17.749   8.008  1.00  0.00
ATOM   2095  O   WAT   185      10.214   8.273  26.717  1.00  0.00
ATOM   2096  H1  WAT   185       9.426   7.733  26.553  1.00  0.00
ATOM   2097  H2  WAT   185      10.550   8.383  25.794  1.00  0.00
ATOM   2098  O   WAT   186       5.579  14.488  26.653  1.00  0.00
ATOM   2099  H1  WAT   186       5.085  14.828  27.449  1.00  0.00
ATOM   2100  H2  WAT   186       6.312  15.169  26.673  1.00  0.00
ATOM   2101  O   WAT   187      26.004  31.784  34.997  1.00  0.00
ATOM   2102  H1  WAT   187      26.377  31.284  34.249  1.00  0.00
ATOM   2103  H2  WAT   187      26.529  32.609  34.954  1.00  0.00
ATOM   2104  O   WAT   188      29.037  16.791  19.981  1.00  0.00
ATOM   2105  H1  WAT   188      28.190  16.303  20.127  1.00  0.00
ATOM   2106  H2  WAT   188      29.616  16.281  20.592  1.00  0.00
ATOM   2107  O   WAT   189      17.052 -16.470  28.585  1.00  0.00
ATOM   2108  H1  WAT   189      16.358 -16.057  28.048  1.00  0.00
ATOM   2109  H2  WAT   189      16.571 -16.674  29.403  1.00  0.00
ATOM   2110  O   WAT   190      29.432 -18.910  -1.598  1.00  0.00
ATOM   2111  H1  WAT   190      28.614 -19.423  -1.447  1.00  0.00
ATOM   2112  H2  WAT   190      29.623 -18.586  -0.702  1.00  0.00
ATOM   2113  O   WAT   191      16.170  37.223  23.509  1.00  0.00
ATOM   2114  H1  WAT   191      16.433  36.670  24.273  1.00  0.00
ATOM   2115  H2  WAT   191      16.561  36.704  22.775  1.00  0.00
ATOM   2116  O   WAT   192      33.284  31.241   1.364  1.00  0.00
ATOM   2117  H1  WAT   192      34.166  31.605   1.632  1.00  0.00
ATOM   2118  H2  WAT   192      32.709  31.826   1.919  1.00  0.00
ATOM   2119  O   WAT   193     -23.552  24.489  40.002  1.00  0.00
ATOM   2120  H1  WAT   193     -23.025  24.793  40.774  1.00  0.00
ATOM   2121  H2  WAT   193     -24.150  25.261  39.895  1.00  0.00
ATOM   2122  O   WAT   194      38.417 -16.786 -15.267  1.00  0.00
ATOM   2123  H1  WAT   194      38.635 -16.032 -14.686  1.00  0.00
ATOM   2124  H2  WAT   194      37.646 -16.383 -15.764  1.00  0.00
ATOM   2125  O   WAT   195      22.879  30.888  31.057  1.00  0.00
ATOM   2126  H1  WAT   195      22.645  31.515  31.758  1.00  0.00
ATOM   2127  H2  WAT   195      22.979  31.484  30.288  1.00  0.00
ATOM   2128  O   WAT   196      10.622 -19.580  11.621  1.00  0.00
ATOM   2129  H1  WAT   196      11.535 -19.259  11.412  1.00  0.00
ATOM   2130  H2  WAT   196      10.442 -20.031  10.748  1.00  0.00
ATOM   2131  O   WAT   197      15.098  27.954 -24.301  1.00  0.00
ATOM   2132  H1  WAT   197      14.168  27.887 -24.557  1.00  0.00
ATOM   2133  H2  WAT   197      15.557  27.508 -25.028  1.00  0.00
ATOM   2134  O   WAT   198      19.649   7.563  19.190  1.00  0.00
ATOM   2135  H1  WAT   198      19.555   8.247  18.497  1.00  0.00
ATOM   2136  H2  WAT   198      18.772   7.642  19.631  1.00  0.00
ATOM   2137  O   WAT   199      27.673  14.145  15.812  1.00  0.00
ATOM   2138  H1  WAT   199      28.265  14.258  15.050  1.00  0.00
ATOM   2139  H2  WAT   199      28.170  14.647  16.500  1.00  0.00
ATOM   2140  O   WAT   200      35.090  38.344  28.101  1.00  0.00
ATOM   2141  H1  WAT   200      35.409  38.529  27.190  1.00  0.00
ATOM   2142  H2  WAT   200      34.116  38.505  27.950  1.00  0.00
ATOM   2143  O   WAT   201       9.875   7.124  16.266  1.00  0.00
ATOM   2144  H1  WAT   201       9.117   7.730  16.220  1.00  0.00
ATOM   2145  H2  WAT   201      10.392   7.530  16.991  1.00  0.00
ATOM   2146  O   WAT   202       1.981  23.377  36.497  1.00  0.00
ATOM   2147  H1  WAT   202       1.045  23.602  36.343  1.00  0.00
ATOM   2148  H2  WAT   202       2.399  24.230  36.202  1.00  0.00
ATOM   2149  O   WAT   203      28.849 -18.612   9.510  1.00  0.00
ATOM   2150  H1  WAT   203      29.750 -18.389   9.869  1.00  0.00
ATOM   2151  H2  WAT   203      29.018 -18.348   8.567  1.00  0.00
ATOM   2152  O   WAT   204       6.343  18.502  30.711  1.00  0.00
ATOM   2153  H1  WAT   204       5.826  18.508  31.549  1.00  0.00
ATOM   2154  H2  WAT   204       7.077  19.102  30.967  1.00  0.00
ATOM   2155  O   WAT   205       0.649 -14.764   8.102  1.00  0.00
ATOM   2156  H1  WAT   205       0.326 -13.828   8.085  1.00  0.00
ATOM   2157  H2  WAT   205       0.875 -14.834   9.055  1.00  0.00
ATOM   2158  O   WAT   206      22.319  12.145  14.292  1.00  0.00
ATOM   2159  H1  WAT   206      21.502  11.606  14.257  1.00  0.00
ATOM   2160  H2  WAT   206      22.444  12.317  13.330  1.00  0.00
ATOM   2161  O   WAT   207       2.306 -13.977   3.530  1.00  0.00
ATOM   2162  H1  WAT   207       1.789 -14.384   4.275  1.00  0.00
ATOM   2163  H2  WAT   207       2.124 -14.625   2.822  1.00  0.00
ATOM   2164  O   WAT   208       9.088  11.755  25.275  1.00  0.00
ATOM   2165  H1  WAT   208       9.658  11.551  24.514  1.00  0.00
ATOM   2166  H2  WAT   208       8.238  11.944  24.848  1.00  0.00
ATOM   2167  O   WAT   209      13.298 -12.699   5.154  1.00  0.00
ATOM   2168  H1  WAT   209      13.002 -13.483   4.644  1.00  0.00
ATOM   2169  H2  WAT   209      13.127 -12.990   6.063  1.00  0.00
ATOM   2170  O   WAT   210      12.023  18.307  18.121  1.00  0.00
ATOM   2171  H1  WAT   210      11.469  19.016  18.511  1.00  0.00
ATOM   2172  H2  WAT   210      12.606  18.831  17.541  1.00  0.00
ATOM   2173  O   WAT   211       7.583  35.163 -14.407  1.00  0.00
ATOM   2174  H1  WAT   211       6.787  35.007 -14.953  1.00  0.00
ATOM   2175  H2  WAT   211       7.772  36.104 -14.656  1.00  0.00
ATOM   2176  O   WAT   212     -14.224  18.656 -17.781  1.00  0.00
ATOM   2177  H1  WAT   212     -14.772  18.529 -18.599  1.00  0.00
ATOM   2178  H2  WAT   212     -13.582  19.320 -18.149  1.00  0.00
ATOM   2179  O   WAT   213      37.212  27.217  -6.777  1.00  0.00
ATOM   2180  H1  WAT   213      37.084  27.924  -7.447  1.00  0.00
ATOM   2181  H2  WAT   213      36.292  26.924  -6.637  1.00  0.00
ATOM   2182  O   WAT   214      15.176  24.172   7.468  1.00  0.00
ATOM   2183  H1  WAT   214      16.099  24.097   7.776  1.00  0.00
ATOM   2184  H2  WAT   214      14.830  24.852   8.079  1.00  0.00
ATOM   2185  O   WAT   215      20.962  -9.023  -5.658  1.00  0.00
ATOM   2186  H1  WAT   215      20.413  -8.245  -5.866  1.00  0.00
ATOM   2187  H2  WAT   215      20.315  -9.634  -5.287  1.00  0.00
ATOM   2188  O   WAT   216      23.623  39.891   1.928  1.00  0.00
ATOM   2189  H1  WAT   216      24.220  40.646   1.802  1.00  0.00
ATOM   2190  H2  WAT   216      23.978  39.525   2.774  1.00  0.00
ATOM   2191  O   WAT   217      24.293  -0.291  -6.077  1.00  0.00
ATOM   2192  H1  WAT   217      25.070  -0.745  -6.477  1.00  0.00
ATOM   2193  H2  WAT   217      23.864   0.053  -6.880  1.00  0.00
ATOM   2194  O   WAT   218       6.538   8.809  22.994  1.00  0.00
ATOM   2195  H1  WAT   218       5.794   9.253  22.501  1.00  0.00
ATOM   2196  H2  WAT   218       6.027   8.569  23.813  1.00  0.00
ATOM   2197  O   WAT   219      15.551  19.479 -14.830  1.00  0.00
ATOM   2198  H1  WAT   219      15.077  18.908 -14.180  1.00  0.00
ATOM   2199  H2  WAT   219      15.391  20.357 -14.411  1.00  0.00
ATOM   2200  O   WAT   220      31.436  36.769   6.688  1.00  0.00
ATOM   2201  H1  WAT   220      30.981  36.122   7.276  1.00  0.00
ATOM   2202  H2  WAT   220      30.969  36.580   5.844  1.00  0.00
ATOM   2203  O   WAT   221      11.261   1.202  19.748  1.00  0.00
ATOM   2204  H1  WAT   221      11.788   1.104  18.917  1.00  0.00
ATOM   2205  H2  WAT   221      10.448   1.603  19.378  1.00  0.00
ATOM   2206  O   WAT   222      37.308  12.909  12.725  1.00  0.00
ATOM   2207  H1  WAT   222      37.002  12.136  13.239  1.00  0.00
ATOM   2208  H2  WAT   222      38.032  13.231  13.302  1.00  0.00
ATOM   2209  O   WAT   223     -28.167  19.731 -18.458  1.00  0.00
ATOM   2210  H1  WAT   223     -28.585  19.137 -17.795  1.00  0.00
ATOM   2211  H2  WAT   223     -27.225  19.491 -18.313  1.00  0.00
ATOM   2212  O   WAT   224      21.286  16.716  13.428  1.00  0.00
ATOM   2213  H1  WAT   224      20.499  16.142  13.312  1.00  0.00
ATOM   2214  H2  WAT   224      21.043  17.451  12.825  1.00  0.00
ATOM   2215  O   WAT   225      20.213  35.465  -2.187  1.00  0.00
ATOM   2216  H1  WAT   225      19.472  34.842  -2.385  1.00  0.00
ATOM   2217  H2  WAT   225      20.302  35.278  -1.219  1.00  0.00
ATOM   2218  O   WAT   226      33.046  14.087 -17.493  1.00  0.00
ATOM   2219  H1  WAT   226      33.399  15.001 -17.447  1.00  0.00
ATOM   2220  H2  WAT   226      32.464  14.155 -18.271  1.00  0.00
ATOM   2221  O   WAT   227     -23.074 -19.869   5.056  1.00  0.00
ATOM   2222  H1  WAT   227     -22.119 -19.849   4.841  1.00  0.00
ATOM   2223  H2  WAT   227     -23.429 -19.333   4.320  1.00  0.00
ATOM   2224  O   WAT   228       3.868  -0.741  19.122  1.00  0.00
ATOM   2225  H1  WAT   228       3.697  -1.088  20.036  1.00  0.00
ATOM   2226  H2  WAT   228       4.029  -1.590  18.658  1.00  0.00
ATOM   2227  O   WAT   229      34.830 -15.098   7.888  1.00  0.00
ATOM   2228  H1  WAT   229      33.898 -15.134   7.584  1.00  0.00
ATOM   2229  H2  WAT   229      35.008 -14.132   7.741  1.00  0.00
ATOM   2230  O   WAT   230      18.149  27.671  18.815  1.00  0.00
ATOM   2231  H1  WAT   230      17.676  28.039  18.025  1.00  0.00
ATOM   2232  H2  WAT   230      17.597  28.076  19.520  1.00  0.00
ATOM   2233  O   WAT   231       8.596  23.344  -9.771  1.00  0.00
ATOM   2234  H1  WAT   231       7.783  23.364 -10.329  1.00  0.00
ATOM   2235  H2  WAT   231       8.817  22.387  -9.843  1.00  0.00
ATOM   2236  O   WAT   232      23.140  32.644  -8.022  1.00  0.00
ATOM   2237  H1  WAT   232      23.011  32.075  -7.231  1.00  0.00
ATOM   2238  H2  WAT   232      24.080  32.451  -8.223  1.00  0.00
ATOM   2239  O   WAT   233      24.879  20.307  -6.491  1.00  0.00
ATOM   2240  H1  WAT   233      25.598  19.884  -7.021  1.00  0.00
ATOM   2241  H2  WAT   233      24.165  19.646  -6.671  1.00  0.00
ATOM   2242  O   WAT   234      41.104  38.434  -3.987  1.00  0.00
ATOM   2243  H1  WAT   234      41.225  38.378  -4.971  1.00  0.00
ATOM   2244  H2  WAT   234      40.292  37.878  -3.906  1.00  0.00
ATOM   2245  O   WAT   235      23.555  -0.033  30.494  1.00  0.00
ATOM   2246  H1  WAT   235      24.331  -0.435  30.024  1.00  0.00
ATOM   2247  H2  WAT   235      23.996   0.157  31.359  1.00  0.00
ATOM   2248  O   WAT   236      27.200  18.032   0.911  1.00  0.00
ATOM   2249  H1  WAT   236      26.575  17.467   0.402  1.00  0.00
ATOM   2250  H2  WAT   236      27.679  18.460   0.169  1.00  0.00
ATOM   2251  O   WAT   237      15.981  28.097  13.482  1.00  0.00
ATOM   2252  H1  WAT   237      15.838  28.100  12.500  1.00  0.00
ATOM   2253  H2  WAT   237      16.202  27.140  13.587  1.00  0.00
ATOM   2254  O   WAT   238      32.052  29.969  -3.069  1.00  0.00
ATOM   2255  H1  WAT   238      32.952  29.597  -2.965  1.00  0.00
ATOM   2256  H2  WAT   238      31.518  29.162  -2.893  1.00  0.00
ATOM   2257  O   WAT   239      29.507  -8.644  11.801  1.00  0.00
ATOM   2258  H1  WAT   239      28.607  -8.971  12.067  1.00  0.00
ATOM   2259  H2  WAT   239      29.843  -9.495  11.408  1.00  0.00
ATOM   2260  O   WAT   240      -4.235  28.378  -5.624  1.00  0.00
ATOM   2261  H1  WAT   240      -3.656  28.656  -6.373  1.00  0.00
ATOM   2262  H2  WAT   240      -3.804  27.531  -5.388  1.00  0.00
ATOM   2263  O   WAT   241      15.280  11.825  16.277  1.00  0.00
ATOM   2264  H1  WAT   241      16.133  12.334  16.287  1.00  0.00
ATOM   2265  H2  WAT   241      14.646  12.560  16.276  1.00  0.00
ATOM   2266  O   WAT   242      28.371 -13.340   9.070  1.00  0.00
ATOM   2267  H1  WAT   242      29.222 -13.370   9.567  1.00  0.00
ATOM   2268  H2  WAT   242      28.212 -12.369   9.076  1.00  0.00
ATOM   2269  O   WAT   243      28.962 -18.607  14.358  1.00  0.00
ATOM   2270  H1  WAT   243      29.136 -18.347  15.288  1.00  0.00
ATOM   2271  H2  WAT   243      29.518 -17.955  13.889  1.00  0.00
ATOM   2272  O   WAT   244       1.438  21.351   2.450  1.00  0.00
ATOM   2273  H1  WAT   244       1.567  22.292   2.732  1.00  0.00
ATOM   2274  H2  WAT   244       2.383  21.063   2.484  1.00  0.00
ATOM   2275  O   WAT   245     -18.742  16.758  22.292  1.00  0.00
ATOM   2276  H1  WAT   245     -18.801  15.806  22.578  1.00  0.00
ATOM   2277  H2  WAT   245     -19.174  17.165  23.083  1.00  0.00
ATOM   2278  O   WAT   246      40.665 -12.185  17.884  1.00  0.00
ATOM   2279  H1  WAT   246      40.415 -12.853  17.201  1.00  0.00
ATOM   2280  H2  WAT   246      39.795 -11.950  18.243  1.00  0.00
ATOM   2281  O   WAT   247      35.825  36.676   9.534  1.00  0.00
ATOM   2282  H1  WAT   247      35.874  36.675   8.558  1.00  0.00
ATOM   2283  H2  WAT   247      36.704  36.278   9.746  1.00  0.00
ATOM   2284  O   WAT   248      34.280  31.346 -22.924  1.00  0.00
ATOM   2285  H1  WAT   248      35.051  31.248 -23.510  1.00  0.00
ATOM   2286  H2  WAT   248      33.541  31.206 -23.543  1.00  0.00
ATOM   2287  O   WAT   249      25.751  10.777   9.576  1.00  0.00
ATOM   2288  H1  WAT   249      25.163  10.363  10.247  1.00  0.00
ATOM   2289  H2  WAT   249      25.638  10.140   8.838  1.00  0.00
ATOM   2290  O   WAT   250     -22.039  26.587  33.506  1.00  0.00
ATOM   2291  H1  WAT   250     -22.983  26.860  33.406  1.00  0.00
ATOM   2292  H2  WAT   250     -22.197  25.726  33.984  1.00  0.00
ATOM   2293  O   WAT   251      27.442  40.431  -8.518  1.00  0.00
ATOM   2294  H1  WAT   251      26.941  41.263  -8.742  1.00  0.00
ATOM   2295  H2  WAT   251      27.042  39.831  -9.182  1.00  0.00
ATOM   2296  O   WAT   252      20.053  11.655  -7.042  1.00  0.00
ATOM   2297  H1  WAT   252      19.953  12.038  -6.132  1.00  0.00
ATOM   2298  H2  WAT   252      20.706  10.958  -6.851  1.00  0.00
ATOM   2299  O   WAT   253       4.923  36.225   6.507  1.00  0.00
ATOM   2300  H1  WAT   253       5.293  36.670   5.712  1.00  0.00
ATOM   2301  H2  WAT   253       5.503  36.594   7.204  1.00  0.00
ATOM   2302  O   WAT   254       2.302  21.665  31.069  1.00  0.00
ATOM   2303  H1  WAT   254       2.006  20.942  31.678  1.00  0.00
ATOM   2304  H2  WAT   254       3.263  21.650  31.283  1.00  0.00
ATOM   2305  O   WAT   255       6.756  31.087  34.001  1.00  0.00
ATOM   2306  H1  WAT   255       7.383  31.820  33.849  1.00  0.00
ATOM   2307  H2  WAT   255       7.369  30.348  34.164  1.00  0.00
ATOM   2308  O   WAT   256      36.387  -6.977  -6.287  1.00  0.00
ATOM   2309  H1  WAT   256      35.703  -6.358  -6.643  1.00  0.00
ATOM   2310  H2  WAT   256      36.919  -6.333  -5.767  1.00  0.00
ATOM   2311  O   WAT   257      23.945   9.342 -12.878  1.00  0.00
ATOM   2312  H1  WAT   257      23.117   9.362 -12.354  1.00  0.00
ATOM   2313  H2  WAT   257      24.442   8.653 -12.397  1.00  0.00
ATOM   2314  O   WAT   258      11.708  -7.966  15.817  1.00  0.00
ATOM   2315  H1  WAT   258      11.056  -7.860  15.080  1.00  0.00
ATOM   2316  H2  WAT   258      11.523  -7.122  16.294  1.00  0.00
ATOM   2317  O   WAT   259      28.944  24.126  14.491  1.00  0.00
ATOM   2318  H1  WAT   259      29.103  25.088  14.653  1.00  0.00
ATOM   2319  H2  WAT   259      29.563  23.991  13.741  1.00  0.00
ATOM   2320  O   WAT   260      31.659  28.257   2.866  1.00  0.00
ATOM   2321  H1  WAT   260      32.103  27.527   2.386  1.00  0.00
ATOM   2322  H2  WAT   260      32.195  28.319   3.667  1.00  0.00
ATOM   2323  O   WAT   261      30.302  28.841 -12.468  1.00  0.00
ATOM   2324  H1  WAT   261      30.369  29.740 -12.058  1.00  0.00
ATOM   2325  H2  WAT   261      29.427  28.573 -12.112  1.00  0.00
ATOM   2326  O   WAT   262      24.423  13.096  29.611  1.00  0.00
ATOM   2327  H1  WAT   262      24.533  12.331  30.198  1.00  0.00
ATOM   2328  H2  WAT   262      23.625  13.516  29.978  1.00  0.00
ATOM   2329  O   WAT   263      41.274 -12.641  12.002  1.00  0.00
ATOM   2330  H1  WAT   263      41.533 -12.929  11.106  1.00  0.00
ATOM   2331  H2  WAT   263      41.795 -13.313  12.527  1.00  0.00
ATOM   2332  O   WAT   264      13.670  35.190 -20.089  1.00  0.00
ATOM   2333  H1  WAT   264      12.851  34.930 -19.590  1.00  0.00
ATOM   2334  H2  WAT   264      13.379  36.097 -20.355  1.00  0.00
ATOM   2335  O   WAT   265      28.403   2.040  20.780  1.00  0.00
ATOM   2336  H1  WAT   265      28.753   2.093  19.856  1.00  0.00
ATOM   2337  H2  WAT   265      27.656   1.410  20.621  1.00  0.00
ATOM   2338  O   WAT   266       5.378 -12.697  34.083  1.00  0.00
ATOM   2339  H1  WAT   266       5.300 -13.086  33.173  1.00  0.00
ATOM   2340  H2  WAT   266       4.438 -12.403  34.186  1.00  0.00
ATOM   2341  O   WAT   267     -20.140  37.411  -3.484  1.00  0.00
ATOM   2342  H1  WAT   267     -19.444  37.164  -2.836  1.00  0.00
ATOM   2343  H2  WAT   267     -20.860  37.646  -2.866  1.00  0.00
ATOM   2344  O   WAT   268      27.524  40.227   3.118  1.00  0.00
ATOM   2345  H1  WAT   268      27.685  39.789   2.246  1.00  0.00
ATOM   2346  H2  WAT   268      26.889  39.595   3.508  1.00  0.00
ATOM   2347  O   WAT   269      12.453  29.821  -1.135  1.00  0.00
ATOM   2348  H1  WAT   269      13.309  29.897  -0.669  1.00  0.00
ATOM   2349  H2  WAT   269      12.119  28.978  -0.748  1.00  0.00
ATOM   2350  O   WAT   270      11.090  34.857  32.005  1.00  0.00
ATOM   2351  H1  WAT   270      10.218  35.126  31.666  1.00  0.00
ATOM   2352  H2  WAT   270      11.622  34.879  31.189  1.00  0.00
ATOM   2353  O   WAT   271      25.627  28.078 -20.084  1.00  0.00
ATOM   2354  H1  WAT   271      26.423  28.504 -19.701  1.00  0.00
ATOM   2355  H2  WAT   271      24.946  28.754 -19.848  1.00  0.00
ATOM   2356  O   WAT   272      39.806  33.130 -14.765  1.00  0.00
ATOM   2357  H1  WAT   272      39.885  33.380 -15.696  1.00  0.00
ATOM   2358  H2  WAT   272      40.691  32.803 -14.554  1.00  0.00
ATOM   2359  O   WAT   273      25.496  25.021  12.812  1.00  0.00
ATOM   2360  H1  WAT   273      24.846  24.783  13.495  1.00  0.00
ATOM   2361  H2  WAT   273      25.771  24.154  12.483  1.00  0.00
ATOM   2362  O   WAT   274      27.758  10.162  13.705  1.00  0.00
ATOM   2363  H1  WAT   274      26.835  10.429  13.490  1.00  0.00
ATOM   2364  H2  WAT   274      27.882  10.663  14.539  1.00  0.00
ATOM   2365  O   WAT   275     -22.821 -12.305  13.938  1.00  0.00
ATOM   2366  H1  WAT   275     -21.979 -12.051  13.507  1.00  0.00
ATOM   2367  H2  WAT   275     -23.349 -12.548  13.140  1.00  0.00
ATOM   2368  O   WAT   276       6.477  26.098  -3.886  1.00  0.00
ATOM   2369  H1  WAT   276       7.278  26.168  -4.453  1.00  0.00
ATOM   2370  H2  WAT   276       5.798  26.361  -4.547  1.00  0.00
ATOM   2371  O   WAT   277      29.711  -6.852 -12.560  1.00  0.00
ATOM   2372  H1  WAT   277      30.255  -7.446 -13.147  1.00  0.00
ATOM   2373  H2  WAT   277      29.031  -7.516 -12.289  1.00  0.00
ATOM   2374  O   WAT   278      -7.394  29.883 -15.929  1.00  0.00
ATOM   2375  H1  WAT   278      -6.573  30.267 -16.319  1.00  0.00
ATOM   2376  H2  WAT   278      -7.146  28.923 -16.004  1.00  0.00
ATOM   2377  O   WAT   279      20.365  28.949 -14.628  1.00  0.00
ATOM   2378  H1  WAT   279      20.945  29.029 -13.834  1.00  0.00
ATOM   2379  H2  WAT   279      21.020  28.576 -15.263  1.00  0.00
ATOM   2380  O   WAT   280      22.625  23.271   6.002  1.00  0.00
ATOM   2381  H1  WAT   280      22.945  22.350   6.189  1.00  0.00
ATOM   2382  H2  WAT   280      23.473  23.751   6.176  1.00  0.00
ATOM   2383  O   WAT   281      -4.035  22.256  28.614  1.00  0.00
ATOM   2384  H1  WAT   281      -4.024  21.330  28.287  1.00  0.00
ATOM   2385  H2  WAT   281      -4.636  22.670  27.970  1.00  0.00
ATOM   2386  O   WAT   282      31.172  -7.264   8.136  1.00  0.00
ATOM   2387  H1  WAT   282      31.369  -6.695   7.364  1.00  0.00
ATOM   2388  H2  WAT   282      31.513  -6.690   8.857  1.00  0.00
ATOM   2389  O   WAT   283      25.845  -8.238  10.057  1.00  0.00
ATOM   2390  H1  WAT   283      25.611  -8.740  10.880  1.00  0.00
ATOM   2391  H2  WAT   283      25.320  -7.417  10.239  1.00  0.00
ATOM   2392  O   WAT   284      -0.724  24.155  11.955  1.00  0.00
ATOM   2393  H1  WAT   284      -0.138  23.816  12.664  1.00  0.00
ATOM   2394  H2  WAT   284      -1.293  23.372  11.812  1.00  0.00
ATOM   2395  O   WAT   285      23.526  -3.682  -8.636  1.00  0.00
ATOM   2396  H1  WAT   285      24.117  -3.435  -9.368  1.00  0.00
ATOM   2397  H2  WAT   285      24.128  -3.598  -7.872  1.00  0.00
ATOM   2398  O   WAT   286     -25.211  11.790  -4.539  1.00  0.00
ATOM   2399  H1  WAT   286     -25.849  12.324  -5.056  1.00  0.00
ATOM   2400  H2  WAT   286     -24.365  12.121  -4.912  1.00  0.00
ATOM   2401  O   WAT   287      29.608 -16.649  34.231  1.00  0.00
ATOM   2402  H1  WAT   287      29.817 -17.087  33.353  1.00  0.00
ATOM   2403  H2  WAT   287      30.415 -16.087  34.299  1.00  0.00
ATOM   2404  O   WAT   288     -26.350  15.542   3.119  1.00  0.00
ATOM   2405  H1  WAT   288     -26.464  15.474   4.101  1.00  0.00
ATOM   2406  H2  WAT   288     -27.274  15.325   2.850  1.00  0.00
ATOM   2407  O   WAT   289      27.897  15.954  -4.023  1.00  0.00
ATOM   2408  H1  WAT   289      27.215  15.280  -3.879  1.00  0.00
ATOM   2409  H2  WAT   289      28.374  15.954  -3.185  1.00  0.00
ATOM   2410  O   WAT   290      24.192  21.192   6.709  1.00  0.00
ATOM   2411  H1  WAT   290      24.207  20.420   6.083  1.00  0.00
ATOM   2412  H2  WAT   290      25.143  21.475   6.577  1.00  0.00
ATOM   2413  O   WAT   291       9.742  18.203   2.220  1.00  0.00
ATOM   2414  H1  WAT   291       8.960  17.918   1.693  1.00  0.00
ATOM   2415  H2  WAT   291      10.376  17.499   1.989  1.00  0.00
ATOM   2416  O   WAT   292       6.178  28.382  23.515  1.00  0.00
ATOM   2417  H1  WAT   292       6.701  29.014  22.957  1.00  0.00
ATOM   2418  H2  WAT   292       6.926  27.939  23.986  1.00  0.00
ATOM   2419  O   WAT   293      23.571   6.025   0.647  1.00  0.00
ATOM   2420  H1  WAT   293      22.774   6.460   1.031  1.00  0.00
ATOM   2421  H2  WAT   293      23.236   5.830  -0.253  1.00  0.00
ATOM   2422  O   WAT   294      18.596   4.808  12.600  1.00  0.00
ATOM   2423  H1  WAT   294      18.756   4.015  12.051  1.00  0.00
ATOM   2424  H2  WAT   294      19.083   4.542  13.417  1.00  0.00
ATOM   2425  O   WAT   295      35.552  23.087   9.241  1.00  0.00
ATOM   2426  H1  WAT   295      36.399  22.727   9.590  1.00  0.00
ATOM   2427  H2  WAT   295      35.120  23.334  10.081  1.00  0.00
ATOM   2428  O   WAT   296      10.680  33.572   7.031  1.00  0.00
ATOM   2429  H1  WAT   296      10.899  33.892   6.134  1.00  0.00
ATOM   2430  H2  WAT   296      11.545  33.208   7.308  1.00  0.00
ATOM   2431  O   WAT   297      17.321 -14.277  32.699  1.00  0.00
ATOM   2432  H1  WAT   297      16.451 -14.661  32.938  1.00  0.00
ATOM   2433  H2  WAT   297      17.426 -13.624  33.423  1.00  0.00
ATOM   2434  O   WAT   298      39.251  40.209  20.056  1.00  0.00
ATOM   2435  H1  WAT   298      39.912  40.511  19.389  1.00  0.00
ATOM   2436  H2  WAT   298      39.657  39.358  20.315  1.00  0.00
ATOM   2437  O   WAT   299      19.014   3.101  -1.899  1.00  0.00
ATOM   2438  H1  WAT   299      18.103   3.260  -2.187  1.00  0.00
ATOM   2439  H2  WAT   299      19.205   2.257  -2.368  1.00  0.00
ATOM   2440  O   WAT   300      36.514 -12.862  33.349  1.00  0.00
ATOM   2441  H1  WAT   300      36.569 -12.068  33.934  1.00  0.00
ATOM   2442  H2  WAT   300      36.824 -13.553  33.957  1.00  0.00
ATOM   2443  O   WAT   301      26.373  23.376 -11.440  1.00  0.00
ATOM   2444  H1  WAT   301      26.284  22.436 -11.118  1.00  0.00
ATOM   2445  H2  WAT   301      25.472  23.688 -11.210  1.00  0.00
ATOM   2446  O   WAT   302      25.662   4.410  28.283  1.00  0.00
ATOM   2447  H1  WAT   302      26.184   4.988  28.864  1.00  0.00
ATOM   2448  H2  WAT   302      26.194   4.379  27.478  1.00  0.00
ATOM   2449  O   WAT   303       3.212  26.190   3.627  1.00  0.00
ATOM   2450  H1  WAT   303       3.415  26.984   4.194  1.00  0.00
ATOM   2451  H2  WAT   303       4.039  26.195   3.088  1.00  0.00
ATOM   2452  O   WAT   304      11.125  23.952   7.649  1.00  0.00
ATOM   2453  H1  WAT   304      11.898  24.453   7.956  1.00  0.00
ATOM   2454  H2  WAT   304      10.401  24.435   8.124  1.00  0.00
ATOM   2455  O   WAT   305      22.261   8.458   9.366  1.00  0.00
ATOM   2456  H1  WAT   305      22.753   7.634   9.576  1.00  0.00
ATOM   2457  H2  WAT   305      22.866   9.109   9.808  1.00  0.00
ATOM   2458  O   WAT   306      25.733 -21.138  30.164  1.00  0.00
ATOM   2459  H1  WAT   306      25.590 -21.691  30.976  1.00  0.00
ATOM   2460  H2  WAT   306      25.352 -21.769  29.498  1.00  0.00
ATOM   2461  O   WAT   307      19.415  23.449  25.137  1.00  0.00
ATOM   2462  H1  WAT   307      18.703  23.379  25.818  1.00  0.00
ATOM   2463  H2  WAT   307      19.787  24.321  25.385  1.00  0.00
ATOM   2464  O   WAT   308      20.600  -3.048   2.390  1.00  0.00
ATOM   2465  H1  WAT   308      21.422  -2.500   2.417  1.00  0.00
ATOM   2466  H2  WAT   308      21.001  -3.919   2.633  1.00  0.00
ATOM   2467  O   WAT   309     -28.017   9.866   7.890  1.00  0.00
ATOM   2468  H1  WAT   309     -28.601   9.068   7.991  1.00  0.00
ATOM   2469  H2  WAT   309     -27.820   9.785   6.929  1.00  0.00
ATOM   2470  O   WAT   310      35.232  24.570 -21.661  1.00  0.00
ATOM   2471  H1  WAT   310      34.945  24.188 -20.793  1.00  0.00
ATOM   2472  H2  WAT   310      34.420  25.095 -21.871  1.00  0.00
ATOM   2473  O   WAT   311      22.794  17.828  37.311  1.00  0.00
ATOM   2474  H1  WAT   311      22.885  18.542  37.978  1.00  0.00
ATOM   2475  H2  WAT   311      21.833  17.621  37.425  1.00  0.00
ATOM   2476  O   WAT   312     -22.285  14.920  30.772  1.00  0.00
ATOM   2477  H1  WAT   312     -22.575  15.081  29.836  1.00  0.00
ATOM   2478  H2  WAT   312     -21.331  14.744  30.595  1.00  0.00
ATOM   2479  O   WAT   313      18.425 -20.591   2.552  1.00  0.00
ATOM   2480  H1  WAT   313      19.415 -20.598   2.580  1.00  0.00
ATOM   2481  H2  WAT   313      18.286 -20.636   1.588  1.00  0.00
ATOM   2482  O   WAT   314      14.931  34.849  37.909  1.00  0.00
ATOM   2483  H1  WAT   314      14.690  35.375  38.705  1.00  0.00
ATOM   2484  H2  WAT   314      15.543  35.470  37.470  1.00  0.00
ATOM   2485  O   WAT   315      37.407  -0.810  25.212  1.00  0.00
ATOM   2486  H1  WAT   315      37.941  -0.831  24.372  1.00  0.00
ATOM   2487  H2  WAT   315      38.004  -0.204  25.729  1.00  0.00
ATOM   2488  O   WAT   316     -27.479  19.627  -0.163  1.00  0.00
ATOM   2489  H1  WAT   316     -27.010  19.275   0.621  1.00  0.00
ATOM   2490  H2  WAT   316     -27.905  20.415   0.213  1.00  0.00
ATOM   2491  O   WAT   317      34.442  39.049  10.194  1.00  0.00
ATOM   2492  H1  WAT   317      34.975  38.238  10.006  1.00  0.00
ATOM   2493  H2  WAT   317      34.169  38.832  11.120  1.00  0.00
ATOM   2494  O   WAT   318      20.856  23.067  -1.345  1.00  0.00
ATOM   2495  H1  WAT   318      20.612  22.350  -0.724  1.00  0.00
ATOM   2496  H2  WAT   318      19.953  23.381  -1.591  1.00  0.00
ATOM   2497  O   WAT   319      18.813  24.436   2.757  1.00  0.00
ATOM   2498  H1  WAT   319      19.356  23.770   3.253  1.00  0.00
ATOM   2499  H2  WAT   319      19.544  24.900   2.283  1.00  0.00
ATOM   2500  O   WAT   320     -18.266  31.229  13.891  1.00  0.00
ATOM   2501  H1  WAT   320     -18.166  30.435  13.331  1.00  0.00
ATOM   2502  H2  WAT   320     -18.301  30.815  14.782  1.00  0.00
ATOM   2503  O   WAT   321      27.267  28.802   0.940  1.00  0.00
ATOM   2504  H1  WAT   321      28.229  29.007   0.872  1.00  0.00
ATOM   2505  H2  WAT   321      26.904  29.688   0.684  1.00  0.00
ATOM   2506  O   WAT   322      29.409  26.973  10.356  1.00  0.00
ATOM   2507  H1  WAT   322      28.587  26.485  10.090  1.00  0.00
ATOM   2508  H2  WAT   322      29.944  26.758   9.532  1.00  0.00
ATOM   2509  O   WAT   323      30.755  17.657  13.397  1.00  0.00
ATOM   2510  H1  WAT   323      30.598  17.942  14.318  1.00  0.00
ATOM   2511  H2  WAT   323      31.712  17.407  13.458  1.00  0.00
ATOM   2512  O   WAT   324      33.405  11.060   6.793  1.00  0.00
ATOM   2513  H1  WAT   324      32.429  11.101   6.912  1.00  0.00
ATOM   2514  H2  WAT   324      33.590  12.009   6.625  1.00  0.00
ATOM   2515  O   WAT   325     -19.650 -15.501  24.126  1.00  0.00
ATOM   2516  H1  WAT   325     -20.177 -15.931  23.394  1.00  0.00
ATOM   2517  H2  WAT   325     -20.334 -14.854  24.426  1.00  0.00
ATOM   2518  O   WAT   326      24.953  29.386  -2.627  1.00  0.00
ATOM   2519  H1  WAT   326      25.395  28.594  -2.241  1.00  0.00
ATOM   2520  H2  WAT   326      24.104  28.980  -2.901  1.00  0.00
ATOM   2521  O   WAT   327      19.974  14.676  17.533  1.00  0.00
ATOM   2522  H1  WAT   327      19.196  15.117  17.118  1.00  0.00
ATOM   2523  H2  WAT   327      19.563  14.420  18.396  1.00  0.00
ATOM   2524  O   WAT   328      30.092  11.436  16.926  1.00  0.00
ATOM   2525  H1  WAT   328      30.312  10.573  17.374  1.00  0.00
ATOM   2526  H2  WAT   328      29.164  11.257  16.686  1.00  0.00
ATOM   2527  O   WAT   329     -27.718 -10.072  13.190  1.00  0.00
ATOM   2528  H1  WAT   329     -28.005 -10.951  12.868  1.00  0.00
ATOM   2529  H2  WAT   329     -28.460  -9.841  13.782  1.00  0.00
ATOM   2530  O   WAT   330      14.683  19.076  19.111  1.00  0.00
ATOM   2531  H1  WAT   330      14.210  19.325  19.915  1.00  0.00
ATOM   2532  H2  WAT   330      14.348  19.722  18.462  1.00  0.00
ATOM   2533  O   WAT   331      17.751  16.576  22.118  1.00  0.00
ATOM   2534  H1  WAT   331      18.721  16.561  21.974  1.00  0.00
ATOM   2535  H2  WAT   331      17.475  17.241  21.471  1.00  0.00
ATOM   2536  O   WAT   332      12.085 -19.116  36.633  1.00  0.00
ATOM   2537  H1  WAT   332      13.019 -19.356  36.821  1.00  0.00
ATOM   2538  H2  WAT   332      11.619 -19.879  37.015  1.00  0.00
ATOM   2539  O   WAT   333      12.662  20.186   7.186  1.00  0.00
ATOM   2540  H1  WAT   333      12.736  20.463   6.253  1.00  0.00
ATOM   2541  H2  WAT   333      13.452  20.648   7.563  1.00  0.00
ATOM   2542  O   WAT   334      31.916  22.874 -13.626  1.00  0.00
ATOM   2543  H1  WAT   334      31.446  23.688 -13.946  1.00  0.00
ATOM   2544  H2  WAT   334      32.007  23.112 -12.679  1.00  0.00
ATOM   2545  O   WAT   335      35.408 -12.659   7.034  1.00  0.00
ATOM   2546  H1  WAT   335      34.964 -11.794   7.191  1.00  0.00
ATOM   2547  H2  WAT   335      36.274 -12.341   6.681  1.00  0.00
ATOM   2548  O   WAT   336      12.751  23.203 -12.411  1.00  0.00
ATOM   2549  H1  WAT   336      12.030  23.667 -11.931  1.00  0.00
ATOM   2550  H2  WAT   336      13.518  23.544 -11.857  1.00  0.00
ATOM   2551  O   WAT   337     -12.772  38.755  -2.493  1.00  0.00
ATOM   2552  H1  WAT   337     -12.833  38.219  -3.323  1.00  0.00
ATOM   2553  H2  WAT   337     -11.858  38.495  -2.218  1.00  0.00
ATOM   2554  O   WAT   338      35.006  26.135   9.688  1.00  0.00
ATOM   2555  H1  WAT   338      35.193  26.926  10.246  1.00  0.00
ATOM   2556  H2  WAT   338      35.065  25.428  10.353  1.00  0.00
ATOM   2557  O   WAT   339      23.760  -9.942   2.524  1.00  0.00
ATOM   2558  H1  WAT   339      24.627 -10.376   2.397  1.00  0.00
ATOM   2559  H2  WAT   339      23.173 -10.718   2.583  1.00  0.00
ATOM   2560  O   WAT   340      30.392  25.777  -6.394  1.00  0.00
ATOM   2561  H1  WAT   340      29.839  25.011  -6.600  1.00  0.00
ATOM   2562  H2  WAT   340      30.239  26.344  -7.179  1.00  0.00
ATOM   2563  O   WAT   341      14.267 -17.681  -1.597  1.00  0.00
ATOM   2564  H1  WAT   341      14.231 -18.491  -1.032  1.00  0.00
ATOM   2565  H2  WAT   341      14.276 -18.102  -2.483  1.00  0.00
ATOM   2566  O   WAT   342      25.833  32.838   9.002  1.00  0.00
ATOM   2567  H1  WAT   342      25.701  31.877   9.105  1.00  0.00
ATOM   2568  H2  WAT   342      26.714  32.953   9.398  1.00  0.00
ATOM   2569  O   WAT   343      40.777  16.754  25.199  1.00  0.00
ATOM   2570  H1  WAT   343      40.734  16.256  26.042  1.00  0.00
ATOM   2571  H2  WAT   343      39.918  17.216  25.213  1.00  0.00
ATOM   2572  O   WAT   344      -2.261  -2.451 -15.646  1.00  0.00
ATOM   2573  H1  WAT   344      -2.026  -2.177 -14.710  1.00  0.00
ATOM   2574  H2  WAT   344      -1.785  -3.300 -15.671  1.00  0.00
ATOM   2575  O   WAT   345     -26.332 -19.019  -3.758  1.00  0.00
ATOM   2576  H1  WAT   345     -26.874 -19.673  -4.236  1.00  0.00
ATOM   2577  H2  WAT   345     -26.894 -18.216  -3.882  1.00  0.00
ATOM   2578  O   WAT   346      29.598  15.982  -0.032  1.00  0.00
ATOM   2579  H1  WAT   346      30.404  15.471   0.148  1.00  0.00
ATOM   2580  H2  WAT   346      29.884  16.506  -0.813  1.00  0.00
ATOM   2581  O   WAT   347      14.266  27.369   4.460  1.00  0.00
ATOM   2582  H1  WAT   347      14.250  26.422   4.715  1.00  0.00
ATOM   2583  H2  WAT   347      15.086  27.400   3.936  1.00  0.00
ATOM   2584  O   WAT   348     -18.584 -12.560 -16.497  1.00  0.00
ATOM   2585  H1  WAT   348     -19.199 -12.392 -17.233  1.00  0.00
ATOM   2586  H2  WAT   348     -17.769 -12.123 -16.858  1.00  0.00
ATOM   2587  O   WAT   349      -6.399  26.585 -24.239  1.00  0.00
ATOM   2588  H1  WAT   349      -6.753  25.709 -24.518  1.00  0.00
ATOM   2589  H2  WAT   349      -6.352  26.450 -23.273  1.00  0.00
ATOM   2590  O   WAT   350      25.489  37.636  32.093  1.00  0.00
ATOM   2591  H1  WAT   350      25.369  37.948  33.025  1.00  0.00
ATOM   2592  H2  WAT   350      24.894  36.849  32.122  1.00  0.00
ATOM   2593  O   WAT   351     -25.284  35.024  -6.729  1.00  0.00
ATOM   2594  H1  WAT   351     -24.335  35.059  -6.494  1.00  0.00
ATOM   2595  H2  WAT   351     -25.207  35.018  -7.709  1.00  0.00
ATOM   2596  O   WAT   352      37.874  33.992  32.205  1.00  0.00
ATOM   2597  H1  WAT   352      37.796  33.129  31.755  1.00  0.00
ATOM   2598  H2  WAT   352      38.475  33.732  32.948  1.00  0.00
ATOM   2599  O   WAT   353      15.567 -18.960  24.685  1.00  0.00
ATOM   2600  H1  WAT   353      16.332 -18.559  25.139  1.00  0.00
ATOM   2601  H2  WAT   353      16.027 -19.690  24.208  1.00  0.00
ATOM   2602  O   WAT   354     -19.352  22.513   5.233  1.00  0.00
ATOM   2603  H1  WAT   354     -20.237  22.338   4.803  1.00  0.00
ATOM   2604  H2  WAT   354     -18.970  23.100   4.553  1.00  0.00
ATOM   2605  O   WAT   355       6.324   8.218  41.942  1.00  0.00
ATOM   2606  H1  WAT   355       5.394   8.162  42.250  1.00  0.00
ATOM   2607  H2  WAT   355       6.202   8.625  41.065  1.00  0.00
ATOM   2608  O   WAT   356      19.490 -18.060  36.077  1.00  0.00
ATOM   2609  H1  WAT   356      19.446 -17.680  35.170  1.00  0.00
ATOM   2610  H2  WAT   356      20.076 -17.391  36.501  1.00  0.00
ATOM   2611  O   WAT   357      19.733  26.508  -5.950  1.00  0.00
ATOM   2612  H1  WAT   357      19.053  25.845  -5.708  1.00  0.00
ATOM   2613  H2  WAT   357      19.151  27.178  -6.387  1.00  0.00
ATOM   2614  O   WAT   358      31.842  13.238 -10.282  1.00  0.00
ATOM   2615  H1  WAT   358      32.039  12.369 -10.699  1.00  0.00
ATOM   2616  H2  WAT   358      30.884  13.133 -10.107  1.00  0.00
ATOM   2617  O   WAT   359      14.089   1.442 -21.982  1.00  0.00
ATOM   2618  H1  WAT   359      13.237   1.793 -22.296  1.00  0.00
ATOM   2619  H2  WAT   359      14.037   1.661 -21.028  1.00  0.00
ATOM   2620  O   WAT   360       1.965  29.360  -9.488  1.00  0.00
ATOM   2621  H1  WAT   360       1.057  29.207  -9.851  1.00  0.00
ATOM   2622  H2  WAT   360       2.154  28.458  -9.152  1.00  0.00
ATOM   2623  O   WAT   361      -4.485  35.097  40.589  1.00  0.00
ATOM   2624  H1  WAT   361      -5.373  35.409  40.881  1.00  0.00
ATOM   2625  H2  WAT   361      -3.921  35.527  41.264  1.00  0.00
ATOM   2626  O   WAT   362       5.634  35.358 -18.027  1.00  0.00
ATOM   2627  H1  WAT   362       5.266  36.164 -17.594  1.00  0.00
ATOM   2628  H2  WAT   362       5.625  34.753 -17.240  1.00  0.00
ATOM   2629  O   WAT   363      24.128  22.914  28.345  1.00  0.00
ATOM   2630  H1  WAT   363      24.353  23.810  28.005  1.00  0.00
ATOM   2631  H2  WAT   363      23.623  22.578  27.566  1.00  0.00
ATOM   2632  O   WAT   364      27.441 -11.771  -9.806  1.00  0.00
ATOM   2633  H1  WAT   364      28.101 -11.165 -10.210  1.00  0.00
ATOM   2634  H2  WAT   364      26.613 -11.270 -10.017  1.00  0.00
ATOM   2635  O   WAT   365      -5.707  34.763   8.239  1.00  0.00
ATOM   2636  H1  WAT   365      -5.427  33.953   8.714  1.00  0.00
ATOM   2637  H2  WAT   365      -6.338  34.383   7.597  1.00  0.00
ATOM   2638  O   WAT   366      21.293   5.552 -10.731  1.00  0.00
ATOM   2639  H1  WAT   366      21.821   5.396 -11.570  1.00  0.00
ATOM   2640  H2  WAT   366      20.902   4.652 -10.650  1.00  0.00
ATOM   2641  O   WAT   367      35.081   5.198  -9.334  1.00  0.00
ATOM   2642  H1  WAT   367      34.140   5.274  -9.047  1.00  0.00
ATOM   2643  H2  WAT   367      35.527   5.576  -8.551  1.00  0.00
ATOM   2644  O   WAT   368      10.927  36.293  -8.710  1.00  0.00
ATOM   2645  H1  WAT   368      10.200  36.904  -8.428  1.00  0.00
ATOM   2646  H2  WAT   368      11.369  36.861  -9.371  1.00  0.00
ATOM   2647  O   WAT   369     -19.082 -11.419 -25.575  1.00  0.00
ATOM   2648  H1  WAT   369     -18.433 -10.679 -25.644  1.00  0.00
ATOM   2649  H2  WAT   369     -19.029 -11.592 -24.612  1.00  0.00
ATOM   2650  O   WAT   370      20.777  29.429  14.429  1.00  0.00
ATOM   2651  H1  WAT   370      20.583  29.197  15.362  1.00  0.00
ATOM   2652  H2  WAT   370      20.262  30.263  14.348  1.00  0.00
ATOM   2653  O   WAT   371       7.263  35.870  29.808  1.00  0.00
ATOM   2654  H1  WAT   371       7.015  35.184  29.152  1.00  0.00
ATOM   2655  H2  WAT   371       7.798  35.329  30.425  1.00  0.00
ATOM   2656  O   WAT   372      -5.154  33.142 -22.205  1.00  0.00
ATOM   2657  H1  WAT   372      -5.117  33.993 -21.696  1.00  0.00
ATOM   2658  H2  WAT   372      -6.085  32.889 -21.997  1.00  0.00
ATOM   2659  O   WAT   373      33.308  25.856 -22.871  1.00  0.00
ATOM   2660  H1  WAT   373      32.361  25.919 -22.621  1.00  0.00
ATOM   2661  H2  WAT   373      33.355  26.577 -23.532  1.00  0.00
ATOM   2662  O   WAT   374      28.796  26.857 -16.408  1.00  0.00
ATOM   2663  H1  WAT   374      29.432  27.182 -17.097  1.00  0.00
ATOM   2664  H2  WAT   374      29.078  27.466 -15.677  1.00  0.00
ATOM   2665  O   WAT   375      10.931  10.697 -13.080  1.00  0.00
ATOM   2666  H1  WAT   375      11.425  11.039 -13.838  1.00  0.00
ATOM   2667  H2  WAT   375      10.677  11.512 -12.615  1.00  0.00
ATOM   2668  O   WAT   376      24.642 -14.466 -18.313  1.00  0.00
ATOM   2669  H1  WAT   376      24.094 -15.240 -18.582  1.00  0.00
ATOM   2670  H2  WAT   376      24.485 -13.877 -19.085  1.00  0.00
ATOM   2671  O   WAT   377      27.868   9.631  30.343  1.00  0.00
ATOM   2672  H1  WAT   377      28.739  10.079  30.178  1.00  0.00
ATOM   2673  H2  WAT   377      27.664   9.341  29.429  1.00  0.00
ATOM   2674  O   WAT   378      28.784  30.022  -3.699  1.00  0.00
ATOM   2675  H1  WAT   378      28.386  29.279  -4.206  1.00  0.00
ATOM   2676  H2  WAT   378      29.148  29.518  -2.938  1.00  0.00
ATOM   2677  O   WAT   379      18.233  -4.328 -22.335  1.00  0.00
ATOM   2678  H1  WAT   379      18.830  -3.785 -22.908  1.00  0.00
ATOM   2679  H2  WAT   379      17.413  -3.804 -22.417  1.00  0.00
ATOM   2680  O   WAT   380      26.890  40.687  38.573  1.00  0.00
ATOM   2681  H1  WAT   380      27.275  39.876  38.176  1.00  0.00
ATOM   2682  H2  WAT   380      25.999  40.665  38.160  1.00  0.00
ATOM   2683  O   WAT   381      18.649  14.378 -13.133  1.00  0.00
ATOM   2684  H1  WAT   381      18.114  14.476 -13.948  1.00  0.00
ATOM   2685  H2  WAT   381      18.660  13.387 -13.067  1.00  0.00
ATOM   2686  O   WAT   382       2.763  -9.679 -19.354  1.00  0.00
ATOM   2687  H1  WAT   382       3.108  -8.959 -18.787  1.00  0.00
ATOM   2688  H2  WAT   382       1.901  -9.846 -18.894  1.00  0.00
ATOM   2689  O   WAT   383      29.597  15.661 -13.170  1.00  0.00
ATOM   2690  H1  WAT   383      30.431  15.785 -13.671  1.00  0.00
ATOM   2691  H2  WAT   383      29.377  14.744 -13.435  1.00  0.00
ATOM   2692  O   WAT   384     -25.748   7.353  39.909  1.00  0.00
ATOM   2693  H1  WAT   384     -25.503   7.273  38.967  1.00  0.00
ATOM   2694  H2  WAT   384     -24.870   7.252  40.327  1.00  0.00
ATOM   2695  O   WAT   385      30.017  39.085 -17.941  1.00  0.00
ATOM   2696  H1  WAT   385      29.407  39.394 -17.235  1.00  0.00
ATOM   2697  H2  WAT   385      30.106  39.937 -18.446  1.00  0.00
ATOM   2698  O   WAT   386      32.759  38.528 -23.955  1.00  0.00
ATOM   2699  H1  WAT   386      32.155  38.756 -23.209  1.00  0.00
ATOM   2700  H2  WAT   386      32.078  38.137 -24.560  1.00  0.00
ATOM   2701  O   WAT   387      16.998  28.068 -18.262  1.00  0.00
ATOM   2702  H1  WAT   387      16.827  28.606 -19.078  1.00  0.00
ATOM   2703  H2  WAT   387      16.498  28.619 -17.617  1.00  0.00
ATOM   2704  O   WAT   388      22.553  -9.715 -10.268  1.00  0.00
ATOM   2705  H1  WAT   388      23.124  -9.043 -10.723  1.00  0.00
ATOM   2706  H2  WAT   388      21.882  -9.077  -9.890  1.00  0.00
ATOM   2707  O   WAT   389      34.375  36.038  24.082  1.00  0.00
ATOM   2708  H1  WAT   389      35.039  35.983  24.826  1.00  0.00
ATOM   2709  H2  WAT   389      34.262  37.004  24.038  1.00  0.00
ATOM   2710  O   WAT   390      39.982  37.273  37.489  1.00  0.00
ATOM   2711  H1  WAT   390      39.270  37.366  36.804  1.00  0.00
ATOM   2712  H2  WAT   390      39.470  36.830  38.196  1.00  0.00
ATOM   2713  O   WAT   391      18.717 -13.681  -5.119  1.00  0.00
ATOM   2714  H1  WAT   391      18.710 -14.650  -5.105  1.00  0.00
ATOM   2715  H2  WAT   391      18.093 -13.468  -4.401  1.00  0.00
ATOM   2716  O   WAT   392      10.226  23.282  -6.845  1.00  0.00
ATOM   2717  H1  WAT   392      10.747  22.546  -7.231  1.00  0.00
ATOM   2718  H2  WAT   392      10.814  24.040  -7.078  1.00  0.00
ATOM   2719  O   WAT   393      10.040  16.341  21.774  1.00  0.00
ATOM   2720  H1  WAT   393       9.717  15.424  21.666  1.00  0.00
ATOM   2721  H2  WAT   393       9.594  16.781  21.026  1.00  0.00
ATOM   2722  O   WAT   394      20.601   9.567 -17.228  1.00  0.00
ATOM   2723  H1  WAT   394      19.939   9.173 -17.847  1.00  0.00
ATOM   2724  H2  WAT   394      21.163   8.772 -17.083  1.00  0.00
ATOM   2725  O   WAT   395      18.192   8.284   6.544  1.00  0.00
ATOM   2726  H1  WAT   395      17.705   9.149   6.699  1.00  0.00
ATOM   2727  H2  WAT   395      19.107   8.625   6.676  1.00  0.00
ATOM   2728  O   WAT   396      14.661  23.100 -20.842  1.00  0.00
ATOM   2729  H1  WAT   396      14.631  22.441 -21.554  1.00  0.00
ATOM   2730  H2  WAT   396      14.062  23.784 -21.179  1.00  0.00
ATOM   2731  O   WAT   397      23.783  12.284  -0.678  1.00  0.00
ATOM   2732  H1  WAT   397      24.312  11.578  -1.089  1.00  0.00
ATOM   2733  H2  WAT   397      23.400  11.776   0.089  1.00  0.00
ATOM   2734  O   WAT   398      14.028  34.038 -16.697  1.00  0.00
ATOM   2735  H1  WAT   398      14.054  34.995 -16.516  1.00  0.00
ATOM   2736  H2  WAT   398      13.078  33.870 -16.785  1.00  0.00
ATOM   2737  O   WAT   399      21.247  34.963  29.399  1.00  0.00
ATOM   2738  H1  WAT   399      21.971  35.601  29.581  1.00  0.00
ATOM   2739  H2  WAT   399      20.674  35.495  28.827  1.00  0.00
ATOM   2740  O   WAT   400      15.097  20.379  -5.064  1.00  0.00
ATOM   2741  H1  WAT   400      14.648  21.240  -4.967  1.00  0.00
ATOM   2742  H2  WAT   400      15.177  20.125  -4.112  1.00  0.00
ATOM   2743  O   WAT   401      29.079   4.561  21.848  1.00  0.00
ATOM   2744  H1  WAT   401      28.586   3.792  21.484  1.00  0.00
ATOM   2745  H2  WAT   401      28.558   5.297  21.492  1.00  0.00
ATOM   2746  O   WAT   402      15.657 -17.228 -16.333  1.00  0.00
ATOM   2747  H1  WAT   402      16.459 -16.719 -16.029  1.00  0.00
ATOM   2748  H2  WAT   402      16.104 -17.820 -16.989  1.00  0.00
ATOM   2749  O   WAT   403      25.780  21.432  35.700  1.00  0.00
ATOM   2750  H1  WAT   403      24.864  21.075  35.710  1.00  0.00
ATOM   2751  H2  WAT   403      26.287  20.589  35.699  1.00  0.00
ATOM   2752  O   WAT   404      17.534 -11.479  38.846  1.00  0.00
ATOM   2753  H1  WAT   404      18.373 -11.999  38.784  1.00  0.00
ATOM   2754  H2  WAT   404      17.711 -10.808  38.151  1.00  0.00
ATOM   2755  O   WAT   405      24.183  17.841 -26.455  1.00  0.00
ATOM   2756  H1  WAT   405      24.621  18.686 -26.220  1.00  0.00
ATOM   2757  H2  WAT   405      23.263  18.179 -26.584  1.00  0.00
ATOM   2758  O   WAT   406      21.037  24.053  35.813  1.00  0.00
ATOM   2759  H1  WAT   406      21.555  24.697  36.327  1.00  0.00
ATOM   2760  H2  WAT   406      20.206  24.598  35.675  1.00  0.00
ATOM   2761  O   WAT   407      23.679   9.747  11.145  1.00  0.00
ATOM   2762  H1  WAT   407      23.754   9.204  11.969  1.00  0.00
ATOM   2763  H2  WAT   407      23.275  10.562  11.536  1.00  0.00
ATOM   2764  O   WAT   408      11.754  30.493 -19.083  1.00  0.00
ATOM   2765  H1  WAT   408      11.610  29.885 -19.829  1.00  0.00
ATOM   2766  H2  WAT   408      11.282  30.029 -18.365  1.00  0.00
ATOM   2767  O   WAT   409       1.249  -0.301  37.650  1.00  0.00
ATOM   2768  H1  WAT   409       0.846  -0.804  36.926  1.00  0.00
ATOM   2769  H2  WAT   409       1.954  -0.889  37.948  1.00  0.00
ATOM   2770  O   WAT   410      37.412   6.748   5.377  1.00  0.00
ATOM   2771  H1  WAT   410      37.598   7.303   4.604  1.00  0.00
ATOM   2772  H2  WAT   410      37.571   7.379   6.110  1.00  0.00
ATOM   2773  O   WAT   411      34.558  24.154 -13.657  1.00  0.00
ATOM   2774  H1  WAT   411      33.687  23.750 -13.524  1.00  0.00
ATOM   2775  H2  WAT   411      35.124  23.341 -13.717  1.00  0.00
ATOM   2776  O   WAT   412       6.974  35.129  36.298  1.00  0.00
ATOM   2777  H1  WAT   412       7.127  35.702  37.074  1.00  0.00
ATOM   2778  H2  WAT   412       6.011  34.972  36.379  1.00  0.00
ATOM   2779  O   WAT   413      21.765  34.914 -18.242  1.00  0.00
ATOM   2780  H1  WAT   413      21.360  34.062 -18.495  1.00  0.00
ATOM   2781  H2  WAT   413      21.396  35.010 -17.334  1.00  0.00
ATOM   2782  O   WAT   414     -18.537  17.989 -18.444  1.00  0.00
ATOM   2783  H1  WAT   414     -19.097  17.353 -18.939  1.00  0.00
ATOM   2784  H2  WAT   414     -18.867  17.848 -17.533  1.00  0.00
ATOM   2785  O   WAT   415     -21.026   7.190 -23.955  1.00  0.00
ATOM   2786  H1  WAT   415     -21.146   7.637 -23.084  1.00  0.00
ATOM   2787  H2  WAT   415     -21.701   6.482 -23.867  1.00  0.00
ATOM   2788  O   WAT   416      23.157  21.857 -12.902  1.00  0.00
ATOM   2789  H1  WAT   416      23.360  22.559 -12.254  1.00  0.00
ATOM   2790  H2  WAT   416      24.005  21.772 -13.373  1.00  0.00
ATOM   2791  O   WAT   417       2.115  13.728  30.614  1.00  0.00
ATOM   2792  H1  WAT   417       1.718  14.021  29.775  1.00  0.00
ATOM   2793  H2  WAT   417       2.908  13.255  30.290  1.00  0.00
ATOM   2794  O   WAT   418      -8.468  37.678   7.964  1.00  0.00
ATOM   2795  H1  WAT   418      -8.590  36.965   7.301  1.00  0.00
ATOM   2796  H2  WAT   418      -7.498  37.635   8.096  1.00  0.00
ATOM   2797  O   WAT   419      17.136  10.679 -16.576  1.00  0.00
ATOM   2798  H1  WAT   419      16.449  11.142 -17.091  1.00  0.00
ATOM   2799  H2  WAT   419      17.889  11.294 -16.675  1.00  0.00
ATOM   2800  O   WAT   420      13.227  39.052 -23.497  1.00  0.00
ATOM   2801  H1  WAT   420      13.791  39.154 -24.303  1.00  0.00
ATOM   2802  H2  WAT   420      13.893  39.280 -22.808  1.00  0.00
ATOM   2803  O   WAT   421      34.641 -15.212   2.955  1.00  0.00
ATOM   2804  H1  WAT   421      34.292 -14.620   3.649  1.00  0.00
ATOM   2805  H2  WAT   421      35.385 -14.656   2.617  1.00  0.00
ATOM   2806  O   WAT   422      32.821  30.467 -14.548  1.00  0.00
ATOM   2807  H1  WAT   422      33.007  30.159 -15.481  1.00  0.00
ATOM   2808  H2  WAT   422      31.841  30.543 -14.635  1.00  0.00
ATOM   2809  O   WAT   423      21.665  36.722 -15.383  1.00  0.00
ATOM   2810  H1  WAT   423      21.346  36.993 -14.486  1.00  0.00
ATOM   2811  H2  WAT   423      21.127  35.905 -15.496  1.00  0.00
ATOM   2812  O   WAT   424      25.802 -13.333   6.103  1.00  0.00
ATOM   2813  H1  WAT   424      24.996 -13.349   6.644  1.00  0.00
ATOM   2814  H2  WAT   424      25.507 -13.729   5.273  1.00  0.00
ATOM   2815  O   WAT   425      37.932 -19.668 -26.439  1.00  0.00
ATOM   2816  H1  WAT   425      37.166 -19.917 -25.883  1.00  0.00
ATOM   2817  H2  WAT   425      38.671 -19.810 -25.810  1.00  0.00
ATOM   2818  O   WAT   426       8.642  36.867 -22.002  1.00  0.00
ATOM   2819  H1  WAT   426       9.135  37.723 -22.054  1.00  0.00
ATOM   2820  H2  WAT   426       8.013  37.094 -21.291  1.00  0.00
ATOM   2821  O   WAT   427     -25.945 -19.088 -15.384  1.00  0.00
ATOM   2822  H1  WAT   427     -26.630 -18.398 -15.414  1.00  0.00
ATOM   2823  H2  WAT   427     -25.137 -18.529 -15.319  1.00  0.00
ATOM   2824  O   WAT   428      29.733  29.336   6.095  1.00  0.00
ATOM   2825  H1  WAT   428      29.646  29.569   7.038  1.00  0.00
ATOM   2826  H2  WAT   428      29.555  28.374   6.128  1.00  0.00
ATOM   2827  O   WAT   429      41.156 -19.177  32.937  1.00  0.00
ATOM   2828  H1  WAT   429      41.454 -18.697  32.137  1.00  0.00
ATOM   2829  H2  WAT   429      40.250 -18.816  33.029  1.00  0.00
ATOM   2830  O   WAT   430      26.091 -16.002   5.162  1.00  0.00
ATOM   2831  H1  WAT   430      26.962 -15.927   4.723  1.00  0.00
ATOM   2832  H2  WAT   430      26.341 -15.706   6.069  1.00  0.00
ATOM   2833  O   WAT   431       2.075  34.942 -12.277  1.00  0.00
ATOM   2834  H1  WAT   431       2.770  34.782 -11.589  1.00  0.00
ATOM   2835  H2  WAT   431       1.328  35.172 -11.673  1.00  0.00
ATOM   2836  O   WAT   432      32.140  -0.115   6.879  1.00  0.00
ATOM   2837  H1  WAT   432      31.745  -0.877   7.356  1.00  0.00
ATOM   2838  H2  WAT   432      33.019  -0.090   7.324  1.00  0.00
ATOM   2839  O   WAT   433      22.208  -5.032 -25.007  1.00  0.00
ATOM   2840  H1  WAT   433      22.083  -4.096 -24.750  1.00  0.00
ATOM   2841  H2  WAT   433      22.308  -5.445 -24.132  1.00  0.00
ATOM   2842  O   WAT   434      37.041  25.083  21.335  1.00  0.00
ATOM   2843  H1  WAT   434      37.476  24.278  21.676  1.00  0.00
ATOM   2844  H2  WAT   434      37.276  25.044  20.393  1.00  0.00
ATOM   2845  O   WAT   435      24.787  13.383   9.250  1.00  0.00
ATOM   2846  H1  WAT   435      24.551  13.309   8.299  1.00  0.00
ATOM   2847  H2  WAT   435      25.086  12.456   9.409  1.00  0.00
ATOM   2848  O   WAT   436       6.418  22.473   6.023  1.00  0.00
ATOM   2849  H1  WAT   436       5.517  22.300   5.658  1.00  0.00
ATOM   2850  H2  WAT   436       6.836  22.889   5.237  1.00  0.00
ATOM   2851  O   WAT   437      33.308   7.650   9.661  1.00  0.00
ATOM   2852  H1  WAT   437      34.135   8.194   9.593  1.00  0.00
ATOM   2853  H2  WAT   437      33.552   7.110  10.451  1.00  0.00
ATOM   2854  O   WAT   438       2.893 -19.196  38.763  1.00  0.00
ATOM   2855  H1  WAT   438       3.342 -18.501  39.322  1.00  0.00
ATOM   2856  H2  WAT   438       3.214 -19.994  39.275  1.00  0.00
ATOM   2857  O   WAT   439      33.483  19.217 -21.165  1.00  0.00
ATOM   2858  H1  WAT   439      32.717  19.279 -21.790  1.00  0.00
ATOM   2859  H2  WAT   439      34.151  19.711 -21.708  1.00  0.00
ATOM   2860  O   WAT   440      11.075 -18.469 -26.385  1.00  0.00
ATOM   2861  H1  WAT   440      10.862 -17.716 -26.980  1.00  0.00
ATOM   2862  H2  WAT   440      10.688 -19.202 -26.905  1.00  0.00
ATOM   2863  O   WAT   441      22.244  30.829 -16.264  1.00  0.00
ATOM   2864  H1  WAT   441      22.216  31.518 -16.946  1.00  0.00
ATOM   2865  H2  WAT   441      22.126  30.022 -16.806  1.00  0.00
ATOM   2866  O   WAT   442      26.715  25.192 -16.543  1.00  0.00
ATOM   2867  H1  WAT   442      27.011  24.365 -16.991  1.00  0.00
ATOM   2868  H2  WAT   442      27.604  25.625 -16.442  1.00  0.00
ATOM   2869  O   WAT   443       3.103  -8.438 -15.107  1.00  0.00
ATOM   2870  H1  WAT   443       3.300  -7.520 -14.807  1.00  0.00
ATOM   2871  H2  WAT   443       2.162  -8.351 -15.346  1.00  0.00
ATOM   2872  O   WAT   444      27.181  10.767  34.261  1.00  0.00
ATOM   2873  H1  WAT   444      26.621  11.557  34.384  1.00  0.00
ATOM   2874  H2  WAT   444      26.704  10.128  34.835  1.00  0.00
ATOM   2875  O   WAT   445      30.071  29.139   0.836  1.00  0.00
ATOM   2876  H1  WAT   445      30.614  28.848   1.612  1.00  0.00
ATOM   2877  H2  WAT   445      30.231  30.096   0.865  1.00  0.00
ATOM   2878  O   WAT   446      30.324  16.413  -7.169  1.00  0.00
ATOM   2879  H1  WAT   446      29.364  16.306  -7.356  1.00  0.00
ATOM   2880  H2  WAT   446      30.543  15.494  -6.912  1.00  0.00
ATOM   2881  O   WAT   447      16.083  31.415  -6.701  1.00  0.00
ATOM   2882  H1  WAT   447      17.072  31.389  -6.756  1.00  0.00
ATOM   2883  H2  WAT   447      15.899  32.075  -7.396  1.00  0.00
ATOM   2884  O   WAT   448      10.929  31.303  -8.812  1.00  0.00
ATOM   2885  H1  WAT   448      11.260  31.193  -9.737  1.00  0.00
ATOM   2886  H2  WAT   448      11.070  32.264  -8.704  1.00  0.00
ATOM   2887  O   WAT   449      -1.895 -16.675  26.724  1.00  0.00
ATOM   2888  H1  WAT   449      -2.602 -16.141  26.305  1.00  0.00
ATOM   2889  H2  WAT   449      -2.366 -16.955  27.543  1.00  0.00
ATOM   2890  O   WAT   450      -4.490  23.094  -5.430  1.00  0.00
ATOM   2891  H1  WAT   450      -4.269  22.239  -5.863  1.00  0.00
ATOM   2892  H2  WAT   450      -5.122  23.444  -6.108  1.00  0.00
ATOM   2893  O   WAT   451      13.270 -17.406   2.432  1.00  0.00
ATOM   2894  H1  WAT   451      13.881 -17.297   1.665  1.00  0.00
ATOM   2895  H2  WAT   451      13.899 -17.779   3.085  1.00  0.00
ATOM   2896  O   WAT   452      41.629  34.206  -5.518  1.00  0.00
ATOM   2897  H1  WAT   452      41.330  34.985  -6.031  1.00  0.00
ATOM   2898  H2  WAT   452      42.604  34.279  -5.687  1.00  0.00
ATOM   2899  O   WAT   453     -23.020   0.689  -5.115  1.00  0.00
ATOM   2900  H1  WAT   453     -22.694   0.257  -5.942  1.00  0.00
ATOM   2901  H2  WAT   453     -23.000   1.629  -5.416  1.00  0.00
ATOM   2902  O   WAT   454      10.745  -8.459 -17.383  1.00  0.00
ATOM   2903  H1  WAT   454       9.821  -8.805 -17.351  1.00  0.00
ATOM   2904  H2  WAT   454      10.994  -8.549 -16.448  1.00  0.00
ATOM   2905  O   WAT   455      40.335  14.876  -9.049  1.00  0.00
ATOM   2906  H1  WAT   455      41.281  14.877  -9.357  1.00  0.00
ATOM   2907  H2  WAT   455      40.168  13.904  -9.136  1.00  0.00
ATOM   2908  O   WAT   456      38.008  34.306   5.605  1.00  0.00
ATOM   2909  H1  WAT   456      38.936  34.264   5.889  1.00  0.00
ATOM   2910  H2  WAT   456      37.964  35.204   5.234  1.00  0.00
ATOM   2911  O   WAT   457      19.245  -7.202 -20.618  1.00  0.00
ATOM   2912  H1  WAT   457      18.805  -7.083 -21.489  1.00  0.00
ATOM   2913  H2  WAT   457      19.354  -6.262 -20.359  1.00  0.00
ATOM   2914  O   WAT   458       8.440 -13.350  -5.730  1.00  0.00
ATOM   2915  H1  WAT   458       8.360 -12.944  -4.851  1.00  0.00
ATOM   2916  H2  WAT   458       9.413 -13.319  -5.854  1.00  0.00
ATOM   2917  O   WAT   459      27.992   8.447  32.677  1.00  0.00
ATOM   2918  H1  WAT   459      27.884   8.796  31.750  1.00  0.00
ATOM   2919  H2  WAT   459      28.005   9.306  33.155  1.00  0.00
ATOM   2920  O   WAT   460      26.290   8.662  36.158  1.00  0.00
ATOM   2921  H1  WAT   460      25.639   8.040  35.761  1.00  0.00
ATOM   2922  H2  WAT   460      27.049   8.045  36.265  1.00  0.00
ATOM   2923  O   WAT   461      17.564  29.711  30.889  1.00  0.00
ATOM   2924  H1  WAT   461      17.885  29.582  29.975  1.00  0.00
ATOM   2925  H2  WAT   461      16.673  30.074  30.726  1.00  0.00
ATOM   2926  O   WAT   462     -19.453  12.308  -5.657  1.00  0.00
ATOM   2927  H1  WAT   462     -20.227  12.094  -6.234  1.00  0.00
ATOM   2928  H2  WAT   462     -19.652  11.645  -4.933  1.00  0.00
ATOM   2929  O   WAT   463      -1.452  32.244  15.679  1.00  0.00
ATOM   2930  H1  WAT   463      -2.413  31.995  15.784  1.00  0.00
ATOM   2931  H2  WAT   463      -1.081  31.369  15.466  1.00  0.00
ATOM   2932  O   WAT   464      32.065   8.849 -18.299  1.00  0.00
ATOM   2933  H1  WAT   464      33.002   8.903 -18.035  1.00  0.00
ATOM   2934  H2  WAT   464      31.657   9.451 -17.641  1.00  0.00
ATOM   2935  O   WAT   465     -28.048 -11.535  26.721  1.00  0.00
ATOM   2936  H1  WAT   465     -28.547 -12.337  26.525  1.00  0.00
ATOM   2937  H2  WAT   465     -27.304 -11.595  26.100  1.00  0.00
ATOM   2938  O   WAT   466       8.217 -11.423  41.289  1.00  0.00
ATOM   2939  H1  WAT   466       7.481 -11.761  41.836  1.00  0.00
ATOM   2940  H2  WAT   466       7.837 -11.543  40.396  1.00  0.00
ATOM   2941  O   WAT   467      41.692  30.480  29.610  1.00  0.00
ATOM   2942  H1  WAT   467      42.588  30.503  30.037  1.00  0.00
ATOM   2943  H2  WAT   467      41.887  31.001  28.810  1.00  0.00
ATOM   2944  O   WAT   468      10.000  -0.830  21.153  1.00  0.00
ATOM   2945  H1  WAT   468      10.687  -0.313  20.676  1.00  0.00
ATOM   2946  H2  WAT   468       9.572  -1.270  20.375  1.00  0.00
ATOM   2947  O   WAT   469      21.691 -17.393 -11.066  1.00  0.00
ATOM   2948  H1  WAT   469      21.397 -16.512 -10.755  1.00  0.00
ATOM   2949  H2  WAT   469      22.453 -17.110 -11.636  1.00  0.00
ATOM   2950  O   WAT   470       0.896  19.808  36.764  1.00  0.00
ATOM   2951  H1  WAT   470       1.557  20.331  36.265  1.00  0.00
ATOM   2952  H2  WAT   470       1.421  19.585  37.562  1.00  0.00
ATOM   2953  O   WAT   471      38.216  13.894 -21.813  1.00  0.00
ATOM   2954  H1  WAT   471      38.162  14.828 -21.497  1.00  0.00
ATOM   2955  H2  WAT   471      38.722  13.509 -21.059  1.00  0.00
ATOM   2956  O   WAT   472      11.109 -12.561  31.357  1.00  0.00
ATOM   2957  H1  WAT   472      11.278 -11.824  30.719  1.00  0.00
ATOM   2958  H2  WAT   472      10.818 -13.258  30.738  1.00  0.00
ATOM   2959  O   WAT   473       0.764 -10.404 -21.960  1.00  0.00
ATOM   2960  H1  WAT   473       1.123 -10.017 -21.147  1.00  0.00
ATOM   2961  H2  WAT   473       0.857 -11.359 -21.777  1.00  0.00
ATOM   2962  O   WAT   474      17.276  40.255   6.595  1.00  0.00
ATOM   2963  H1  WAT   474      18.155  39.832   6.543  1.00  0.00
ATOM   2964  H2  WAT   474      16.870  39.920   5.761  1.00  0.00
ATOM   2965  O   WAT   475      25.082  12.337  35.584  1.00  0.00
ATOM   2966  H1  WAT   475      25.365  12.993  36.261  1.00  0.00
ATOM   2967  H2  WAT   475      24.803  12.949  34.867  1.00  0.00
ATOM   2968  O   WAT   476       2.438  10.374  37.904  1.00  0.00
ATOM   2969  H1  WAT   476       2.734   9.665  38.514  1.00  0.00
ATOM   2970  H2  WAT   476       2.970  10.143  37.107  1.00  0.00
ATOM   2971  O   WAT   477       8.947  22.725  14.568  1.00  0.00
ATOM   2972  H1  WAT   477       8.847  23.691  14.363  1.00  0.00
ATOM   2973  H2  WAT   477       8.446  22.368  13.784  1.00  0.00
ATOM   2974  O   WAT   478       7.521  21.690  -5.590  1.00  0.00
ATOM   2975  H1  WAT   478       7.634  21.209  -6.435  1.00  0.00
ATOM   2976  H2  WAT   478       7.603  22.613  -5.901  1.00  0.00
ATOM   2977  O   WAT   479      22.145  31.004  25.268  1.00  0.00
ATOM   2978  H1  WAT   479      21.246  31.367  25.152  1.00  0.00
ATOM   2979  H2  WAT   479      22.129  30.732  26.201  1.00  0.00
ATOM   2980  O   WAT   480      35.742  35.979  15.035  1.00  0.00
ATOM   2981  H1  WAT   480      36.507  36.010  14.423  1.00  0.00
ATOM   2982  H2  WAT   480      35.335  36.857  14.826  1.00  0.00
ATOM   2983  O   WAT   481      -4.135  32.831 -19.046  1.00  0.00
ATOM   2984  H1  WAT   481      -3.729  32.474 -19.868  1.00  0.00
ATOM   2985  H2  WAT   481      -4.261  33.763 -19.301  1.00  0.00
ATOM   2986  O   WAT   482      27.884  22.305  37.984  1.00  0.00
ATOM   2987  H1  WAT   482      27.369  22.571  38.779  1.00  0.00
ATOM   2988  H2  WAT   482      27.164  22.267  37.321  1.00  0.00
ATOM   2989  O   WAT   483      10.425  13.008 -19.558  1.00  0.00
ATOM   2990  H1  WAT   483       9.579  12.800 -20.041  1.00  0.00
ATOM   2991  H2  WAT   483      10.049  13.539 -18.820  1.00  0.00
ATOM   2992  O   WAT   484      29.730  22.777  30.532  1.00  0.00
ATOM   2993  H1  WAT   484      29.460  22.940  29.589  1.00  0.00
ATOM   2994  H2  WAT   484      29.358  23.588  30.937  1.00  0.00
ATOM   2995  O   WAT   485      23.818  15.444 -13.910  1.00  0.00
ATOM   2996  H1  WAT   485      23.216  15.674 -14.634  1.00  0.00
ATOM   2997  H2  WAT   485      23.387  15.891 -13.151  1.00  0.00
ATOM   2998  O   WAT   486      -4.749   4.543 -22.963  1.00  0.00
ATOM   2999  H1  WAT   486      -3.841   4.819 -23.188  1.00  0.00
ATOM   3000  H2  WAT   486      -5.264   5.206 -23.479  1.00  0.00
ATOM   3001  O   WAT   487      20.608  19.700  22.970  1.00  0.00
ATOM   3002  H1  WAT   487      20.342  20.556  22.573  1.00  0.00
ATOM   3003  H2  WAT   487      19.852  19.576  23.599  1.00  0.00
ATOM   3004  O   WAT   488      39.292 -15.632   0.642  1.00  0.00
ATOM   3005  H1  WAT   488      39.743 -14.773   0.755  1.00  0.00
ATOM   3006  H2  WAT   488      40.019 -16.250   0.819  1.00  0.00
ATOM   3007  O   WAT   489       8.117 -17.781 -25.069  1.00  0.00
ATOM   3008  H1  WAT   489       8.030 -17.889 -24.092  1.00  0.00
ATOM   3009  H2  WAT   489       9.011 -18.144 -25.203  1.00  0.00
ATOM   3010  O   WAT   490      21.139  27.998  29.213  1.00  0.00
ATOM   3011  H1  WAT   490      20.678  27.896  30.078  1.00  0.00
ATOM   3012  H2  WAT   490      20.379  27.928  28.606  1.00  0.00
ATOM   3013  O   WAT   491     -22.206   9.468  28.961  1.00  0.00
ATOM   3014  H1  WAT   491     -22.941   8.860  29.127  1.00  0.00
ATOM   3015  H2  WAT   491     -21.434   8.847  29.011  1.00  0.00
ATOM   3016  O   WAT   492      21.679   7.470  21.610  1.00  0.00
ATOM   3017  H1  WAT   492      22.322   8.192  21.441  1.00  0.00
ATOM   3018  H2  WAT   492      21.011   7.666  20.924  1.00  0.00
ATOM   3019  O   WAT   493      27.806  24.267 -24.452  1.00  0.00
ATOM   3020  H1  WAT   493      28.180  25.060 -24.887  1.00  0.00
ATOM   3021  H2  WAT   493      27.249  24.690 -23.768  1.00  0.00
ATOM   3022  O   WAT   494      22.479  24.476 -27.501  1.00  0.00
ATOM   3023  H1  WAT   494      22.599  25.187 -28.168  1.00  0.00
ATOM   3024  H2  WAT   494      21.529  24.623 -27.274  1.00  0.00
ATOM   3025  O   WAT   495      -6.295  30.595  18.515  1.00  0.00
ATOM   3026  H1  WAT   495      -5.721  31.377  18.625  1.00  0.00
ATOM   3027  H2  WAT   495      -5.760  30.079  17.860  1.00  0.00
ATOM   3028  O   WAT   496       1.190  -6.199  -9.144  1.00  0.00
ATOM   3029  H1  WAT   496       1.826  -6.451  -9.841  1.00  0.00
ATOM   3030  H2  WAT   496       1.147  -7.024  -8.625  1.00  0.00
ATOM   3031  O   WAT   497       7.234   8.064 -18.714  1.00  0.00
ATOM   3032  H1  WAT   497       7.362   8.035 -19.684  1.00  0.00
ATOM   3033  H2  WAT   497       6.278   7.873 -18.656  1.00  0.00
ATOM   3034  O   WAT   498      26.173  36.281  19.972  1.00  0.00
ATOM   3035  H1  WAT   498      26.283  37.171  19.587  1.00  0.00
ATOM   3036  H2  WAT   498      27.126  35.991  19.977  1.00  0.00
ATOM   3037  O   WAT   499      -3.275 -14.208 -22.357  1.00  0.00
ATOM   3038  H1  WAT   499      -4.016 -14.129 -21.707  1.00  0.00
ATOM   3039  H2  WAT   499      -2.516 -14.121 -21.730  1.00  0.00
ATOM   3040  O   WAT   500     -26.858  29.219 -25.438  1.00  0.00
ATOM   3041  H1  WAT   500     -25.984  29.090 -25.886  1.00  0.00
ATOM   3042  H2  WAT   500     -27.009  28.291 -25.139  1.00  0.00
ATOM   3043  O   WAT   501      19.692  23.461  -6.046  1.00  0.00
ATOM   3044  H1  WAT   501      18.902  23.838  -5.579  1.00  0.00
ATOM   3045  H2  WAT   501      19.351  23.489  -6.971  1.00  0.00
ATOM   3046  O   WAT   502     -25.994  24.411 -20.294  1.00  0.00
ATOM   3047  H1  WAT   502     -25.106  24.205 -19.940  1.00  0.00
ATOM   3048  H2  WAT   502     -25.862  24.132 -21.231  1.00  0.00
ATOM   3049  O   WAT   503     -15.599  18.164  40.140  1.00  0.00
ATOM   3050  H1  WAT   503     -15.440  18.076  41.113  1.00  0.00
ATOM   3051  H2  WAT   503     -16.533  17.852  40.112  1.00  0.00
ATOM   3052  O   WAT   504      14.084  25.529  -3.110  1.00  0.00
ATOM   3053  H1  WAT   504      13.174  25.908  -3.243  1.00  0.00
ATOM   3054  H2  WAT   504      14.173  25.699  -2.145  1.00  0.00
ATOM   3055  O   WAT   505      25.721  23.377  -6.219  1.00  0.00
ATOM   3056  H1  WAT   505      25.297  24.141  -5.753  1.00  0.00
ATOM   3057  H2  WAT   505      26.479  23.227  -5.618  1.00  0.00
ATOM   3058  O   WAT   506       3.618  27.513  18.714  1.00  0.00
ATOM   3059  H1  WAT   506       4.444  27.113  18.399  1.00  0.00
ATOM   3060  H2  WAT   506       3.432  27.005  19.514  1.00  0.00
ATOM   3061  O   WAT   507      21.754  13.593  30.816  1.00  0.00
ATOM   3062  H1  WAT   507      22.269  12.953  31.363  1.00  0.00
ATOM   3063  H2  WAT   507      20.884  13.534  31.257  1.00  0.00
ATOM   3064  O   WAT   508      22.982   9.042  32.066  1.00  0.00
ATOM   3065  H1  WAT   508      23.852   8.652  32.298  1.00  0.00
ATOM   3066  H2  WAT   508      22.866   8.695  31.164  1.00  0.00
ATOM   3067  O   WAT   509       2.584  13.790 -21.356  1.00  0.00
ATOM   3068  H1  WAT   509       3.168  13.767 -22.143  1.00  0.00
ATOM   3069  H2  WAT   509       1.878  14.390 -21.679  1.00  0.00
ATOM   3070  O   WAT   510       4.604  27.813 -21.410  1.00  0.00
ATOM   3071  H1  WAT   510       4.604  26.860 -21.672  1.00  0.00
ATOM   3072  H2  WAT   510       5.537  27.891 -21.115  1.00  0.00
ATOM   3073  O   WAT   511      22.584 -11.397  22.934  1.00  0.00
ATOM   3074  H1  WAT   511      21.760 -11.350  23.472  1.00  0.00
ATOM   3075  H2  WAT   511      23.018 -10.571  23.247  1.00  0.00
ATOM   3076  O   WAT   512      19.178  14.802 -17.164  1.00  0.00
ATOM   3077  H1  WAT   512      18.404  14.928 -16.565  1.00  0.00
ATOM   3078  H2  WAT   512      19.174  13.818 -17.234  1.00  0.00
ATOM   3079  O   WAT   513       5.903  15.729  30.388  1.00  0.00
ATOM   3080  H1  WAT   513       6.638  15.245  29.944  1.00  0.00
ATOM   3081  H2  WAT   513       6.250  16.645  30.350  1.00  0.00
ATOM   3082  O   WAT   514      -5.653 -17.656 -12.734  1.00  0.00
ATOM   3083  H1  WAT   514      -6.061 -18.303 -13.365  1.00  0.00
ATOM   3084  H2  WAT   514      -5.328 -16.997 -13.396  1.00  0.00
ATOM   3085  O   WAT   515      18.002   3.029  36.837  1.00  0.00
ATOM   3086  H1  WAT   515      17.982   3.978  36.572  1.00  0.00
ATOM   3087  H2  WAT   515      17.178   3.005  37.378  1.00  0.00
ATOM   3088  O   WAT   516       6.489  13.838  39.721  1.00  0.00
ATOM   3089  H1  WAT   516       6.525  13.719  40.691  1.00  0.00
ATOM   3090  H2  WAT   516       7.129  14.579  39.614  1.00  0.00
ATOM   3091  O   WAT   517     -15.932  38.462 -22.788  1.00  0.00
ATOM   3092  H1  WAT   517     -16.157  38.174 -23.683  1.00  0.00
ATOM   3093  H2  WAT   517     -15.737  37.599 -22.355  1.00  0.00
ATOM   3094  O   WAT   518      22.693  18.627 -15.416  1.00  0.00
ATOM   3095  H1  WAT   518      22.454  18.859 -14.494  1.00  0.00
ATOM   3096  H2  WAT   518      23.596  18.973 -15.471  1.00  0.00
ATOM   3097  O   WAT   519      22.361  -8.024 -21.750  1.00  0.00
ATOM   3098  H1  WAT   519      22.360  -8.626 -22.534  1.00  0.00
ATOM   3099  H2  WAT   519      21.412  -8.074 -21.516  1.00  0.00
ATOM   3100  O   WAT   520       8.727  23.470 -13.852  1.00  0.00
ATOM   3101  H1  WAT   520       9.287  24.222 -13.556  1.00  0.00
ATOM   3102  H2  WAT   520       7.926  23.980 -14.142  1.00  0.00
ATOM   3103  O   WAT   521      24.168  -3.820   0.669  1.00  0.00
ATOM   3104  H1  WAT   521      24.149  -3.363  -0.193  1.00  0.00
ATOM   3105  H2  WAT   521      23.788  -3.115   1.244  1.00  0.00
ATOM   3106  O   WAT   522      -2.703  13.761  -7.627  1.00  0.00
ATOM   3107  H1  WAT   522      -3.531  14.264  -7.636  1.00  0.00
ATOM   3108  H2  WAT   522      -2.881  13.085  -8.316  1.00  0.00
ATOM   3109  O   WAT   523       3.647 -12.707  27.969  1.00  0.00
ATOM   3110  H1  WAT   523       4.559 -13.026  27.734  1.00  0.00
ATOM   3111  H2  WAT   523       3.393 -13.488  28.536  1.00  0.00
ATOM   3112  O   WAT   524      29.153  25.441  19.597  1.00  0.00
ATOM   3113  H1  WAT   524      28.400  24.974  19.150  1.00  0.00
ATOM   3114  H2  WAT   524      28.686  26.300  19.783  1.00  0.00
ATOM   3115  O   WAT   525       5.800  22.434  17.231  1.00  0.00
ATOM   3116  H1  WAT   525       5.678  22.315  16.273  1.00  0.00
ATOM   3117  H2  WAT   525       5.019  22.979  17.453  1.00  0.00
ATOM   3118  O   WAT   526      25.835  16.772 -15.738  1.00  0.00
ATOM   3119  H1  WAT   526      26.752  16.454 -15.636  1.00  0.00
ATOM   3120  H2  WAT   526      25.395  16.324 -14.992  1.00  0.00
ATOM   3121  O   WAT   527      40.477  28.632  31.356  1.00  0.00
ATOM   3122  H1  WAT   527      40.866  29.024  30.536  1.00  0.00
ATOM   3123  H2  WAT   527      40.576  29.406  31.959  1.00  0.00
ATOM   3124  O   WAT   528      12.662  37.694 -20.944  1.00  0.00
ATOM   3125  H1  WAT   528      13.185  38.214 -20.290  1.00  0.00
ATOM   3126  H2  WAT   528      12.619  38.350 -21.672  1.00  0.00
ATOM   3127  O   WAT   529      17.198  23.536  31.457  1.00  0.00
ATOM   3128  H1  WAT   529      17.064  22.703  31.957  1.00  0.00
ATOM   3129  H2  WAT   529      16.434  23.447  30.818  1.00  0.00
ATOM   3130  O   WAT   530       5.629  35.760  41.298  1.00  0.00
ATOM   3131  H1  WAT   530       6.427  35.998  41.816  1.00  0.00
ATOM   3132  H2  WAT   530       4.932  36.156  41.861  1.00  0.00
ATOM   3133  O   WAT   531      11.910  35.773 -25.698  1.00  0.00
ATOM   3134  H1  WAT   531      11.067  35.303 -25.502  1.00  0.00
ATOM   3135  H2  WAT   531      12.275  35.811 -24.776  1.00  0.00
ATOM   3136  O   WAT   532       2.290  16.158  35.875  1.00  0.00
ATOM   3137  H1  WAT   532       2.974  16.214  36.579  1.00  0.00
ATOM   3138  H2  WAT   532       1.486  16.354  36.386  1.00  0.00
ATOM   3139  O   WAT   533      25.928  17.849  26.591  1.00  0.00
ATOM   3140  H1  WAT   533      26.343  17.032  26.208  1.00  0.00
ATOM   3141  H2  WAT   533      25.484  17.452  27.368  1.00  0.00
ATOM   3142  O   WAT   534      -9.125 -11.983  29.909  1.00  0.00
ATOM   3143  H1  WAT   534     -10.018 -11.885  30.301  1.00  0.00
ATOM   3144  H2  WAT   534      -9.079 -12.954  29.821  1.00  0.00
ATOM   3145  O   WAT   535       4.701   1.620 -20.149  1.00  0.00
ATOM   3146  H1  WAT   535       5.610   1.846 -20.457  1.00  0.00
ATOM   3147  H2  WAT   535       4.267   2.494 -20.280  1.00  0.00
ATOM   3148  O   WAT   536     -14.428  -8.135  -6.618  1.00  0.00
ATOM   3149  H1  WAT   536     -15.165  -7.516  -6.853  1.00  0.00
ATOM   3150  H2  WAT   536     -14.457  -8.697  -7.435  1.00  0.00
ATOM   3151  O   WAT   537      -5.851  24.168  22.703  1.00  0.00
ATOM   3152  H1  WAT   537      -4.963  24.018  23.100  1.00  0.00
ATOM   3153  H2  WAT   537      -5.985  23.302  22.270  1.00  0.00
ATOM   3154  O   WAT   538      13.897  18.871  31.082  1.00  0.00
ATOM   3155  H1  WAT   538      14.506  18.710  30.334  1.00  0.00
ATOM   3156  H2  WAT   538      14.291  18.243  31.746  1.00  0.00
ATOM   3157  O   WAT   539      14.603  15.791 -14.679  1.00  0.00
ATOM   3158  H1  WAT   539      14.083  15.456 -13.920  1.00  0.00
ATOM   3159  H2  WAT   539      14.249  16.705 -14.732  1.00  0.00
ATOM   3160  O   WAT   540      13.727  14.609 -16.787  1.00  0.00
ATOM   3161  H1  WAT   540      14.088  13.703 -16.811  1.00  0.00
ATOM   3162  H2  WAT   540      14.174  14.961 -15.984  1.00  0.00
ATOM   3163  O   WAT   541       5.420  -9.917  -4.401  1.00  0.00
ATOM   3164  H1  WAT   541       6.275  -9.715  -4.848  1.00  0.00
ATOM   3165  H2  WAT   541       5.734 -10.115  -3.499  1.00  0.00
ATOM   3166  O   WAT   542      22.061  -5.262   0.127  1.00  0.00
ATOM   3167  H1  WAT   542      21.841  -4.768  -0.704  1.00  0.00
ATOM   3168  H2  WAT   542      22.987  -4.920   0.244  1.00  0.00
ATOM   3169  O   WAT   543      40.311  16.013  17.628  1.00  0.00
ATOM   3170  H1  WAT   543      40.240  15.146  18.087  1.00  0.00
ATOM   3171  H2  WAT   543      41.165  16.331  17.998  1.00  0.00
ATOM   3172  O   WAT   544      19.645  32.810  22.298  1.00  0.00
ATOM   3173  H1  WAT   544      20.542  32.615  21.971  1.00  0.00
ATOM   3174  H2  WAT   544      19.175  31.993  22.028  1.00  0.00
ATOM   3175  O   WAT   545       7.249 -17.552  34.739  1.00  0.00
ATOM   3176  H1  WAT   545       7.109 -16.846  35.402  1.00  0.00
ATOM   3177  H2  WAT   545       6.321 -17.734  34.482  1.00  0.00
ATOM   3178  O   WAT   546      34.645  38.311  15.147  1.00  0.00
ATOM   3179  H1  WAT   546      35.462  38.863  15.113  1.00  0.00
ATOM   3180  H2  WAT   546      34.315  38.552  16.031  1.00  0.00
ATOM   3181  O   WAT   547      17.548  24.702  -5.058  1.00  0.00
ATOM   3182  H1  WAT   547      17.242  25.532  -4.623  1.00  0.00
ATOM   3183  H2  WAT   547      16.676  24.362  -5.367  1.00  0.00
ATOM   3184  O   WAT   548      21.655  -0.954 -20.199  1.00  0.00
ATOM   3185  H1  WAT   548      22.053  -1.781 -19.860  1.00  0.00
ATOM   3186  H2  WAT   548      22.461  -0.555 -20.633  1.00  0.00
ATOM   3187  O   WAT   549      36.542  10.691  14.617  1.00  0.00
ATOM   3188  H1  WAT   549      36.728   9.772  14.892  1.00  0.00
ATOM   3189  H2  WAT   549      35.866  10.951  15.271  1.00  0.00
ATOM   3190  O   WAT   550      38.534  22.049  36.697  1.00  0.00
ATOM   3191  H1  WAT   550      37.672  22.260  37.107  1.00  0.00
ATOM   3192  H2  WAT   550      38.379  22.401  35.778  1.00  0.00
ATOM   3193  O   WAT   551       8.052  11.327 -15.837  1.00  0.00
ATOM   3194  H1  WAT   551       7.835  11.657 -14.923  1.00  0.00
ATOM   3195  H2  WAT   551       8.635  10.580 -15.601  1.00  0.00
ATOM   3196  O   WAT   552       8.178  12.326 -20.445  1.00  0.00
ATOM   3197  H1  WAT   552       8.005  11.628 -19.777  1.00  0.00
ATOM   3198  H2  WAT   552       7.406  12.907 -20.316  1.00  0.00
ATOM   3199  O   WAT   553       9.087  31.379   7.422  1.00  0.00
ATOM   3200  H1  WAT   553       8.560  31.440   6.588  1.00  0.00
ATOM   3201  H2  WAT   553       9.718  32.126   7.243  1.00  0.00
ATOM   3202  O   WAT   554       8.461  22.867  33.619  1.00  0.00
ATOM   3203  H1  WAT   554       8.309  21.899  33.765  1.00  0.00
ATOM   3204  H2  WAT   554       9.181  22.815  32.957  1.00  0.00
ATOM   3205  O   WAT   555      36.982  19.975  39.455  1.00  0.00
ATOM   3206  H1  WAT   555      36.600  19.440  38.710  1.00  0.00
ATOM   3207  H2  WAT   555      37.935  19.842  39.250  1.00  0.00
ATOM   3208  O   WAT   556      35.733  11.640  24.796  1.00  0.00
ATOM   3209  H1  WAT   556      35.764  12.324  25.491  1.00  0.00
ATOM   3210  H2  WAT   556      34.766  11.502  24.714  1.00  0.00
ATOM   3211  O   WAT   557       4.261  -4.912  34.950  1.00  0.00
ATOM   3212  H1  WAT   557       4.273  -4.776  35.940  1.00  0.00
ATOM   3213  H2  WAT   557       4.794  -5.748  34.924  1.00  0.00
ATOM   3214  O   WAT   558      37.122  15.928  39.090  1.00  0.00
ATOM   3215  H1  WAT   558      37.995  15.701  38.667  1.00  0.00
ATOM   3216  H2  WAT   558      37.423  15.991  40.023  1.00  0.00
ATOM   3217  O   WAT   559      28.224  38.190  17.063  1.00  0.00
ATOM   3218  H1  WAT   559      28.918  38.809  16.700  1.00  0.00
ATOM   3219  H2  WAT   559      28.804  37.387  17.152  1.00  0.00
ATOM   3220  O   WAT   560      29.868   5.059 -13.474  1.00  0.00
ATOM   3221  H1  WAT   560      30.496   4.900 -14.205  1.00  0.00
ATOM   3222  H2  WAT   560      29.347   5.795 -13.829  1.00  0.00
ATOM   3223  O   WAT   561      17.302  18.209  36.124  1.00  0.00
ATOM   3224  H1  WAT   561      16.393  18.038  35.774  1.00  0.00
ATOM   3225  H2  WAT   561      17.814  17.573  35.586  1.00  0.00
ATOM   3226  O   WAT   562      -3.375   5.617  21.097  1.00  0.00
ATOM   3227  H1  WAT   562      -4.367   5.600  21.117  1.00  0.00
ATOM   3228  H2  WAT   562      -3.238   5.086  20.272  1.00  0.00
ATOM   3229  O   WAT   563      36.316   9.879  18.233  1.00  0.00
ATOM   3230  H1  WAT   563      35.964   9.193  17.639  1.00  0.00
ATOM   3231  H2  WAT   563      36.149   9.428  19.107  1.00  0.00
ATOM   3232  O   WAT   564      19.006 -13.154  25.601  1.00  0.00
ATOM   3233  H1  WAT   564      18.767 -14.041  25.254  1.00  0.00
ATOM   3234  H2  WAT   564      18.367 -13.101  26.353  1.00  0.00
ATOM   3235  O   WAT   565      23.188   4.279  34.564  1.00  0.00
ATOM   3236  H1  WAT   565      22.822   3.783  35.346  1.00  0.00
ATOM   3237  H2  WAT   565      22.443   4.080  33.934  1.00  0.00
ATOM   3238  O   WAT   566     -25.162  23.468 -22.763  1.00  0.00
ATOM   3239  H1  WAT   566     -24.821  24.323 -23.084  1.00  0.00
ATOM   3240  H2  WAT   566     -25.692  23.170 -23.532  1.00  0.00
ATOM   3241  O   WAT   567       6.300  12.757  24.508  1.00  0.00
ATOM   3242  H1  WAT   567       5.724  11.974  24.594  1.00  0.00
ATOM   3243  H2  WAT   567       5.990  13.300  25.265  1.00  0.00
ATOM   3244  O   WAT   568     -26.459  -2.750  39.267  1.00  0.00
ATOM   3245  H1  WAT   568     -26.017  -2.052  38.742  1.00  0.00
ATOM   3246  H2  WAT   568     -27.030  -3.156  38.593  1.00  0.00
ATOM   3247  O   WAT   569      13.700 -11.051 -26.329  1.00  0.00
ATOM   3248  H1  WAT   569      13.628 -10.735 -25.402  1.00  0.00
ATOM   3249  H2  WAT   569      12.763 -11.322 -26.479  1.00  0.00
ATOM   3250  O   WAT   570     -17.547  22.267  38.472  1.00  0.00
ATOM   3251  H1  WAT   570     -17.258  21.337  38.390  1.00  0.00
ATOM   3252  H2  WAT   570     -17.570  22.511  37.515  1.00  0.00
ATOM   3253  O   WAT   571      35.420   0.393  38.697  1.00  0.00
ATOM   3254  H1  WAT   571      34.871   0.468  37.898  1.00  0.00
ATOM   3255  H2  WAT   571      34.744   0.137  39.363  1.00  0.00
ATOM   3256  O   WAT   572      15.081  -2.473  31.308  1.00  0.00
ATOM   3257  H1  WAT   572      15.051  -1.919  30.493  1.00  0.00
ATOM   3258  H2  WAT   572      15.603  -1.877  31.889  1.00  0.00
ATOM   3259  O   WAT   573       9.436   0.182  39.228  1.00  0.00
ATOM   3260  H1  WAT   573      10.328   0.092  39.633  1.00  0.00
ATOM   3261  H2  WAT   573       9.545  -0.419  38.451  1.00  0.00
ATOM   3262  O   WAT   574      38.387  -6.648  23.851  1.00  0.00
ATOM   3263  H1  WAT   574      39.305  -6.535  24.169  1.00  0.00
ATOM   3264  H2  WAT   574      38.493  -6.422  22.903  1.00  0.00
ATOM   3265  O   WAT   575       9.374   9.454  22.796  1.00  0.00
ATOM   3266  H1  WAT   575       8.500   9.060  23.001  1.00  0.00
ATOM   3267  H2  WAT   575       9.140  10.007  22.023  1.00  0.00
ATOM   3268  O   WAT   576     -28.526   6.256 -14.069  1.00  0.00
ATOM   3269  H1  WAT   576     -28.820   5.406 -14.466  1.00  0.00
ATOM   3270  H2  WAT   576     -29.102   6.877 -14.571  1.00  0.00
ATOM   3271  O   WAT   577      25.540   9.549   3.900  1.00  0.00
ATOM   3272  H1  WAT   577      26.378  10.048   3.812  1.00  0.00
ATOM   3273  H2  WAT   577      25.543   9.034   3.074  1.00  0.00
ATOM   3274  O   WAT   578      30.614  21.753  34.521  1.00  0.00
ATOM   3275  H1  WAT   578      30.073  21.469  33.761  1.00  0.00
ATOM   3276  H2  WAT   578      30.113  21.363  35.265  1.00  0.00
ATOM   3277  O   WAT   579      21.568  -3.367  21.506  1.00  0.00
ATOM   3278  H1  WAT   579      20.990  -3.349  22.295  1.00  0.00
ATOM   3279  H2  WAT   579      20.946  -3.115  20.807  1.00  0.00
ATOM   3280  O   WAT   580     -27.878   0.090  29.362  1.00  0.00
ATOM   3281  H1  WAT   580     -28.487  -0.631  29.621  1.00  0.00
ATOM   3282  H2  WAT   580     -27.781  -0.108  28.400  1.00  0.00
ATOM   3283  O   WAT   581      28.940  37.610 -14.672  1.00  0.00
ATOM   3284  H1  WAT   581      28.088  37.150 -14.536  1.00  0.00
ATOM   3285  H2  WAT   581      28.660  38.280 -15.345  1.00  0.00
ATOM   3286  O   WAT   582      25.495 -15.729  32.337  1.00  0.00
ATOM   3287  H1  WAT   582      24.796 -15.702  33.044  1.00  0.00
ATOM   3288  H2  WAT   582      24.928 -16.039  31.592  1.00  0.00
ATOM   3289  O   WAT   583      22.121  11.834  38.565  1.00  0.00
ATOM   3290  H1  WAT   583      21.187  12.146  38.658  1.00  0.00
ATOM   3291  H2  WAT   583      22.554  12.723  38.493  1.00  0.00
ATOM   3292  O   WAT   584      17.535  -4.004  27.774  1.00  0.00
ATOM   3293  H1  WAT   584      17.762  -4.791  27.221  1.00  0.00
ATOM   3294  H2  WAT   584      16.590  -3.900  27.496  1.00  0.00
ATOM   3295  O   WAT   585     -26.047   5.978  20.342  1.00  0.00
ATOM   3296  H1  WAT   585     -26.003   5.403  21.138  1.00  0.00
ATOM   3297  H2  WAT   585     -25.131   6.324  20.332  1.00  0.00
ATOM   3298  O   WAT   586     -27.597 -16.911  12.278  1.00  0.00
ATOM   3299  H1  WAT   586     -26.899 -17.220  11.641  1.00  0.00
ATOM   3300  H2  WAT   586     -28.316 -17.537  12.025  1.00  0.00
ATOM   3301  O   WAT   587     -24.028   7.093  31.687  1.00  0.00
ATOM   3302  H1  WAT   587     -24.099   6.993  30.709  1.00  0.00
ATOM   3303  H2  WAT   587     -24.284   6.196  31.970  1.00  0.00
ATOM   3304  O   WAT   588      13.941 -10.352 -23.534  1.00  0.00
ATOM   3305  H1  WAT   588      13.812 -11.301 -23.308  1.00  0.00
ATOM   3306  H2  WAT   588      14.926 -10.304 -23.449  1.00  0.00
ATOM   3307  O   WAT   589     -26.304  14.162  12.010  1.00  0.00
ATOM   3308  H1  WAT   589     -25.789  14.077  12.833  1.00  0.00
ATOM   3309  H2  WAT   589     -25.590  14.187  11.351  1.00  0.00
ATOM   3310  O   WAT   590      24.229  25.228  -4.831  1.00  0.00
ATOM   3311  H1  WAT   590      23.375  24.879  -5.200  1.00  0.00
ATOM   3312  H2  WAT   590      23.891  26.062  -4.438  1.00  0.00
ATOM   3313  O   WAT   591      26.421  14.036  -1.321  1.00  0.00
ATOM   3314  H1  WAT   591      25.728  14.091  -1.995  1.00  0.00
ATOM   3315  H2  WAT   591      26.331  14.896  -0.873  1.00  0.00
ATOM   3316  O   WAT   592      33.648  32.140  20.694  1.00  0.00
ATOM   3317  H1  WAT   592      33.110  31.819  21.455  1.00  0.00
ATOM   3318  H2  WAT   592      33.427  33.101  20.749  1.00  0.00
ATOM   3319  O   WAT   593     -20.163  14.685  12.380  1.00  0.00
ATOM   3320  H1  WAT   593     -20.159  14.889  11.412  1.00  0.00
ATOM   3321  H2  WAT   593     -19.867  13.761  12.365  1.00  0.00
ATOM   3322  O   WAT   594      28.389  -5.853  23.648  1.00  0.00
ATOM   3323  H1  WAT   594      28.620  -6.071  22.731  1.00  0.00
ATOM   3324  H2  WAT   594      29.264  -5.558  23.987  1.00  0.00
ATOM   3325  O   WAT   595      24.501  -0.419 -15.930  1.00  0.00
ATOM   3326  H1  WAT   595      25.400  -0.250 -16.265  1.00  0.00
ATOM   3327  H2  WAT   595      24.571  -0.080 -15.015  1.00  0.00
ATOM   3328  O   WAT   596      39.739  26.167  25.981  1.00  0.00
ATOM   3329  H1  WAT   596      39.328  25.381  25.553  1.00  0.00
ATOM   3330  H2  WAT   596      40.124  25.738  26.777  1.00  0.00
ATOM   3331  O   WAT   597      15.673   5.759  27.329  1.00  0.00
ATOM   3332  H1  WAT   597      16.369   6.158  26.774  1.00  0.00
ATOM   3333  H2  WAT   597      16.200   5.116  27.849  1.00  0.00
ATOM   3334  O   WAT   598      19.432  25.563  17.854  1.00  0.00
ATOM   3335  H1  WAT   598      18.572  25.575  17.369  1.00  0.00
ATOM   3336  H2  WAT   598      19.272  26.347  18.439  1.00  0.00
ATOM   3337  O   WAT   599      41.605  17.984  11.019  1.00  0.00
ATOM   3338  H1  WAT   599      42.587  17.868  10.889  1.00  0.00
ATOM   3339  H2  WAT   599      41.512  17.423  11.831  1.00  0.00
ATOM   3340  O   WAT   600     -29.382  18.541 -11.654  1.00  0.00
ATOM   3341  H1  WAT   600     -29.135  19.380 -12.112  1.00  0.00
ATOM   3342  H2  WAT   600     -28.738  18.587 -10.904  1.00  0.00
ATOM   3343  O   WAT   601      11.890   5.829  36.658  1.00  0.00
ATOM   3344  H1  WAT   601      11.053   5.842  36.156  1.00  0.00
ATOM   3345  H2  WAT   601      11.749   5.022  37.200  1.00  0.00
ATOM   3346  O   WAT   602     -17.616  25.070  13.047  1.00  0.00
ATOM   3347  H1  WAT   602     -17.660  24.526  13.875  1.00  0.00
ATOM   3348  H2  WAT   602     -16.725  25.471  13.187  1.00  0.00
ATOM   3349  O   WAT   603       4.871 -19.998   6.416  1.00  0.00
ATOM   3350  H1  WAT   603       5.753 -19.790   6.813  1.00  0.00
ATOM   3351  H2  WAT   603       5.001 -19.623   5.525  1.00  0.00
ATOM   3352  O   WAT   604      22.429  -5.146  19.314  1.00  0.00
ATOM   3353  H1  WAT   604      22.032  -4.517  18.686  1.00  0.00
ATOM   3354  H2  WAT   604      22.254  -4.687  20.162  1.00  0.00
ATOM   3355  O   WAT   605     -29.630  29.094  15.269  1.00  0.00
ATOM   3356  H1  WAT   605     -30.574  29.120  15.471  1.00  0.00
ATOM   3357  H2  WAT   605     -29.291  28.473  15.936  1.00  0.00
ATOM   3358  O   WAT   606      11.081   0.863  32.001  1.00  0.00
ATOM   3359  H1  WAT   606      11.122   0.123  32.636  1.00  0.00
ATOM   3360  H2  WAT   606      12.007   1.169  32.005  1.00  0.00
ATOM   3361  O   WAT   607     -21.831  21.747  29.436  1.00  0.00
ATOM   3362  H1  WAT   607     -22.318  21.528  28.617  1.00  0.00
ATOM   3363  H2  WAT   607     -20.967  22.019  29.053  1.00  0.00
ATOM   3364  O   WAT   608      22.527 -14.503  12.272  1.00  0.00
ATOM   3365  H1  WAT   608      21.831 -13.820  12.157  1.00  0.00
ATOM   3366  H2  WAT   608      22.116 -15.025  13.010  1.00  0.00
ATOM   3367  O   WAT   609     -28.270  22.521  21.603  1.00  0.00
ATOM   3368  H1  WAT   609     -28.556  23.361  21.168  1.00  0.00
ATOM   3369  H2  WAT   609     -28.954  21.919  21.224  1.00  0.00
ATOM   3370  O   WAT   610      32.254  -3.147  19.463  1.00  0.00
ATOM   3371  H1  WAT   610      32.558  -3.022  20.389  1.00  0.00
ATOM   3372  H2  WAT   610      31.603  -2.396  19.424  1.00  0.00
ATOM   3373  O   WAT   611      33.285   1.743  32.669  1.00  0.00
ATOM   3374  H1  WAT   611      32.922   1.360  31.837  1.00  0.00
ATOM   3375  H2  WAT   611      32.495   2.275  32.946  1.00  0.00
ATOM   3376  O   WAT   612      19.063  -3.804  -9.970  1.00  0.00
ATOM   3377  H1  WAT   612      20.024  -3.655  -9.811  1.00  0.00
ATOM   3378  H2  WAT   612      18.915  -4.553  -9.362  1.00  0.00
ATOM   3379  O   WAT   613      36.124  15.409  30.625  1.00  0.00
ATOM   3380  H1  WAT   613      36.214  16.250  30.125  1.00  0.00
ATOM   3381  H2  WAT   613      36.862  14.901  30.211  1.00  0.00
ATOM   3382  O   WAT   614      18.559  -9.700   2.376  1.00  0.00
ATOM   3383  H1  WAT   614      18.111  -9.513   3.243  1.00  0.00
ATOM   3384  H2  WAT   614      17.837  -9.355   1.781  1.00  0.00
ATOM   3385  O   WAT   615      25.996   9.481  19.464  1.00  0.00
ATOM   3386  H1  WAT   615      25.710   9.151  20.344  1.00  0.00
ATOM   3387  H2  WAT   615      26.962   9.422  19.558  1.00  0.00
ATOM   3388  O   WAT   616      30.983  -0.902  33.555  1.00  0.00
ATOM   3389  H1  WAT   616      31.269  -0.457  32.724  1.00  0.00
ATOM   3390  H2  WAT   616      30.134  -0.456  33.709  1.00  0.00
ATOM   3391  O   WAT   617      20.923  27.701   2.780  1.00  0.00
ATOM   3392  H1  WAT   617      21.770  28.186   2.915  1.00  0.00
ATOM   3393  H2  WAT   617      21.163  27.182   1.985  1.00  0.00
ATOM   3394  O   WAT   618      23.260  18.781   2.869  1.00  0.00
ATOM   3395  H1  WAT   618      23.102  18.973   1.912  1.00  0.00
ATOM   3396  H2  WAT   618      23.536  17.828   2.772  1.00  0.00
ATOM   3397  O   WAT   619      22.902   9.645  20.484  1.00  0.00
ATOM   3398  H1  WAT   619      23.486  10.224  21.013  1.00  0.00
ATOM   3399  H2  WAT   619      22.152  10.262  20.327  1.00  0.00
ATOM   3400  O   WAT   620      28.453   2.239  27.208  1.00  0.00
ATOM   3401  H1  WAT   620      27.529   1.906  27.306  1.00  0.00
ATOM   3402  H2  WAT   620      28.652   1.895  26.306  1.00  0.00
ATOM   3403  O   WAT   621      37.334   1.518  34.256  1.00  0.00
ATOM   3404  H1  WAT   621      36.757   2.299  34.107  1.00  0.00
ATOM   3405  H2  WAT   621      37.857   1.535  33.426  1.00  0.00
ATOM   3406  O   WAT   622      -2.890  -5.205  26.610  1.00  0.00
ATOM   3407  H1  WAT   622      -2.498  -5.940  27.109  1.00  0.00
ATOM   3408  H2  WAT   622      -3.785  -5.578  26.425  1.00  0.00
ATOM   3409  O   WAT   623       5.539   2.856  30.044  1.00  0.00
ATOM   3410  H1  WAT   623       5.835   3.294  29.206  1.00  0.00
ATOM   3411  H2  WAT   623       4.571   3.053  29.967  1.00  0.00
ATOM   3412  O   WAT   624      19.796   3.360  21.312  1.00  0.00
ATOM   3413  H1  WAT   624      19.584   2.671  21.984  1.00  0.00
ATOM   3414  H2  WAT   624      20.146   4.066  21.912  1.00  0.00
ATOM   3415  O   WAT   625     -19.105   8.984  35.460  1.00  0.00
ATOM   3416  H1  WAT   625     -19.917   8.761  35.958  1.00  0.00
ATOM   3417  H2  WAT   625     -18.480   9.127  36.211  1.00  0.00
ATOM   3418  O   WAT   626      11.075  -5.845   7.064  1.00  0.00
ATOM   3419  H1  WAT   626      10.231  -5.706   7.556  1.00  0.00
ATOM   3420  H2  WAT   626      11.210  -6.803   7.268  1.00  0.00
ATOM   3421  O   WAT   627      23.942 -16.351  26.284  1.00  0.00
ATOM   3422  H1  WAT   627      23.360 -16.994  26.748  1.00  0.00
ATOM   3423  H2  WAT   627      24.701 -16.329  26.901  1.00  0.00
ATOM   3424  O   WAT   628      27.232   5.259 -20.161  1.00  0.00
ATOM   3425  H1  WAT   628      27.484   4.496 -20.748  1.00  0.00
ATOM   3426  H2  WAT   628      27.751   5.015 -19.364  1.00  0.00
ATOM   3427  O   WAT   629      -1.626  18.334 -19.994  1.00  0.00
ATOM   3428  H1  WAT   629      -2.036  18.095 -19.135  1.00  0.00
ATOM   3429  H2  WAT   629      -2.009  17.634 -20.565  1.00  0.00
ATOM   3430  O   WAT   630      22.553  19.802  39.736  1.00  0.00
ATOM   3431  H1  WAT   630      23.052  20.652  39.670  1.00  0.00
ATOM   3432  H2  WAT   630      21.646  20.120  39.594  1.00  0.00
ATOM   3433  O   WAT   631      14.917  -6.835  32.894  1.00  0.00
ATOM   3434  H1  WAT   631      15.209  -7.633  33.403  1.00  0.00
ATOM   3435  H2  WAT   631      14.043  -7.172  32.584  1.00  0.00
ATOM   3436  O   WAT   632      31.444  20.863  14.538  1.00  0.00
ATOM   3437  H1  WAT   632      31.058  20.167  15.106  1.00  0.00
ATOM   3438  H2  WAT   632      31.094  20.611  13.664  1.00  0.00
ATOM   3439  O   WAT   633      36.010 -13.356  24.212  1.00  0.00
ATOM   3440  H1  WAT   633      35.938 -14.030  23.498  1.00  0.00
ATOM   3441  H2  WAT   633      35.501 -13.817  24.926  1.00  0.00
ATOM   3442  O   WAT   634      24.382  23.314 -17.783  1.00  0.00
ATOM   3443  H1  WAT   634      23.573  23.747 -18.092  1.00  0.00
ATOM   3444  H2  WAT   634      24.589  22.724 -18.530  1.00  0.00
ATOM   3445  O   WAT   635      10.073  17.684  26.741  1.00  0.00
ATOM   3446  H1  WAT   635      11.058  17.631  26.739  1.00  0.00
ATOM   3447  H2  WAT   635       9.943  18.569  26.360  1.00  0.00
ATOM   3448  O   WAT   636      23.489 -14.405  36.486  1.00  0.00
ATOM   3449  H1  WAT   636      24.067 -14.339  37.271  1.00  0.00
ATOM   3450  H2  WAT   636      23.115 -13.503  36.460  1.00  0.00
ATOM   3451  O   WAT   637      24.873  23.318   2.997  1.00  0.00
ATOM   3452  H1  WAT   637      23.962  23.201   2.638  1.00  0.00
ATOM   3453  H2  WAT   637      25.362  22.747   2.350  1.00  0.00
ATOM   3454  O   WAT   638      25.423 -13.240  17.586  1.00  0.00
ATOM   3455  H1  WAT   638      26.220 -12.727  17.804  1.00  0.00
ATOM   3456  H2  WAT   638      25.261 -12.929  16.667  1.00  0.00
ATOM   3457  O   WAT   639      37.750  -8.446  30.091  1.00  0.00
ATOM   3458  H1  WAT   639      37.707  -9.102  29.339  1.00  0.00
ATOM   3459  H2  WAT   639      37.160  -8.946  30.718  1.00  0.00
ATOM   3460  O   WAT   640      24.094   4.645   8.288  1.00  0.00
ATOM   3461  H1  WAT   640      24.243   4.627   7.305  1.00  0.00
ATOM   3462  H2  WAT   640      25.028   4.639   8.584  1.00  0.00
ATOM   3463  O   WAT   641     -17.654  13.059   2.420  1.00  0.00
ATOM   3464  H1  WAT   641     -16.914  12.991   3.058  1.00  0.00
ATOM   3465  H2  WAT   641     -18.375  12.656   2.941  1.00  0.00
ATOM   3466  O   WAT   642      15.286  -4.726   9.057  1.00  0.00
ATOM   3467  H1  WAT   642      15.655  -4.947   8.147  1.00  0.00
ATOM   3468  H2  WAT   642      15.430  -5.608   9.469  1.00  0.00
ATOM   3469  O   WAT   643       9.827 -12.934  11.019  1.00  0.00
ATOM   3470  H1  WAT   643       9.438 -12.999  11.921  1.00  0.00
ATOM   3471  H2  WAT   643      10.111 -13.864  10.897  1.00  0.00
ATOM   3472  O   WAT   644      19.043  21.788  -4.186  1.00  0.00
ATOM   3473  H1  WAT   644      19.785  21.122  -4.320  1.00  0.00
ATOM   3474  H2  WAT   644      19.309  22.406  -4.915  1.00  0.00
ATOM   3475  O   WAT   645      21.016  15.193  -1.074  1.00  0.00
ATOM   3476  H1  WAT   645      20.685  16.118  -1.039  1.00  0.00
ATOM   3477  H2  WAT   645      21.288  15.176  -2.031  1.00  0.00
ATOM   3478  O   WAT   646      36.889  -1.864  37.901  1.00  0.00
ATOM   3479  H1  WAT   646      36.525  -1.293  38.606  1.00  0.00
ATOM   3480  H2  WAT   646      36.442  -1.479  37.116  1.00  0.00
ATOM   3481  O   WAT   647      33.876  11.304  15.561  1.00  0.00
ATOM   3482  H1  WAT   647      33.616  11.672  14.695  1.00  0.00
ATOM   3483  H2  WAT   647      33.123  10.690  15.723  1.00  0.00
ATOM   3484  O   WAT   648      28.883   5.896  15.119  1.00  0.00
ATOM   3485  H1  WAT   648      28.600   6.125  16.027  1.00  0.00
ATOM   3486  H2  WAT   648      28.100   5.426  14.785  1.00  0.00
ATOM   3487  O   WAT   649      32.268   1.755  -8.686  1.00  0.00
ATOM   3488  H1  WAT   649      32.496   1.781  -9.645  1.00  0.00
ATOM   3489  H2  WAT   649      32.608   2.638  -8.421  1.00  0.00
ATOM   3490  O   WAT   650      37.896  31.670  12.609  1.00  0.00
ATOM   3491  H1  WAT   650      36.942  31.765  12.413  1.00  0.00
ATOM   3492  H2  WAT   650      38.243  31.432  11.724  1.00  0.00
ATOM   3493  O   WAT   651      22.425  17.587  19.702  1.00  0.00
ATOM   3494  H1  WAT   651      22.080  17.428  18.794  1.00  0.00
ATOM   3495  H2  WAT   651      21.656  17.290  20.234  1.00  0.00
ATOM   3496  O   WAT   652     -18.868  -4.944   4.325  1.00  0.00
ATOM   3497  H1  WAT   652     -19.501  -4.255   4.004  1.00  0.00
ATOM   3498  H2  WAT   652     -18.886  -4.725   5.289  1.00  0.00
ATOM   3499  O   WAT   653       2.322  40.623  -2.357  1.00  0.00
ATOM   3500  H1  WAT   653       2.638  41.548  -2.257  1.00  0.00
ATOM   3501  H2  WAT   653       2.066  40.418  -1.441  1.00  0.00
ATOM   3502  O   WAT   654      25.211  14.506  37.357  1.00  0.00
ATOM   3503  H1  WAT   654      25.288  15.403  36.963  1.00  0.00
ATOM   3504  H2  WAT   654      25.203  14.731  38.310  1.00  0.00
ATOM   3505  O   WAT   655     -22.509   8.406  14.243  1.00  0.00
ATOM   3506  H1  WAT   655     -23.439   8.317  13.986  1.00  0.00
ATOM   3507  H2  WAT   655     -22.249   7.478  14.379  1.00  0.00
ATOM   3508  O   WAT   656      35.134  16.827  33.130  1.00  0.00
ATOM   3509  H1  WAT   656      35.949  16.672  32.615  1.00  0.00
ATOM   3510  H2  WAT   656      34.456  16.688  32.436  1.00  0.00
ATOM   3511  O   WAT   657      35.105  15.829 -24.413  1.00  0.00
ATOM   3512  H1  WAT   657      36.073  15.789 -24.545  1.00  0.00
ATOM   3513  H2  WAT   657      34.902  16.712 -24.759  1.00  0.00
ATOM   3514  O   WAT   658      16.860 -10.386 -16.244  1.00  0.00
ATOM   3515  H1  WAT   658      17.055  -9.607 -15.672  1.00  0.00
ATOM   3516  H2  WAT   658      16.564  -9.907 -17.056  1.00  0.00
ATOM   3517  O   WAT   659      20.307   5.141  17.823  1.00  0.00
ATOM   3518  H1  WAT   659      19.515   4.660  18.173  1.00  0.00
ATOM   3519  H2  WAT   659      20.239   5.955  18.380  1.00  0.00
ATOM   3520  O   WAT   660      12.442  -1.455   0.299  1.00  0.00
ATOM   3521  H1  WAT   660      11.826  -1.933  -0.303  1.00  0.00
ATOM   3522  H2  WAT   660      11.836  -1.192   1.008  1.00  0.00
ATOM   3523  O   WAT   661      22.507  30.589  20.914  1.00  0.00
ATOM   3524  H1  WAT   661      22.552  30.424  19.949  1.00  0.00
ATOM   3525  H2  WAT   661      23.174  31.314  20.978  1.00  0.00
ATOM   3526  O   WAT   662      30.334  31.696  14.311  1.00  0.00
ATOM   3527  H1  WAT   662      29.727  31.059  13.862  1.00  0.00
ATOM   3528  H2  WAT   662      31.107  31.630  13.714  1.00  0.00
ATOM   3529  O   WAT   663      38.427   4.917  -7.710  1.00  0.00
ATOM   3530  H1  WAT   663      38.061   4.192  -8.268  1.00  0.00
ATOM   3531  H2  WAT   663      37.593   5.409  -7.526  1.00  0.00
ATOM   3532  O   WAT   664      29.148 -15.817  11.577  1.00  0.00
ATOM   3533  H1  WAT   664      29.779 -16.153  12.265  1.00  0.00
ATOM   3534  H2  WAT   664      29.770 -15.346  10.998  1.00  0.00
ATOM   3535  O   WAT   665      37.824  25.894  -2.233  1.00  0.00
ATOM   3536  H1  WAT   665      38.029  25.278  -2.962  1.00  0.00
ATOM   3537  H2  WAT   665      37.390  26.618  -2.743  1.00  0.00
ATOM   3538  O   WAT   666      12.348   9.228  10.753  1.00  0.00
ATOM   3539  H1  WAT   666      12.473  10.169  11.027  1.00  0.00
ATOM   3540  H2  WAT   666      12.939   8.794  11.418  1.00  0.00
ATOM   3541  O   WAT   667      16.527  17.360  24.630  1.00  0.00
ATOM   3542  H1  WAT   667      16.845  16.806  23.882  1.00  0.00
ATOM   3543  H2  WAT   667      16.001  16.669  25.116  1.00  0.00
ATOM   3544  O   WAT   668      12.665 -19.982  22.485  1.00  0.00
ATOM   3545  H1  WAT   668      12.104 -19.684  23.223  1.00  0.00
ATOM   3546  H2  WAT   668      13.338 -20.506  22.988  1.00  0.00
ATOM   3547  O   WAT   669      25.983  12.663   1.379  1.00  0.00
ATOM   3548  H1  WAT   669      25.322  12.308   0.755  1.00  0.00
ATOM   3549  H2  WAT   669      26.351  13.395   0.849  1.00  0.00
ATOM   3550  O   WAT   670      20.689  13.478   2.801  1.00  0.00
ATOM   3551  H1  WAT   670      20.477  14.331   3.221  1.00  0.00
ATOM   3552  H2  WAT   670      20.057  13.486   2.050  1.00  0.00
ATOM   3553  O   WAT   671      18.331  -3.569  13.185  1.00  0.00
ATOM   3554  H1  WAT   671      18.416  -3.372  12.227  1.00  0.00
ATOM   3555  H2  WAT   671      17.871  -4.433  13.140  1.00  0.00
ATOM   3556  O   WAT   672      12.140  -8.099  -0.993  1.00  0.00
ATOM   3557  H1  WAT   672      12.175  -7.186  -0.655  1.00  0.00
ATOM   3558  H2  WAT   672      12.789  -8.538  -0.393  1.00  0.00
ATOM   3559  O   WAT   673      17.813   1.334   0.325  1.00  0.00
ATOM   3560  H1  WAT   673      17.036   0.735   0.297  1.00  0.00
ATOM   3561  H2  WAT   673      17.374   2.190   0.182  1.00  0.00
ATOM   3562  O   WAT   674      14.910  31.462  34.590  1.00  0.00
ATOM   3563  H1  WAT   674      15.605  31.562  35.259  1.00  0.00
ATOM   3564  H2  WAT   674      14.373  32.267  34.755  1.00  0.00
ATOM   3565  O   WAT   675      17.166   6.551  24.925  1.00  0.00
ATOM   3566  H1  WAT   675      17.593   6.735  24.072  1.00  0.00
ATOM   3567  H2  WAT   675      17.226   5.571  24.950  1.00  0.00
ATOM   3568  O   WAT   676      11.000   8.505  18.460  1.00  0.00
ATOM   3569  H1  WAT   676      11.810   8.406  17.922  1.00  0.00
ATOM   3570  H2  WAT   676      11.303   8.120  19.310  1.00  0.00
ATOM   3571  O   WAT   677      -9.942 -13.066 -16.206  1.00  0.00
ATOM   3572  H1  WAT   677     -10.716 -12.973 -15.624  1.00  0.00
ATOM   3573  H2  WAT   677      -9.245 -12.630 -15.664  1.00  0.00
ATOM   3574  O   WAT   678      12.826  -6.528 -18.659  1.00  0.00
ATOM   3575  H1  WAT   678      13.066  -5.675 -18.260  1.00  0.00
ATOM   3576  H2  WAT   678      13.229  -7.162 -18.034  1.00  0.00
ATOM   3577  O   WAT   679      30.238 -20.486  27.275  1.00  0.00
ATOM   3578  H1  WAT   679      29.447 -20.731  26.760  1.00  0.00
ATOM   3579  H2  WAT   679      29.855 -20.442  28.179  1.00  0.00
ATOM   3580  O   WAT   680      11.830  -6.113   4.411  1.00  0.00
ATOM   3581  H1  WAT   680      11.436  -6.003   5.312  1.00  0.00
ATOM   3582  H2  WAT   680      12.626  -6.638   4.663  1.00  0.00
ATOM   3583  O   WAT   681      26.640  18.904  -8.292  1.00  0.00
ATOM   3584  H1  WAT   681      26.886  17.947  -8.196  1.00  0.00
ATOM   3585  H2  WAT   681      26.319  18.888  -9.220  1.00  0.00
ATOM   3586  O   WAT   682      16.632  -9.126   4.153  1.00  0.00
ATOM   3587  H1  WAT   682      16.159  -9.537   4.909  1.00  0.00
ATOM   3588  H2  WAT   682      15.912  -9.194   3.472  1.00  0.00
ATOM   3589  O   WAT   683      20.999  28.211  22.005  1.00  0.00
ATOM   3590  H1  WAT   683      21.543  27.591  21.465  1.00  0.00
ATOM   3591  H2  WAT   683      21.214  29.054  21.559  1.00  0.00
ATOM   3592  O   WAT   684      10.382  26.883  23.441  1.00  0.00
ATOM   3593  H1  WAT   684      11.124  27.528  23.492  1.00  0.00
ATOM   3594  H2  WAT   684      10.163  26.978  22.485  1.00  0.00
ATOM   3595  O   WAT   685      28.933  -6.269  10.061  1.00  0.00
ATOM   3596  H1  WAT   685      29.203  -7.048  10.589  1.00  0.00
ATOM   3597  H2  WAT   685      28.701  -5.643  10.777  1.00  0.00
ATOM   3598  O   WAT   686      13.724   5.719  20.413  1.00  0.00
ATOM   3599  H1  WAT   686      13.067   6.387  20.690  1.00  0.00
ATOM   3600  H2  WAT   686      14.379   6.279  19.950  1.00  0.00
ATOM   3601  O   WAT   687      22.816  -9.983  18.736  1.00  0.00
ATOM   3602  H1  WAT   687      23.058  -9.068  19.040  1.00  0.00
ATOM   3603  H2  WAT   687      22.246 -10.241  19.502  1.00  0.00
ATOM   3604  O   WAT   688      22.824  -5.699   7.779  1.00  0.00
ATOM   3605  H1  WAT   688      22.616  -5.050   7.041  1.00  0.00
ATOM   3606  H2  WAT   688      23.493  -6.236   7.279  1.00  0.00
ATOM   3607  O   WAT   689      32.802  28.092 -24.629  1.00  0.00
ATOM   3608  H1  WAT   689      32.455  28.472 -23.782  1.00  0.00
ATOM   3609  H2  WAT   689      32.616  28.854 -25.223  1.00  0.00
ATOM   3610  O   WAT   690      20.403  -5.672   8.999  1.00  0.00
ATOM   3611  H1  WAT   690      20.699  -5.503   9.934  1.00  0.00
ATOM   3612  H2  WAT   690      21.304  -5.548   8.573  1.00  0.00
ATOM   3613  O   WAT   691      15.741  14.454  18.076  1.00  0.00
ATOM   3614  H1  WAT   691      15.396  13.740  18.647  1.00  0.00
ATOM   3615  H2  WAT   691      15.336  15.235  18.517  1.00  0.00
ATOM   3616  O   WAT   692      -3.105 -10.651 -10.399  1.00  0.00
ATOM   3617  H1  WAT   692      -2.660  -9.899  -9.957  1.00  0.00
ATOM   3618  H2  WAT   692      -4.005 -10.260 -10.519  1.00  0.00
ATOM   3619  O   WAT   693     -26.576   8.447  23.227  1.00  0.00
ATOM   3620  H1  WAT   693     -26.766   8.116  24.145  1.00  0.00
ATOM   3621  H2  WAT   693     -27.484   8.343  22.852  1.00  0.00
ATOM   3622  O   WAT   694       9.446  17.895  -6.567  1.00  0.00
ATOM   3623  H1  WAT   694       9.355  16.945  -6.333  1.00  0.00
ATOM   3624  H2  WAT   694       9.394  18.296  -5.676  1.00  0.00
ATOM   3625  O   WAT   695      30.744  14.848  21.185  1.00  0.00
ATOM   3626  H1  WAT   695      30.406  13.952  20.998  1.00  0.00
ATOM   3627  H2  WAT   695      31.526  14.883  20.610  1.00  0.00
ATOM   3628  O   WAT   696      20.602  15.971   8.729  1.00  0.00
ATOM   3629  H1  WAT   696      20.922  16.810   8.313  1.00  0.00
ATOM   3630  H2  WAT   696      19.721  15.907   8.293  1.00  0.00
ATOM   3631  O   WAT   697      17.427  14.790   2.546  1.00  0.00
ATOM   3632  H1  WAT   697      17.923  14.365   1.797  1.00  0.00
ATOM   3633  H2  WAT   697      17.770  15.712   2.425  1.00  0.00
ATOM   3634  O   WAT   698     -15.420  -1.474   2.508  1.00  0.00
ATOM   3635  H1  WAT   698     -15.823  -1.681   3.395  1.00  0.00
ATOM   3636  H2  WAT   698     -14.631  -2.065   2.561  1.00  0.00
ATOM   3637  O   WAT   699      26.753  -3.937   4.858  1.00  0.00
ATOM   3638  H1  WAT   699      27.677  -3.629   4.740  1.00  0.00
ATOM   3639  H2  WAT   699      26.494  -4.000   3.902  1.00  0.00
ATOM   3640  O   WAT   700     -23.352  16.174  18.684  1.00  0.00
ATOM   3641  H1  WAT   700     -23.395  17.025  18.174  1.00  0.00
ATOM   3642  H2  WAT   700     -22.382  16.075  18.750  1.00  0.00
ATOM   3643  O   WAT   701      29.575  16.047  11.564  1.00  0.00
ATOM   3644  H1  WAT   701      29.486  15.308  12.215  1.00  0.00
ATOM   3645  H2  WAT   701      30.143  16.649  12.115  1.00  0.00
ATOM   3646  O   WAT   702      34.631  33.193 -11.531  1.00  0.00
ATOM   3647  H1  WAT   702      35.592  33.181 -11.267  1.00  0.00
ATOM   3648  H2  WAT   702      34.358  33.966 -10.966  1.00  0.00
ATOM   3649  O   WAT   703      24.742  38.964   4.309  1.00  0.00
ATOM   3650  H1  WAT   703      24.309  39.553   4.985  1.00  0.00
ATOM   3651  H2  WAT   703      24.847  38.161   4.887  1.00  0.00
ATOM   3652  O   WAT   704      33.170  21.913 -15.917  1.00  0.00
ATOM   3653  H1  WAT   704      33.889  22.556 -16.041  1.00  0.00
ATOM   3654  H2  WAT   704      32.882  22.115 -15.004  1.00  0.00
ATOM   3655  O   WAT   705      14.666  -1.561 -20.699  1.00  0.00
ATOM   3656  H1  WAT   705      15.266  -1.997 -20.065  1.00  0.00
ATOM   3657  H2  WAT   705      14.430  -0.755 -20.203  1.00  0.00
ATOM   3658  O   WAT   706      23.183  36.077  39.819  1.00  0.00
ATOM   3659  H1  WAT   706      23.480  35.350  40.394  1.00  0.00
ATOM   3660  H2  WAT   706      22.564  35.604  39.230  1.00  0.00
ATOM   3661  O   WAT   707       3.084  -2.029  28.968  1.00  0.00
ATOM   3662  H1  WAT   707       4.031  -2.219  29.107  1.00  0.00
ATOM   3663  H2  WAT   707       2.664  -2.642  29.597  1.00  0.00
ATOM   3664  O   WAT   708       1.550  23.081  13.026  1.00  0.00
ATOM   3665  H1  WAT   708       2.014  23.565  12.300  1.00  0.00
ATOM   3666  H2  WAT   708       1.758  22.157  12.755  1.00  0.00
ATOM   3667  O   WAT   709      34.050  17.116  17.724  1.00  0.00
ATOM   3668  H1  WAT   709      33.608  17.938  18.061  1.00  0.00
ATOM   3669  H2  WAT   709      34.286  17.460  16.815  1.00  0.00
ATOM   3670  O   WAT   710     -26.636  33.367 -15.318  1.00  0.00
ATOM   3671  H1  WAT   710     -26.666  33.364 -14.330  1.00  0.00
ATOM   3672  H2  WAT   710     -26.877  34.294 -15.499  1.00  0.00
ATOM   3673  O   WAT   711      38.423  12.609   4.534  1.00  0.00
ATOM   3674  H1  WAT   711      38.281  12.755   3.573  1.00  0.00
ATOM   3675  H2  WAT   711      39.405  12.596   4.556  1.00  0.00
ATOM   3676  O   WAT   712      37.177  19.070 -11.636  1.00  0.00
ATOM   3677  H1  WAT   712      37.328  19.666 -10.868  1.00  0.00
ATOM   3678  H2  WAT   712      38.013  18.549 -11.600  1.00  0.00
ATOM   3679  O   WAT   713      34.554  37.947 -19.111  1.00  0.00
ATOM   3680  H1  WAT   713      33.805  37.887 -18.471  1.00  0.00
ATOM   3681  H2  WAT   713      34.088  37.632 -19.921  1.00  0.00
ATOM   3682  O   WAT   714     -29.710   2.497  39.591  1.00  0.00
ATOM   3683  H1  WAT   714     -30.527   2.017  39.838  1.00  0.00
ATOM   3684  H2  WAT   714     -29.726   3.197  40.297  1.00  0.00
ATOM   3685  O   WAT   715      20.000   3.497  14.550  1.00  0.00
ATOM   3686  H1  WAT   715      20.668   2.806  14.311  1.00  0.00
ATOM   3687  H2  WAT   715      19.529   3.006  15.263  1.00  0.00
ATOM   3688  O   WAT   716       6.724  -5.640 -11.890  1.00  0.00
ATOM   3689  H1  WAT   716       6.068  -5.229 -12.487  1.00  0.00
ATOM   3690  H2  WAT   716       7.024  -6.389 -12.451  1.00  0.00
ATOM   3691  O   WAT   717      36.570  41.158   5.338  1.00  0.00
ATOM   3692  H1  WAT   717      36.443  41.332   4.389  1.00  0.00
ATOM   3693  H2  WAT   717      35.983  41.842   5.727  1.00  0.00
ATOM   3694  O   WAT   718      20.322 -13.367  29.544  1.00  0.00
ATOM   3695  H1  WAT   718      20.276 -12.747  28.764  1.00  0.00
ATOM   3696  H2  WAT   718      20.832 -12.763  30.152  1.00  0.00
ATOM   3697  O   WAT   719     -11.273  34.953   5.158  1.00  0.00
ATOM   3698  H1  WAT   719     -11.344  34.057   5.543  1.00  0.00
ATOM   3699  H2  WAT   719     -12.018  35.404   5.603  1.00  0.00
ATOM   3700  O   WAT   720      24.081  30.522   0.273  1.00  0.00
ATOM   3701  H1  WAT   720      23.913  30.682  -0.674  1.00  0.00
ATOM   3702  H2  WAT   720      24.959  30.947   0.371  1.00  0.00
ATOM   3703  O   WAT   721      16.246  -6.446   4.331  1.00  0.00
ATOM   3704  H1  WAT   721      16.643  -7.341   4.242  1.00  0.00
ATOM   3705  H2  WAT   721      16.862  -5.929   3.769  1.00  0.00
ATOM   3706  O   WAT   722      25.661  27.915  35.233  1.00  0.00
ATOM   3707  H1  WAT   722      26.385  28.052  34.603  1.00  0.00
ATOM   3708  H2  WAT   722      25.205  27.142  34.859  1.00  0.00
ATOM   3709  O   WAT   723      18.204  28.277  -7.532  1.00  0.00
ATOM   3710  H1  WAT   723      17.264  27.982  -7.488  1.00  0.00
ATOM   3711  H2  WAT   723      18.099  29.197  -7.194  1.00  0.00
ATOM   3712  O   WAT   724      11.661  19.981  24.807  1.00  0.00
ATOM   3713  H1  WAT   724      11.909  19.220  24.253  1.00  0.00
ATOM   3714  H2  WAT   724      10.678  19.981  24.657  1.00  0.00
ATOM   3715  O   WAT   725      30.877   2.791   3.523  1.00  0.00
ATOM   3716  H1  WAT   725      30.245   2.806   4.261  1.00  0.00
ATOM   3717  H2  WAT   725      31.152   1.848   3.529  1.00  0.00
ATOM   3718  O   WAT   726      26.383  10.821  -9.533  1.00  0.00
ATOM   3719  H1  WAT   726      25.639  11.098  -8.959  1.00  0.00
ATOM   3720  H2  WAT   726      26.284  11.488 -10.256  1.00  0.00
ATOM   3721  O   WAT   727      16.836   4.638  -6.509  1.00  0.00
ATOM   3722  H1  WAT   727      16.168   5.032  -7.115  1.00  0.00
ATOM   3723  H2  WAT   727      16.379   4.724  -5.654  1.00  0.00
ATOM   3724  O   WAT   728      25.440  32.132  -2.938  1.00  0.00
ATOM   3725  H1  WAT   728      24.577  32.474  -2.613  1.00  0.00
ATOM   3726  H2  WAT   728      25.338  31.179  -2.715  1.00  0.00
ATOM   3727  O   WAT   729     -20.723  11.490  19.937  1.00  0.00
ATOM   3728  H1  WAT   729     -20.392  12.406  20.032  1.00  0.00
ATOM   3729  H2  WAT   729     -21.545  11.664  19.403  1.00  0.00
ATOM   3730  O   WAT   730      36.441  22.567  38.328  1.00  0.00
ATOM   3731  H1  WAT   730      36.242  23.087  39.144  1.00  0.00
ATOM   3732  H2  WAT   730      36.034  21.712  38.599  1.00  0.00
ATOM   3733  O   WAT   731      34.027 -16.623  16.647  1.00  0.00
ATOM   3734  H1  WAT   731      34.488 -16.527  17.517  1.00  0.00
ATOM   3735  H2  WAT   731      33.521 -15.794  16.631  1.00  0.00
ATOM   3736  O   WAT   732     -21.278  25.858 -12.122  1.00  0.00
ATOM   3737  H1  WAT   732     -22.020  25.977 -12.758  1.00  0.00
ATOM   3738  H2  WAT   732     -21.763  25.426 -11.382  1.00  0.00
ATOM   3739  O   WAT   733      38.851  -4.466  19.288  1.00  0.00
ATOM   3740  H1  WAT   733      39.400  -3.667  19.105  1.00  0.00
ATOM   3741  H2  WAT   733      38.701  -4.764  18.358  1.00  0.00
ATOM   3742  O   WAT   734      20.519   5.411  22.731  1.00  0.00
ATOM   3743  H1  WAT   734      21.090   6.102  22.300  1.00  0.00
ATOM   3744  H2  WAT   734      20.897   5.431  23.632  1.00  0.00
ATOM   3745  O   WAT   735      37.251  19.098  14.969  1.00  0.00
ATOM   3746  H1  WAT   735      37.901  18.442  15.356  1.00  0.00
ATOM   3747  H2  WAT   735      37.470  18.933  14.011  1.00  0.00
ATOM   3748  O   WAT   736     -21.252   0.425  26.900  1.00  0.00
ATOM   3749  H1  WAT   736     -21.377   0.918  27.747  1.00  0.00
ATOM   3750  H2  WAT   736     -21.837  -0.347  27.092  1.00  0.00
ATOM   3751  O   WAT   737      12.198 -16.041  -5.804  1.00  0.00
ATOM   3752  H1  WAT   737      11.763 -16.735  -5.285  1.00  0.00
ATOM   3753  H2  WAT   737      12.629 -16.557  -6.503  1.00  0.00
ATOM   3754  O   WAT   738      12.520  20.657   4.246  1.00  0.00
ATOM   3755  H1  WAT   738      13.229  21.135   3.763  1.00  0.00
ATOM   3756  H2  WAT   738      12.024  21.435   4.601  1.00  0.00
ATOM   3757  O   WAT   739     -24.876 -10.942  29.848  1.00  0.00
ATOM   3758  H1  WAT   739     -25.181 -11.873  29.957  1.00  0.00
ATOM   3759  H2  WAT   739     -24.638 -10.985  28.882  1.00  0.00
ATOM   3760  O   WAT   740      29.461  30.188  -7.211  1.00  0.00
ATOM   3761  H1  WAT   740      28.519  30.098  -6.951  1.00  0.00
ATOM   3762  H2  WAT   740      29.812  30.660  -6.431  1.00  0.00
ATOM   3763  O   WAT   741      11.328  39.403  26.793  1.00  0.00
ATOM   3764  H1  WAT   741      10.371  39.282  26.904  1.00  0.00
ATOM   3765  H2  WAT   741      11.376  40.392  26.756  1.00  0.00
ATOM   3766  O   WAT   742     -24.975   5.778 -21.819  1.00  0.00
ATOM   3767  H1  WAT   742     -25.172   4.981 -21.288  1.00  0.00
ATOM   3768  H2  WAT   742     -25.572   5.607 -22.593  1.00  0.00
ATOM   3769  O   WAT   743      22.330  -3.520  -1.726  1.00  0.00
ATOM   3770  H1  WAT   743      22.646  -3.508  -2.662  1.00  0.00
ATOM   3771  H2  WAT   743      22.700  -2.646  -1.437  1.00  0.00
ATOM   3772  O   WAT   744       6.766  11.686  -7.480  1.00  0.00
ATOM   3773  H1  WAT   744       7.660  11.472  -7.801  1.00  0.00
ATOM   3774  H2  WAT   744       6.270  11.717  -8.325  1.00  0.00
ATOM   3775  O   WAT   745      31.188 -18.768 -22.388  1.00  0.00
ATOM   3776  H1  WAT   745      31.215 -19.651 -22.800  1.00  0.00
ATOM   3777  H2  WAT   745      30.348 -18.832 -21.883  1.00  0.00
ATOM   3778  O   WAT   746      27.562   2.692  12.597  1.00  0.00
ATOM   3779  H1  WAT   746      27.042   2.857  11.789  1.00  0.00
ATOM   3780  H2  WAT   746      27.277   3.440  13.163  1.00  0.00
ATOM   3781  O   WAT   747      26.736  34.147   6.032  1.00  0.00
ATOM   3782  H1  WAT   747      27.720  34.027   6.022  1.00  0.00
ATOM   3783  H2  WAT   747      26.477  33.348   6.521  1.00  0.00
ATOM   3784  O   WAT   748      19.267  38.299   9.331  1.00  0.00
ATOM   3785  H1  WAT   748      19.188  38.552  10.265  1.00  0.00
ATOM   3786  H2  WAT   748      18.341  38.166   9.074  1.00  0.00
ATOM   3787  O   WAT   749      20.415   9.697  28.598  1.00  0.00
ATOM   3788  H1  WAT   749      20.869   8.888  28.965  1.00  0.00
ATOM   3789  H2  WAT   749      19.527   9.323  28.447  1.00  0.00
ATOM   3790  O   WAT   750      17.394  30.667   4.356  1.00  0.00
ATOM   3791  H1  WAT   750      18.262  30.721   3.901  1.00  0.00
ATOM   3792  H2  WAT   750      16.787  30.801   3.594  1.00  0.00
ATOM   3793  O   WAT   751      25.119  23.935  22.098  1.00  0.00
ATOM   3794  H1  WAT   751      24.305  23.418  21.935  1.00  0.00
ATOM   3795  H2  WAT   751      25.456  23.460  22.900  1.00  0.00
ATOM   3796  O   WAT   752      19.737  11.473   7.977  1.00  0.00
ATOM   3797  H1  WAT   752      20.210  10.641   7.751  1.00  0.00
ATOM   3798  H2  WAT   752      19.533  11.795   7.078  1.00  0.00
ATOM   3799  O   WAT   753      39.889  13.392  13.692  1.00  0.00
ATOM   3800  H1  WAT   753      40.635  13.843  14.140  1.00  0.00
ATOM   3801  H2  WAT   753      40.332  12.546  13.429  1.00  0.00
ATOM   3802  O   WAT   754      21.600   7.263  -2.910  1.00  0.00
ATOM   3803  H1  WAT   754      21.543   6.319  -2.685  1.00  0.00
ATOM   3804  H2  WAT   754      21.156   7.678  -2.148  1.00  0.00
ATOM   3805  O   WAT   755     -25.161  19.685  22.312  1.00  0.00
ATOM   3806  H1  WAT   755     -24.871  18.765  22.118  1.00  0.00
ATOM   3807  H2  WAT   755     -24.326  20.164  22.079  1.00  0.00
ATOM   3808  O   WAT   756      19.437  19.279  16.905  1.00  0.00
ATOM   3809  H1  WAT   756      19.980  18.472  16.992  1.00  0.00
ATOM   3810  H2  WAT   756      18.545  18.890  16.801  1.00  0.00
ATOM   3811  O   WAT   757     -14.962   4.706  29.102  1.00  0.00
ATOM   3812  H1  WAT   757     -14.952   4.563  28.123  1.00  0.00
ATOM   3813  H2  WAT   757     -14.289   5.413  29.169  1.00  0.00
ATOM   3814  O   WAT   758      37.952  15.493  19.410  1.00  0.00
ATOM   3815  H1  WAT   758      38.710  14.862  19.301  1.00  0.00
ATOM   3816  H2  WAT   758      37.744  15.309  20.354  1.00  0.00
ATOM   3817  O   WAT   759      19.046  30.024  21.980  1.00  0.00
ATOM   3818  H1  WAT   759      19.504  29.169  22.107  1.00  0.00
ATOM   3819  H2  WAT   759      19.099  30.134  21.019  1.00  0.00
ATOM   3820  O   WAT   760      22.236 -19.197  40.529  1.00  0.00
ATOM   3821  H1  WAT   760      22.501 -20.112  40.251  1.00  0.00
ATOM   3822  H2  WAT   760      23.088 -18.911  40.929  1.00  0.00
ATOM   3823  O   WAT   761     -20.099  -7.295   5.024  1.00  0.00
ATOM   3824  H1  WAT   761     -19.783  -7.399   5.948  1.00  0.00
ATOM   3825  H2  WAT   761     -19.367  -6.753   4.659  1.00  0.00
ATOM   3826  O   WAT   762      19.086  14.181  31.582  1.00  0.00
ATOM   3827  H1  WAT   762      19.074  14.011  30.598  1.00  0.00
ATOM   3828  H2  WAT   762      19.081  15.169  31.546  1.00  0.00
ATOM   3829  O   WAT   763     -28.432  39.513  27.605  1.00  0.00
ATOM   3830  H1  WAT   763     -29.124  39.946  28.144  1.00  0.00
ATOM   3831  H2  WAT   763     -27.827  40.286  27.473  1.00  0.00
ATOM   3832  O   WAT   764      19.416   5.351  -6.708  1.00  0.00
ATOM   3833  H1  WAT   764      18.433   5.318  -6.756  1.00  0.00
ATOM   3834  H2  WAT   764      19.572   4.554  -6.150  1.00  0.00
ATOM   3835  O   WAT   765      13.913 -13.859   0.762  1.00  0.00
ATOM   3836  H1  WAT   765      13.145 -13.853   1.353  1.00  0.00
ATOM   3837  H2  WAT   765      14.210 -14.788   0.840  1.00  0.00
ATOM   3838  O   WAT   766      25.045 -13.161  -3.486  1.00  0.00
ATOM   3839  H1  WAT   766      25.877 -12.699  -3.222  1.00  0.00
ATOM   3840  H2  WAT   766      24.945 -12.781  -4.394  1.00  0.00
ATOM   3841  O   WAT   767      40.477 -19.092  24.611  1.00  0.00
ATOM   3842  H1  WAT   767      40.646 -19.916  25.101  1.00  0.00
ATOM   3843  H2  WAT   767      39.506 -19.013  24.737  1.00  0.00
ATOM   3844  O   WAT   768      26.242  13.478  -3.911  1.00  0.00
ATOM   3845  H1  WAT   768      25.846  12.650  -3.549  1.00  0.00
ATOM   3846  H2  WAT   768      27.029  13.080  -4.359  1.00  0.00
ATOM   3847  O   WAT   769      24.554  20.256   9.148  1.00  0.00
ATOM   3848  H1  WAT   769      25.292  20.759   9.525  1.00  0.00
ATOM   3849  H2  WAT   769      24.530  20.625   8.233  1.00  0.00
ATOM   3850  O   WAT   770      17.799 -15.320  22.359  1.00  0.00
ATOM   3851  H1  WAT   770      17.242 -14.564  22.662  1.00  0.00
ATOM   3852  H2  WAT   770      18.330 -15.463  23.176  1.00  0.00
ATOM   3853  O   WAT   771      27.608  17.735  15.883  1.00  0.00
ATOM   3854  H1  WAT   771      26.903  17.402  15.308  1.00  0.00
ATOM   3855  H2  WAT   771      27.241  17.524  16.770  1.00  0.00
ATOM   3856  O   WAT   772      19.430 -19.906  27.967  1.00  0.00
ATOM   3857  H1  WAT   772      20.229 -20.440  28.151  1.00  0.00
ATOM   3858  H2  WAT   772      19.698 -19.058  28.401  1.00  0.00
ATOM   3859  O   WAT   773      23.448  16.877  15.100  1.00  0.00
ATOM   3860  H1  WAT   773      23.707  15.933  15.062  1.00  0.00
ATOM   3861  H2  WAT   773      22.884  16.931  14.295  1.00  0.00
ATOM   3862  O   WAT   774      17.301  33.264  -0.020  1.00  0.00
ATOM   3863  H1  WAT   774      16.484  32.816   0.227  1.00  0.00
ATOM   3864  H2  WAT   774      17.974  32.773   0.485  1.00  0.00
ATOM   3865  O   WAT   775      34.644  12.053 -16.961  1.00  0.00
ATOM   3866  H1  WAT   775      34.041  12.836 -17.110  1.00  0.00
ATOM   3867  H2  WAT   775      33.971  11.419 -16.632  1.00  0.00
ATOM   3868  O   WAT   776      36.428 -11.920 -10.170  1.00  0.00
ATOM   3869  H1  WAT   776      35.774 -12.269 -10.836  1.00  0.00
ATOM   3870  H2  WAT   776      36.121 -12.461  -9.399  1.00  0.00
ATOM   3871  O   WAT   777      31.027  16.772   4.331  1.00  0.00
ATOM   3872  H1  WAT   777      30.148  17.150   4.042  1.00  0.00
ATOM   3873  H2  WAT   777      30.880  15.839   4.056  1.00  0.00
ATOM   3874  O   WAT   778      19.712 -12.113 -20.702  1.00  0.00
ATOM   3875  H1  WAT   778      20.675 -11.942 -20.696  1.00  0.00
ATOM   3876  H2  WAT   778      19.402 -11.273 -20.276  1.00  0.00
ATOM   3877  O   WAT   779      17.546 -14.148 -17.982  1.00  0.00
ATOM   3878  H1  WAT   779      17.394 -14.639 -17.145  1.00  0.00
ATOM   3879  H2  WAT   779      18.416 -13.756 -17.800  1.00  0.00
ATOM   3880  O   WAT   780      36.290  10.656 -12.572  1.00  0.00
ATOM   3881  H1  WAT   780      35.906  11.547 -12.402  1.00  0.00
ATOM   3882  H2  WAT   780      35.691  10.359 -13.288  1.00  0.00
ATOM   3883  O   WAT   781      10.930   4.509 -17.573  1.00  0.00
ATOM   3884  H1  WAT   781      10.028   4.679 -17.966  1.00  0.00
ATOM   3885  H2  WAT   781      11.186   3.766 -18.180  1.00  0.00
ATOM   3886  O   WAT   782      17.980   2.448 -15.321  1.00  0.00
ATOM   3887  H1  WAT   782      17.461   1.637 -15.200  1.00  0.00
ATOM   3888  H2  WAT   782      18.617   2.167 -16.010  1.00  0.00
ATOM   3889  O   WAT   783      35.737  24.894   4.519  1.00  0.00
ATOM   3890  H1  WAT   783      35.486  24.155   5.138  1.00  0.00
ATOM   3891  H2  WAT   783      35.141  25.587   4.865  1.00  0.00
ATOM   3892  O   WAT   784      31.850  26.457 -11.881  1.00  0.00
ATOM   3893  H1  WAT   784      31.553  27.394 -11.890  1.00  0.00
ATOM   3894  H2  WAT   784      31.585  26.197 -12.793  1.00  0.00
ATOM   3895  O   WAT   785      32.844 -17.877   5.344  1.00  0.00
ATOM   3896  H1  WAT   785      32.440 -17.107   5.816  1.00  0.00
ATOM   3897  H2  WAT   785      33.671 -17.956   5.876  1.00  0.00
ATOM   3898  O   WAT   786      30.558  -4.140  23.386  1.00  0.00
ATOM   3899  H1  WAT   786      29.876  -3.536  22.997  1.00  0.00
ATOM   3900  H2  WAT   786      31.201  -4.147  22.655  1.00  0.00
ATOM   3901  O   WAT   787      -2.898   1.480 -14.231  1.00  0.00
ATOM   3902  H1  WAT   787      -3.058   0.691 -13.654  1.00  0.00
ATOM   3903  H2  WAT   787      -1.934   1.406 -14.353  1.00  0.00
ATOM   3904  O   WAT   788      14.087   9.855  15.068  1.00  0.00
ATOM   3905  H1  WAT   788      14.478  10.177  14.219  1.00  0.00
ATOM   3906  H2  WAT   788      14.458  10.575  15.656  1.00  0.00
ATOM   3907  O   WAT   789      -3.159 -17.238  -5.013  1.00  0.00
ATOM   3908  H1  WAT   789      -2.922 -17.590  -4.104  1.00  0.00
ATOM   3909  H2  WAT   789      -2.597 -16.423  -4.981  1.00  0.00
ATOM   3910  O   WAT   790      38.536   4.064  27.883  1.00  0.00
ATOM   3911  H1  WAT   790      37.968   3.266  27.745  1.00  0.00
ATOM   3912  H2  WAT   790      39.140   3.689  28.571  1.00  0.00
ATOM   3913  O   WAT   791      13.145  20.701  21.588  1.00  0.00
ATOM   3914  H1  WAT   791      13.994  20.363  21.970  1.00  0.00
ATOM   3915  H2  WAT   791      12.605  19.874  21.697  1.00  0.00
ATOM   3916  O   WAT   792      38.760  16.791  -7.402  1.00  0.00
ATOM   3917  H1  WAT   792      39.005  17.520  -8.006  1.00  0.00
ATOM   3918  H2  WAT   792      39.123  16.026  -7.898  1.00  0.00
ATOM   3919  O   WAT   793      23.116  38.938 -26.611  1.00  0.00
ATOM   3920  H1  WAT   793      22.996  38.001 -26.893  1.00  0.00
ATOM   3921  H2  WAT   793      23.005  38.830 -25.644  1.00  0.00
ATOM   3922  O   WAT   794      28.987   1.492  33.963  1.00  0.00
ATOM   3923  H1  WAT   794      28.712   0.891  33.229  1.00  0.00
ATOM   3924  H2  WAT   794      28.604   1.009  34.726  1.00  0.00
ATOM   3925  O   WAT   795      35.491  28.474  10.814  1.00  0.00
ATOM   3926  H1  WAT   795      34.912  29.274  10.779  1.00  0.00
ATOM   3927  H2  WAT   795      35.903  28.599  11.692  1.00  0.00
ATOM   3928  O   WAT   796      18.453  30.527 -15.859  1.00  0.00
ATOM   3929  H1  WAT   796      19.011  31.104 -16.398  1.00  0.00
ATOM   3930  H2  WAT   796      19.132  30.015 -15.365  1.00  0.00
ATOM   3931  O   WAT   797      36.244  11.557  -2.485  1.00  0.00
ATOM   3932  H1  WAT   797      36.131  10.794  -1.861  1.00  0.00
ATOM   3933  H2  WAT   797      35.498  12.119  -2.181  1.00  0.00
ATOM   3934  O   WAT   798      18.801  15.207  12.165  1.00  0.00
ATOM   3935  H1  WAT   798      18.458  14.322  11.974  1.00  0.00
ATOM   3936  H2  WAT   798      18.230  15.770  11.613  1.00  0.00
ATOM   3937  O   WAT   799      14.912  29.315   0.231  1.00  0.00
ATOM   3938  H1  WAT   799      15.338  28.464   0.489  1.00  0.00
ATOM   3939  H2  WAT   799      14.885  29.752   1.108  1.00  0.00
ATOM   3940  O   WAT   800      27.705  39.564   0.645  1.00  0.00
ATOM   3941  H1  WAT   800      27.777  38.615   0.352  1.00  0.00
ATOM   3942  H2  WAT   800      27.279  39.931  -0.167  1.00  0.00
ATOM   3943  O   WAT   801     -23.702 -15.194  10.124  1.00  0.00
ATOM   3944  H1  WAT   801     -24.558 -15.624  10.324  1.00  0.00
ATOM   3945  H2  WAT   801     -23.468 -15.691   9.299  1.00  0.00
ATOM   3946  O   WAT   802       9.785   6.918  38.758  1.00  0.00
ATOM   3947  H1  WAT   802      10.377   6.387  38.200  1.00  0.00
ATOM   3948  H2  WAT   802       9.310   6.200  39.242  1.00  0.00
ATOM   3949  O   WAT   803      36.983  -9.955  21.532  1.00  0.00
ATOM   3950  H1  WAT   803      36.400  -9.165  21.652  1.00  0.00
ATOM   3951  H2  WAT   803      36.654 -10.496  22.287  1.00  0.00
ATOM   3952  O   WAT   804      25.862  36.665  -4.952  1.00  0.00
ATOM   3953  H1  WAT   804      25.557  36.731  -4.042  1.00  0.00
ATOM   3954  H2  WAT   804      26.072  37.593  -5.175  1.00  0.00
ATOM   3955  O   WAT   805      24.448  37.717 -15.085  1.00  0.00
ATOM   3956  H1  WAT   805      24.461  37.804 -16.078  1.00  0.00
ATOM   3957  H2  WAT   805      23.496  37.473 -14.985  1.00  0.00
ATOM   3958  O   WAT   806      19.512   5.352 -25.378  1.00  0.00
ATOM   3959  H1  WAT   806      19.386   4.389 -25.446  1.00  0.00
ATOM   3960  H2  WAT   806      19.373   5.631 -26.297  1.00  0.00
ATOM   3961  O   WAT   807       8.462  -7.238  -1.999  1.00  0.00
ATOM   3962  H1  WAT   807       8.905  -7.136  -1.126  1.00  0.00
ATOM   3963  H2  WAT   807       8.532  -8.211  -2.111  1.00  0.00
ATOM   3964  O   WAT   808      34.496  21.877  11.735  1.00  0.00
ATOM   3965  H1  WAT   808      33.666  21.688  11.266  1.00  0.00
ATOM   3966  H2  WAT   808      34.545  22.852  11.672  1.00  0.00
ATOM   3967  O   WAT   809      37.530  12.605  -6.745  1.00  0.00
ATOM   3968  H1  WAT   809      36.875  12.115  -6.192  1.00  0.00
ATOM   3969  H2  WAT   809      36.933  12.983  -7.422  1.00  0.00
ATOM   3970  O   WAT   810      36.323  13.416  -8.975  1.00  0.00
ATOM   3971  H1  WAT   810      35.872  12.556  -8.836  1.00  0.00
ATOM   3972  H2  WAT   810      35.545  14.013  -9.057  1.00  0.00
ATOM   3973  O   WAT   811      14.379   0.300  33.366  1.00  0.00
ATOM   3974  H1  WAT   811      15.203  -0.049  32.976  1.00  0.00
ATOM   3975  H2  WAT   811      14.161   1.014  32.726  1.00  0.00
ATOM   3976  O   WAT   812      38.365  15.101   6.475  1.00  0.00
ATOM   3977  H1  WAT   812      38.415  14.134   6.340  1.00  0.00
ATOM   3978  H2  WAT   812      38.899  15.182   7.301  1.00  0.00
ATOM   3979  O   WAT   813     -15.203  11.329   9.233  1.00  0.00
ATOM   3980  H1  WAT   813     -16.175  11.391   9.026  1.00  0.00
ATOM   3981  H2  WAT   813     -15.015  12.312   9.236  1.00  0.00
ATOM   3982  O   WAT   814      32.840   2.803 -21.804  1.00  0.00
ATOM   3983  H1  WAT   814      32.623   3.757 -21.642  1.00  0.00
ATOM   3984  H2  WAT   814      33.107   2.544 -20.894  1.00  0.00
ATOM   3985  O   WAT   815       7.037  -6.891  -8.932  1.00  0.00
ATOM   3986  H1  WAT   815       6.837  -6.194  -9.593  1.00  0.00
ATOM   3987  H2  WAT   815       7.325  -7.610  -9.552  1.00  0.00
ATOM   3988  O   WAT   816      21.970  16.691  -9.445  1.00  0.00
ATOM   3989  H1  WAT   816      21.647  15.766  -9.336  1.00  0.00
ATOM   3990  H2  WAT   816      21.130  17.110  -9.743  1.00  0.00
ATOM   3991  O   WAT   817      17.685  -3.761 -12.381  1.00  0.00
ATOM   3992  H1  WAT   817      17.261  -4.631 -12.265  1.00  0.00
ATOM   3993  H2  WAT   817      18.254  -3.734 -11.576  1.00  0.00
ATOM   3994  O   WAT   818     -24.232 -13.100  11.788  1.00  0.00
ATOM   3995  H1  WAT   818     -24.023 -13.794  11.117  1.00  0.00
ATOM   3996  H2  WAT   818     -25.024 -13.509  12.202  1.00  0.00
ATOM   3997  O   WAT   819      32.677   6.156 -17.837  1.00  0.00
ATOM   3998  H1  WAT   819      32.432   5.868 -16.936  1.00  0.00
ATOM   3999  H2  WAT   819      32.202   6.996 -17.921  1.00  0.00
ATOM   4000  O   WAT   820      24.931   5.852  -7.279  1.00  0.00
ATOM   4001  H1  WAT   820      24.916   6.841  -7.250  1.00  0.00
ATOM   4002  H2  WAT   820      24.089   5.697  -7.767  1.00  0.00
ATOM   4003  O   WAT   821     -12.485  33.313  34.594  1.00  0.00
ATOM   4004  H1  WAT   821     -12.991  32.899  35.316  1.00  0.00
ATOM   4005  H2  WAT   821     -12.852  32.867  33.812  1.00  0.00
ATOM   4006  O   WAT   822      36.743  20.992 -19.866  1.00  0.00
ATOM   4007  H1  WAT   822      37.674  21.319 -19.831  1.00  0.00
ATOM   4008  H2  WAT   822      36.651  20.835 -20.821  1.00  0.00
ATOM   4009  O   WAT   823      28.770  -5.276  28.488  1.00  0.00
ATOM   4010  H1  WAT   823      28.158  -5.553  27.776  1.00  0.00
ATOM   4011  H2  WAT   823      29.598  -5.701  28.184  1.00  0.00
ATOM   4012  O   WAT   824      39.310   8.980   2.828  1.00  0.00
ATOM   4013  H1  WAT   824      38.353   9.058   3.026  1.00  0.00
ATOM   4014  H2  WAT   824      39.258   8.807   1.854  1.00  0.00
ATOM   4015  O   WAT   825     -26.420  21.041   3.343  1.00  0.00
ATOM   4016  H1  WAT   825     -27.198  21.370   2.839  1.00  0.00
ATOM   4017  H2  WAT   825     -26.855  20.419   3.951  1.00  0.00
ATOM   4018  O   WAT   826      -0.696  33.277 -21.762  1.00  0.00
ATOM   4019  H1  WAT   826      -0.654  33.277 -20.777  1.00  0.00
ATOM   4020  H2  WAT   826       0.260  33.438 -21.955  1.00  0.00
ATOM   4021  O   WAT   827      27.958  -8.352   8.312  1.00  0.00
ATOM   4022  H1  WAT   827      27.161  -8.177   8.892  1.00  0.00
ATOM   4023  H2  WAT   827      28.440  -7.505   8.512  1.00  0.00
ATOM   4024  O   WAT   828      27.889  13.873 -16.787  1.00  0.00
ATOM   4025  H1  WAT   828      28.097  14.731 -16.363  1.00  0.00
ATOM   4026  H2  WAT   828      27.284  14.188 -17.504  1.00  0.00
ATOM   4027  O   WAT   829      39.948   9.183  -2.187  1.00  0.00
ATOM   4028  H1  WAT   829      40.788   8.943  -2.638  1.00  0.00
ATOM   4029  H2  WAT   829      40.002  10.170  -2.301  1.00  0.00
ATOM   4030  O   WAT   830     -25.382  20.629  -9.187  1.00  0.00
ATOM   4031  H1  WAT   830     -25.116  20.167  -8.369  1.00  0.00
ATOM   4032  H2  WAT   830     -24.608  20.486  -9.760  1.00  0.00
ATOM   4033  O   WAT   831      19.066   8.778  16.727  1.00  0.00
ATOM   4034  H1  WAT   831      18.129   8.551  16.667  1.00  0.00
ATOM   4035  H2  WAT   831      19.228   9.215  15.874  1.00  0.00
ATOM   4036  O   WAT   832      12.356  11.469  37.229  1.00  0.00
ATOM   4037  H1  WAT   832      11.432  11.115  37.256  1.00  0.00
ATOM   4038  H2  WAT   832      12.727  11.032  38.016  1.00  0.00
ATOM   4039  O   WAT   833      19.119  -7.199  15.379  1.00  0.00
ATOM   4040  H1  WAT   833      18.385  -6.846  15.929  1.00  0.00
ATOM   4041  H2  WAT   833      18.631  -7.937  14.933  1.00  0.00
ATOM   4042  O   WAT   834     -18.012   8.621  27.625  1.00  0.00
ATOM   4043  H1  WAT   834     -17.042   8.527  27.637  1.00  0.00
ATOM   4044  H2  WAT   834     -18.251   7.991  26.921  1.00  0.00
ATOM   4045  O   WAT   835      34.375  32.247  -6.470  1.00  0.00
ATOM   4046  H1  WAT   835      33.936  31.377  -6.421  1.00  0.00
ATOM   4047  H2  WAT   835      34.783  32.291  -5.579  1.00  0.00
ATOM   4048  O   WAT   836      13.672  32.810  -9.406  1.00  0.00
ATOM   4049  H1  WAT   836      14.049  33.344  -8.698  1.00  0.00
ATOM   4050  H2  WAT   836      12.942  33.370  -9.726  1.00  0.00
ATOM   4051  O   WAT   837      19.065  12.503 -20.570  1.00  0.00
ATOM   4052  H1  WAT   837      18.253  11.985 -20.769  1.00  0.00
ATOM   4053  H2  WAT   837      19.387  12.639 -21.501  1.00  0.00
ATOM   4054  O   WAT   838      34.312 -12.874  -0.680  1.00  0.00
ATOM   4055  H1  WAT   838      34.924 -12.479  -0.016  1.00  0.00
ATOM   4056  H2  WAT   838      34.974 -13.421  -1.180  1.00  0.00
ATOM   4057  O   WAT   839      18.511  13.621   9.281  1.00  0.00
ATOM   4058  H1  WAT   839      19.182  12.995   8.910  1.00  0.00
ATOM   4059  H2  WAT   839      18.469  13.253  10.201  1.00  0.00
ATOM   4060  O   WAT   840      32.607   2.366 -11.489  1.00  0.00
ATOM   4061  H1  WAT   840      31.696   2.404 -11.851  1.00  0.00
ATOM   4062  H2  WAT   840      33.013   3.133 -11.958  1.00  0.00
ATOM   4063  O   WAT   841      26.833  21.337  -2.599  1.00  0.00
ATOM   4064  H1  WAT   841      26.072  20.804  -2.934  1.00  0.00
ATOM   4065  H2  WAT   841      27.435  20.615  -2.319  1.00  0.00
ATOM   4066  O   WAT   842      29.810  20.798  37.100  1.00  0.00
ATOM   4067  H1  WAT   842      28.962  20.912  37.587  1.00  0.00
ATOM   4068  H2  WAT   842      30.436  21.136  37.765  1.00  0.00
ATOM   4069  O   WAT   843      37.714 -14.004  11.834  1.00  0.00
ATOM   4070  H1  WAT   843      37.242 -14.600  11.212  1.00  0.00
ATOM   4071  H2  WAT   843      37.034 -13.931  12.542  1.00  0.00
ATOM   4072  O   WAT   844      13.833  17.989 -13.275  1.00  0.00
ATOM   4073  H1  WAT   844      12.916  17.723 -13.553  1.00  0.00
ATOM   4074  H2  WAT   844      13.630  18.104 -12.297  1.00  0.00
ATOM   4075  O   WAT   845       3.910   0.119  26.220  1.00  0.00
ATOM   4076  H1  WAT   845       3.763   0.324  27.172  1.00  0.00
ATOM   4077  H2  WAT   845       2.976   0.149  25.912  1.00  0.00
ATOM   4078  O   WAT   846      29.791  20.189 -19.448  1.00  0.00
ATOM   4079  H1  WAT   846      29.273  20.934 -19.830  1.00  0.00
ATOM   4080  H2  WAT   846      30.692  20.575 -19.494  1.00  0.00
ATOM   4081  O   WAT   847      16.672  37.117  37.247  1.00  0.00
ATOM   4082  H1  WAT   847      17.093  37.171  36.359  1.00  0.00
ATOM   4083  H2  WAT   847      17.468  36.915  37.791  1.00  0.00
ATOM   4084  O   WAT   848      19.234  25.276 -20.425  1.00  0.00
ATOM   4085  H1  WAT   848      19.472  26.111 -20.872  1.00  0.00
ATOM   4086  H2  WAT   848      19.904  24.670 -20.795  1.00  0.00
ATOM   4087  O   WAT   849      -2.531  18.408  -7.452  1.00  0.00
ATOM   4088  H1  WAT   849      -1.765  19.047  -7.467  1.00  0.00
ATOM   4089  H2  WAT   849      -2.402  18.040  -8.367  1.00  0.00
ATOM   4090  O   WAT   850     -23.248  11.487 -16.211  1.00  0.00
ATOM   4091  H1  WAT   850     -23.715  10.819 -16.756  1.00  0.00
ATOM   4092  H2  WAT   850     -24.013  11.827 -15.684  1.00  0.00
ATOM   4093  O   WAT   851      23.298  17.241 -11.911  1.00  0.00
ATOM   4094  H1  WAT   851      22.953  18.094 -12.285  1.00  0.00
ATOM   4095  H2  WAT   851      22.915  17.294 -11.013  1.00  0.00
ATOM   4096  O   WAT   852      19.811  20.909   0.310  1.00  0.00
ATOM   4097  H1  WAT   852      19.368  20.544  -0.488  1.00  0.00
ATOM   4098  H2  WAT   852      19.072  20.879   0.951  1.00  0.00
ATOM   4099  O   WAT   853      29.393  33.551  -8.837  1.00  0.00
ATOM   4100  H1  WAT   853      30.302  33.174  -8.830  1.00  0.00
ATOM   4101  H2  WAT   853      29.299  33.790  -7.897  1.00  0.00
ATOM   4102  O   WAT   854      24.056 -12.581  32.710  1.00  0.00
ATOM   4103  H1  WAT   854      24.755 -12.482  33.393  1.00  0.00
ATOM   4104  H2  WAT   854      23.688 -13.453  32.985  1.00  0.00
ATOM   4105  O   WAT   855      20.467  26.045  -9.135  1.00  0.00
ATOM   4106  H1  WAT   855      19.992  26.388  -8.350  1.00  0.00
ATOM   4107  H2  WAT   855      19.948  25.228  -9.300  1.00  0.00
ATOM   4108  O   WAT   856       7.236  14.251  -6.678  1.00  0.00
ATOM   4109  H1  WAT   856       7.178  13.277  -6.725  1.00  0.00
ATOM   4110  H2  WAT   856       8.140  14.378  -6.336  1.00  0.00
ATOM   4111  O   WAT   857      20.978  37.176 -12.753  1.00  0.00
ATOM   4112  H1  WAT   857      21.820  36.962 -12.262  1.00  0.00
ATOM   4113  H2  WAT   857      20.346  36.734 -12.125  1.00  0.00
ATOM   4114  O   WAT   858       9.188  18.262  40.249  1.00  0.00
ATOM   4115  H1  WAT   858       8.841  19.137  40.496  1.00  0.00
ATOM   4116  H2  WAT   858      10.094  18.473  39.978  1.00  0.00
ATOM   4117  O   WAT   859      31.264  34.366  -1.977  1.00  0.00
ATOM   4118  H1  WAT   859      31.596  33.450  -1.802  1.00  0.00
ATOM   4119  H2  WAT   859      31.718  34.821  -1.226  1.00  0.00
ATOM   4120  O   WAT   860      -0.004   1.300  39.329  1.00  0.00
ATOM   4121  H1  WAT   860       0.608   0.768  38.758  1.00  0.00
ATOM   4122  H2  WAT   860       0.666   1.704  39.930  1.00  0.00
ATOM   4123  O   WAT   861      21.316  21.348 -23.509  1.00  0.00
ATOM   4124  H1  WAT   861      21.023  21.229 -22.580  1.00  0.00
ATOM   4125  H2  WAT   861      20.979  20.480 -23.870  1.00  0.00
ATOM   4126  O   WAT   862      -0.775  27.906   2.246  1.00  0.00
ATOM   4127  H1  WAT   862      -0.340  28.612   2.766  1.00  0.00
ATOM   4128  H2  WAT   862      -0.067  27.740   1.572  1.00  0.00
ATOM   4129  O   WAT   863      20.594  23.076   4.217  1.00  0.00
ATOM   4130  H1  WAT   863      20.876  22.132   4.127  1.00  0.00
ATOM   4131  H2  WAT   863      21.275  23.382   4.858  1.00  0.00
ATOM   4132  O   WAT   864       6.735  -8.582 -20.824  1.00  0.00
ATOM   4133  H1  WAT   864       5.808  -8.341 -21.022  1.00  0.00
ATOM   4134  H2  WAT   864       6.666  -8.914 -19.918  1.00  0.00
ATOM   4135  O   WAT   865     -13.958  -2.979  26.562  1.00  0.00
ATOM   4136  H1  WAT   865     -14.243  -3.906  26.496  1.00  0.00
ATOM   4137  H2  WAT   865     -13.135  -2.984  26.042  1.00  0.00
ATOM   4138  O   WAT   866      32.590  22.528  21.971  1.00  0.00
ATOM   4139  H1  WAT   866      31.861  22.997  21.515  1.00  0.00
ATOM   4140  H2  WAT   866      33.085  22.184  21.193  1.00  0.00
ATOM   4141  O   WAT   867      21.301 -16.191  37.335  1.00  0.00
ATOM   4142  H1  WAT   867      20.601 -15.503  37.248  1.00  0.00
ATOM   4143  H2  WAT   867      22.081 -15.668  37.050  1.00  0.00
ATOM   4144  O   WAT   868      34.839  -8.821  26.767  1.00  0.00
ATOM   4145  H1  WAT   868      35.446  -9.405  27.252  1.00  0.00
ATOM   4146  H2  WAT   868      35.383  -8.595  25.986  1.00  0.00
ATOM   4147  O   WAT   869       6.451   1.870 -25.631  1.00  0.00
ATOM   4148  H1  WAT   869       6.181   2.145 -26.551  1.00  0.00
ATOM   4149  H2  WAT   869       5.605   1.400 -25.393  1.00  0.00
ATOM   4150  O   WAT   870      24.353   0.555   5.648  1.00  0.00
ATOM   4151  H1  WAT   870      25.004   0.958   5.029  1.00  0.00
ATOM   4152  H2  WAT   870      24.540  -0.391   5.497  1.00  0.00
ATOM   4153  O   WAT   871      31.788   5.030  21.013  1.00  0.00
ATOM   4154  H1  WAT   871      30.965   4.680  21.394  1.00  0.00
ATOM   4155  H2  WAT   871      32.185   4.233  20.627  1.00  0.00
ATOM   4156  O   WAT   872      27.035  11.464  16.097  1.00  0.00
ATOM   4157  H1  WAT   872      26.610  11.545  16.990  1.00  0.00
ATOM   4158  H2  WAT   872      27.047  12.430  15.869  1.00  0.00
ATOM   4159  O   WAT   873      40.284  35.150 -11.936  1.00  0.00
ATOM   4160  H1  WAT   873      40.885  35.400 -12.675  1.00  0.00
ATOM   4161  H2  WAT   873      39.862  36.017 -11.772  1.00  0.00
ATOM   4162  O   WAT   874      17.747 -10.006  36.322  1.00  0.00
ATOM   4163  H1  WAT   874      18.519  -9.465  36.095  1.00  0.00
ATOM   4164  H2  WAT   874      17.046  -9.333  36.395  1.00  0.00
ATOM   4165  O   WAT   875      20.904  29.312  -7.893  1.00  0.00
ATOM   4166  H1  WAT   875      19.975  28.992  -7.893  1.00  0.00
ATOM   4167  H2  WAT   875      21.005  29.520  -8.846  1.00  0.00
ATOM   4168  O   WAT   876      28.959  -0.080  -4.279  1.00  0.00
ATOM   4169  H1  WAT   876      29.705  -0.715  -4.352  1.00  0.00
ATOM   4170  H2  WAT   876      28.543  -0.399  -3.452  1.00  0.00
ATOM   4171  O   WAT   877      28.813   9.760 -25.110  1.00  0.00
ATOM   4172  H1  WAT   877      27.870  10.030 -25.157  1.00  0.00
ATOM   4173  H2  WAT   877      29.045   9.771 -26.064  1.00  0.00
ATOM   4174  O   WAT   878       1.170 -14.356  40.253  1.00  0.00
ATOM   4175  H1  WAT   878       1.813 -14.488  40.986  1.00  0.00
ATOM   4176  H2  WAT   878       1.282 -15.216  39.783  1.00  0.00
ATOM   4177  O   WAT   879      10.844  28.418 -15.535  1.00  0.00
ATOM   4178  H1  WAT   879      10.381  28.754 -16.346  1.00  0.00
ATOM   4179  H2  WAT   879      11.753  28.322 -15.902  1.00  0.00
ATOM   4180  O   WAT   880      29.576  13.737  -6.471  1.00  0.00
ATOM   4181  H1  WAT   880      28.908  13.417  -5.831  1.00  0.00
ATOM   4182  H2  WAT   880      30.386  13.658  -5.917  1.00  0.00
ATOM   4183  O   WAT   881       1.537  24.144  -7.077  1.00  0.00
ATOM   4184  H1  WAT   881       2.449  24.349  -7.391  1.00  0.00
ATOM   4185  H2  WAT   881       1.284  25.025  -6.724  1.00  0.00
ATOM   4186  O   WAT   882     -15.934 -15.046  15.727  1.00  0.00
ATOM   4187  H1  WAT   882     -16.304 -15.717  16.333  1.00  0.00
ATOM   4188  H2  WAT   882     -16.726 -14.521  15.516  1.00  0.00
ATOM   4189  O   WAT   883      28.135  -7.218   1.269  1.00  0.00
ATOM   4190  H1  WAT   883      28.820  -6.925   1.893  1.00  0.00
ATOM   4191  H2  WAT   883      28.584  -8.009   0.879  1.00  0.00
ATOM   4192  O   WAT   884      19.993   2.700 -10.750  1.00  0.00
ATOM   4193  H1  WAT   884      20.221   2.556 -11.689  1.00  0.00
ATOM   4194  H2  WAT   884      20.097   1.792 -10.396  1.00  0.00
ATOM   4195  O   WAT   885      12.021  14.341 -12.999  1.00  0.00
ATOM   4196  H1  WAT   885      11.573  13.662 -12.452  1.00  0.00
ATOM   4197  H2  WAT   885      12.576  13.749 -13.567  1.00  0.00
ATOM   4198  O   WAT   886      28.269  27.786  -5.481  1.00  0.00
ATOM   4199  H1  WAT   886      29.183  27.479  -5.300  1.00  0.00
ATOM   4200  H2  WAT   886      27.789  26.939  -5.270  1.00  0.00
ATOM   4201  O   WAT   887      23.790   9.619   5.757  1.00  0.00
ATOM   4202  H1  WAT   887      24.352   9.173   6.427  1.00  0.00
ATOM   4203  H2  WAT   887      24.382   9.493   4.961  1.00  0.00
ATOM   4204  O   WAT   888      18.165  -0.942  -9.763  1.00  0.00
ATOM   4205  H1  WAT   888      18.470  -0.571 -10.627  1.00  0.00
ATOM   4206  H2  WAT   888      18.592  -1.826  -9.810  1.00  0.00
ATOM   4207  O   WAT   889     -22.643  -3.694  13.546  1.00  0.00
ATOM   4208  H1  WAT   889     -22.153  -4.151  14.274  1.00  0.00
ATOM   4209  H2  WAT   889     -23.534  -3.657  13.947  1.00  0.00
ATOM   4210  O   WAT   890      24.136  14.916  -4.464  1.00  0.00
ATOM   4211  H1  WAT   890      24.987  14.398  -4.479  1.00  0.00
ATOM   4212  H2  WAT   890      24.521  15.803  -4.254  1.00  0.00
ATOM   4213  O   WAT   891      33.963  14.818  -9.239  1.00  0.00
ATOM   4214  H1  WAT   891      33.243  14.276  -9.616  1.00  0.00
ATOM   4215  H2  WAT   891      33.480  15.610  -8.947  1.00  0.00
ATOM   4216  O   WAT   892      37.890  24.400 -25.999  1.00  0.00
ATOM   4217  H1  WAT   892      37.724  25.276 -25.592  1.00  0.00
ATOM   4218  H2  WAT   892      36.977  24.044 -26.031  1.00  0.00
ATOM   4219  O   WAT   893      16.579 -16.530  -2.713  1.00  0.00
ATOM   4220  H1  WAT   893      15.843 -16.922  -2.210  1.00  0.00
ATOM   4221  H2  WAT   893      16.661 -15.655  -2.304  1.00  0.00
ATOM   4222  O   WAT   894      15.564   6.883  18.891  1.00  0.00
ATOM   4223  H1  WAT   894      15.904   6.353  18.139  1.00  0.00
ATOM   4224  H2  WAT   894      14.929   7.459  18.431  1.00  0.00
ATOM   4225  O   WAT   895      38.733  25.513  -8.092  1.00  0.00
ATOM   4226  H1  WAT   895      39.053  24.816  -7.473  1.00  0.00
ATOM   4227  H2  WAT   895      38.160  26.022  -7.466  1.00  0.00
ATOM   4228  O   WAT   896      18.434  -0.443 -12.504  1.00  0.00
ATOM   4229  H1  WAT   896      19.190  -0.257 -13.108  1.00  0.00
ATOM   4230  H2  WAT   896      17.722  -0.539 -13.173  1.00  0.00
ATOM   4231  O   WAT   897      38.220  25.869 -10.946  1.00  0.00
ATOM   4232  H1  WAT   897      37.242  25.935 -10.914  1.00  0.00
ATOM   4233  H2  WAT   897      38.439  25.924  -9.996  1.00  0.00
ATOM   4234  O   WAT   898       8.977 -19.627  27.813  1.00  0.00
ATOM   4235  H1  WAT   898       9.759 -19.032  27.783  1.00  0.00
ATOM   4236  H2  WAT   898       8.525 -19.341  26.989  1.00  0.00
ATOM   4237  O   WAT   899      22.051 -16.436  20.811  1.00  0.00
ATOM   4238  H1  WAT   899      22.238 -15.480  20.937  1.00  0.00
ATOM   4239  H2  WAT   899      21.108 -16.383  20.527  1.00  0.00
ATOM   4240  O   WAT   900      27.992  -3.515   0.321  1.00  0.00
ATOM   4241  H1  WAT   900      27.109  -3.674   0.741  1.00  0.00
ATOM   4242  H2  WAT   900      28.539  -3.589   1.143  1.00  0.00
ATOM   4243  O   WAT   901      34.228  20.232 -10.247  1.00  0.00
ATOM   4244  H1  WAT   901      33.699  20.990  -9.949  1.00  0.00
ATOM   4245  H2  WAT   901      33.571  19.508 -10.189  1.00  0.00
ATOM   4246  O   WAT   902     -12.535  -4.904  30.327  1.00  0.00
ATOM   4247  H1  WAT   902     -13.349  -4.558  29.911  1.00  0.00
ATOM   4248  H2  WAT   902     -12.749  -5.856  30.376  1.00  0.00
ATOM   4249  O   WAT   903      23.296 -13.340  28.260  1.00  0.00
ATOM   4250  H1  WAT   903      23.074 -12.531  27.746  1.00  0.00
ATOM   4251  H2  WAT   903      22.742 -13.987  27.764  1.00  0.00
ATOM   4252  O   WAT   904      16.366  -2.315 -18.235  1.00  0.00
ATOM   4253  H1  WAT   904      16.870  -1.504 -17.993  1.00  0.00
ATOM   4254  H2  WAT   904      16.861  -2.990 -17.749  1.00  0.00
ATOM   4255  O   WAT   905       4.117  16.944  -8.479  1.00  0.00
ATOM   4256  H1  WAT   905       3.200  16.707  -8.207  1.00  0.00
ATOM   4257  H2  WAT   905       4.491  16.031  -8.569  1.00  0.00
ATOM   4258  O   WAT   906      18.866  23.274  -8.689  1.00  0.00
ATOM   4259  H1  WAT   906      18.782  23.336  -9.667  1.00  0.00
ATOM   4260  H2  WAT   906      18.015  22.792  -8.504  1.00  0.00
ATOM   4261  O   WAT   907      12.303  -3.116  34.466  1.00  0.00
ATOM   4262  H1  WAT   907      12.884  -3.722  33.903  1.00  0.00
ATOM   4263  H2  WAT   907      13.002  -2.849  35.107  1.00  0.00
ATOM   4264  O   WAT   908      40.676   3.142   3.559  1.00  0.00
ATOM   4265  H1  WAT   908      39.877   3.708   3.426  1.00  0.00
ATOM   4266  H2  WAT   908      40.238   2.346   3.945  1.00  0.00
ATOM   4267  O   WAT   909      11.382 -10.592 -14.853  1.00  0.00
ATOM   4268  H1  WAT   909      10.602 -11.164 -14.739  1.00  0.00
ATOM   4269  H2  WAT   909      12.112 -11.185 -14.657  1.00  0.00
ATOM   4270  O   WAT   910      11.454  16.802 -13.953  1.00  0.00
ATOM   4271  H1  WAT   910      10.475  16.863 -13.838  1.00  0.00
ATOM   4272  H2  WAT   910      11.590  15.882 -13.611  1.00  0.00
ATOM   4273  O   WAT   911      23.498   0.240 -21.428  1.00  0.00
ATOM   4274  H1  WAT   911      23.972   1.097 -21.545  1.00  0.00
ATOM   4275  H2  WAT   911      24.194  -0.359 -21.808  1.00  0.00
ATOM   4276  O   WAT   912      10.799   3.495  37.666  1.00  0.00
ATOM   4277  H1  WAT   912      11.311   2.648  37.634  1.00  0.00
ATOM   4278  H2  WAT   912       9.966   3.166  38.064  1.00  0.00
ATOM   4279  O   WAT   913       8.448   5.179 -14.823  1.00  0.00
ATOM   4280  H1  WAT   913       7.903   5.439 -15.598  1.00  0.00
ATOM   4281  H2  WAT   913       8.381   4.194 -14.917  1.00  0.00
ATOM   4282  O   WAT   914      12.244  -7.666  27.056  1.00  0.00
ATOM   4283  H1  WAT   914      12.916  -7.475  27.745  1.00  0.00
ATOM   4284  H2  WAT   914      11.493  -7.135  27.377  1.00  0.00
ATOM   4285  O   WAT   915     -11.848   5.984  39.156  1.00  0.00
ATOM   4286  H1  WAT   915     -11.027   6.039  39.691  1.00  0.00
ATOM   4287  H2  WAT   915     -12.342   5.315  39.689  1.00  0.00
ATOM   4288  O   WAT   916       0.638  15.254 -25.101  1.00  0.00
ATOM   4289  H1  WAT   916       0.962  14.937 -25.986  1.00  0.00
ATOM   4290  H2  WAT   916       1.500  15.460 -24.682  1.00  0.00
ATOM   4291  O   WAT   917     -28.305   2.569 -16.651  1.00  0.00
ATOM   4292  H1  WAT   917     -27.594   3.127 -17.049  1.00  0.00
ATOM   4293  H2  WAT   917     -28.590   2.076 -17.454  1.00  0.00
ATOM   4294  O   WAT   918       3.781 -16.087  16.544  1.00  0.00
ATOM   4295  H1  WAT   918       4.563 -16.536  16.137  1.00  0.00
ATOM   4296  H2  WAT   918       3.108 -16.786  16.422  1.00  0.00
ATOM   4297  O   WAT   919      16.118   3.483  33.355  1.00  0.00
ATOM   4298  H1  WAT   919      15.289   3.240  33.789  1.00  0.00
ATOM   4299  H2  WAT   919      15.904   4.398  33.047  1.00  0.00
ATOM   4300  O   WAT   920      16.826   3.709  25.248  1.00  0.00
ATOM   4301  H1  WAT   920      16.846   3.107  24.475  1.00  0.00
ATOM   4302  H2  WAT   920      16.161   3.229  25.805  1.00  0.00
ATOM   4303  O   WAT   921      14.727  -0.358 -15.424  1.00  0.00
ATOM   4304  H1  WAT   921      13.911  -0.134 -15.954  1.00  0.00
ATOM   4305  H2  WAT   921      14.584  -1.332 -15.357  1.00  0.00
ATOM   4306  O   WAT   922      25.016  29.311  16.985  1.00  0.00
ATOM   4307  H1  WAT   922      25.337  28.421  17.270  1.00  0.00
ATOM   4308  H2  WAT   922      24.534  29.053  16.163  1.00  0.00
ATOM   4309  O   WAT   923      14.067  11.781  35.109  1.00  0.00
ATOM   4310  H1  WAT   923      13.389  11.914  35.813  1.00  0.00
ATOM   4311  H2  WAT   923      14.014  10.799  35.029  1.00  0.00
ATOM   4312  O   WAT   924      39.212   9.307  20.911  1.00  0.00
ATOM   4313  H1  WAT   924      38.529   9.980  20.823  1.00  0.00
ATOM   4314  H2  WAT   924      40.029   9.813  20.716  1.00  0.00
ATOM   4315  O   WAT   925      -0.957 -11.520  29.478  1.00  0.00
ATOM   4316  H1  WAT   925      -0.319 -10.774  29.303  1.00  0.00
ATOM   4317  H2  WAT   925      -0.393 -12.076  30.049  1.00  0.00
ATOM   4318  O   WAT   926       9.627   6.987 -13.365  1.00  0.00
ATOM   4319  H1  WAT   926       8.864   6.993 -12.720  1.00  0.00
ATOM   4320  H2  WAT   926       9.241   6.336 -14.013  1.00  0.00
ATOM   4321  O   WAT   927      20.235  17.126  37.654  1.00  0.00
ATOM   4322  H1  WAT   927      19.864  16.444  38.259  1.00  0.00
ATOM   4323  H2  WAT   927      19.689  16.944  36.849  1.00  0.00
ATOM   4324  O   WAT   928      16.726  18.312  16.930  1.00  0.00
ATOM   4325  H1  WAT   928      15.950  18.020  17.456  1.00  0.00
ATOM   4326  H2  WAT   928      16.301  19.024  16.402  1.00  0.00
ATOM   4327  O   WAT   929       4.304  13.301 -23.460  1.00  0.00
ATOM   4328  H1  WAT   929       5.196  13.466 -23.904  1.00  0.00
ATOM   4329  H2  WAT   929       3.853  14.106 -23.839  1.00  0.00
ATOM   4330  O   WAT   930      21.400  -4.958  -8.876  1.00  0.00
ATOM   4331  H1  WAT   930      22.285  -4.576  -8.594  1.00  0.00
ATOM   4332  H2  WAT   930      21.619  -5.051  -9.844  1.00  0.00
ATOM   4333  O   WAT   931      30.543  20.823  -0.348  1.00  0.00
ATOM   4334  H1  WAT   931      31.371  20.933   0.168  1.00  0.00
ATOM   4335  H2  WAT   931      30.827  21.241  -1.198  1.00  0.00
ATOM   4336  O   WAT   932      35.650  10.766  -8.914  1.00  0.00
ATOM   4337  H1  WAT   932      36.429  10.251  -9.186  1.00  0.00
ATOM   4338  H2  WAT   932      35.085  10.107  -8.506  1.00  0.00
ATOM   4339  O   WAT   933      15.487  11.620  23.313  1.00  0.00
ATOM   4340  H1  WAT   933      15.478  11.983  24.233  1.00  0.00
ATOM   4341  H2  WAT   933      15.632  12.458  22.817  1.00  0.00
ATOM   4342  O   WAT   934      17.733  17.895 -15.417  1.00  0.00
ATOM   4343  H1  WAT   934      18.084  18.248 -16.266  1.00  0.00
ATOM   4344  H2  WAT   934      17.100  18.604 -15.180  1.00  0.00
ATOM   4345  O   WAT   935       4.152   9.711  35.882  1.00  0.00
ATOM   4346  H1  WAT   935       4.128   8.728  35.765  1.00  0.00
ATOM   4347  H2  WAT   935       5.104   9.853  35.616  1.00  0.00
ATOM   4348  O   WAT   936      30.776  -0.836  19.474  1.00  0.00
ATOM   4349  H1  WAT   936      31.451  -0.216  19.130  1.00  0.00
ATOM   4350  H2  WAT   936      30.070  -0.695  18.795  1.00  0.00
ATOM   4351  O   WAT   937     -10.481   2.382  38.543  1.00  0.00
ATOM   4352  H1  WAT   937     -10.529   1.896  39.395  1.00  0.00
ATOM   4353  H2  WAT   937      -9.734   2.990  38.748  1.00  0.00
ATOM   4354  O   WAT   938      23.626  18.970  26.502  1.00  0.00
ATOM   4355  H1  WAT   938      23.876  19.358  27.373  1.00  0.00
ATOM   4356  H2  WAT   938      24.472  18.477  26.322  1.00  0.00
ATOM   4357  O   WAT   939      24.567 -17.668 -15.381  1.00  0.00
ATOM   4358  H1  WAT   939      25.220 -18.391 -15.367  1.00  0.00
ATOM   4359  H2  WAT   939      23.899 -18.064 -16.004  1.00  0.00
ATOM   4360  O   WAT   940       1.304  32.640  40.742  1.00  0.00
ATOM   4361  H1  WAT   940       0.750  32.857  41.533  1.00  0.00
ATOM   4362  H2  WAT   940       1.327  33.515  40.310  1.00  0.00
ATOM   4363  O   WAT   941      22.766  20.214  24.289  1.00  0.00
ATOM   4364  H1  WAT   941      22.657  19.732  25.134  1.00  0.00
ATOM   4365  H2  WAT   941      21.939  19.937  23.823  1.00  0.00
ATOM   4366  O   WAT   942      13.465  10.775  26.998  1.00  0.00
ATOM   4367  H1  WAT   942      13.858   9.887  27.161  1.00  0.00
ATOM   4368  H2  WAT   942      13.459  11.135  27.904  1.00  0.00
ATOM   4369  O   WAT   943      27.734  16.895 -22.729  1.00  0.00
ATOM   4370  H1  WAT   943      28.696  16.744 -22.902  1.00  0.00
ATOM   4371  H2  WAT   943      27.375  16.035 -23.023  1.00  0.00
ATOM   4372  O   WAT   944      31.910  22.465 -23.093  1.00  0.00
ATOM   4373  H1  WAT   944      31.094  22.064 -23.493  1.00  0.00
ATOM   4374  H2  WAT   944      31.497  22.901 -22.318  1.00  0.00
ATOM   4375  O   WAT   945      28.787   0.198  36.327  1.00  0.00
ATOM   4376  H1  WAT   945      28.625  -0.679  35.916  1.00  0.00
ATOM   4377  H2  WAT   945      28.160   0.161  37.076  1.00  0.00
ATOM   4378  O   WAT   946      22.471   5.525  -8.425  1.00  0.00
ATOM   4379  H1  WAT   946      22.032   6.309  -8.026  1.00  0.00
ATOM   4380  H2  WAT   946      22.102   5.613  -9.350  1.00  0.00
ATOM   4381  O   WAT   947       8.700  32.753  28.517  1.00  0.00
ATOM   4382  H1  WAT   947       7.719  32.893  28.476  1.00  0.00
ATOM   4383  H2  WAT   947       8.787  32.625  29.490  1.00  0.00
ATOM   4384  O   WAT   948       9.608 -14.992 -18.005  1.00  0.00
ATOM   4385  H1  WAT   948       9.355 -14.887 -17.067  1.00  0.00
ATOM   4386  H2  WAT   948      10.562 -14.789 -17.967  1.00  0.00
ATOM   4387  O   WAT   949     -29.177  18.258  40.770  1.00  0.00
ATOM   4388  H1  WAT   949     -28.603  17.460  40.741  1.00  0.00
ATOM   4389  H2  WAT   949     -29.349  18.377  39.815  1.00  0.00
ATOM   4390  O   WAT   950      10.751  19.627 -18.430  1.00  0.00
ATOM   4391  H1  WAT   950      11.151  19.501 -19.308  1.00  0.00
ATOM   4392  H2  WAT   950      11.313  20.347 -18.069  1.00  0.00
ATOM   4393  O   WAT   951      16.157  27.602  25.239  1.00  0.00
ATOM   4394  H1  WAT   951      16.892  28.214  25.041  1.00  0.00
ATOM   4395  H2  WAT   951      16.356  26.861  24.634  1.00  0.00
ATOM   4396  O   WAT   952      29.859  10.253  35.582  1.00  0.00
ATOM   4397  H1  WAT   952      29.471  10.840  36.275  1.00  0.00
ATOM   4398  H2  WAT   952      29.244  10.449  34.845  1.00  0.00
ATOM   4399  O   WAT   953      13.989   4.094  29.911  1.00  0.00
ATOM   4400  H1  WAT   953      13.351   4.053  29.163  1.00  0.00
ATOM   4401  H2  WAT   953      14.827   3.939  29.419  1.00  0.00
ATOM   4402  O   WAT   954      33.250   9.916 -13.847  1.00  0.00
ATOM   4403  H1  WAT   954      32.988  10.279 -12.974  1.00  0.00
ATOM   4404  H2  WAT   954      32.765  10.519 -14.442  1.00  0.00
ATOM   4405  O   WAT   955       5.787   4.438  27.857  1.00  0.00
ATOM   4406  H1  WAT   955       6.697   4.352  27.485  1.00  0.00
ATOM   4407  H2  WAT   955       5.281   3.972  27.159  1.00  0.00
ATOM   4408  O   WAT   956      31.882   2.607  -4.333  1.00  0.00
ATOM   4409  H1  WAT   956      31.246   2.283  -4.986  1.00  0.00
ATOM   4410  H2  WAT   956      31.349   3.258  -3.834  1.00  0.00
ATOM   4411  O   WAT   957     -13.488 -16.685 -19.050  1.00  0.00
ATOM   4412  H1  WAT   957     -14.221 -16.094 -19.329  1.00  0.00
ATOM   4413  H2  WAT   957     -12.753 -16.042 -19.014  1.00  0.00
ATOM   4414  O   WAT   958       1.171  -9.841  15.670  1.00  0.00
ATOM   4415  H1  WAT   958       0.560  -9.273  15.144  1.00  0.00
ATOM   4416  H2  WAT   958       0.519 -10.470  16.051  1.00  0.00
ATOM   4417  O   WAT   959      33.367  13.996   6.752  1.00  0.00
ATOM   4418  H1  WAT   959      32.633  14.642   6.898  1.00  0.00
ATOM   4419  H2  WAT   959      34.112  14.504   7.142  1.00  0.00
ATOM   4420  O   WAT   960      22.236  -4.783 -11.432  1.00  0.00
ATOM   4421  H1  WAT   960      22.553  -3.891 -11.663  1.00  0.00
ATOM   4422  H2  WAT   960      22.250  -5.213 -12.309  1.00  0.00
ATOM   4423  O   WAT   961      17.076  24.745  38.524  1.00  0.00
ATOM   4424  H1  WAT   961      17.137  24.069  37.803  1.00  0.00
ATOM   4425  H2  WAT   961      16.581  25.444  38.024  1.00  0.00
ATOM   4426  O   WAT   962      32.110  16.480 -25.593  1.00  0.00
ATOM   4427  H1  WAT   962      32.147  17.331 -26.099  1.00  0.00
ATOM   4428  H2  WAT   962      31.898  15.875 -26.344  1.00  0.00
ATOM   4429  O   WAT   963      14.922  23.457 -15.827  1.00  0.00
ATOM   4430  H1  WAT   963      14.660  22.922 -16.603  1.00  0.00
ATOM   4431  H2  WAT   963      15.185  24.291 -16.257  1.00  0.00
ATOM   4432  O   WAT   964      27.625  10.179 -22.468  1.00  0.00
ATOM   4433  H1  WAT   964      26.691  10.000 -22.196  1.00  0.00
ATOM   4434  H2  WAT   964      28.045   9.379 -22.084  1.00  0.00
ATOM   4435  O   WAT   965      -9.231  22.597  23.156  1.00  0.00
ATOM   4436  H1  WAT   965      -9.517  23.503  23.423  1.00  0.00
ATOM   4437  H2  WAT   965      -8.736  22.352  23.979  1.00  0.00
ATOM   4438  O   WAT   966      12.553 -13.861  19.750  1.00  0.00
ATOM   4439  H1  WAT   966      12.941 -13.844  18.858  1.00  0.00
ATOM   4440  H2  WAT   966      11.704 -13.409  19.596  1.00  0.00
ATOM   4441  O   WAT   967      11.783  18.822  38.001  1.00  0.00
ATOM   4442  H1  WAT   967      12.236  19.293  37.267  1.00  0.00
ATOM   4443  H2  WAT   967      10.958  18.551  37.536  1.00  0.00
ATOM   4444  O   WAT   968      10.005  14.177  34.566  1.00  0.00
ATOM   4445  H1  WAT   968      10.898  13.848  34.352  1.00  0.00
ATOM   4446  H2  WAT   968       9.633  14.296  33.669  1.00  0.00
ATOM   4447  O   WAT   969      28.780 -13.185 -18.255  1.00  0.00
ATOM   4448  H1  WAT   969      28.434 -12.526 -17.623  1.00  0.00
ATOM   4449  H2  WAT   969      29.385 -12.625 -18.790  1.00  0.00
ATOM   4450  O   WAT   970      36.614  24.326  -4.609  1.00  0.00
ATOM   4451  H1  WAT   970      37.012  23.940  -5.413  1.00  0.00
ATOM   4452  H2  WAT   970      36.607  23.548  -4.020  1.00  0.00
ATOM   4453  O   WAT   971       2.109 -17.421 -24.788  1.00  0.00
ATOM   4454  H1  WAT   971       1.275 -17.659 -25.275  1.00  0.00
ATOM   4455  H2  WAT   971       2.132 -18.204 -24.178  1.00  0.00
ATOM   4456  O   WAT   972      38.416  32.815 -21.689  1.00  0.00
ATOM   4457  H1  WAT   972      38.571  31.865 -21.564  1.00  0.00
ATOM   4458  H2  WAT   972      38.669  33.171 -20.819  1.00  0.00
ATOM   4459  O   WAT   973     -20.428  18.456   3.167  1.00  0.00
ATOM   4460  H1  WAT   973     -20.794  17.841   3.842  1.00  0.00
ATOM   4461  H2  WAT   973     -19.514  18.113   3.104  1.00  0.00
ATOM   4462  O   WAT   974       9.544   9.944  30.372  1.00  0.00
ATOM   4463  H1  WAT   974      10.439  10.142  30.697  1.00  0.00
ATOM   4464  H2  WAT   974       9.479  10.564  29.616  1.00  0.00
ATOM   4465  O   WAT   975      14.303   4.144 -23.330  1.00  0.00
ATOM   4466  H1  WAT   975      13.621   3.454 -23.457  1.00  0.00
ATOM   4467  H2  WAT   975      14.334   4.174 -22.343  1.00  0.00
ATOM   4468  O   WAT   976       3.225  30.874  14.257  1.00  0.00
ATOM   4469  H1  WAT   976       4.080  31.214  13.924  1.00  0.00
ATOM   4470  H2  WAT   976       2.737  31.733  14.335  1.00  0.00
ATOM   4471  O   WAT   977      -4.020 -11.712 -23.305  1.00  0.00
ATOM   4472  H1  WAT   977      -4.929 -11.716 -22.918  1.00  0.00
ATOM   4473  H2  WAT   977      -3.764 -12.645 -23.159  1.00  0.00
ATOM   4474  O   WAT   978      18.143   1.693  29.798  1.00  0.00
ATOM   4475  H1  WAT   978      18.323   1.645  30.760  1.00  0.00
ATOM   4476  H2  WAT   978      18.379   0.786  29.526  1.00  0.00
ATOM   4477  O   WAT   979      26.822   7.123 -14.871  1.00  0.00
ATOM   4478  H1  WAT   979      27.449   6.568 -15.381  1.00  0.00
ATOM   4479  H2  WAT   979      27.346   7.962 -14.833  1.00  0.00
ATOM   4480  O   WAT   980      29.334  30.378  35.671  1.00  0.00
ATOM   4481  H1  WAT   980      29.059  29.496  35.313  1.00  0.00
ATOM   4482  H2  WAT   980      30.115  30.101  36.194  1.00  0.00
ATOM   4483  O   WAT   981      30.594  -5.455 -18.800  1.00  0.00
ATOM   4484  H1  WAT   981      30.714  -5.174 -19.746  1.00  0.00
ATOM   4485  H2  WAT   981      31.538  -5.381 -18.520  1.00  0.00
ATOM   4486  O   WAT   982      20.091  -0.313   0.840  1.00  0.00
ATOM   4487  H1  WAT   982      19.435   0.420   0.876  1.00  0.00
ATOM   4488  H2  WAT   982      20.365  -0.344   1.779  1.00  0.00
ATOM   4489  O   WAT   983      24.948  22.083 -15.103  1.00  0.00
ATOM   4490  H1  WAT   983      24.844  22.457 -16.007  1.00  0.00
ATOM   4491  H2  WAT   983      25.915  22.072 -15.024  1.00  0.00
ATOM   4492  O   WAT   984      28.520  23.517 -17.720  1.00  0.00
ATOM   4493  H1  WAT   984      28.456  22.804 -18.375  1.00  0.00
ATOM   4494  H2  WAT   984      29.456  23.424 -17.439  1.00  0.00
ATOM   4495  O   WAT   985      20.751  -8.798  30.338  1.00  0.00
ATOM   4496  H1  WAT   985      20.089  -9.118  29.695  1.00  0.00
ATOM   4497  H2  WAT   985      21.376  -8.345  29.737  1.00  0.00
ATOM   4498  O   WAT   986      22.840 -13.721  21.226  1.00  0.00
ATOM   4499  H1  WAT   986      22.678 -12.868  21.691  1.00  0.00
ATOM   4500  H2  WAT   986      23.543 -14.081  21.814  1.00  0.00
ATOM   4501  O   WAT   987      21.693   4.558   5.514  1.00  0.00
ATOM   4502  H1  WAT   987      21.712   4.267   6.448  1.00  0.00
ATOM   4503  H2  WAT   987      20.837   5.032   5.495  1.00  0.00
ATOM   4504  O   WAT   988      22.902 -15.823  -5.386  1.00  0.00
ATOM   4505  H1  WAT   988      23.562 -15.283  -5.866  1.00  0.00
ATOM   4506  H2  WAT   988      23.463 -16.555  -5.063  1.00  0.00
ATOM   4507  O   WAT   989      19.659  -2.335 -23.284  1.00  0.00
ATOM   4508  H1  WAT   989      20.589  -2.178 -23.005  1.00  0.00
ATOM   4509  H2  WAT   989      19.190  -1.819 -22.589  1.00  0.00
ATOM   4510  O   WAT   990      32.052  26.414 -26.537  1.00  0.00
ATOM   4511  H1  WAT   990      32.277  27.037 -25.802  1.00  0.00
ATOM   4512  H2  WAT   990      31.092  26.577 -26.602  1.00  0.00
ATOM   4513  O   WAT   991      15.416  17.547  32.693  1.00  0.00
ATOM   4514  H1  WAT   991      16.266  18.047  32.634  1.00  0.00
ATOM   4515  H2  WAT   991      15.719  16.810  33.279  1.00  0.00
ATOM   4516  O   WAT   992      15.847  21.319  32.604  1.00  0.00
ATOM   4517  H1  WAT   992      16.372  20.779  33.218  1.00  0.00
ATOM   4518  H2  WAT   992      15.361  20.636  32.111  1.00  0.00
ATOM   4519  O   WAT   993       4.589  18.495  33.173  1.00  0.00
ATOM   4520  H1  WAT   993       4.110  17.647  33.187  1.00  0.00
ATOM   4521  H2  WAT   993       5.080  18.454  34.015  1.00  0.00
ATOM   4522  O   WAT   994      10.577  -2.883  -9.336  1.00  0.00
ATOM   4523  H1  WAT   994      10.065  -3.392 -10.026  1.00  0.00
ATOM   4524  H2  WAT   994       9.849  -2.787  -8.673  1.00  0.00
ATOM   4525  O   WAT   995      12.055   6.191  25.456  1.00  0.00
ATOM   4526  H1  WAT   995      11.180   5.828  25.154  1.00  0.00
ATOM   4527  H2  WAT   995      11.904   7.131  25.160  1.00  0.00
ATOM   4528  O   WAT   996       1.661  16.131  25.491  1.00  0.00
ATOM   4529  H1  WAT   996       2.498  16.380  25.043  1.00  0.00
ATOM   4530  H2  WAT   996       1.041  16.150  24.728  1.00  0.00
ATOM   4531  O   WAT   997      22.839  10.915  36.060  1.00  0.00
ATOM   4532  H1  WAT   997      22.702  11.151  37.006  1.00  0.00
ATOM   4533  H2  WAT   997      23.738  11.311  35.929  1.00  0.00
ATOM   4534  O   WAT   998     -18.377  -7.813  34.869  1.00  0.00
ATOM   4535  H1  WAT   998     -19.122  -8.381  35.206  1.00  0.00
ATOM   4536  H2  WAT   998     -18.328  -8.160  33.954  1.00  0.00
ATOM   4537  O   WAT   999      23.326  -6.060  -2.963  1.00  0.00
ATOM   4538  H1  WAT   999      22.355  -5.909  -2.863  1.00  0.00
ATOM   4539  H2  WAT   999      23.571  -5.204  -3.388  1.00  0.00
ATOM   4540  O   WAT  1000       0.277  -1.143  34.603  1.00  0.00
ATOM   4541  H1  WAT  1000      -0.648  -1.173  34.246  1.00  0.00
ATOM   4542  H2  WAT  1000       0.640  -0.426  34.047  1.00  0.00
ATOM   4543  O   WAT  1001      -5.668 -12.944  19.523  1.00  0.00
ATOM   4544  H1  WAT  1001      -5.422 -12.585  18.632  1.00  0.00
ATOM   4545  H2  WAT  1001      -6.607 -12.621  19.552  1.00  0.00
ATOM   4546  O   WAT  1002      30.046  10.916  29.811  1.00  0.00
ATOM   4547  H1  WAT  1002      30.568  11.156  30.599  1.00  0.00
ATOM   4548  H2  WAT  1002      30.682  10.364  29.318  1.00  0.00
ATOM   4549  O   WAT  1003     -20.521   9.824  -9.807  1.00  0.00
ATOM   4550  H1  WAT  1003     -19.882   9.081  -9.845  1.00  0.00
ATOM   4551  H2  WAT  1003     -21.116   9.475  -9.095  1.00  0.00
ATOM   4552  O   WAT  1004       8.657  -5.939   8.377  1.00  0.00
ATOM   4553  H1  WAT  1004       8.397  -6.864   8.150  1.00  0.00
ATOM   4554  H2  WAT  1004       7.776  -5.593   8.643  1.00  0.00
ATOM   4555  O   WAT  1005      32.893 -21.471  -4.019  1.00  0.00
ATOM   4556  H1  WAT  1005      32.332 -22.247  -4.232  1.00  0.00
ATOM   4557  H2  WAT  1005      33.692 -21.702  -4.536  1.00  0.00
ATOM   4558  O   WAT  1006      34.205  -2.365  24.728  1.00  0.00
ATOM   4559  H1  WAT  1006      33.247  -2.347  24.575  1.00  0.00
ATOM   4560  H2  WAT  1006      34.228  -2.550  25.695  1.00  0.00
ATOM   4561  O   WAT  1007       0.697 -11.503  11.591  1.00  0.00
ATOM   4562  H1  WAT  1007       0.442 -11.930  12.440  1.00  0.00
ATOM   4563  H2  WAT  1007       1.670 -11.493  11.696  1.00  0.00
ATOM   4564  O   WAT  1008      10.388   0.493  13.349  1.00  0.00
ATOM   4565  H1  WAT  1008      11.162   0.862  13.795  1.00  0.00
ATOM   4566  H2  WAT  1008      10.232   1.173  12.653  1.00  0.00
ATOM   4567  O   WAT  1009      14.997  -2.774  17.135  1.00  0.00
ATOM   4568  H1  WAT  1009      15.734  -2.255  16.745  1.00  0.00
ATOM   4569  H2  WAT  1009      14.689  -3.243  16.318  1.00  0.00
ATOM   4570  O   WAT  1010      37.967  -2.310  34.031  1.00  0.00
ATOM   4571  H1  WAT  1010      37.307  -1.909  34.653  1.00  0.00
ATOM   4572  H2  WAT  1010      38.107  -3.172  34.507  1.00  0.00
ATOM   4573  O   WAT  1011      18.553   4.710  -9.558  1.00  0.00
ATOM   4574  H1  WAT  1011      18.924   4.640  -8.662  1.00  0.00
ATOM   4575  H2  WAT  1011      18.839   3.850  -9.942  1.00  0.00
ATOM   4576  O   WAT  1012      14.577 -12.778  27.167  1.00  0.00
ATOM   4577  H1  WAT  1012      14.706 -12.493  28.098  1.00  0.00
ATOM   4578  H2  WAT  1012      15.514 -12.889  26.895  1.00  0.00
ATOM   4579  O   WAT  1013       4.413   5.930  33.896  1.00  0.00
ATOM   4580  H1  WAT  1013       4.213   6.561  34.642  1.00  0.00
ATOM   4581  H2  WAT  1013       4.455   6.610  33.168  1.00  0.00
ATOM   4582  O   WAT  1014      33.480 -19.842   3.513  1.00  0.00
ATOM   4583  H1  WAT  1014      34.117 -19.150   3.187  1.00  0.00
ATOM   4584  H2  WAT  1014      33.079 -19.334   4.254  1.00  0.00
ATOM   4585  O   WAT  1015      26.023   1.024  27.536  1.00  0.00
ATOM   4586  H1  WAT  1015      25.585   0.681  26.719  1.00  0.00
ATOM   4587  H2  WAT  1015      25.225   1.247  28.067  1.00  0.00
ATOM   4588  O   WAT  1016      18.082   0.265  21.537  1.00  0.00
ATOM   4589  H1  WAT  1016      17.383   0.599  22.130  1.00  0.00
ATOM   4590  H2  WAT  1016      18.870   0.693  21.946  1.00  0.00
ATOM   4591  O   WAT  1017      11.910  36.294  29.537  1.00  0.00
ATOM   4592  H1  WAT  1017      11.202  36.767  30.021  1.00  0.00
ATOM   4593  H2  WAT  1017      12.450  37.036  29.216  1.00  0.00
ATOM   4594  O   WAT  1018      20.080  38.408  37.412  1.00  0.00
ATOM   4595  H1  WAT  1018      19.667  38.990  38.089  1.00  0.00
ATOM   4596  H2  WAT  1018      19.793  37.533  37.753  1.00  0.00
ATOM   4597  O   WAT  1019      16.084  30.371  21.909  1.00  0.00
ATOM   4598  H1  WAT  1019      17.013  30.088  21.980  1.00  0.00
ATOM   4599  H2  WAT  1019      15.683  29.595  21.478  1.00  0.00
ATOM   4600  O   WAT  1020      16.451   1.693  10.565  1.00  0.00
ATOM   4601  H1  WAT  1020      15.745   1.035  10.668  1.00  0.00
ATOM   4602  H2  WAT  1020      17.150   1.311  11.128  1.00  0.00
ATOM   4603  O   WAT  1021      10.949  17.267 -20.386  1.00  0.00
ATOM   4604  H1  WAT  1021      10.007  16.998 -20.272  1.00  0.00
ATOM   4605  H2  WAT  1021      11.367  16.672 -19.729  1.00  0.00
ATOM   4606  O   WAT  1022     -17.711  11.856   9.034  1.00  0.00
ATOM   4607  H1  WAT  1022     -17.585  12.745   8.628  1.00  0.00
ATOM   4608  H2  WAT  1022     -18.657  11.704   8.812  1.00  0.00
ATOM   4609  O   WAT  1023      -0.749  -7.571   1.861  1.00  0.00
ATOM   4610  H1  WAT  1023      -0.317  -8.450   1.834  1.00  0.00
ATOM   4611  H2  WAT  1023      -0.205  -7.098   1.187  1.00  0.00
ATOM   4612  O   WAT  1024      -4.126  32.956  -0.871  1.00  0.00
ATOM   4613  H1  WAT  1024      -4.327  32.980  -1.835  1.00  0.00
ATOM   4614  H2  WAT  1024      -4.519  32.079  -0.648  1.00  0.00
ATOM   4615  O   WAT  1025      34.181  -7.888 -14.988  1.00  0.00
ATOM   4616  H1  WAT  1025      33.783  -7.058 -14.661  1.00  0.00
ATOM   4617  H2  WAT  1025      34.952  -7.542 -15.474  1.00  0.00
ATOM   4618  O   WAT  1026      28.193  30.241  13.273  1.00  0.00
ATOM   4619  H1  WAT  1026      27.460  29.622  13.481  1.00  0.00
ATOM   4620  H2  WAT  1026      27.715  30.962  12.837  1.00  0.00
ATOM   4621  O   WAT  1027     -22.606  27.367   0.550  1.00  0.00
ATOM   4622  H1  WAT  1027     -22.735  26.409   0.373  1.00  0.00
ATOM   4623  H2  WAT  1027     -23.458  27.709   0.187  1.00  0.00
ATOM   4624  O   WAT  1028      15.240  -1.708  12.233  1.00  0.00
ATOM   4625  H1  WAT  1028      15.520  -2.649  12.368  1.00  0.00
ATOM   4626  H2  WAT  1028      14.300  -1.873  12.000  1.00  0.00
ATOM   4627  O   WAT  1029      16.232   4.201  13.877  1.00  0.00
ATOM   4628  H1  WAT  1029      15.599   4.685  13.284  1.00  0.00
ATOM   4629  H2  WAT  1029      17.068   4.403  13.390  1.00  0.00
ATOM   4630  O   WAT  1030      31.738  19.427  28.399  1.00  0.00
ATOM   4631  H1  WAT  1030      32.161  20.188  27.951  1.00  0.00
ATOM   4632  H2  WAT  1030      32.276  19.365  29.208  1.00  0.00
ATOM   4633  O   WAT  1031       0.163 -17.698   8.309  1.00  0.00
ATOM   4634  H1  WAT  1031      -0.063 -17.498   9.242  1.00  0.00
ATOM   4635  H2  WAT  1031       0.529 -16.828   8.037  1.00  0.00
ATOM   4636  O   WAT  1032      22.489 -13.284  18.347  1.00  0.00
ATOM   4637  H1  WAT  1032      22.600 -13.321  19.327  1.00  0.00
ATOM   4638  H2  WAT  1032      23.425 -13.400  18.076  1.00  0.00
ATOM   4639  O   WAT  1033      -5.508 -13.828 -20.934  1.00  0.00
ATOM   4640  H1  WAT  1033      -5.707 -12.899 -21.179  1.00  0.00
ATOM   4641  H2  WAT  1033      -5.955 -13.875 -20.063  1.00  0.00
ATOM   4642  O   WAT  1034      17.991 -15.970   2.645  1.00  0.00
ATOM   4643  H1  WAT  1034      17.451 -15.342   3.183  1.00  0.00
ATOM   4644  H2  WAT  1034      17.670 -15.713   1.747  1.00  0.00
ATOM   4645  O   WAT  1035      32.068 -12.465  -7.597  1.00  0.00
ATOM   4646  H1  WAT  1035      31.297 -12.873  -7.117  1.00  0.00
ATOM   4647  H2  WAT  1035      31.792 -12.683  -8.513  1.00  0.00
ATOM   4648  O   WAT  1036      18.605   4.532  27.060  1.00  0.00
ATOM   4649  H1  WAT  1036      18.131   4.063  26.343  1.00  0.00
ATOM   4650  H2  WAT  1036      19.287   5.012  26.540  1.00  0.00
ATOM   4651  O   WAT  1037       3.095  -9.428  20.175  1.00  0.00
ATOM   4652  H1  WAT  1037       2.999  -9.230  19.217  1.00  0.00
ATOM   4653  H2  WAT  1037       3.994  -9.790  20.197  1.00  0.00
ATOM   4654  O   WAT  1038      14.693 -14.375  10.439  1.00  0.00
ATOM   4655  H1  WAT  1038      15.335 -15.097  10.239  1.00  0.00
ATOM   4656  H2  WAT  1038      14.334 -14.708  11.295  1.00  0.00
ATOM   4657  O   WAT  1039      10.805  -2.211  12.808  1.00  0.00
ATOM   4658  H1  WAT  1039      10.594  -1.310  13.140  1.00  0.00
ATOM   4659  H2  WAT  1039      11.028  -2.657  13.657  1.00  0.00
ATOM   4660  O   WAT  1040      37.943  14.681 -10.424  1.00  0.00
ATOM   4661  H1  WAT  1040      37.438  14.110  -9.790  1.00  0.00
ATOM   4662  H2  WAT  1040      38.729  14.886  -9.881  1.00  0.00
ATOM   4663  O   WAT  1041      32.789  -5.989  31.713  1.00  0.00
ATOM   4664  H1  WAT  1041      32.072  -6.175  32.343  1.00  0.00
ATOM   4665  H2  WAT  1041      33.560  -6.354  32.204  1.00  0.00
ATOM   4666  O   WAT  1042      15.003  -7.192  39.176  1.00  0.00
ATOM   4667  H1  WAT  1042      14.228  -7.613  38.735  1.00  0.00
ATOM   4668  H2  WAT  1042      15.444  -7.980  39.549  1.00  0.00
ATOM   4669  O   WAT  1043      23.045  22.063  -5.210  1.00  0.00
ATOM   4670  H1  WAT  1043      23.848  21.781  -5.700  1.00  0.00
ATOM   4671  H2  WAT  1043      22.890  22.941  -5.619  1.00  0.00
ATOM   4672  O   WAT  1044      -7.437   2.477  29.422  1.00  0.00
ATOM   4673  H1  WAT  1044      -8.225   2.623  29.988  1.00  0.00
ATOM   4674  H2  WAT  1044      -7.037   1.711  29.893  1.00  0.00
ATOM   4675  O   WAT  1045      19.883   1.425  23.158  1.00  0.00
ATOM   4676  H1  WAT  1045      20.665   0.816  23.091  1.00  0.00
ATOM   4677  H2  WAT  1045      19.440   1.014  23.938  1.00  0.00
ATOM   4678  O   WAT  1046     -26.673  30.219 -12.595  1.00  0.00
ATOM   4679  H1  WAT  1046     -26.837  31.121 -12.936  1.00  0.00
ATOM   4680  H2  WAT  1046     -25.726  30.277 -12.364  1.00  0.00
ATOM   4681  O   WAT  1047       6.984 -17.266  18.289  1.00  0.00
ATOM   4682  H1  WAT  1047       7.442 -16.400  18.236  1.00  0.00
ATOM   4683  H2  WAT  1047       6.662 -17.333  17.361  1.00  0.00
ATOM   4684  O   WAT  1048      19.472  11.587  17.828  1.00  0.00
ATOM   4685  H1  WAT  1048      19.594  10.633  17.962  1.00  0.00
ATOM   4686  H2  WAT  1048      20.090  11.945  18.502  1.00  0.00
ATOM   4687  O   WAT  1049      30.902   2.943  23.326  1.00  0.00
ATOM   4688  H1  WAT  1049      30.057   3.402  23.127  1.00  0.00
ATOM   4689  H2  WAT  1049      31.220   2.747  22.429  1.00  0.00
ATOM   4690  O   WAT  1050      15.656   1.145  40.119  1.00  0.00
ATOM   4691  H1  WAT  1050      16.577   0.931  40.364  1.00  0.00
ATOM   4692  H2  WAT  1050      15.174   0.530  40.721  1.00  0.00
ATOM   4693  O   WAT  1051      13.382 -12.862  16.962  1.00  0.00
ATOM   4694  H1  WAT  1051      12.412 -12.737  17.068  1.00  0.00
ATOM   4695  H2  WAT  1051      13.712 -12.116  17.503  1.00  0.00
ATOM   4696  O   WAT  1052      19.394   8.257  36.467  1.00  0.00
ATOM   4697  H1  WAT  1052      20.348   8.479  36.348  1.00  0.00
ATOM   4698  H2  WAT  1052      19.491   7.693  37.288  1.00  0.00
ATOM   4699  O   WAT  1053      18.121   4.616   7.827  1.00  0.00
ATOM   4700  H1  WAT  1053      17.314   4.272   8.287  1.00  0.00
ATOM   4701  H2  WAT  1053      18.123   5.530   8.165  1.00  0.00
ATOM   4702  O   WAT  1054      33.884   6.026   6.987  1.00  0.00
ATOM   4703  H1  WAT  1054      33.936   6.734   7.664  1.00  0.00
ATOM   4704  H2  WAT  1054      33.522   6.551   6.239  1.00  0.00
ATOM   4705  O   WAT  1055      18.445  -2.633   3.708  1.00  0.00
ATOM   4706  H1  WAT  1055      18.938  -2.571   4.566  1.00  0.00
ATOM   4707  H2  WAT  1055      19.228  -2.577   3.097  1.00  0.00
ATOM   4708  O   WAT  1056      19.894  22.030  37.605  1.00  0.00
ATOM   4709  H1  WAT  1056      20.481  22.690  37.196  1.00  0.00
ATOM   4710  H2  WAT  1056      19.025  22.307  37.248  1.00  0.00
ATOM   4711  O   WAT  1057       3.911   1.975  21.751  1.00  0.00
ATOM   4712  H1  WAT  1057       4.317   1.139  22.071  1.00  0.00
ATOM   4713  H2  WAT  1057       2.980   1.833  22.012  1.00  0.00
ATOM   4714  O   WAT  1058      28.196  -5.023 -25.758  1.00  0.00
ATOM   4715  H1  WAT  1058      27.520  -4.821 -26.426  1.00  0.00
ATOM   4716  H2  WAT  1058      28.470  -5.921 -26.023  1.00  0.00
ATOM   4717  O   WAT  1059       9.920  -9.187   1.053  1.00  0.00
ATOM   4718  H1  WAT  1059       8.962  -8.966   1.073  1.00  0.00
ATOM   4719  H2  WAT  1059      10.288  -8.300   0.856  1.00  0.00
ATOM   4720  O   WAT  1060      15.412 -19.634  12.203  1.00  0.00
ATOM   4721  H1  WAT  1060      15.976 -19.636  13.029  1.00  0.00
ATOM   4722  H2  WAT  1060      14.785 -20.356  12.484  1.00  0.00
ATOM   4723  O   WAT  1061       3.035  -4.206  23.451  1.00  0.00
ATOM   4724  H1  WAT  1061       3.482  -5.015  23.123  1.00  0.00
ATOM   4725  H2  WAT  1061       2.875  -4.457  24.381  1.00  0.00
ATOM   4726  O   WAT  1062      17.808 -11.089  -7.931  1.00  0.00
ATOM   4727  H1  WAT  1062      18.692 -11.280  -7.562  1.00  0.00
ATOM   4728  H2  WAT  1062      17.364 -11.955  -7.784  1.00  0.00
ATOM   4729  O   WAT  1063      19.506   7.705  -9.720  1.00  0.00
ATOM   4730  H1  WAT  1063      18.580   7.530  -9.469  1.00  0.00
ATOM   4731  H2  WAT  1063      19.774   6.819 -10.045  1.00  0.00
ATOM   4732  O   WAT  1064      31.133  37.338  12.386  1.00  0.00
ATOM   4733  H1  WAT  1064      30.950  38.169  12.909  1.00  0.00
ATOM   4734  H2  WAT  1064      30.300  37.316  11.866  1.00  0.00
ATOM   4735  O   WAT  1065      13.415   9.813  23.146  1.00  0.00
ATOM   4736  H1  WAT  1065      13.983   9.098  23.558  1.00  0.00
ATOM   4737  H2  WAT  1065      14.150  10.439  22.923  1.00  0.00
ATOM   4738  O   WAT  1066      18.415   2.273  32.555  1.00  0.00
ATOM   4739  H1  WAT  1066      18.311   1.581  33.245  1.00  0.00
ATOM   4740  H2  WAT  1066      17.566   2.767  32.712  1.00  0.00
ATOM   4741  O   WAT  1067       5.912  30.710  25.041  1.00  0.00
ATOM   4742  H1  WAT  1067       5.744  29.816  24.679  1.00  0.00
ATOM   4743  H2  WAT  1067       6.102  30.500  25.971  1.00  0.00
ATOM   4744  O   WAT  1068      17.367  -8.472  29.849  1.00  0.00
ATOM   4745  H1  WAT  1068      17.819  -7.660  30.182  1.00  0.00
ATOM   4746  H2  WAT  1068      17.343  -8.982  30.697  1.00  0.00
ATOM   4747  O   WAT  1069      21.732  39.467 -16.254  1.00  0.00
ATOM   4748  H1  WAT  1069      21.776  39.496 -15.257  1.00  0.00
ATOM   4749  H2  WAT  1069      21.561  38.499 -16.353  1.00  0.00
ATOM   4750  O   WAT  1070       6.538  13.968 -24.410  1.00  0.00
ATOM   4751  H1  WAT  1070       7.237  13.510 -23.876  1.00  0.00
ATOM   4752  H2  WAT  1070       7.055  14.788 -24.633  1.00  0.00
ATOM   4753  O   WAT  1071      31.824  28.283  28.879  1.00  0.00
ATOM   4754  H1  WAT  1071      32.053  27.337  28.811  1.00  0.00
ATOM   4755  H2  WAT  1071      32.587  28.691  28.423  1.00  0.00
ATOM   4756  O   WAT  1072      31.509  -5.637  20.677  1.00  0.00
ATOM   4757  H1  WAT  1072      31.987  -4.918  20.217  1.00  0.00
ATOM   4758  H2  WAT  1072      30.579  -5.332  20.540  1.00  0.00
ATOM   4759  O   WAT  1073      27.051  -6.645  -3.047  1.00  0.00
ATOM   4760  H1  WAT  1073      26.945  -5.756  -3.475  1.00  0.00
ATOM   4761  H2  WAT  1073      27.834  -6.455  -2.488  1.00  0.00
ATOM   4762  O   WAT  1074      21.046 -10.468  20.668  1.00  0.00
ATOM   4763  H1  WAT  1074      20.398  -9.872  21.113  1.00  0.00
ATOM   4764  H2  WAT  1074      21.499 -10.844  21.448  1.00  0.00
ATOM   4765  O   WAT  1075       0.333  39.331   3.361  1.00  0.00
ATOM   4766  H1  WAT  1075       1.205  39.009   3.655  1.00  0.00
ATOM   4767  H2  WAT  1075       0.506  39.535   2.429  1.00  0.00
ATOM   4768  O   WAT  1076      31.362  25.678  21.167  1.00  0.00
ATOM   4769  H1  WAT  1076      30.576  25.635  20.565  1.00  0.00
ATOM   4770  H2  WAT  1076      31.765  26.510  20.829  1.00  0.00
ATOM   4771  O   WAT  1077      11.777   8.490  28.809  1.00  0.00
ATOM   4772  H1  WAT  1077      10.996   8.532  28.199  1.00  0.00
ATOM   4773  H2  WAT  1077      12.459   8.220  28.156  1.00  0.00
ATOM   4774  O   WAT  1078      28.721  16.420 -15.815  1.00  0.00
ATOM   4775  H1  WAT  1078      29.546  15.908 -15.660  1.00  0.00
ATOM   4776  H2  WAT  1078      29.089  17.243 -16.181  1.00  0.00
ATOM   4777  O   WAT  1079      26.766  39.082  -5.612  1.00  0.00
ATOM   4778  H1  WAT  1079      26.953  39.504  -6.480  1.00  0.00
ATOM   4779  H2  WAT  1079      27.689  38.954  -5.293  1.00  0.00
ATOM   4780  O   WAT  1080      11.725  -6.193  20.533  1.00  0.00
ATOM   4781  H1  WAT  1080      12.055  -5.813  21.363  1.00  0.00
ATOM   4782  H2  WAT  1080      11.696  -5.386  19.964  1.00  0.00
ATOM   4783  O   WAT  1081      32.605   4.932  -8.523  1.00  0.00
ATOM   4784  H1  WAT  1081      31.921   5.249  -7.883  1.00  0.00
ATOM   4785  H2  WAT  1081      32.126   5.178  -9.361  1.00  0.00
ATOM   4786  O   WAT  1082      27.382   2.609   5.865  1.00  0.00
ATOM   4787  H1  WAT  1082      28.184   3.045   6.248  1.00  0.00
ATOM   4788  H2  WAT  1082      26.943   3.404   5.491  1.00  0.00
ATOM   4789  O   WAT  1083      36.329   2.002  -3.528  1.00  0.00
ATOM   4790  H1  WAT  1083      36.078   1.363  -2.825  1.00  0.00
ATOM   4791  H2  WAT  1083      36.173   1.453  -4.322  1.00  0.00
ATOM   4792  O   WAT  1084      37.082 -18.636   1.159  1.00  0.00
ATOM   4793  H1  WAT  1084      37.735 -18.050   1.583  1.00  0.00
ATOM   4794  H2  WAT  1084      36.945 -18.174   0.305  1.00  0.00
ATOM   4795  O   WAT  1085     -25.394 -18.234  33.555  1.00  0.00
ATOM   4796  H1  WAT  1085     -26.071 -18.803  33.979  1.00  0.00
ATOM   4797  H2  WAT  1085     -24.859 -17.981  34.335  1.00  0.00
ATOM   4798  O   WAT  1086      16.541 -16.214   9.663  1.00  0.00
ATOM   4799  H1  WAT  1086      16.189 -16.956   9.122  1.00  0.00
ATOM   4800  H2  WAT  1086      17.374 -16.035   9.188  1.00  0.00
ATOM   4801  O   WAT  1087      18.145  -1.401  -5.240  1.00  0.00
ATOM   4802  H1  WAT  1087      17.240  -1.259  -5.564  1.00  0.00
ATOM   4803  H2  WAT  1087      18.014  -2.224  -4.707  1.00  0.00
ATOM   4804  O   WAT  1088      28.697 -14.748  17.816  1.00  0.00
ATOM   4805  H1  WAT  1088      28.089 -14.479  18.526  1.00  0.00
ATOM   4806  H2  WAT  1088      28.205 -15.496  17.415  1.00  0.00
ATOM   4807  O   WAT  1089      33.277  -0.703 -15.469  1.00  0.00
ATOM   4808  H1  WAT  1089      32.779  -1.000 -14.697  1.00  0.00
ATOM   4809  H2  WAT  1089      33.513   0.207 -15.231  1.00  0.00
ATOM   4810  O   WAT  1090      -0.337 -16.704  -1.295  1.00  0.00
ATOM   4811  H1  WAT  1090      -0.731 -16.108  -0.633  1.00  0.00
ATOM   4812  H2  WAT  1090       0.092 -16.066  -1.893  1.00  0.00
ATOM   4813  O   WAT  1091      30.494 -13.522 -11.541  1.00  0.00
ATOM   4814  H1  WAT  1091      31.174 -14.231 -11.525  1.00  0.00
ATOM   4815  H2  WAT  1091      30.238 -13.519 -10.588  1.00  0.00
ATOM   4816  O   WAT  1092      34.223  37.433  20.187  1.00  0.00
ATOM   4817  H1  WAT  1092      34.485  36.878  19.412  1.00  0.00
ATOM   4818  H2  WAT  1092      35.112  37.748  20.463  1.00  0.00
ATOM   4819  O   WAT  1093       3.255  -9.303  -6.064  1.00  0.00
ATOM   4820  H1  WAT  1093       3.658  -8.692  -6.722  1.00  0.00
ATOM   4821  H2  WAT  1093       4.071  -9.530  -5.547  1.00  0.00
ATOM   4822  O   WAT  1094      22.803   3.336  10.724  1.00  0.00
ATOM   4823  H1  WAT  1094      22.171   4.103  10.764  1.00  0.00
ATOM   4824  H2  WAT  1094      23.347   3.640   9.961  1.00  0.00
ATOM   4825  O   WAT  1095      35.124  32.540  26.669  1.00  0.00
ATOM   4826  H1  WAT  1095      35.584  32.107  27.430  1.00  0.00
ATOM   4827  H2  WAT  1095      35.728  32.243  25.942  1.00  0.00
ATOM   4828  O   WAT  1096      24.774  -5.045  -6.233  1.00  0.00
ATOM   4829  H1  WAT  1096      25.731  -5.056  -6.429  1.00  0.00
ATOM   4830  H2  WAT  1096      24.551  -5.988  -6.391  1.00  0.00
ATOM   4831  O   WAT  1097      16.510  -9.078   0.757  1.00  0.00
ATOM   4832  H1  WAT  1097      16.370  -9.232  -0.203  1.00  0.00
ATOM   4833  H2  WAT  1097      15.857  -8.354   0.902  1.00  0.00
ATOM   4834  O   WAT  1098      21.199   9.345   6.890  1.00  0.00
ATOM   4835  H1  WAT  1098      21.485   8.963   7.753  1.00  0.00
ATOM   4836  H2  WAT  1098      22.065   9.365   6.427  1.00  0.00
ATOM   4837  O   WAT  1099      35.376  -0.040   4.574  1.00  0.00
ATOM   4838  H1  WAT  1099      34.481  -0.166   4.218  1.00  0.00
ATOM   4839  H2  WAT  1099      35.189   0.686   5.230  1.00  0.00
ATOM   4840  O   WAT  1100      19.158 -12.267   3.072  1.00  0.00
ATOM   4841  H1  WAT  1100      18.639 -12.457   3.883  1.00  0.00
ATOM   4842  H2  WAT  1100      18.729 -11.431   2.788  1.00  0.00
ATOM   4843  O   WAT  1101     -13.343   1.382   8.226  1.00  0.00
ATOM   4844  H1  WAT  1101     -13.524   0.642   8.826  1.00  0.00
ATOM   4845  H2  WAT  1101     -12.947   0.929   7.458  1.00  0.00
ATOM   4846  O   WAT  1102      34.939 -13.765  -8.578  1.00  0.00
ATOM   4847  H1  WAT  1102      34.794 -14.706  -8.779  1.00  0.00
ATOM   4848  H2  WAT  1102      34.030 -13.459  -8.425  1.00  0.00
ATOM   4849  O   WAT  1103     -19.945  -5.701  19.110  1.00  0.00
ATOM   4850  H1  WAT  1103     -20.439  -4.924  18.722  1.00  0.00
ATOM   4851  H2  WAT  1103     -20.705  -6.118  19.592  1.00  0.00
ATOM   4852  O   WAT  1104      26.866 -13.716 -22.740  1.00  0.00
ATOM   4853  H1  WAT  1104      27.332 -14.202 -22.022  1.00  0.00
ATOM   4854  H2  WAT  1104      26.534 -12.947 -22.222  1.00  0.00
ATOM   4855  O   WAT  1105     -25.477  -5.607   0.454  1.00  0.00
ATOM   4856  H1  WAT  1105     -24.792  -5.809   1.158  1.00  0.00
ATOM   4857  H2  WAT  1105     -25.573  -4.651   0.608  1.00  0.00
ATOM   4858  O   WAT  1106      40.349  -0.374  -1.886  1.00  0.00
ATOM   4859  H1  WAT  1106      40.126  -0.453  -2.843  1.00  0.00
ATOM   4860  H2  WAT  1106      39.783  -1.135  -1.550  1.00  0.00
ATOM   4861  O   WAT  1107      33.810   2.106  36.622  1.00  0.00
ATOM   4862  H1  WAT  1107      34.509   1.977  35.965  1.00  0.00
ATOM   4863  H2  WAT  1107      33.781   3.083  36.686  1.00  0.00
ATOM   4864  O   WAT  1108      20.862   3.555   0.324  1.00  0.00
ATOM   4865  H1  WAT  1108      20.283   3.437   1.106  1.00  0.00
ATOM   4866  H2  WAT  1108      20.224   3.317  -0.390  1.00  0.00
ATOM   4867  O   WAT  1109       6.956  39.184   2.859  1.00  0.00
ATOM   4868  H1  WAT  1109       6.735  40.129   3.038  1.00  0.00
ATOM   4869  H2  WAT  1109       7.920  39.203   2.958  1.00  0.00
ATOM   4870  O   WAT  1110      37.981  -8.817  35.152  1.00  0.00
ATOM   4871  H1  WAT  1110      38.320  -7.913  35.293  1.00  0.00
ATOM   4872  H2  WAT  1110      38.723  -9.194  34.626  1.00  0.00
ATOM   4873  O   WAT  1111      32.355  10.657 -11.290  1.00  0.00
ATOM   4874  H1  WAT  1111      31.701  10.163 -11.854  1.00  0.00
ATOM   4875  H2  WAT  1111      32.160  10.242 -10.430  1.00  0.00
ATOM   4876  O   WAT  1112      24.194  -6.164  10.173  1.00  0.00
ATOM   4877  H1  WAT  1112      23.284  -6.024  10.536  1.00  0.00
ATOM   4878  H2  WAT  1112      24.024  -5.872   9.244  1.00  0.00
ATOM   4879  O   WAT  1113      37.148   4.269 -14.134  1.00  0.00
ATOM   4880  H1  WAT  1113      38.099   4.445 -14.346  1.00  0.00
ATOM   4881  H2  WAT  1113      37.268   3.413 -13.650  1.00  0.00
ATOM   4882  O   WAT  1114      39.985  24.353   0.061  1.00  0.00
ATOM   4883  H1  WAT  1114      40.280  23.831   0.823  1.00  0.00
ATOM   4884  H2  WAT  1114      39.093  23.982  -0.094  1.00  0.00
ATOM   4885  O   WAT  1115      18.619  34.402  -7.047  1.00  0.00
ATOM   4886  H1  WAT  1115      19.152  33.892  -7.709  1.00  0.00
ATOM   4887  H2  WAT  1115      18.763  33.819  -6.263  1.00  0.00
ATOM   4888  O   WAT  1116       7.477  -3.267  17.321  1.00  0.00
ATOM   4889  H1  WAT  1116       7.418  -3.755  16.469  1.00  0.00
ATOM   4890  H2  WAT  1116       6.532  -3.110  17.500  1.00  0.00
ATOM   4891  O   WAT  1117      14.260  -7.333  28.938  1.00  0.00
ATOM   4892  H1  WAT  1117      14.964  -6.780  29.305  1.00  0.00
ATOM   4893  H2  WAT  1117      14.785  -8.075  28.556  1.00  0.00
ATOM   4894  O   WAT  1118     -28.137  12.486   7.499  1.00  0.00
ATOM   4895  H1  WAT  1118     -28.224  11.501   7.543  1.00  0.00
ATOM   4896  H2  WAT  1118     -28.213  12.685   8.461  1.00  0.00
ATOM   4897  O   WAT  1119      33.632  -9.638  32.568  1.00  0.00
ATOM   4898  H1  WAT  1119      33.676 -10.622  32.530  1.00  0.00
ATOM   4899  H2  WAT  1119      32.682  -9.520  32.777  1.00  0.00
ATOM   4900  O   WAT  1120      11.409 -10.553  35.840  1.00  0.00
ATOM   4901  H1  WAT  1120      10.930 -11.180  35.233  1.00  0.00
ATOM   4902  H2  WAT  1120      11.792 -11.219  36.458  1.00  0.00
ATOM   4903  O   WAT  1121      33.084  -0.459  27.944  1.00  0.00
ATOM   4904  H1  WAT  1121      33.555  -1.321  28.014  1.00  0.00
ATOM   4905  H2  WAT  1121      32.224  -0.716  28.356  1.00  0.00
ATOM   4906  O   WAT  1122      27.088   1.667  -0.707  1.00  0.00
ATOM   4907  H1  WAT  1122      26.490   1.808   0.060  1.00  0.00
ATOM   4908  H2  WAT  1122      26.671   0.838  -1.063  1.00  0.00
ATOM   4909  O   WAT  1123      18.160 -11.437  10.910  1.00  0.00
ATOM   4910  H1  WAT  1123      17.963 -10.841  10.156  1.00  0.00
ATOM   4911  H2  WAT  1123      17.300 -11.409  11.384  1.00  0.00
ATOM   4912  O   WAT  1124      37.159  33.859 -10.987  1.00  0.00
ATOM   4913  H1  WAT  1124      37.212  33.853 -11.978  1.00  0.00
ATOM   4914  H2  WAT  1124      37.602  34.709 -10.807  1.00  0.00
ATOM   4915  O   WAT  1125      38.506  -6.665   1.555  1.00  0.00
ATOM   4916  H1  WAT  1125      39.392  -6.901   1.903  1.00  0.00
ATOM   4917  H2  WAT  1125      37.952  -6.892   2.336  1.00  0.00
ATOM   4918  O   WAT  1126      21.250  36.375   8.727  1.00  0.00
ATOM   4919  H1  WAT  1126      20.453  36.902   8.934  1.00  0.00
ATOM   4920  H2  WAT  1126      21.942  37.072   8.782  1.00  0.00
ATOM   4921  O   WAT  1127       7.343  32.452 -13.605  1.00  0.00
ATOM   4922  H1  WAT  1127       6.979  33.215 -13.129  1.00  0.00
ATOM   4923  H2  WAT  1127       8.136  32.858 -14.025  1.00  0.00
ATOM   4924  O   WAT  1128     -19.110  29.958 -17.244  1.00  0.00
ATOM   4925  H1  WAT  1128     -19.643  30.504 -16.615  1.00  0.00
ATOM   4926  H2  WAT  1128     -19.124  30.549 -18.022  1.00  0.00
ATOM   4927  O   WAT  1129      30.420 -16.045 -23.406  1.00  0.00
ATOM   4928  H1  WAT  1129      30.428 -16.967 -23.081  1.00  0.00
ATOM   4929  H2  WAT  1129      29.650 -15.688 -22.932  1.00  0.00
ATOM   4930  O   WAT  1130      19.479  -8.514  21.570  1.00  0.00
ATOM   4931  H1  WAT  1130      18.551  -8.518  21.890  1.00  0.00
ATOM   4932  H2  WAT  1130      19.311  -8.318  20.617  1.00  0.00
ATOM   4933  O   WAT  1131      25.517  -7.341  21.693  1.00  0.00
ATOM   4934  H1  WAT  1131      25.854  -8.139  22.132  1.00  0.00
ATOM   4935  H2  WAT  1131      25.331  -6.766  22.463  1.00  0.00
ATOM   4936  O   WAT  1132      31.549   7.429 -25.936  1.00  0.00
ATOM   4937  H1  WAT  1132      30.911   7.209 -26.626  1.00  0.00
ATOM   4938  H2  WAT  1132      31.763   8.359 -26.149  1.00  0.00
ATOM   4939  O   WAT  1133       5.985 -15.004  10.960  1.00  0.00
ATOM   4940  H1  WAT  1133       6.351 -14.365  10.326  1.00  0.00
ATOM   4941  H2  WAT  1133       5.027 -14.873  10.826  1.00  0.00
ATOM   4942  O   WAT  1134      40.407  -3.503  -8.582  1.00  0.00
ATOM   4943  H1  WAT  1134      40.566  -4.438  -8.325  1.00  0.00
ATOM   4944  H2  WAT  1134      40.409  -3.607  -9.561  1.00  0.00
ATOM   4945  O   WAT  1135      13.845  -5.426 -23.585  1.00  0.00
ATOM   4946  H1  WAT  1135      13.006  -5.104 -23.171  1.00  0.00
ATOM   4947  H2  WAT  1135      13.765  -6.382 -23.359  1.00  0.00
ATOM   4948  O   WAT  1136      26.006   8.766  16.730  1.00  0.00
ATOM   4949  H1  WAT  1136      25.557   8.879  17.596  1.00  0.00
ATOM   4950  H2  WAT  1136      25.907   9.677  16.371  1.00  0.00
ATOM   4951  O   WAT  1137      39.019  36.576  -3.645  1.00  0.00
ATOM   4952  H1  WAT  1137      38.217  36.219  -3.184  1.00  0.00
ATOM   4953  H2  WAT  1137      39.008  36.018  -4.441  1.00  0.00
ATOM   4954  O   WAT  1138       6.318  -4.592  12.169  1.00  0.00
ATOM   4955  H1  WAT  1138       6.996  -4.106  11.660  1.00  0.00
ATOM   4956  H2  WAT  1138       6.592  -5.518  11.992  1.00  0.00
ATOM   4957  O   WAT  1139      16.785  10.089  -9.111  1.00  0.00
ATOM   4958  H1  WAT  1139      16.682   9.770 -10.035  1.00  0.00
ATOM   4959  H2  WAT  1139      16.629   9.268  -8.618  1.00  0.00
ATOM   4960  O   WAT  1140       9.109 -20.518  -0.255  1.00  0.00
ATOM   4961  H1  WAT  1140       8.402 -20.837  -0.845  1.00  0.00
ATOM   4962  H2  WAT  1140       9.725 -21.277  -0.294  1.00  0.00
ATOM   4963  O   WAT  1141      23.994   1.860  12.560  1.00  0.00
ATOM   4964  H1  WAT  1141      23.520   2.394  11.874  1.00  0.00
ATOM   4965  H2  WAT  1141      23.328   1.176  12.735  1.00  0.00
ATOM   4966  O   WAT  1142      14.655  10.206  18.353  1.00  0.00
ATOM   4967  H1  WAT  1142      14.999  10.699  17.576  1.00  0.00
ATOM   4968  H2  WAT  1142      14.650  10.924  19.020  1.00  0.00
ATOM   4969  O   WAT  1143      10.927 -17.397  24.235  1.00  0.00
ATOM   4970  H1  WAT  1143      11.862 -17.420  23.975  1.00  0.00
ATOM   4971  H2  WAT  1143      10.484 -17.275  23.378  1.00  0.00
ATOM   4972  O   WAT  1144      11.989  20.718  40.099  1.00  0.00
ATOM   4973  H1  WAT  1144      12.144  20.127  39.326  1.00  0.00
ATOM   4974  H2  WAT  1144      12.198  20.064  40.822  1.00  0.00
ATOM   4975  O   WAT  1145      36.709  -2.032   5.600  1.00  0.00
ATOM   4976  H1  WAT  1145      37.383  -1.402   5.986  1.00  0.00
ATOM   4977  H2  WAT  1145      36.083  -1.329   5.262  1.00  0.00
ATOM   4978  O   WAT  1146     -19.254  33.363  -1.396  1.00  0.00
ATOM   4979  H1  WAT  1146     -18.936  32.625  -1.959  1.00  0.00
ATOM   4980  H2  WAT  1146     -18.435  33.568  -0.899  1.00  0.00
ATOM   4981  O   WAT  1147      16.855 -18.371  35.974  1.00  0.00
ATOM   4982  H1  WAT  1147      16.791 -19.311  36.199  1.00  0.00
ATOM   4983  H2  WAT  1147      17.826 -18.221  36.070  1.00  0.00
ATOM   4984  O   WAT  1148     -28.451  -9.480  15.822  1.00  0.00
ATOM   4985  H1  WAT  1148     -28.780  -8.879  16.540  1.00  0.00
ATOM   4986  H2  WAT  1148     -28.150 -10.230  16.363  1.00  0.00
ATOM   4987  O   WAT  1149      26.495  -2.136  21.955  1.00  0.00
ATOM   4988  H1  WAT  1149      26.501  -1.319  21.417  1.00  0.00
ATOM   4989  H2  WAT  1149      25.668  -2.558  21.623  1.00  0.00
ATOM   4990  O   WAT  1150      32.699  -5.519 -14.098  1.00  0.00
ATOM   4991  H1  WAT  1150      33.537  -5.040 -14.255  1.00  0.00
ATOM   4992  H2  WAT  1150      32.084  -4.971 -14.633  1.00  0.00
ATOM   4993  O   WAT  1151      39.177  15.336  11.627  1.00  0.00
ATOM   4994  H1  WAT  1151      39.430  14.587  12.201  1.00  0.00
ATOM   4995  H2  WAT  1151      39.845  15.999  11.882  1.00  0.00
ATOM   4996  O   WAT  1152      35.102  32.296  -3.742  1.00  0.00
ATOM   4997  H1  WAT  1152      35.986  32.467  -3.319  1.00  0.00
ATOM   4998  H2  WAT  1152      34.536  32.764  -3.098  1.00  0.00
ATOM   4999  O   WAT  1153     -29.534  -3.887  26.181  1.00  0.00
ATOM   5000  H1  WAT  1153     -30.391  -3.435  26.347  1.00  0.00
ATOM   5001  H2  WAT  1153     -29.153  -3.273  25.513  1.00  0.00
ATOM   5002  O   WAT  1154      17.338  -1.842   1.317  1.00  0.00
ATOM   5003  H1  WAT  1154      18.066  -1.321   0.929  1.00  0.00
ATOM   5004  H2  WAT  1154      17.742  -2.113   2.168  1.00  0.00
ATOM   5005  O   WAT  1155      13.646  -4.451   2.434  1.00  0.00
ATOM   5006  H1  WAT  1155      14.158  -3.796   2.952  1.00  0.00
ATOM   5007  H2  WAT  1155      12.900  -4.600   3.051  1.00  0.00
ATOM   5008  O   WAT  1156      25.718   1.277  -8.526  1.00  0.00
ATOM   5009  H1  WAT  1156      26.334   1.036  -7.788  1.00  0.00
ATOM   5010  H2  WAT  1156      25.595   2.229  -8.329  1.00  0.00
ATOM   5011  O   WAT  1157      25.042  27.373 -16.910  1.00  0.00
ATOM   5012  H1  WAT  1157      25.769  26.719 -16.773  1.00  0.00
ATOM   5013  H2  WAT  1157      25.325  27.774 -17.750  1.00  0.00
ATOM   5014  O   WAT  1158      21.698 -14.248 -10.592  1.00  0.00
ATOM   5015  H1  WAT  1158      21.608 -13.302 -10.868  1.00  0.00
ATOM   5016  H2  WAT  1158      20.935 -14.290  -9.966  1.00  0.00
ATOM   5017  O   WAT  1159       6.282 -14.974  -4.766  1.00  0.00
ATOM   5018  H1  WAT  1159       6.931 -14.383  -5.181  1.00  0.00
ATOM   5019  H2  WAT  1159       5.530 -14.377  -4.615  1.00  0.00
ATOM   5020  O   WAT  1160      19.667  17.909  -1.746  1.00  0.00
ATOM   5021  H1  WAT  1160      19.108  18.683  -1.997  1.00  0.00
ATOM   5022  H2  WAT  1160      19.049  17.178  -1.965  1.00  0.00
ATOM   5023  O   WAT  1161       4.745  -7.147   0.659  1.00  0.00
ATOM   5024  H1  WAT  1161       4.246  -7.006   1.494  1.00  0.00
ATOM   5025  H2  WAT  1161       4.054  -7.596   0.125  1.00  0.00
ATOM   5026  O   WAT  1162      30.357  17.671  -2.044  1.00  0.00
ATOM   5027  H1  WAT  1162      30.374  17.608  -3.038  1.00  0.00
ATOM   5028  H2  WAT  1162      31.294  17.935  -1.905  1.00  0.00
ATOM   5029  O   WAT  1163      18.923  -6.997  -5.650  1.00  0.00
ATOM   5030  H1  WAT  1163      18.178  -7.361  -5.122  1.00  0.00
ATOM   5031  H2  WAT  1163      18.444  -6.764  -6.476  1.00  0.00
ATOM   5032  O   WAT  1164     -26.589   4.779 -12.385  1.00  0.00
ATOM   5033  H1  WAT  1164     -27.010   4.128 -11.780  1.00  0.00
ATOM   5034  H2  WAT  1164     -27.368   5.191 -12.793  1.00  0.00
ATOM   5035  O   WAT  1165      29.047   3.057  -2.262  1.00  0.00
ATOM   5036  H1  WAT  1165      28.719   2.968  -3.195  1.00  0.00
ATOM   5037  H2  WAT  1165      28.271   2.666  -1.795  1.00  0.00
ATOM   5038  O   WAT  1166       8.611  14.768  32.376  1.00  0.00
ATOM   5039  H1  WAT  1166       8.325  13.899  32.014  1.00  0.00
ATOM   5040  H2  WAT  1166       7.760  15.046  32.800  1.00  0.00
ATOM   5041  O   WAT  1167     -26.571  -0.065  -9.967  1.00  0.00
ATOM   5042  H1  WAT  1167     -26.485  -0.315  -9.036  1.00  0.00
ATOM   5043  H2  WAT  1167     -27.494   0.234 -10.021  1.00  0.00
ATOM   5044  O   WAT  1168       8.878 -16.319  25.870  1.00  0.00
ATOM   5045  H1  WAT  1168       8.274 -17.105  25.838  1.00  0.00
ATOM   5046  H2  WAT  1168       9.607 -16.683  25.306  1.00  0.00
ATOM   5047  O   WAT  1169       5.376   2.611  38.941  1.00  0.00
ATOM   5048  H1  WAT  1169       4.636   2.129  38.510  1.00  0.00
ATOM   5049  H2  WAT  1169       5.289   3.475  38.448  1.00  0.00
ATOM   5050  O   WAT  1170      29.953 -11.068  11.156  1.00  0.00
ATOM   5051  H1  WAT  1170      30.506 -11.693  10.628  1.00  0.00
ATOM   5052  H2  WAT  1170      30.048 -11.504  12.039  1.00  0.00
ATOM   5053  O   WAT  1171     -27.548 -20.311  13.608  1.00  0.00
ATOM   5054  H1  WAT  1171     -27.491 -19.819  14.446  1.00  0.00
ATOM   5055  H2  WAT  1171     -28.306 -19.852  13.182  1.00  0.00
ATOM   5056  O   WAT  1172      20.154 -11.280  27.725  1.00  0.00
ATOM   5057  H1  WAT  1172      19.616 -10.480  27.548  1.00  0.00
ATOM   5058  H2  WAT  1172      21.025 -10.973  27.384  1.00  0.00
ATOM   5059  O   WAT  1173      13.709  28.664   6.761  1.00  0.00
ATOM   5060  H1  WAT  1173      14.524  29.225   6.874  1.00  0.00
ATOM   5061  H2  WAT  1173      14.026  28.117   5.997  1.00  0.00
ATOM   5062  O   WAT  1174      24.998  21.061 -19.594  1.00  0.00
ATOM   5063  H1  WAT  1174      25.460  21.508 -20.344  1.00  0.00
ATOM   5064  H2  WAT  1174      25.698  20.398 -19.369  1.00  0.00
ATOM   5065  O   WAT  1175      16.477  -3.478  19.310  1.00  0.00
ATOM   5066  H1  WAT  1175      17.350  -3.175  19.005  1.00  0.00
ATOM   5067  H2  WAT  1175      15.939  -3.307  18.499  1.00  0.00
ATOM   5068  O   WAT  1176     -20.920 -16.913  11.004  1.00  0.00
ATOM   5069  H1  WAT  1176     -21.427 -17.642  11.441  1.00  0.00
ATOM   5070  H2  WAT  1176     -21.453 -16.843  10.175  1.00  0.00
ATOM   5071  O   WAT  1177      21.146 -19.450  17.142  1.00  0.00
ATOM   5072  H1  WAT  1177      21.753 -19.672  17.879  1.00  0.00
ATOM   5073  H2  WAT  1177      21.034 -18.491  17.280  1.00  0.00
ATOM   5074  O   WAT  1178      37.875   7.927  26.951  1.00  0.00
ATOM   5075  H1  WAT  1178      38.007   7.271  26.216  1.00  0.00
ATOM   5076  H2  WAT  1178      38.635   8.520  26.769  1.00  0.00
ATOM   5077  O   WAT  1179      29.212  13.019  -9.222  1.00  0.00
ATOM   5078  H1  WAT  1179      28.674  13.643  -9.768  1.00  0.00
ATOM   5079  H2  WAT  1179      29.441  13.612  -8.476  1.00  0.00
ATOM   5080  O   WAT  1180      -8.576  -0.692  23.035  1.00  0.00
ATOM   5081  H1  WAT  1180      -9.548  -0.642  22.854  1.00  0.00
ATOM   5082  H2  WAT  1180      -8.612  -0.857  24.004  1.00  0.00
ATOM   5083  O   WAT  1181      13.911 -16.485 -19.047  1.00  0.00
ATOM   5084  H1  WAT  1181      13.215 -15.785 -18.988  1.00  0.00
ATOM   5085  H2  WAT  1181      14.206 -16.478 -18.108  1.00  0.00
ATOM   5086  O   WAT  1182      38.617  33.878  -4.100  1.00  0.00
ATOM   5087  H1  WAT  1182      38.385  33.496  -3.228  1.00  0.00
ATOM   5088  H2  WAT  1182      39.568  34.015  -4.010  1.00  0.00
ATOM   5089  O   WAT  1183      34.661  14.914   1.606  1.00  0.00
ATOM   5090  H1  WAT  1183      34.966  14.001   1.767  1.00  0.00
ATOM   5091  H2  WAT  1183      34.720  15.287   2.511  1.00  0.00
ATOM   5092  O   WAT  1184     -25.561  28.481  -5.721  1.00  0.00
ATOM   5093  H1  WAT  1184     -26.533  28.641  -5.679  1.00  0.00
ATOM   5094  H2  WAT  1184     -25.574  27.610  -6.182  1.00  0.00
ATOM   5095  O   WAT  1185     -28.785  -9.588  24.203  1.00  0.00
ATOM   5096  H1  WAT  1185     -29.190  -9.769  23.332  1.00  0.00
ATOM   5097  H2  WAT  1185     -27.932 -10.059  24.104  1.00  0.00
ATOM   5098  O   WAT  1186      20.526 -15.161 -19.591  1.00  0.00
ATOM   5099  H1  WAT  1186      20.254 -15.725 -20.333  1.00  0.00
ATOM   5100  H2  WAT  1186      20.275 -14.277 -19.890  1.00  0.00
ATOM   5101  O   WAT  1187      30.736  -5.515   1.395  1.00  0.00
ATOM   5102  H1  WAT  1187      30.854  -6.011   0.569  1.00  0.00
ATOM   5103  H2  WAT  1187      31.277  -4.719   1.206  1.00  0.00
ATOM   5104  O   WAT  1188      19.962  -6.804   0.906  1.00  0.00
ATOM   5105  H1  WAT  1188      20.495  -7.153   1.663  1.00  0.00
ATOM   5106  H2  WAT  1188      20.682  -6.333   0.420  1.00  0.00
ATOM   5107  O   WAT  1189      17.349  36.151 -25.840  1.00  0.00
ATOM   5108  H1  WAT  1189      16.712  35.850 -25.154  1.00  0.00
ATOM   5109  H2  WAT  1189      17.248  37.116 -25.769  1.00  0.00
ATOM   5110  O   WAT  1190      22.114  33.863  37.573  1.00  0.00
ATOM   5111  H1  WAT  1190      22.579  33.004  37.680  1.00  0.00
ATOM   5112  H2  WAT  1190      22.307  34.040  36.623  1.00  0.00
ATOM   5113  O   WAT  1191      17.596 -11.047  19.646  1.00  0.00
ATOM   5114  H1  WAT  1191      16.754 -11.297  20.077  1.00  0.00
ATOM   5115  H2  WAT  1191      18.107 -11.867  19.734  1.00  0.00
ATOM   5116  O   WAT  1192      34.929   3.930 -23.483  1.00  0.00
ATOM   5117  H1  WAT  1192      34.464   3.222 -22.986  1.00  0.00
ATOM   5118  H2  WAT  1192      34.155   4.479 -23.746  1.00  0.00
ATOM   5119  O   WAT  1193       3.912  -6.465   3.411  1.00  0.00
ATOM   5120  H1  WAT  1193       3.468  -5.867   4.056  1.00  0.00
ATOM   5121  H2  WAT  1193       4.811  -6.083   3.416  1.00  0.00
ATOM   5122  O   WAT  1194      23.386 -16.260  -2.479  1.00  0.00
ATOM   5123  H1  WAT  1194      22.401 -16.194  -2.594  1.00  0.00
ATOM   5124  H2  WAT  1194      23.523 -17.102  -2.976  1.00  0.00
ATOM   5125  O   WAT  1195      11.272  41.153   2.567  1.00  0.00
ATOM   5126  H1  WAT  1195      11.804  41.933   2.817  1.00  0.00
ATOM   5127  H2  WAT  1195      11.468  40.548   3.311  1.00  0.00
ATOM   5128  O   WAT  1196      14.307  25.735  -8.519  1.00  0.00
ATOM   5129  H1  WAT  1196      14.684  25.143  -7.832  1.00  0.00
ATOM   5130  H2  WAT  1196      14.953  26.476  -8.477  1.00  0.00
ATOM   5131  O   WAT  1197      39.269   8.267   0.293  1.00  0.00
ATOM   5132  H1  WAT  1197      39.428   8.601  -0.610  1.00  0.00
ATOM   5133  H2  WAT  1197      39.701   7.388   0.248  1.00  0.00
ATOM   5134  O   WAT  1198      18.867 -14.173  18.225  1.00  0.00
ATOM   5135  H1  WAT  1198      19.391 -13.358  18.435  1.00  0.00
ATOM   5136  H2  WAT  1198      19.223 -14.770  18.922  1.00  0.00
ATOM   5137  O   WAT  1199      30.087  28.026  -1.691  1.00  0.00
ATOM   5138  H1  WAT  1199      29.858  28.286  -0.771  1.00  0.00
ATOM   5139  H2  WAT  1199      30.678  27.260  -1.499  1.00  0.00
ATOM   5140  O   WAT  1200       9.387  27.619  13.639  1.00  0.00
ATOM   5141  H1  WAT  1200       9.313  28.472  13.148  1.00  0.00
ATOM   5142  H2  WAT  1200       9.531  27.974  14.546  1.00  0.00
ATOM   5143  O   WAT  1201      23.603  29.361  14.818  1.00  0.00
ATOM   5144  H1  WAT  1201      23.400  30.325  14.896  1.00  0.00
ATOM   5145  H2  WAT  1201      22.740  29.051  14.467  1.00  0.00
ATOM   5146  O   WAT  1202      12.710 -14.985   3.700  1.00  0.00
ATOM   5147  H1  WAT  1202      12.897 -15.868   3.306  1.00  0.00
ATOM   5148  H2  WAT  1202      11.805 -15.140   4.031  1.00  0.00
ATOM   5149  O   WAT  1203      22.409   9.273  26.638  1.00  0.00
ATOM   5150  H1  WAT  1203      22.816  10.162  26.769  1.00  0.00
ATOM   5151  H2  WAT  1203      21.726   9.308  27.346  1.00  0.00
ATOM   5152  O   WAT  1204      20.574  -6.041  -3.187  1.00  0.00
ATOM   5153  H1  WAT  1204      19.972  -6.584  -2.641  1.00  0.00
ATOM   5154  H2  WAT  1204      20.227  -6.233  -4.081  1.00  0.00
ATOM   5155  O   WAT  1205      17.698 -12.280  34.797  1.00  0.00
ATOM   5156  H1  WAT  1205      18.625 -12.062  34.549  1.00  0.00
ATOM   5157  H2  WAT  1205      17.513 -11.502  35.380  1.00  0.00
ATOM   5158  O   WAT  1206      28.144  19.360  26.160  1.00  0.00
ATOM   5159  H1  WAT  1206      28.193  19.969  26.951  1.00  0.00
ATOM   5160  H2  WAT  1206      27.231  19.009  26.321  1.00  0.00
ATOM   5161  O   WAT  1207      -0.074  19.345  24.833  1.00  0.00
ATOM   5162  H1  WAT  1207       0.286  18.884  25.628  1.00  0.00
ATOM   5163  H2  WAT  1207      -0.414  20.158  25.290  1.00  0.00
ATOM   5164  O   WAT  1208      26.701 -14.728  12.273  1.00  0.00
ATOM   5165  H1  WAT  1208      26.218 -14.421  11.480  1.00  0.00
ATOM   5166  H2  WAT  1208      27.537 -15.037  11.861  1.00  0.00
ATOM   5167  O   WAT  1209      29.291  33.682   6.125  1.00  0.00
ATOM   5168  H1  WAT  1209      29.563  33.946   7.046  1.00  0.00
ATOM   5169  H2  WAT  1209      30.141  33.244   5.858  1.00  0.00
ATOM   5170  O   WAT  1210      42.412  26.722   2.120  1.00  0.00
ATOM   5171  H1  WAT  1210      41.606  26.667   1.576  1.00  0.00
ATOM   5172  H2  WAT  1210      42.171  26.110   2.858  1.00  0.00
ATOM   5173  O   WAT  1211      19.958  -4.215  23.717  1.00  0.00
ATOM   5174  H1  WAT  1211      20.018  -4.048  24.683  1.00  0.00
ATOM   5175  H2  WAT  1211      20.203  -5.161  23.693  1.00  0.00
ATOM   5176  O   WAT  1212      15.087   0.453  -0.389  1.00  0.00
ATOM   5177  H1  WAT  1212      14.769  -0.013   0.415  1.00  0.00
ATOM   5178  H2  WAT  1212      14.294   0.403  -0.948  1.00  0.00
ATOM   5179  O   WAT  1213      41.644   7.538   2.647  1.00  0.00
ATOM   5180  H1  WAT  1213      41.118   8.300   2.329  1.00  0.00
ATOM   5181  H2  WAT  1213      41.356   7.505   3.581  1.00  0.00
ATOM   5182  O   WAT  1214      24.364  38.462 -17.631  1.00  0.00
ATOM   5183  H1  WAT  1214      24.999  39.188 -17.821  1.00  0.00
ATOM   5184  H2  WAT  1214      23.536  38.959 -17.531  1.00  0.00
ATOM   5185  O   WAT  1215       1.884   6.711 -23.393  1.00  0.00
ATOM   5186  H1  WAT  1215       1.003   6.887 -22.997  1.00  0.00
ATOM   5187  H2  WAT  1215       1.835   5.732 -23.476  1.00  0.00
ATOM   5188  O   WAT  1216       7.885  -8.689 -10.714  1.00  0.00
ATOM   5189  H1  WAT  1216       8.719  -8.709 -10.185  1.00  0.00
ATOM   5190  H2  WAT  1216       8.185  -8.142 -11.467  1.00  0.00
ATOM   5191  O   WAT  1217      25.412   3.779  39.166  1.00  0.00
ATOM   5192  H1  WAT  1217      25.580   3.328  38.314  1.00  0.00
ATOM   5193  H2  WAT  1217      26.160   4.406  39.188  1.00  0.00
ATOM   5194  O   WAT  1218      15.015  -3.878  -6.854  1.00  0.00
ATOM   5195  H1  WAT  1218      14.529  -4.212  -7.628  1.00  0.00
ATOM   5196  H2  WAT  1218      14.574  -3.013  -6.716  1.00  0.00
ATOM   5197  O   WAT  1219      30.665   5.589  -6.655  1.00  0.00
ATOM   5198  H1  WAT  1219      30.170   6.084  -5.977  1.00  0.00
ATOM   5199  H2  WAT  1219      30.127   4.763  -6.694  1.00  0.00
ATOM   5200  O   WAT  1220     -21.834  21.863  -8.762  1.00  0.00
ATOM   5201  H1  WAT  1220     -22.057  21.088  -9.300  1.00  0.00
ATOM   5202  H2  WAT  1220     -22.715  22.111  -8.411  1.00  0.00
ATOM   5203  O   WAT  1221      34.359  -5.669  22.698  1.00  0.00
ATOM   5204  H1  WAT  1221      34.675  -4.836  22.286  1.00  0.00
ATOM   5205  H2  WAT  1221      34.945  -5.690  23.490  1.00  0.00
ATOM   5206  O   WAT  1222      26.097   7.171 -12.015  1.00  0.00
ATOM   5207  H1  WAT  1222      26.800   7.690 -11.573  1.00  0.00
ATOM   5208  H2  WAT  1222      26.437   7.136 -12.928  1.00  0.00
ATOM   5209  O   WAT  1223      31.931  30.843 -23.912  1.00  0.00
ATOM   5210  H1  WAT  1223      32.114  31.192 -24.822  1.00  0.00
ATOM   5211  H2  WAT  1223      31.015  30.520 -24.046  1.00  0.00
ATOM   5212  O   WAT  1224      30.249  -9.598  21.965  1.00  0.00
ATOM   5213  H1  WAT  1224      30.340  -9.902  22.905  1.00  0.00
ATOM   5214  H2  WAT  1224      31.047  -9.035  21.909  1.00  0.00
ATOM   5215  O   WAT  1225      28.632  -9.325  27.776  1.00  0.00
ATOM   5216  H1  WAT  1225      27.970  -9.583  28.466  1.00  0.00
ATOM   5217  H2  WAT  1225      29.452  -9.612  28.264  1.00  0.00
ATOM   5218  O   WAT  1226      10.540   2.331 -19.440  1.00  0.00
ATOM   5219  H1  WAT  1226      10.161   2.844 -20.175  1.00  0.00
ATOM   5220  H2  WAT  1226      10.850   1.533 -19.924  1.00  0.00
ATOM   5221  O   WAT  1227      21.534  39.520 -13.590  1.00  0.00
ATOM   5222  H1  WAT  1227      21.825  40.067 -12.826  1.00  0.00
ATOM   5223  H2  WAT  1227      21.217  38.718 -13.094  1.00  0.00
ATOM   5224  O   WAT  1228      31.429  -9.857  -5.636  1.00  0.00
ATOM   5225  H1  WAT  1228      31.419 -10.042  -6.594  1.00  0.00
ATOM   5226  H2  WAT  1228      32.179  -9.246  -5.560  1.00  0.00
ATOM   5227  O   WAT  1229      24.351  -8.432 -12.190  1.00  0.00
ATOM   5228  H1  WAT  1229      25.024  -7.783 -12.456  1.00  0.00
ATOM   5229  H2  WAT  1229      24.811  -9.268 -12.429  1.00  0.00
ATOM   5230  O   WAT  1230      31.643  -3.014 -12.459  1.00  0.00
ATOM   5231  H1  WAT  1230      32.502  -2.700 -12.052  1.00  0.00
ATOM   5232  H2  WAT  1230      31.686  -3.948 -12.129  1.00  0.00
ATOM   5233  O   WAT  1231      15.662   3.505  38.415  1.00  0.00
ATOM   5234  H1  WAT  1231      14.746   3.837  38.374  1.00  0.00
ATOM   5235  H2  WAT  1231      15.534   2.659  38.885  1.00  0.00
ATOM   5236  O   WAT  1232      36.925  36.714 -19.834  1.00  0.00
ATOM   5237  H1  WAT  1232      36.073  36.970 -19.424  1.00  0.00
ATOM   5238  H2  WAT  1232      36.608  36.339 -20.684  1.00  0.00
ATOM   5239  O   WAT  1233       1.279   4.542  30.514  1.00  0.00
ATOM   5240  H1  WAT  1233       1.922   4.238  31.210  1.00  0.00
ATOM   5241  H2  WAT  1233       1.615   4.016  29.758  1.00  0.00
ATOM   5242  O   WAT  1234      23.779  11.493 -17.614  1.00  0.00
ATOM   5243  H1  WAT  1234      24.182  11.478 -16.722  1.00  0.00
ATOM   5244  H2  WAT  1234      23.491  12.434 -17.658  1.00  0.00
ATOM   5245  O   WAT  1235     -23.130 -17.203  26.768  1.00  0.00
ATOM   5246  H1  WAT  1235     -23.173 -16.550  27.504  1.00  0.00
ATOM   5247  H2  WAT  1235     -22.988 -16.607  26.014  1.00  0.00
ATOM   5248  O   WAT  1236      28.272  17.641 -11.952  1.00  0.00
ATOM   5249  H1  WAT  1236      29.024  18.158 -11.615  1.00  0.00
ATOM   5250  H2  WAT  1236      28.748  16.968 -12.498  1.00  0.00
ATOM   5251  O   WAT  1237      21.208   8.131 -13.964  1.00  0.00
ATOM   5252  H1  WAT  1237      21.948   7.646 -14.379  1.00  0.00
ATOM   5253  H2  WAT  1237      20.490   7.463 -14.073  1.00  0.00
ATOM   5254  O   WAT  1238      11.485  19.083  -8.970  1.00  0.00
ATOM   5255  H1  WAT  1238      11.504  20.021  -8.679  1.00  0.00
ATOM   5256  H2  WAT  1238      10.742  18.744  -8.445  1.00  0.00
ATOM   5257  O   WAT  1239      19.040   8.402  33.883  1.00  0.00
ATOM   5258  H1  WAT  1239      18.545   9.244  33.976  1.00  0.00
ATOM   5259  H2  WAT  1239      19.346   8.304  34.818  1.00  0.00
ATOM   5260  O   WAT  1240      30.307   9.496 -12.389  1.00  0.00
ATOM   5261  H1  WAT  1240      29.574   9.155 -11.839  1.00  0.00
ATOM   5262  H2  WAT  1240      30.328   8.825 -13.100  1.00  0.00
ATOM   5263  O   WAT  1241      30.116   8.760  14.175  1.00  0.00
ATOM   5264  H1  WAT  1241      29.757   8.036  14.721  1.00  0.00
ATOM   5265  H2  WAT  1241      29.289   9.096  13.764  1.00  0.00
ATOM   5266  O   WAT  1242      17.013  -8.524 -14.147  1.00  0.00
ATOM   5267  H1  WAT  1242      16.778  -9.059 -13.359  1.00  0.00
ATOM   5268  H2  WAT  1242      17.978  -8.639 -14.163  1.00  0.00
ATOM   5269  O   WAT  1243      14.032   1.286 -19.080  1.00  0.00
ATOM   5270  H1  WAT  1243      14.858   1.778 -18.863  1.00  0.00
ATOM   5271  H2  WAT  1243      13.486   1.510 -18.304  1.00  0.00
ATOM   5272  O   WAT  1244      21.486 -17.060  32.849  1.00  0.00
ATOM   5273  H1  WAT  1244      20.603 -16.884  33.278  1.00  0.00
ATOM   5274  H2  WAT  1244      21.237 -16.808  31.927  1.00  0.00
ATOM   5275  O   WAT  1245     -15.986 -17.471  -6.111  1.00  0.00
ATOM   5276  H1  WAT  1245     -15.964 -18.157  -6.806  1.00  0.00
ATOM   5277  H2  WAT  1245     -16.562 -17.909  -5.446  1.00  0.00
ATOM   5278  O   WAT  1246      37.923  -9.516  -9.963  1.00  0.00
ATOM   5279  H1  WAT  1246      37.301  -8.857  -9.547  1.00  0.00
ATOM   5280  H2  WAT  1246      37.621 -10.316  -9.485  1.00  0.00
ATOM   5281  O   WAT  1247       7.677 -12.050   1.323  1.00  0.00
ATOM   5282  H1  WAT  1247       6.898 -11.533   1.593  1.00  0.00
ATOM   5283  H2  WAT  1247       7.883 -12.532   2.147  1.00  0.00
ATOM   5284  O   WAT  1248      30.046   2.476 -12.345  1.00  0.00
ATOM   5285  H1  WAT  1248      29.473   2.564 -11.562  1.00  0.00
ATOM   5286  H2  WAT  1248      29.958   3.376 -12.731  1.00  0.00
ATOM   5287  O   WAT  1249       4.757  31.068  27.904  1.00  0.00
ATOM   5288  H1  WAT  1249       4.072  30.498  27.504  1.00  0.00
ATOM   5289  H2  WAT  1249       5.265  30.419  28.423  1.00  0.00
ATOM   5290  O   WAT  1250     -12.174  -6.315  16.728  1.00  0.00
ATOM   5291  H1  WAT  1250     -11.863  -5.682  17.388  1.00  0.00
ATOM   5292  H2  WAT  1250     -12.638  -5.718  16.099  1.00  0.00
ATOM   5293  O   WAT  1251     -12.363  38.176 -13.996  1.00  0.00
ATOM   5294  H1  WAT  1251     -13.269  37.820 -14.127  1.00  0.00
ATOM   5295  H2  WAT  1251     -12.281  38.717 -14.811  1.00  0.00
ATOM   5296  O   WAT  1252       7.756   1.262 -18.995  1.00  0.00
ATOM   5297  H1  WAT  1252       6.988   0.679 -18.845  1.00  0.00
ATOM   5298  H2  WAT  1252       7.574   1.568 -19.909  1.00  0.00
ATOM   5299  O   WAT  1253      21.854  16.121  29.804  1.00  0.00
ATOM   5300  H1  WAT  1253      21.143  15.994  29.155  1.00  0.00
ATOM   5301  H2  WAT  1253      21.762  15.316  30.350  1.00  0.00
ATOM   5302  O   WAT  1254      25.822 -10.669 -13.172  1.00  0.00
ATOM   5303  H1  WAT  1254      25.288 -11.477 -13.287  1.00  0.00
ATOM   5304  H2  WAT  1254      26.059 -10.486 -14.113  1.00  0.00
ATOM   5305  O   WAT  1255      32.579  -1.562  35.683  1.00  0.00
ATOM   5306  H1  WAT  1255      32.796  -2.510  35.746  1.00  0.00
ATOM   5307  H2  WAT  1255      31.862  -1.572  35.017  1.00  0.00
ATOM   5308  O   WAT  1256      34.925  -6.892 -18.161  1.00  0.00
ATOM   5309  H1  WAT  1256      34.751  -7.857 -18.155  1.00  0.00
ATOM   5310  H2  WAT  1256      35.759  -6.902 -17.600  1.00  0.00
ATOM   5311  O   WAT  1257      25.045 -18.894  12.666  1.00  0.00
ATOM   5312  H1  WAT  1257      24.845 -17.983  13.014  1.00  0.00
ATOM   5313  H2  WAT  1257      25.787 -18.631  12.052  1.00  0.00
ATOM   5314  O   WAT  1258      37.322  37.051  -6.602  1.00  0.00
ATOM   5315  H1  WAT  1258      37.414  36.079  -6.527  1.00  0.00
ATOM   5316  H2  WAT  1258      38.241  37.324  -6.735  1.00  0.00
ATOM   5317  O   WAT  1259     -10.458 -19.241 -16.382  1.00  0.00
ATOM   5318  H1  WAT  1259     -11.028 -20.020 -16.250  1.00  0.00
ATOM   5319  H2  WAT  1259     -10.531 -19.110 -17.341  1.00  0.00
ATOM   5320  O   WAT  1260      29.830  24.232  -0.792  1.00  0.00
ATOM   5321  H1  WAT  1260      30.176  23.649  -1.510  1.00  0.00
ATOM   5322  H2  WAT  1260      30.411  25.012  -0.928  1.00  0.00
ATOM   5323  O   WAT  1261     -24.938  -6.859  12.245  1.00  0.00
ATOM   5324  H1  WAT  1261     -24.045  -6.798  12.631  1.00  0.00
ATOM   5325  H2  WAT  1261     -24.790  -6.535  11.346  1.00  0.00
ATOM   5326  O   WAT  1262      12.283  10.959 -16.173  1.00  0.00
ATOM   5327  H1  WAT  1262      12.240   9.967 -16.245  1.00  0.00
ATOM   5328  H2  WAT  1262      12.254  11.182 -17.125  1.00  0.00
ATOM   5329  O   WAT  1263      11.131  31.626   0.176  1.00  0.00
ATOM   5330  H1  WAT  1263      10.598  31.116   0.831  1.00  0.00
ATOM   5331  H2  WAT  1263      11.623  30.878  -0.243  1.00  0.00
ATOM   5332  O   WAT  1264       9.621  29.940 -13.224  1.00  0.00
ATOM   5333  H1  WAT  1264      10.319  29.269 -13.347  1.00  0.00
ATOM   5334  H2  WAT  1264       9.543  30.291 -14.129  1.00  0.00
ATOM   5335  O   WAT  1265      -0.819  27.550  -7.770  1.00  0.00
ATOM   5336  H1  WAT  1265      -0.371  27.742  -8.616  1.00  0.00
ATOM   5337  H2  WAT  1265      -1.633  28.089  -7.868  1.00  0.00
ATOM   5338  O   WAT  1266      10.332 -13.931  26.291  1.00  0.00
ATOM   5339  H1  WAT  1266       9.814 -14.742  26.129  1.00  0.00
ATOM   5340  H2  WAT  1266       9.813 -13.525  27.013  1.00  0.00
ATOM   5341  O   WAT  1267       0.764  40.269  -7.302  1.00  0.00
ATOM   5342  H1  WAT  1267       0.804  41.218  -7.517  1.00  0.00
ATOM   5343  H2  WAT  1267      -0.190  40.201  -7.042  1.00  0.00
ATOM   5344  O   WAT  1268       9.686 -14.769  30.052  1.00  0.00
ATOM   5345  H1  WAT  1268      10.209 -15.580  30.252  1.00  0.00
ATOM   5346  H2  WAT  1268       8.793 -15.088  30.287  1.00  0.00
ATOM   5347  O   WAT  1269      29.388  33.485 -18.035  1.00  0.00
ATOM   5348  H1  WAT  1269      29.927  34.223 -17.694  1.00  0.00
ATOM   5349  H2  WAT  1269      29.019  33.125 -17.206  1.00  0.00
ATOM   5350  O   WAT  1270      14.498  21.851   8.315  1.00  0.00
ATOM   5351  H1  WAT  1270      14.664  22.632   7.729  1.00  0.00
ATOM   5352  H2  WAT  1270      14.448  22.300   9.176  1.00  0.00
ATOM   5353  O   WAT  1271       1.231  25.266   5.248  1.00  0.00
ATOM   5354  H1  WAT  1271       0.965  26.181   5.489  1.00  0.00
ATOM   5355  H2  WAT  1271       1.860  25.468   4.517  1.00  0.00
ATOM   5356  O   WAT  1272     -19.504  15.107 -16.407  1.00  0.00
ATOM   5357  H1  WAT  1272     -19.571  14.733 -17.317  1.00  0.00
ATOM   5358  H2  WAT  1272     -20.421  14.908 -16.090  1.00  0.00
ATOM   5359  O   WAT  1273       3.022  38.534  -9.396  1.00  0.00
ATOM   5360  H1  WAT  1273       2.126  38.119  -9.335  1.00  0.00
ATOM   5361  H2  WAT  1273       3.493  37.924  -8.773  1.00  0.00
ATOM   5362  O   WAT  1274      11.673  38.467  19.731  1.00  0.00
ATOM   5363  H1  WAT  1274      12.037  38.031  20.533  1.00  0.00
ATOM   5364  H2  WAT  1274      11.421  37.679  19.206  1.00  0.00
ATOM   5365  O   WAT  1275      25.972  -0.792  -1.296  1.00  0.00
ATOM   5366  H1  WAT  1275      25.720  -0.893  -2.256  1.00  0.00
ATOM   5367  H2  WAT  1275      26.889  -1.172  -1.357  1.00  0.00
ATOM   5368  O   WAT  1276     -19.216  16.079 -12.000  1.00  0.00
ATOM   5369  H1  WAT  1276     -19.788  15.978 -11.199  1.00  0.00
ATOM   5370  H2  WAT  1276     -18.555  16.707 -11.635  1.00  0.00
ATOM   5371  O   WAT  1277      35.804  -2.700  -9.689  1.00  0.00
ATOM   5372  H1  WAT  1277      36.607  -3.209  -9.868  1.00  0.00
ATOM   5373  H2  WAT  1277      36.135  -2.057  -9.018  1.00  0.00
ATOM   5374  O   WAT  1278      28.102  -7.325  38.230  1.00  0.00
ATOM   5375  H1  WAT  1278      27.590  -6.485  38.265  1.00  0.00
ATOM   5376  H2  WAT  1278      27.402  -7.932  37.895  1.00  0.00
ATOM   5377  O   WAT  1279     -20.842 -11.054  22.647  1.00  0.00
ATOM   5378  H1  WAT  1279     -20.033 -10.552  22.842  1.00  0.00
ATOM   5379  H2  WAT  1279     -21.524 -10.466  23.027  1.00  0.00
ATOM   5380  O   WAT  1280      28.391  -3.488  -6.114  1.00  0.00
ATOM   5381  H1  WAT  1280      28.334  -4.395  -6.463  1.00  0.00
ATOM   5382  H2  WAT  1280      29.263  -3.497  -5.677  1.00  0.00
ATOM   5383  O   WAT  1281       9.989 -10.630   3.842  1.00  0.00
ATOM   5384  H1  WAT  1281      10.040  -9.927   3.157  1.00  0.00
ATOM   5385  H2  WAT  1281      10.951 -10.664   4.091  1.00  0.00
ATOM   5386  O   WAT  1282     -28.391  32.314   7.566  1.00  0.00
ATOM   5387  H1  WAT  1282     -27.837  32.982   7.138  1.00  0.00
ATOM   5388  H2  WAT  1282     -28.051  32.333   8.486  1.00  0.00
ATOM   5389  O   WAT  1283      34.647 -14.263  26.191  1.00  0.00
ATOM   5390  H1  WAT  1283      34.784 -14.771  27.011  1.00  0.00
ATOM   5391  H2  WAT  1283      33.735 -14.494  25.963  1.00  0.00
ATOM   5392  O   WAT  1284      27.465  37.436  27.143  1.00  0.00
ATOM   5393  H1  WAT  1284      27.071  36.688  26.611  1.00  0.00
ATOM   5394  H2  WAT  1284      27.899  36.885  27.837  1.00  0.00
ATOM   5395  O   WAT  1285      17.506   2.366  -7.776  1.00  0.00
ATOM   5396  H1  WAT  1285      17.302   3.174  -7.252  1.00  0.00
ATOM   5397  H2  WAT  1285      18.377   2.134  -7.411  1.00  0.00
ATOM   5398  O   WAT  1286     -17.338  36.670 -17.397  1.00  0.00
ATOM   5399  H1  WAT  1286     -16.465  36.359 -17.066  1.00  0.00
ATOM   5400  H2  WAT  1286     -17.231  37.632 -17.301  1.00  0.00
ATOM   5401  O   WAT  1287      19.146  18.416  -5.315  1.00  0.00
ATOM   5402  H1  WAT  1287      19.770  17.798  -5.750  1.00  0.00
ATOM   5403  H2  WAT  1287      19.772  19.124  -5.042  1.00  0.00
ATOM   5404  O   WAT  1288      29.296 -14.078  27.284  1.00  0.00
ATOM   5405  H1  WAT  1288      28.924 -14.985  27.151  1.00  0.00
ATOM   5406  H2  WAT  1288      29.487 -14.139  28.251  1.00  0.00
ATOM   5407  O   WAT  1289      34.174 -17.999 -15.201  1.00  0.00
ATOM   5408  H1  WAT  1289      33.925 -18.875 -15.593  1.00  0.00
ATOM   5409  H2  WAT  1289      34.997 -18.264 -14.736  1.00  0.00
ATOM   5410  O   WAT  1290       0.226 -15.644  29.941  1.00  0.00
ATOM   5411  H1  WAT  1290       0.328 -15.503  30.899  1.00  0.00
ATOM   5412  H2  WAT  1290      -0.491 -15.032  29.724  1.00  0.00
ATOM   5413  O   WAT  1291      30.415  -2.436 -17.887  1.00  0.00
ATOM   5414  H1  WAT  1291      29.508  -2.121 -18.044  1.00  0.00
ATOM   5415  H2  WAT  1291      30.695  -2.649 -18.798  1.00  0.00
ATOM   5416  O   WAT  1292      24.429  13.925  33.348  1.00  0.00
ATOM   5417  H1  WAT  1292      23.688  14.581  33.283  1.00  0.00
ATOM   5418  H2  WAT  1292      23.989  13.156  32.915  1.00  0.00
ATOM   5419  O   WAT  1293      25.371  16.644  -0.644  1.00  0.00
ATOM   5420  H1  WAT  1293      24.628  16.012  -0.479  1.00  0.00
ATOM   5421  H2  WAT  1293      25.117  16.997  -1.512  1.00  0.00
ATOM   5422  O   WAT  1294      32.561  33.560  26.633  1.00  0.00
ATOM   5423  H1  WAT  1294      33.486  33.208  26.575  1.00  0.00
ATOM   5424  H2  WAT  1294      32.557  33.822  27.582  1.00  0.00
ATOM   5425  O   WAT  1295      10.268  39.246  23.443  1.00  0.00
ATOM   5426  H1  WAT  1295      11.184  38.914  23.366  1.00  0.00
ATOM   5427  H2  WAT  1295      10.053  39.367  22.488  1.00  0.00
ATOM   5428  O   WAT  1296     -25.337   1.159 -12.132  1.00  0.00
ATOM   5429  H1  WAT  1296     -25.333   2.036 -11.696  1.00  0.00
ATOM   5430  H2  WAT  1296     -25.754   0.629 -11.410  1.00  0.00
ATOM   5431  O   WAT  1297      24.471  -6.939  27.220  1.00  0.00
ATOM   5432  H1  WAT  1297      24.667  -7.227  26.292  1.00  0.00
ATOM   5433  H2  WAT  1297      25.337  -7.160  27.625  1.00  0.00
ATOM   5434  O   WAT  1298      21.027 -20.409  35.767  1.00  0.00
ATOM   5435  H1  WAT  1298      20.558 -20.956  36.439  1.00  0.00
ATOM   5436  H2  WAT  1298      20.681 -19.522  35.996  1.00  0.00
ATOM   5437  O   WAT  1299      22.563   8.581  -5.353  1.00  0.00
ATOM   5438  H1  WAT  1299      21.892   8.211  -5.977  1.00  0.00
ATOM   5439  H2  WAT  1299      22.077   8.468  -4.507  1.00  0.00
ATOM   5440  O   WAT  1300      26.337  -7.045 -21.000  1.00  0.00
ATOM   5441  H1  WAT  1300      26.687  -7.169 -21.904  1.00  0.00
ATOM   5442  H2  WAT  1300      27.129  -7.359 -20.482  1.00  0.00
ATOM   5443  O   WAT  1301      31.902   4.241   8.176  1.00  0.00
ATOM   5444  H1  WAT  1301      32.587   3.553   8.379  1.00  0.00
ATOM   5445  H2  WAT  1301      32.483   4.849   7.648  1.00  0.00
ATOM   5446  O   WAT  1302      27.704 -10.327  25.134  1.00  0.00
ATOM   5447  H1  WAT  1302      28.473 -10.936  25.134  1.00  0.00
ATOM   5448  H2  WAT  1302      27.990  -9.710  25.847  1.00  0.00
ATOM   5449  O   WAT  1303      32.851  -0.128  -6.720  1.00  0.00
ATOM   5450  H1  WAT  1303      32.837   0.626  -7.345  1.00  0.00
ATOM   5451  H2  WAT  1303      32.490  -0.837  -7.278  1.00  0.00
ATOM   5452  O   WAT  1304      25.501 -18.247  35.073  1.00  0.00
ATOM   5453  H1  WAT  1304      25.105 -17.705  35.769  1.00  0.00
ATOM   5454  H2  WAT  1304      24.858 -18.979  34.997  1.00  0.00
ATOM   5455  O   WAT  1305      36.752   5.554   0.867  1.00  0.00
ATOM   5456  H1  WAT  1305      36.584   5.359  -0.072  1.00  0.00
ATOM   5457  H2  WAT  1305      37.705   5.351   0.929  1.00  0.00
ATOM   5458  O   WAT  1306      31.005  -3.451  26.068  1.00  0.00
ATOM   5459  H1  WAT  1306      30.629  -2.559  26.196  1.00  0.00
ATOM   5460  H2  WAT  1306      30.719  -3.657  25.160  1.00  0.00
ATOM   5461  O   WAT  1307      33.533  39.568  33.462  1.00  0.00
ATOM   5462  H1  WAT  1307      33.973  38.687  33.347  1.00  0.00
ATOM   5463  H2  WAT  1307      33.366  39.537  34.431  1.00  0.00
ATOM   5464  O   WAT  1308      18.216  30.220  -3.841  1.00  0.00
ATOM   5465  H1  WAT  1308      17.361  30.016  -3.381  1.00  0.00
ATOM   5466  H2  WAT  1308      17.993  31.122  -4.168  1.00  0.00
ATOM   5467  O   WAT  1309      18.534  39.952 -17.329  1.00  0.00
ATOM   5468  H1  WAT  1309      18.383  39.625 -18.243  1.00  0.00
ATOM   5469  H2  WAT  1309      19.487  40.155 -17.376  1.00  0.00
ATOM   5470  O   WAT  1310      23.267  28.458  -6.827  1.00  0.00
ATOM   5471  H1  WAT  1310      23.677  28.356  -7.722  1.00  0.00
ATOM   5472  H2  WAT  1310      22.334  28.633  -7.120  1.00  0.00
ATOM   5473  O   WAT  1311      23.552  26.140  23.042  1.00  0.00
ATOM   5474  H1  WAT  1311      24.478  25.823  23.009  1.00  0.00
ATOM   5475  H2  WAT  1311      23.174  25.655  22.286  1.00  0.00
ATOM   5476  O   WAT  1312     -17.074 -16.100 -14.121  1.00  0.00
ATOM   5477  H1  WAT  1312     -16.903 -15.777 -15.027  1.00  0.00
ATOM   5478  H2  WAT  1312     -17.039 -17.063 -14.238  1.00  0.00
ATOM   5479  O   WAT  1313      26.186 -13.295  34.693  1.00  0.00
ATOM   5480  H1  WAT  1313      27.062 -13.119  34.286  1.00  0.00
ATOM   5481  H2  WAT  1313      26.288 -14.265  34.861  1.00  0.00
ATOM   5482  O   WAT  1314      39.871  -7.505 -10.460  1.00  0.00
ATOM   5483  H1  WAT  1314      39.316  -8.026  -9.840  1.00  0.00
ATOM   5484  H2  WAT  1314      39.326  -7.609 -11.278  1.00  0.00
ATOM   5485  O   WAT  1315     -27.031  35.665 -25.332  1.00  0.00
ATOM   5486  H1  WAT  1315     -26.119  35.294 -25.336  1.00  0.00
ATOM   5487  H2  WAT  1315     -27.519  34.909 -24.959  1.00  0.00
ATOM   5488  O   WAT  1316       1.135 -14.883   5.511  1.00  0.00
ATOM   5489  H1  WAT  1316       1.122 -14.801   6.498  1.00  0.00
ATOM   5490  H2  WAT  1316       0.176 -15.087   5.369  1.00  0.00
ATOM   5491  O   WAT  1317      35.090   4.407 -15.952  1.00  0.00
ATOM   5492  H1  WAT  1317      35.228   4.668 -16.888  1.00  0.00
ATOM   5493  H2  WAT  1317      35.954   4.646 -15.563  1.00  0.00
ATOM   5494  O   WAT  1318      -5.854  37.335  -5.912  1.00  0.00
ATOM   5495  H1  WAT  1318      -6.338  37.231  -6.768  1.00  0.00
ATOM   5496  H2  WAT  1318      -5.185  36.627  -6.026  1.00  0.00
ATOM   5497  O   WAT  1319      -0.556  31.220  10.401  1.00  0.00
ATOM   5498  H1  WAT  1319      -0.634  31.135   9.419  1.00  0.00
ATOM   5499  H2  WAT  1319      -0.623  32.192  10.485  1.00  0.00
ATOM   5500  O   WAT  1320      26.341  24.490 -21.929  1.00  0.00
ATOM   5501  H1  WAT  1320      25.669  25.192 -22.063  1.00  0.00
ATOM   5502  H2  WAT  1320      26.851  24.855 -21.191  1.00  0.00
ATOM   5503  O   WAT  1321      -0.328   1.713 -24.570  1.00  0.00
ATOM   5504  H1  WAT  1321       0.572   1.935 -24.913  1.00  0.00
ATOM   5505  H2  WAT  1321      -0.397   0.793 -24.899  1.00  0.00
ATOM   5506  O   WAT  1322      26.583  19.200  38.331  1.00  0.00
ATOM   5507  H1  WAT  1322      27.424  18.762  38.611  1.00  0.00
ATOM   5508  H2  WAT  1322      26.288  19.529  39.216  1.00  0.00
ATOM   5509  O   WAT  1323      12.338   4.237  33.159  1.00  0.00
ATOM   5510  H1  WAT  1323      12.578   5.209  33.152  1.00  0.00
ATOM   5511  H2  WAT  1323      11.999   4.172  34.066  1.00  0.00
ATOM   5512  O   WAT  1324      19.248  -2.755 -17.262  1.00  0.00
ATOM   5513  H1  WAT  1324      19.415  -1.797 -17.243  1.00  0.00
ATOM   5514  H2  WAT  1324      18.735  -2.867 -16.431  1.00  0.00
ATOM   5515  O   WAT  1325      28.478 -12.902 -13.176  1.00  0.00
ATOM   5516  H1  WAT  1325      29.227 -12.759 -12.530  1.00  0.00
ATOM   5517  H2  WAT  1325      28.026 -13.628 -12.668  1.00  0.00
ATOM   5518  O   WAT  1326      11.984   2.796 -23.491  1.00  0.00
ATOM   5519  H1  WAT  1326      11.421   3.443 -23.971  1.00  0.00
ATOM   5520  H2  WAT  1326      11.548   1.960 -23.731  1.00  0.00
ATOM   5521  O   WAT  1327      17.729   5.711 -18.729  1.00  0.00
ATOM   5522  H1  WAT  1327      17.998   4.900 -19.204  1.00  0.00
ATOM   5523  H2  WAT  1327      17.411   5.313 -17.880  1.00  0.00
ATOM   5524  O   WAT  1328      21.005  38.194   0.939  1.00  0.00
ATOM   5525  H1  WAT  1328      20.432  37.641   1.504  1.00  0.00
ATOM   5526  H2  WAT  1328      21.305  38.868   1.571  1.00  0.00
ATOM   5527  O   WAT  1329      -6.665 -13.744  21.922  1.00  0.00
ATOM   5528  H1  WAT  1329      -6.425 -13.513  20.997  1.00  0.00
ATOM   5529  H2  WAT  1329      -5.829 -13.514  22.371  1.00  0.00
ATOM   5530  O   WAT  1330      -4.651 -15.538  41.773  1.00  0.00
ATOM   5531  H1  WAT  1330      -3.695 -15.683  41.949  1.00  0.00
ATOM   5532  H2  WAT  1330      -5.003 -15.652  42.685  1.00  0.00
ATOM   5533  O   WAT  1331      13.673  -3.671  -1.935  1.00  0.00
ATOM   5534  H1  WAT  1331      13.142  -2.855  -1.900  1.00  0.00
ATOM   5535  H2  WAT  1331      14.473  -3.377  -1.429  1.00  0.00
ATOM   5536  O   WAT  1332      14.791 -12.762  36.473  1.00  0.00
ATOM   5537  H1  WAT  1332      14.114 -12.753  37.183  1.00  0.00
ATOM   5538  H2  WAT  1332      15.583 -13.032  36.967  1.00  0.00
ATOM   5539  O   WAT  1333      19.852  12.385  -4.508  1.00  0.00
ATOM   5540  H1  WAT  1333      19.393  11.563  -4.203  1.00  0.00
ATOM   5541  H2  WAT  1333      20.634  12.357  -3.913  1.00  0.00
ATOM   5542  O   WAT  1334      20.905 -12.727  34.894  1.00  0.00
ATOM   5543  H1  WAT  1334      20.595 -11.873  34.510  1.00  0.00
ATOM   5544  H2  WAT  1334      21.759 -12.429  35.281  1.00  0.00
ATOM   5545  O   WAT  1335       9.896 -10.075  -7.113  1.00  0.00
ATOM   5546  H1  WAT  1335      10.228  -9.598  -7.903  1.00  0.00
ATOM   5547  H2  WAT  1335       9.318 -10.742  -7.586  1.00  0.00
ATOM   5548  O   WAT  1336      -9.783 -17.818  -0.139  1.00  0.00
ATOM   5549  H1  WAT  1336     -10.626 -18.092  -0.549  1.00  0.00
ATOM   5550  H2  WAT  1336     -10.086 -17.643   0.778  1.00  0.00
ATOM   5551  O   WAT  1337      28.194  29.835 -25.916  1.00  0.00
ATOM   5552  H1  WAT  1337      27.444  30.358 -26.274  1.00  0.00
ATOM   5553  H2  WAT  1337      28.900  30.074 -26.539  1.00  0.00
ATOM   5554  O   WAT  1338      20.873  -0.920   7.616  1.00  0.00
ATOM   5555  H1  WAT  1338      21.144   0.030   7.611  1.00  0.00
ATOM   5556  H2  WAT  1338      21.737  -1.330   7.826  1.00  0.00
ATOM   5557  O   WAT  1339     -30.798  -9.278 -17.225  1.00  0.00
ATOM   5558  H1  WAT  1339     -30.066  -9.926 -17.188  1.00  0.00
ATOM   5559  H2  WAT  1339     -30.804  -9.097 -18.201  1.00  0.00
ATOM   5560  O   WAT  1340      35.434  27.893 -25.996  1.00  0.00
ATOM   5561  H1  WAT  1340      35.035  27.236 -26.600  1.00  0.00
ATOM   5562  H2  WAT  1340      34.740  27.972 -25.319  1.00  0.00
ATOM   5563  O   WAT  1341      36.794 -11.095 -15.516  1.00  0.00
ATOM   5564  H1  WAT  1341      37.289 -10.884 -16.335  1.00  0.00
ATOM   5565  H2  WAT  1341      37.499 -10.907 -14.852  1.00  0.00
ATOM   5566  O   WAT  1342     -15.982 -10.644   5.257  1.00  0.00
ATOM   5567  H1  WAT  1342     -16.220  -9.922   4.621  1.00  0.00
ATOM   5568  H2  WAT  1342     -16.072 -10.145   6.098  1.00  0.00
ATOM   5569  O   WAT  1343     -13.845  35.272  36.270  1.00  0.00
ATOM   5570  H1  WAT  1343     -13.858  36.223  36.063  1.00  0.00
ATOM   5571  H2  WAT  1343     -13.249  34.938  35.567  1.00  0.00
ATOM   5572  O   WAT  1344      24.777  26.581 -22.280  1.00  0.00
ATOM   5573  H1  WAT  1344      23.953  26.049 -22.172  1.00  0.00
ATOM   5574  H2  WAT  1344      24.933  26.860 -21.353  1.00  0.00
ATOM   5575  O   WAT  1345      25.387  -4.845  17.187  1.00  0.00
ATOM   5576  H1  WAT  1345      25.750  -4.845  18.110  1.00  0.00
ATOM   5577  H2  WAT  1345      25.377  -5.835  17.051  1.00  0.00
ATOM   5578  O   WAT  1346      30.160   7.769  22.824  1.00  0.00
ATOM   5579  H1  WAT  1346      29.696   7.641  23.686  1.00  0.00
ATOM   5580  H2  WAT  1346      30.691   6.954  22.795  1.00  0.00
ATOM   5581  O   WAT  1347     -12.619  21.566 -14.347  1.00  0.00
ATOM   5582  H1  WAT  1347     -13.429  22.061 -14.088  1.00  0.00
ATOM   5583  H2  WAT  1347     -12.392  22.001 -15.184  1.00  0.00
ATOM   5584  O   WAT  1348     -27.164  27.134 -20.554  1.00  0.00
ATOM   5585  H1  WAT  1348     -26.852  26.208 -20.508  1.00  0.00
ATOM   5586  H2  WAT  1348     -27.839  27.052 -21.267  1.00  0.00
ATOM   5587  O   WAT  1349       4.735   6.990  38.846  1.00  0.00
ATOM   5588  H1  WAT  1349       3.966   7.547  39.117  1.00  0.00
ATOM   5589  H2  WAT  1349       5.408   7.335  39.467  1.00  0.00
ATOM   5590  O   WAT  1350      -3.649  -8.772   7.336  1.00  0.00
ATOM   5591  H1  WAT  1350      -3.449  -8.983   6.400  1.00  0.00
ATOM   5592  H2  WAT  1350      -3.328  -9.569   7.785  1.00  0.00
ATOM   5593  O   WAT  1351      19.639   0.788  18.844  1.00  0.00
ATOM   5594  H1  WAT  1351      19.321   1.117  17.974  1.00  0.00
ATOM   5595  H2  WAT  1351      18.805   0.504  19.248  1.00  0.00
ATOM   5596  O   WAT  1352      38.009  17.623  25.195  1.00  0.00
ATOM   5597  H1  WAT  1352      37.824  17.903  24.272  1.00  0.00
ATOM   5598  H2  WAT  1352      37.567  16.751  25.205  1.00  0.00
ATOM   5599  O   WAT  1353     -26.056 -11.153  24.482  1.00  0.00
ATOM   5600  H1  WAT  1353     -26.331 -12.018  24.107  1.00  0.00
ATOM   5601  H2  WAT  1353     -25.381 -10.888  23.830  1.00  0.00
ATOM   5602  O   WAT  1354      37.572  -4.719 -19.583  1.00  0.00
ATOM   5603  H1  WAT  1354      37.322  -5.398 -20.240  1.00  0.00
ATOM   5604  H2  WAT  1354      38.324  -4.290 -20.020  1.00  0.00
ATOM   5605  O   WAT  1355     -15.248  -6.478  35.445  1.00  0.00
ATOM   5606  H1  WAT  1355     -15.383  -7.410  35.722  1.00  0.00
ATOM   5607  H2  WAT  1355     -16.154  -6.124  35.595  1.00  0.00
ATOM   5608  O   WAT  1356      19.772 -13.423 -23.182  1.00  0.00
ATOM   5609  H1  WAT  1356      19.466 -12.956 -22.368  1.00  0.00
ATOM   5610  H2  WAT  1356      19.661 -12.699 -23.833  1.00  0.00
ATOM   5611  O   WAT  1357      -2.630 -10.920  24.378  1.00  0.00
ATOM   5612  H1  WAT  1357      -2.035 -10.203  24.681  1.00  0.00
ATOM   5613  H2  WAT  1357      -3.217 -10.385  23.782  1.00  0.00
ATOM   5614  O   WAT  1358      17.663  39.900  -0.641  1.00  0.00
ATOM   5615  H1  WAT  1358      18.549  40.225  -0.913  1.00  0.00
ATOM   5616  H2  WAT  1358      17.446  39.337  -1.412  1.00  0.00
ATOM   5617  O   WAT  1359      17.086  23.724 -19.528  1.00  0.00
ATOM   5618  H1  WAT  1359      17.870  24.172 -19.917  1.00  0.00
ATOM   5619  H2  WAT  1359      16.480  23.722 -20.293  1.00  0.00
ATOM   5620  O   WAT  1360      30.559  20.087  11.951  1.00  0.00
ATOM   5621  H1  WAT  1360      30.399  19.295  12.506  1.00  0.00
ATOM   5622  H2  WAT  1360      31.306  19.755  11.399  1.00  0.00
ATOM   5623  O   WAT  1361      40.495  24.525 -24.438  1.00  0.00
ATOM   5624  H1  WAT  1361      41.148  23.798 -24.427  1.00  0.00
ATOM   5625  H2  WAT  1361      39.712  24.079 -24.801  1.00  0.00
ATOM   5626  O   WAT  1362     -10.670  -0.813 -22.794  1.00  0.00
ATOM   5627  H1  WAT  1362     -10.789  -0.518 -21.867  1.00  0.00
ATOM   5628  H2  WAT  1362     -11.054  -0.048 -23.274  1.00  0.00
ATOM   5629  O   WAT  1363      26.238 -17.080 -11.581  1.00  0.00
ATOM   5630  H1  WAT  1363      25.472 -16.685 -12.037  1.00  0.00
ATOM   5631  H2  WAT  1363      26.947 -16.448 -11.857  1.00  0.00
ATOM   5632  O   WAT  1364     -26.608  33.277  39.032  1.00  0.00
ATOM   5633  H1  WAT  1364     -26.485  34.242  38.892  1.00  0.00
ATOM   5634  H2  WAT  1364     -26.173  32.953  38.192  1.00  0.00
ATOM   5635  O   WAT  1365      11.812  38.890  15.547  1.00  0.00
ATOM   5636  H1  WAT  1365      10.979  39.244  15.188  1.00  0.00
ATOM   5637  H2  WAT  1365      11.896  39.420  16.369  1.00  0.00
ATOM   5638  O   WAT  1366      27.301 -12.567  13.951  1.00  0.00
ATOM   5639  H1  WAT  1366      28.263 -12.418  14.028  1.00  0.00
ATOM   5640  H2  WAT  1366      27.295 -13.407  13.441  1.00  0.00
ATOM   5641  O   WAT  1367      40.862  24.463  -2.739  1.00  0.00
ATOM   5642  H1  WAT  1367      40.605  24.174  -1.834  1.00  0.00
ATOM   5643  H2  WAT  1367      41.028  23.575  -3.141  1.00  0.00
ATOM   5644  O   WAT  1368      13.862  30.401  -3.547  1.00  0.00
ATOM   5645  H1  WAT  1368      13.714  31.356  -3.380  1.00  0.00
ATOM   5646  H2  WAT  1368      13.282  30.015  -2.855  1.00  0.00
ATOM   5647  O   WAT  1369      17.557  -0.499 -15.124  1.00  0.00
ATOM   5648  H1  WAT  1369      16.618  -0.425 -15.412  1.00  0.00
ATOM   5649  H2  WAT  1369      17.684  -1.468 -15.268  1.00  0.00
ATOM   5650  O   WAT  1370      13.927 -11.218  31.672  1.00  0.00
ATOM   5651  H1  WAT  1370      12.995 -11.491  31.682  1.00  0.00
ATOM   5652  H2  WAT  1370      14.032 -10.827  32.552  1.00  0.00
ATOM   5653  O   WAT  1371       9.995  34.396  34.625  1.00  0.00
ATOM   5654  H1  WAT  1371      10.556  34.429  33.825  1.00  0.00
ATOM   5655  H2  WAT  1371      10.487  34.979  35.224  1.00  0.00
ATOM   5656  O   WAT  1372     -15.325  -1.628 -19.785  1.00  0.00
ATOM   5657  H1  WAT  1372     -14.795  -0.809 -19.952  1.00  0.00
ATOM   5658  H2  WAT  1372     -15.279  -2.024 -20.680  1.00  0.00
ATOM   5659  O   WAT  1373      27.761 -10.856   9.578  1.00  0.00
ATOM   5660  H1  WAT  1373      28.007 -10.050   9.079  1.00  0.00
ATOM   5661  H2  WAT  1373      28.561 -10.959  10.144  1.00  0.00
ATOM   5662  O   WAT  1374      31.786 -19.811 -11.662  1.00  0.00
ATOM   5663  H1  WAT  1374      30.801 -19.751 -11.662  1.00  0.00
ATOM   5664  H2  WAT  1374      31.881 -20.629 -11.113  1.00  0.00
ATOM   5665  O   WAT  1375       8.958   5.450  35.709  1.00  0.00
ATOM   5666  H1  WAT  1375       8.795   4.783  36.396  1.00  0.00
ATOM   5667  H2  WAT  1375       8.193   5.265  35.111  1.00  0.00
ATOM   5668  O   WAT  1376      30.503  36.174  -6.149  1.00  0.00
ATOM   5669  H1  WAT  1376      29.998  36.903  -5.699  1.00  0.00
ATOM   5670  H2  WAT  1376      29.945  35.409  -5.863  1.00  0.00
ATOM   5671  O   WAT  1377      33.481   7.418  26.265  1.00  0.00
ATOM   5672  H1  WAT  1377      33.160   7.182  27.164  1.00  0.00
ATOM   5673  H2  WAT  1377      34.146   8.114  26.501  1.00  0.00
ATOM   5674  O   WAT  1378      -5.983 -20.098  31.010  1.00  0.00
ATOM   5675  H1  WAT  1378      -6.605 -19.325  30.881  1.00  0.00
ATOM   5676  H2  WAT  1378      -5.175 -19.600  31.243  1.00  0.00
ATOM   5677  O   WAT  1379      32.859  27.242  31.862  1.00  0.00
ATOM   5678  H1  WAT  1379      33.836  27.230  31.783  1.00  0.00
ATOM   5679  H2  WAT  1379      32.655  26.497  31.229  1.00  0.00
ATOM   5680  O   WAT  1380      -6.770  10.872 -25.042  1.00  0.00
ATOM   5681  H1  WAT  1380      -7.218  10.986 -25.904  1.00  0.00
ATOM   5682  H2  WAT  1380      -5.831  10.865 -25.332  1.00  0.00
ATOM   5683  O   WAT  1381      19.654  15.204  39.327  1.00  0.00
ATOM   5684  H1  WAT  1381      19.346  14.258  39.194  1.00  0.00
ATOM   5685  H2  WAT  1381      20.616  15.034  39.131  1.00  0.00
ATOM   5686  O   WAT  1382      21.241  -6.210 -16.372  1.00  0.00
ATOM   5687  H1  WAT  1382      21.470  -6.321 -17.332  1.00  0.00
ATOM   5688  H2  WAT  1382      20.269  -6.355 -16.440  1.00  0.00
ATOM   5689  O   WAT  1383      33.679  37.865  12.606  1.00  0.00
ATOM   5690  H1  WAT  1383      32.712  37.706  12.515  1.00  0.00
ATOM   5691  H2  WAT  1383      33.730  38.107  13.554  1.00  0.00
ATOM   5692  O   WAT  1384      29.986  20.507  -4.482  1.00  0.00
ATOM   5693  H1  WAT  1384      30.368  20.782  -5.346  1.00  0.00
ATOM   5694  H2  WAT  1384      30.034  19.529  -4.586  1.00  0.00
ATOM   5695  O   WAT  1385     -16.942 -15.396  26.183  1.00  0.00
ATOM   5696  H1  WAT  1385     -17.513 -16.029  26.680  1.00  0.00
ATOM   5697  H2  WAT  1385     -17.472 -14.580  26.298  1.00  0.00
ATOM   5698  O   WAT  1386      19.572  31.790  24.835  1.00  0.00
ATOM   5699  H1  WAT  1386      19.645  32.176  23.931  1.00  0.00
ATOM   5700  H2  WAT  1386      18.608  31.924  24.989  1.00  0.00
ATOM   5701  O   WAT  1387      26.725  39.116 -21.377  1.00  0.00
ATOM   5702  H1  WAT  1387      26.291  38.685 -22.161  1.00  0.00
ATOM   5703  H2  WAT  1387      27.274  38.344 -21.088  1.00  0.00
ATOM   5704  O   WAT  1388      12.518  39.239 -15.624  1.00  0.00
ATOM   5705  H1  WAT  1388      13.351  39.778 -15.618  1.00  0.00
ATOM   5706  H2  WAT  1388      11.996  39.799 -14.992  1.00  0.00
ATOM   5707  O   WAT  1389      -2.279  35.526 -19.130  1.00  0.00
ATOM   5708  H1  WAT  1389      -2.570  35.416 -20.049  1.00  0.00
ATOM   5709  H2  WAT  1389      -1.612  34.798 -19.066  1.00  0.00
ATOM   5710  O   WAT  1390     -21.378  22.192 -15.417  1.00  0.00
ATOM   5711  H1  WAT  1390     -20.442  21.910 -15.308  1.00  0.00
ATOM   5712  H2  WAT  1390     -21.316  22.562 -16.338  1.00  0.00
ATOM   5713  O   WAT  1391      27.387  16.047  25.340  1.00  0.00
ATOM   5714  H1  WAT  1391      27.809  16.029  24.452  1.00  0.00
ATOM   5715  H2  WAT  1391      28.016  15.467  25.828  1.00  0.00
ATOM   5716  O   WAT  1392      25.943  32.568 -17.878  1.00  0.00
ATOM   5717  H1  WAT  1392      25.220  31.974 -17.624  1.00  0.00
ATOM   5718  H2  WAT  1392      26.534  32.471 -17.087  1.00  0.00
ATOM   5719  O   WAT  1393       3.900 -17.482  -7.902  1.00  0.00
ATOM   5720  H1  WAT  1393       4.036 -16.505  -7.946  1.00  0.00
ATOM   5721  H2  WAT  1393       4.731 -17.781  -8.329  1.00  0.00
ATOM   5722  O   WAT  1394      25.058 -10.228  28.166  1.00  0.00
ATOM   5723  H1  WAT  1394      25.384 -10.089  29.079  1.00  0.00
ATOM   5724  H2  WAT  1394      25.581 -11.008  27.909  1.00  0.00
ATOM   5725  O   WAT  1395      38.203 -10.402 -23.988  1.00  0.00
ATOM   5726  H1  WAT  1395      37.657  -9.598 -24.198  1.00  0.00
ATOM   5727  H2  WAT  1395      37.545 -11.090 -24.271  1.00  0.00
ATOM   5728  O   WAT  1396      35.033 -10.028  13.495  1.00  0.00
ATOM   5729  H1  WAT  1396      35.028 -10.003  12.513  1.00  0.00
ATOM   5730  H2  WAT  1396      35.169  -9.073  13.682  1.00  0.00
ATOM   5731  O   WAT  1397      23.536 -20.291  34.538  1.00  0.00
ATOM   5732  H1  WAT  1397      23.955 -21.180  34.583  1.00  0.00
ATOM   5733  H2  WAT  1397      22.697 -20.479  35.020  1.00  0.00
ATOM   5734  O   WAT  1398      41.318  19.709  32.768  1.00  0.00
ATOM   5735  H1  WAT  1398      42.228  19.507  32.489  1.00  0.00
ATOM   5736  H2  WAT  1398      41.120  18.931  33.333  1.00  0.00
ATOM   5737  O   WAT  1399      20.833  36.382  33.655  1.00  0.00
ATOM   5738  H1  WAT  1399      20.134  35.914  33.130  1.00  0.00
ATOM   5739  H2  WAT  1399      20.641  37.308  33.358  1.00  0.00
ATOM   5740  O   WAT  1400      36.066  32.143  22.239  1.00  0.00
ATOM   5741  H1  WAT  1400      35.335  31.803  21.681  1.00  0.00
ATOM   5742  H2  WAT  1400      36.175  33.035  21.830  1.00  0.00
ATOM   5743  O   WAT  1401      37.227   6.530 -11.011  1.00  0.00
ATOM   5744  H1  WAT  1401      38.013   6.039 -10.718  1.00  0.00
ATOM   5745  H2  WAT  1401      36.525   6.093 -10.485  1.00  0.00
ATOM   5746  O   WAT  1402      31.907  32.515  22.713  1.00  0.00
ATOM   5747  H1  WAT  1402      32.025  33.450  23.008  1.00  0.00
ATOM   5748  H2  WAT  1402      31.595  32.143  23.587  1.00  0.00
ATOM   5749  O   WAT  1403      28.441  14.593  38.502  1.00  0.00
ATOM   5750  H1  WAT  1403      28.373  14.349  37.533  1.00  0.00
ATOM   5751  H2  WAT  1403      27.487  14.766  38.662  1.00  0.00
ATOM   5752  O   WAT  1404     -25.344 -16.850 -13.693  1.00  0.00
ATOM   5753  H1  WAT  1404     -25.439 -15.993 -14.155  1.00  0.00
ATOM   5754  H2  WAT  1404     -24.457 -16.709 -13.276  1.00  0.00
ATOM   5755  O   WAT  1405      21.916   3.851 -24.906  1.00  0.00
ATOM   5756  H1  WAT  1405      21.841   4.096 -25.861  1.00  0.00
ATOM   5757  H2  WAT  1405      21.443   2.974 -24.955  1.00  0.00
ATOM   5758  O   WAT  1406      -0.198  34.328  10.741  1.00  0.00
ATOM   5759  H1  WAT  1406      -0.877  34.320  11.441  1.00  0.00
ATOM   5760  H2  WAT  1406      -0.726  34.662   9.981  1.00  0.00
ATOM   5761  O   WAT  1407       7.884  34.232   7.067  1.00  0.00
ATOM   5762  H1  WAT  1407       7.160  34.054   7.693  1.00  0.00
ATOM   5763  H2  WAT  1407       8.669  34.102   7.616  1.00  0.00
ATOM   5764  O   WAT  1408      -7.351  -0.518  41.457  1.00  0.00
ATOM   5765  H1  WAT  1408      -6.398  -0.704  41.503  1.00  0.00
ATOM   5766  H2  WAT  1408      -7.715  -1.313  41.909  1.00  0.00
ATOM   5767  O   WAT  1409      -7.998  39.982 -25.245  1.00  0.00
ATOM   5768  H1  WAT  1409      -8.860  40.312 -24.941  1.00  0.00
ATOM   5769  H2  WAT  1409      -7.401  40.324 -24.552  1.00  0.00
ATOM   5770  O   WAT  1410      24.297  30.131 -12.688  1.00  0.00
ATOM   5771  H1  WAT  1410      23.405  29.689 -12.582  1.00  0.00
ATOM   5772  H2  WAT  1410      24.530  29.711 -13.564  1.00  0.00
ATOM   5773  O   WAT  1411      22.498   4.953 -12.859  1.00  0.00
ATOM   5774  H1  WAT  1411      22.086   4.489 -13.609  1.00  0.00
ATOM   5775  H2  WAT  1411      23.443   4.738 -13.014  1.00  0.00
ATOM   5776  O   WAT  1412      30.696  16.814 -19.558  1.00  0.00
ATOM   5777  H1  WAT  1412      30.944  15.858 -19.599  1.00  0.00
ATOM   5778  H2  WAT  1412      31.549  17.221 -19.782  1.00  0.00
ATOM   5779  O   WAT  1413      21.423  -3.850  -5.824  1.00  0.00
ATOM   5780  H1  WAT  1413      20.498  -4.052  -5.605  1.00  0.00
ATOM   5781  H2  WAT  1413      21.643  -4.600  -6.411  1.00  0.00
ATOM   5782  O   WAT  1414      19.839  -9.639 -14.702  1.00  0.00
ATOM   5783  H1  WAT  1414      19.866  -9.472 -15.676  1.00  0.00
ATOM   5784  H2  WAT  1414      20.812  -9.595 -14.515  1.00  0.00
ATOM   5785  O   WAT  1415       1.412  36.172  12.088  1.00  0.00
ATOM   5786  H1  WAT  1415       0.989  35.428  11.605  1.00  0.00
ATOM   5787  H2  WAT  1415       2.358  35.926  11.981  1.00  0.00
ATOM   5788  O   WAT  1416      30.644   8.954  -9.466  1.00  0.00
ATOM   5789  H1  WAT  1416      31.236   9.688  -9.130  1.00  0.00
ATOM   5790  H2  WAT  1416      30.237   8.729  -8.588  1.00  0.00
ATOM   5791  O   WAT  1417      14.726  36.624   7.237  1.00  0.00
ATOM   5792  H1  WAT  1417      13.866  36.215   6.959  1.00  0.00
ATOM   5793  H2  WAT  1417      15.343  36.007   6.775  1.00  0.00
ATOM   5794  O   WAT  1418      -4.068 -17.756  22.994  1.00  0.00
ATOM   5795  H1  WAT  1418      -4.911 -17.535  22.520  1.00  0.00
ATOM   5796  H2  WAT  1418      -3.666 -16.848  22.991  1.00  0.00
ATOM   5797  O   WAT  1419      16.313   2.749 -18.533  1.00  0.00
ATOM   5798  H1  WAT  1419      16.388   3.484 -17.901  1.00  0.00
ATOM   5799  H2  WAT  1419      16.930   3.038 -19.238  1.00  0.00
ATOM   5800  O   WAT  1420       2.304 -19.134  23.745  1.00  0.00
ATOM   5801  H1  WAT  1420       1.697 -18.350  23.696  1.00  0.00
ATOM   5802  H2  WAT  1420       1.835 -19.650  24.431  1.00  0.00
ATOM   5803  O   WAT  1421      20.749  20.591  -8.053  1.00  0.00
ATOM   5804  H1  WAT  1421      20.071  21.193  -8.421  1.00  0.00
ATOM   5805  H2  WAT  1421      20.839  20.959  -7.152  1.00  0.00
ATOM   5806  O   WAT  1422     -22.873  -9.149  23.011  1.00  0.00
ATOM   5807  H1  WAT  1422     -23.479  -9.616  22.390  1.00  0.00
ATOM   5808  H2  WAT  1422     -23.084  -8.220  22.789  1.00  0.00
ATOM   5809  O   WAT  1423      23.851  35.762  -2.563  1.00  0.00
ATOM   5810  H1  WAT  1423      23.552  34.833  -2.558  1.00  0.00
ATOM   5811  H2  WAT  1423      24.207  35.842  -1.656  1.00  0.00
ATOM   5812  O   WAT  1424      22.847  20.758  13.331  1.00  0.00
ATOM   5813  H1  WAT  1424      23.492  20.114  13.737  1.00  0.00
ATOM   5814  H2  WAT  1424      23.174  21.568  13.811  1.00  0.00
ATOM   5815  O   WAT  1425      20.812 -16.589  17.281  1.00  0.00
ATOM   5816  H1  WAT  1425      21.777 -16.427  17.405  1.00  0.00
ATOM   5817  H2  WAT  1425      20.564 -15.738  16.855  1.00  0.00
ATOM   5818  O   WAT  1426      24.796  -5.838 -18.831  1.00  0.00
ATOM   5819  H1  WAT  1426      25.067  -6.170 -19.708  1.00  0.00
ATOM   5820  H2  WAT  1426      25.660  -5.693 -18.409  1.00  0.00
ATOM   5821  O   WAT  1427       6.774   9.480  35.365  1.00  0.00
ATOM   5822  H1  WAT  1427       7.411   9.041  35.971  1.00  0.00
ATOM   5823  H2  WAT  1427       7.351   9.647  34.593  1.00  0.00
ATOM   5824  O   WAT  1428      19.752   1.830 -17.511  1.00  0.00
ATOM   5825  H1  WAT  1428      20.115   2.297 -18.298  1.00  0.00
ATOM   5826  H2  WAT  1428      20.521   1.279 -17.270  1.00  0.00
ATOM   5827  O   WAT  1429      17.190  35.250  25.221  1.00  0.00
ATOM   5828  H1  WAT  1429      16.261  35.083  25.490  1.00  0.00
ATOM   5829  H2  WAT  1429      17.420  34.373  24.855  1.00  0.00
ATOM   5830  O   WAT  1430      24.175  -2.726 -17.341  1.00  0.00
ATOM   5831  H1  WAT  1430      24.262  -2.003 -16.676  1.00  0.00
ATOM   5832  H2  WAT  1430      23.938  -3.471 -16.753  1.00  0.00
ATOM   5833  O   WAT  1431      -2.169  -5.989   8.591  1.00  0.00
ATOM   5834  H1  WAT  1431      -2.404  -6.852   8.211  1.00  0.00
ATOM   5835  H2  WAT  1431      -1.542  -5.657   7.907  1.00  0.00
ATOM   5836  O   WAT  1432      19.491  35.958 -10.879  1.00  0.00
ATOM   5837  H1  WAT  1432      19.752  35.052 -11.196  1.00  0.00
ATOM   5838  H2  WAT  1432      19.879  35.925  -9.984  1.00  0.00
ATOM   5839  O   WAT  1433       4.733 -18.653  29.385  1.00  0.00
ATOM   5840  H1  WAT  1433       4.029 -18.798  28.714  1.00  0.00
ATOM   5841  H2  WAT  1433       5.014 -19.567  29.554  1.00  0.00
ATOM   5842  O   WAT  1434      35.194  -8.810  16.828  1.00  0.00
ATOM   5843  H1  WAT  1434      35.542  -8.073  17.390  1.00  0.00
ATOM   5844  H2  WAT  1434      35.417  -8.446  15.942  1.00  0.00
ATOM   5845  O   WAT  1435     -23.071  24.864   9.463  1.00  0.00
ATOM   5846  H1  WAT  1435     -22.102  25.021   9.437  1.00  0.00
ATOM   5847  H2  WAT  1435     -23.158  24.566  10.402  1.00  0.00
ATOM   5848  O   WAT  1436       0.126  30.308   3.254  1.00  0.00
ATOM   5849  H1  WAT  1436       0.671  30.333   4.074  1.00  0.00
ATOM   5850  H2  WAT  1436       0.378  31.166   2.856  1.00  0.00
ATOM   5851  O   WAT  1437      11.424  29.541  32.217  1.00  0.00
ATOM   5852  H1  WAT  1437      12.202  29.286  31.681  1.00  0.00
ATOM   5853  H2  WAT  1437      11.550  30.525  32.227  1.00  0.00
ATOM   5854  O   WAT  1438      11.740   0.188  40.460  1.00  0.00
ATOM   5855  H1  WAT  1438      11.644   0.414  41.412  1.00  0.00
ATOM   5856  H2  WAT  1438      12.184  -0.683  40.540  1.00  0.00
ATOM   5857  O   WAT  1439      27.053 -21.609  19.345  1.00  0.00
ATOM   5858  H1  WAT  1439      27.639 -21.808  18.575  1.00  0.00
ATOM   5859  H2  WAT  1439      26.208 -21.449  18.869  1.00  0.00
ATOM   5860  O   WAT  1440      26.661  22.405  14.232  1.00  0.00
ATOM   5861  H1  WAT  1440      26.886  21.445  14.172  1.00  0.00
ATOM   5862  H2  WAT  1440      27.535  22.795  14.035  1.00  0.00
ATOM   5863  O   WAT  1441      16.850  32.320  25.453  1.00  0.00
ATOM   5864  H1  WAT  1441      16.051  32.722  25.018  1.00  0.00
ATOM   5865  H2  WAT  1441      16.387  31.955  26.253  1.00  0.00
ATOM   5866  O   WAT  1442       7.958  17.915 -18.352  1.00  0.00
ATOM   5867  H1  WAT  1442       8.338  18.027 -17.445  1.00  0.00
ATOM   5868  H2  WAT  1442       8.339  18.722 -18.772  1.00  0.00
ATOM   5869  O   WAT  1443       6.569  37.975  16.210  1.00  0.00
ATOM   5870  H1  WAT  1443       5.654  38.143  16.502  1.00  0.00
ATOM   5871  H2  WAT  1443       6.857  38.877  15.964  1.00  0.00
ATOM   5872  O   WAT  1444      16.426  -1.739   9.626  1.00  0.00
ATOM   5873  H1  WAT  1444      17.324  -1.793  10.017  1.00  0.00
ATOM   5874  H2  WAT  1444      16.132  -2.664   9.764  1.00  0.00
ATOM   5875  O   WAT  1445      16.682  38.443  16.761  1.00  0.00
ATOM   5876  H1  WAT  1445      17.060  39.297  17.069  1.00  0.00
ATOM   5877  H2  WAT  1445      16.692  38.591  15.794  1.00  0.00
ATOM   5878  O   WAT  1446      -9.519  38.892 -13.372  1.00  0.00
ATOM   5879  H1  WAT  1446      -9.409  39.837 -13.199  1.00  0.00
ATOM   5880  H2  WAT  1446     -10.488  38.810 -13.443  1.00  0.00
ATOM   5881  O   WAT  1447      20.425  19.589  36.495  1.00  0.00
ATOM   5882  H1  WAT  1447      20.010  20.282  37.052  1.00  0.00
ATOM   5883  H2  WAT  1447      20.313  18.804  37.067  1.00  0.00
ATOM   5884  O   WAT  1448       2.047  26.064  29.079  1.00  0.00
ATOM   5885  H1  WAT  1448       2.059  25.091  29.129  1.00  0.00
ATOM   5886  H2  WAT  1448       1.707  26.195  28.169  1.00  0.00
ATOM   5887  O   WAT  1449      14.994  -6.943  15.803  1.00  0.00
ATOM   5888  H1  WAT  1449      15.811  -6.572  16.215  1.00  0.00
ATOM   5889  H2  WAT  1449      14.685  -7.511  16.535  1.00  0.00
ATOM   5890  O   WAT  1450      31.482 -10.451  36.095  1.00  0.00
ATOM   5891  H1  WAT  1450      31.249  -9.798  36.787  1.00  0.00
ATOM   5892  H2  WAT  1450      30.673 -10.444  35.555  1.00  0.00
ATOM   5893  O   WAT  1451     -24.173 -20.901  -3.935  1.00  0.00
ATOM   5894  H1  WAT  1451     -24.522 -21.723  -4.347  1.00  0.00
ATOM   5895  H2  WAT  1451     -24.994 -20.380  -3.848  1.00  0.00
ATOM   5896  O   WAT  1452      33.749  24.460  33.842  1.00  0.00
ATOM   5897  H1  WAT  1452      33.208  24.196  34.598  1.00  0.00
ATOM   5898  H2  WAT  1452      33.964  23.618  33.419  1.00  0.00
ATOM   5899  O   WAT  1453      -5.830 -19.041  15.074  1.00  0.00
ATOM   5900  H1  WAT  1453      -6.287 -19.488  15.814  1.00  0.00
ATOM   5901  H2  WAT  1453      -6.254 -19.472  14.309  1.00  0.00
ATOM   5902  O   WAT  1454       4.252  38.647  23.240  1.00  0.00
ATOM   5903  H1  WAT  1454       4.166  38.584  24.211  1.00  0.00
ATOM   5904  H2  WAT  1454       4.448  39.594  23.135  1.00  0.00
ATOM   5905  O   WAT  1455      22.694   8.210  24.275  1.00  0.00
ATOM   5906  H1  WAT  1455      22.545   8.576  25.189  1.00  0.00
ATOM   5907  H2  WAT  1455      21.898   8.590  23.841  1.00  0.00
ATOM   5908  O   WAT  1456      28.249  19.311  30.598  1.00  0.00
ATOM   5909  H1  WAT  1456      27.468  19.236  31.161  1.00  0.00
ATOM   5910  H2  WAT  1456      28.532  18.378  30.505  1.00  0.00
ATOM   5911  O   WAT  1457      29.518  -9.392   0.494  1.00  0.00
ATOM   5912  H1  WAT  1457      29.964 -10.275   0.541  1.00  0.00
ATOM   5913  H2  WAT  1457      28.729  -9.677  -0.047  1.00  0.00
ATOM   5914  O   WAT  1458      21.160  -2.242  34.777  1.00  0.00
ATOM   5915  H1  WAT  1458      21.340  -2.964  34.146  1.00  0.00
ATOM   5916  H2  WAT  1458      20.278  -2.525  35.113  1.00  0.00
ATOM   5917  O   WAT  1459      -7.566 -16.364 -11.100  1.00  0.00
ATOM   5918  H1  WAT  1459      -7.866 -15.544 -11.539  1.00  0.00
ATOM   5919  H2  WAT  1459      -6.701 -16.503 -11.521  1.00  0.00
ATOM   5920  O   WAT  1460     -19.831  21.165   1.916  1.00  0.00
ATOM   5921  H1  WAT  1460     -19.873  20.391   2.503  1.00  0.00
ATOM   5922  H2  WAT  1460     -19.934  20.740   1.039  1.00  0.00
ATOM   5923  O   WAT  1461       9.742 -11.996   7.861  1.00  0.00
ATOM   5924  H1  WAT  1461      10.732 -11.907   7.784  1.00  0.00
ATOM   5925  H2  WAT  1461       9.610 -11.386   8.623  1.00  0.00
ATOM   5926  O   WAT  1462      14.337  32.757  24.678  1.00  0.00
ATOM   5927  H1  WAT  1462      13.677  33.450  24.824  1.00  0.00
ATOM   5928  H2  WAT  1462      13.883  31.961  24.992  1.00  0.00
ATOM   5929  O   WAT  1463      -6.501 -19.360   9.787  1.00  0.00
ATOM   5930  H1  WAT  1463      -6.846 -19.452   8.859  1.00  0.00
ATOM   5931  H2  WAT  1463      -6.687 -18.410   9.931  1.00  0.00
ATOM   5932  O   WAT  1464      17.940  22.396 -17.404  1.00  0.00
ATOM   5933  H1  WAT  1464      17.629  22.838 -18.233  1.00  0.00
ATOM   5934  H2  WAT  1464      17.552  21.503 -17.547  1.00  0.00
ATOM   5935  O   WAT  1465       3.857  13.680  38.965  1.00  0.00
ATOM   5936  H1  WAT  1465       4.677  13.629  39.505  1.00  0.00
ATOM   5937  H2  WAT  1465       4.001  12.913  38.371  1.00  0.00
ATOM   5938  O   WAT  1466     -19.573  22.390  16.605  1.00  0.00
ATOM   5939  H1  WAT  1466     -19.012  21.586  16.651  1.00  0.00
ATOM   5940  H2  WAT  1466     -19.666  22.601  17.550  1.00  0.00
ATOM   5941  O   WAT  1467      -6.530  39.466  13.457  1.00  0.00
ATOM   5942  H1  WAT  1467      -5.682  38.976  13.619  1.00  0.00
ATOM   5943  H2  WAT  1467      -7.003  39.212  14.284  1.00  0.00
ATOM   5944  O   WAT  1468      14.306  26.602  26.936  1.00  0.00
ATOM   5945  H1  WAT  1468      13.632  27.313  27.021  1.00  0.00
ATOM   5946  H2  WAT  1468      15.033  27.120  26.515  1.00  0.00
ATOM   5947  O   WAT  1469      -0.242   2.821  33.440  1.00  0.00
ATOM   5948  H1  WAT  1469      -0.568   3.105  32.558  1.00  0.00
ATOM   5949  H2  WAT  1469       0.488   2.218  33.147  1.00  0.00
ATOM   5950  O   WAT  1470      -6.153  16.880  11.900  1.00  0.00
ATOM   5951  H1  WAT  1470      -6.385  17.260  12.779  1.00  0.00
ATOM   5952  H2  WAT  1470      -6.967  16.331  11.756  1.00  0.00
ATOM   5953  O   WAT  1471      -0.419  36.251  15.393  1.00  0.00
ATOM   5954  H1  WAT  1471      -0.443  36.652  16.289  1.00  0.00
ATOM   5955  H2  WAT  1471       0.287  35.586  15.518  1.00  0.00
ATOM   5956  O   WAT  1472       2.296  -4.582  11.302  1.00  0.00
ATOM   5957  H1  WAT  1472       2.690  -5.434  10.988  1.00  0.00
ATOM   5958  H2  WAT  1472       2.835  -4.473  12.128  1.00  0.00
ATOM   5959  O   WAT  1473      39.368   3.280  20.683  1.00  0.00
ATOM   5960  H1  WAT  1473      38.829   4.083  20.525  1.00  0.00
ATOM   5961  H2  WAT  1473      39.695   3.123  19.770  1.00  0.00
ATOM   5962  O   WAT  1474      -8.849  17.510  -8.900  1.00  0.00
ATOM   5963  H1  WAT  1474      -8.823  17.454  -9.886  1.00  0.00
ATOM   5964  H2  WAT  1474      -9.606  16.902  -8.735  1.00  0.00
ATOM   5965  O   WAT  1475     -27.596 -10.166  29.053  1.00  0.00
ATOM   5966  H1  WAT  1475     -27.849 -10.731  28.292  1.00  0.00
ATOM   5967  H2  WAT  1475     -26.683 -10.451  29.211  1.00  0.00
ATOM   5968  O   WAT  1476      12.922   1.112  17.770  1.00  0.00
[truncated: 1,467,647 more chars]
